# Supplementary material for: Iridium-catalysed hydroamination of internal homoallylic amines
Source: Royal Society of Chemistry journal article supplement (doi:10.1039/d3cc05594a), 2024-01-01

Supporting Information for:

## Iridium-Catalyzed Hydroamination of Internal Homoallylic Amines

An T. Ho<sup>1</sup>, Evan P. Venable<sup>2</sup>, Chelsea San Miguel<sup>1</sup>, and Kami L. Hull<sup>1,2\*</sup>

<sup>1</sup>Department of Chemistry, University of Illinois at Urbana-Champaign, Urbana, IL 61801

<sup>2</sup>Department of Chemistry, University of Texas at Austin, 100 E. 24th Street, Austin, TX 78712.

[kamihull@utexas.edu](mailto:kamihull@utexas.edu)

### TABLE OF CONTENTS

|    |                                                                     |    |
|----|---------------------------------------------------------------------|----|
| A. | General Information .....                                           | 2  |
| B. | Select Optimization .....                                           | 4  |
| C. | Substrate Synthesis .....                                           | 7  |
| D. | General Hydroamination Procedure and Product Characterization ..... | 12 |
| E. | Control Experiments .....                                           | 22 |
| F. | Mechanistic Investigations .....                                    | 24 |
| G. | X-Ray Crystal Structure Data for 10 and 22 .....                    | 30 |
| H. | References .....                                                    | 35 |
| I. | HRMS Spectra .....                                                  | 36 |
| J. | NMR Spectra .....                                                   | 98 |

## A. General Information

### *General Experimental Procedures:*

Unless otherwise specified, all reactions to synthesize homoallylic amines with air sensitive reagents (Grignards, etc.) were carried out in flame-dried glassware under an atmosphere of nitrogen; mildly air sensitive reactions (such as those involving  $\text{Ti}(\text{OEt})_4$ ) were not setup in flame-dried glassware. All hydroamination reactions were, and should be, setup under inert atmosphere; while the precatalysts, ligands, amines, and alkenes are all relatively air stable, the active catalyst is not. Nitrogen was dried by passing through drying tube equipped with Drierite. Air- and moisture-sensitive reagents were handled in a nitrogen-filled glovebox (working oxygen level  $\sim 1.0$  ppm) or using standard Schlenk technique. Column chromatography was performed with silica gel from Grace Division Discovery Sciences (35-75  $\mu\text{m}$  mesh); all columns were slurry packed. Analytical thin-layer chromatography (TLC) was performed on precoated glass silica gel plates purchased from EMD Chemicals Inc. and visualized with either short wave (254 nm) ultraviolet light or by staining with Ninhydrin stain or  $\text{KMnO}_4$  and briefly heating. Distillations were performed using a 3 cm short-path column under reduced pressure.

### *Instrumentation:*

$^1\text{H}$ ,  $^{13}\text{C}$ , and  $^{19}\text{F}$  NMR were recorded using a Varian Unity 400 or 500 MHz (100 or 125 MHz respectively for  $^{13}\text{C}$ ) or a VXR-500 MHz, Bruker Avance NEO 400 MHz (101 MHz for  $^{13}\text{C}$ , 376 MHz for  $^{19}\text{F}$ ), Agilent MR 400 MHz (101 MHz for  $^{13}\text{C}$ , 376 MHz for  $^{19}\text{F}$ ), Bruker Avance III 500 MHz (126 MHz for  $^{13}\text{C}$ , 471 MHz for  $^{19}\text{F}$ ), or Bruker AVIII HD 500 MHz (126 MHz for  $^{13}\text{C}$ , 471 MHz for  $^{19}\text{F}$ ) spectrometer(s). Spectra were referenced to residual solvent using either  $\text{CDCl}_3$  ( $^1\text{H}$  NMR:  $\delta$  7.26 ppm,  $^{13}\text{C}$  NMR:  $\delta$  77.36 ppm) or  $\text{C}_6\text{D}_6$  ( $^1\text{H}$  NMR:  $\delta$  7.15 ppm and  $^{13}\text{C}$  NMR:  $\delta$  128.60 ppm),  $^{19}\text{F}$  NMR spectra were referenced to added  $\text{C}_6\text{F}_6$  ( $^{19}\text{F}$  NMR:  $\delta$  -164.9 ppm). Chemical shifts are reported in part per million and the multiplicity is as indicated: s (singlet), d (doublet), t (triplet), q (quartet), p (pentet), m (multiplet), and br (broad). Coupling constant values are designated by  $J$  and are reported in Hertz. Integration of the products is provided. Analysis of products and starting materials by Gas Chromatography (GC) where indicated is performed using a Shimadzu GC-2010 Plus Gas Chromatograph or Shimadzu Nexis GC-2030 gas chromatograph with hydrogen as carrier gas with a flame ionization detector. The analysis by Gas Chromatography Mass Spectrometry (GC-MS) was performed on a Shimadzu GC-2010 Plus coupled with GC-MS QP2010SE or a Shimadzu GC-2010 Plus Gas chromatograph equipped with Shimadzu GCMS-QP2010 SE mass spectrometer. The analyte is separated by way of a SHRXI-5MS- 30 m x 0.25 mm x 0.25  $\mu\text{m}$  column using helium carrier gas; identification of the analyte is assisted by electron impact ionization. High Resolution-Mass Spectrometry (HR-MS) was performed in the Department of Chemistry at the University of Illinois at Urbana-Champaign and at the Mass Spec Facility at the University of Texas at Austin. All air-sensitive reactions involving the hydroamination reaction, unless otherwise indicated, were set-up with the aid of a glove box maintained under a nitrogen atmosphere.

### *Materials:*

Solvents used for extraction and column chromatography were reagent grade and used as received. Reaction solvents tetrahydrofuran (Fisher, unstabilized HPLC ACS grade), diethyl ether (Fisher, BHT stabilized ACS grade), methylene chloride (Fisher, unstabilized HPLC grade), dimethoxyethane (Fisher, certified ACS), toluene (Fisher, optima ACS grade), 1,4-dioxane (Fisher, certified ACS), acetonitrile (Fisher, HPLC grade), and hexanes (Fisher, ACS HPLC grade) were dried on a Pure Process Technology Glass Contour Solvent Purification System using activated Stainless Steel columns while following manufacture's recommendations for solvent preparation and dispensation unless otherwise noted. were distilled and

degassed by the freeze-pump-thaw method before use. All liquid aldehydes and amines were freshly distilled prior to use.

## B. Select Optimization

**Table S1.** Ligand screen

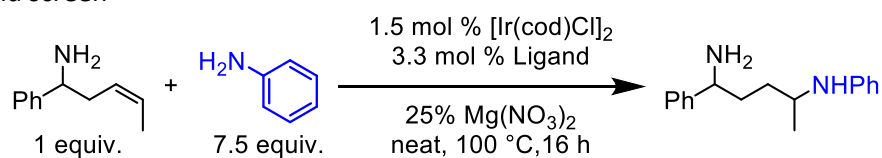

| Ligand            | GC yield (%) |
|-------------------|--------------|
| Dppb              | 0            |
| DPEphos           | 0            |
| Xantphos          | 0            |
| BINAP             | 78           |
| <i>tol</i> -BINAP | 80           |
| SEGPPOS           | 77           |
| DTBM-SEGPPOS      | 17           |

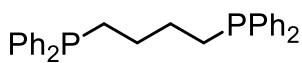

**dppb**

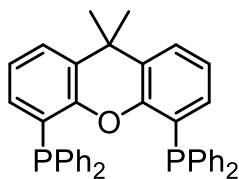

**Xantphos**

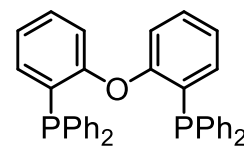

**DPEphos**

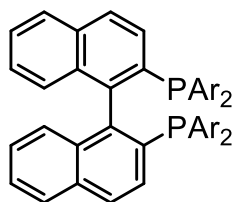

**BINAP** Ar = C<sub>6</sub>H<sub>5</sub>

***tol*-BINAP** Ar = 4-Me-C<sub>6</sub>H<sub>4</sub>

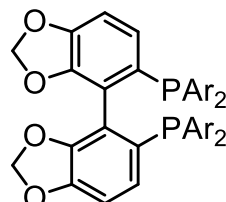

**SEGPPOS** Ar = C<sub>6</sub>H<sub>5</sub>

**DTBM-SEGPPOS** Ar = 3,5-tBu-4-MeO-C<sub>6</sub>H<sub>2</sub>

**Table S2.** Additive Screen

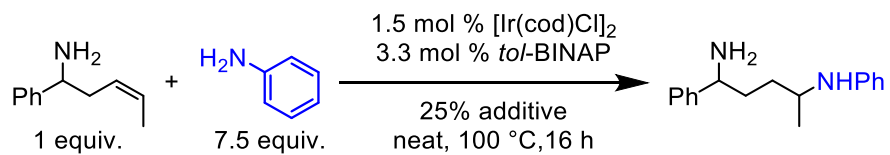

| Additive                          | GC yield (%) |
|-----------------------------------|--------------|
| None                              | 34           |
| LiNO <sub>3</sub>                 | 74           |
| Mg(NO <sub>3</sub> ) <sub>2</sub> | 80           |
| Mg(OTf) <sub>2</sub>              | 79           |
| MgCl <sub>2</sub>                 | 8            |
| AgNO <sub>3</sub>                 | 47           |
| NaBARf                            | 0            |

**Table S3.** Additive Screen for Cyclic Olefin

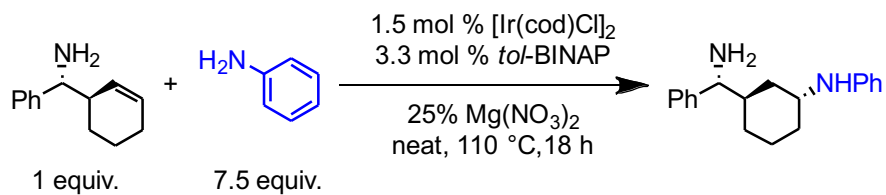

| Additive                              | In-situ Yield | d.r.         |
|---------------------------------------|---------------|--------------|
| KBr                                   | 20            | 0.46         |
| CaI <sub>2</sub>                      | 27            | 1.22         |
| LiNO <sub>3</sub>                     | 41            | 9.71         |
| MgSO <sub>4</sub>                     | 21            | 1.39         |
| Ca(NO <sub>3</sub> ) <sub>2</sub>     | 27            | 2.99         |
| KI                                    | 34            | 3.09         |
| NaI                                   | 40            | 6.38         |
| CaBr <sub>2</sub>                     | 18            | 1.10         |
| <b>Mg(NO<sub>3</sub>)<sub>2</sub></b> | 47            | <b>28.17</b> |
| CsI                                   | 34            | 4.59         |
| Li <sub>2</sub> SO <sub>4</sub>       | 20            | 1.34         |
| MgBr <sub>2</sub>                     | 21            | 1.60         |
| <b>ZnBr<sub>2</sub></b>               | 50            | <b>10.87</b> |
| K <sub>2</sub> SO <sub>4</sub>        | 20            | 1.44         |
| ZnI <sub>2</sub>                      | 47            | 4.24         |
| LiI                                   | 46            | 3.54         |

## C. Substrate Synthesis

General Procedure A: Synthesis of linear internal olefins

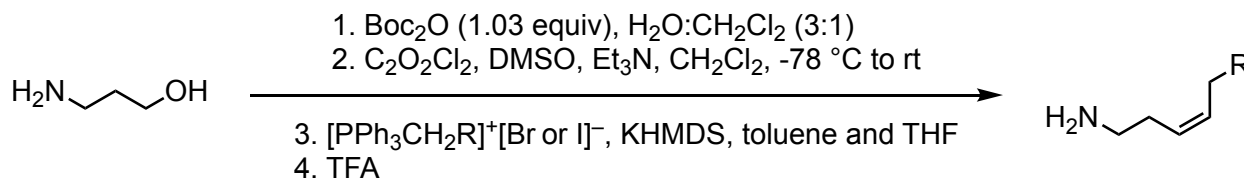

**Step 1.** 3-amino-1-propanol derivatives (1 equiv) were protected by adding di-*tert*-butyl-dicarbonate (1.03 equiv) to a biphasic mixture of deionized water (3 mL/mmol sm) and DCM (1 mL/mmol sm). This was stirred for 1-24 h, extracted twice with 30 mL dichloromethane, dried over brine and magnesium sulfate, and the solvent was removed *in vacuo*. These products were taken to the next step without further purification.

**Step 2.** The protected material was oxidized using a typical Swern oxidation condition. An oven-dried flask was placed under  $\text{N}_2$  and 2 mL dichloromethane/mmol starting material was added to it. This was chilled to  $-78\text{ }^\circ\text{C}$  and had 1.5 equiv oxalyl chloride added to it. 2.0 equiv dimethylsulfoxide (mixed 1:1 with dichloromethane to prevent freezing in the syringe) was added to this dropwise over five minutes. The solution was stirred for fifteen minutes at this temperature, and then a dichloromethane solution (2 mL/mmol) of the Boc amine was added to the solution over ten minutes. This was stirred for a further 30 minutes and 5 equiv trimethylamine was added to the reaction. The reaction was allowed to warm to room temperature overnight and quenched with 2 mL/mmol of saturated ammonium chloride solution and 1 mL/mmol of deionized water. The mixture was extracted twice with 40 mL dichloromethane, dried with sodium sulfate, and the solvent removed *in vacuo*. The aldehydes produced were mostly stable to column chromatography, however, generally, they were used without further purification. Note: purified yields ranged from 60-80% over 2 steps; purification was not found to improve yields for further reactions.

**Step 3.** The resulting aldehydes were then subjected to a Z-selective Wittig olefination. An oven-dried flask containing 2.2 equiv of the corresponding triphenylphosphonium bromide or iodide salt was cycled to a nitrogen atmosphere and chilled to  $0\text{ }^\circ\text{C}$ . To this was added 3 mL dry THF/mmol aldehyde, and 2.1 equiv KHMDS in toluene (0.7 M solution) slowly, producing bright red or orange suspensions. This was allowed to stir for 1-2 hours at this temperature. The aldehyde was dissolved in THF (2 mL/mmol) and added dropwise to the ylide solution. The reaction was allowed to warm up to rt overnight and quenched (allowing it to stir longer resulted in no further product formation, and in some cases degradation) using 2 mL/mmol starting material saturated ammonium chloride solution. The resulting suspension was extracted twice with 50 mL diethyl ether, loaded onto Celite, and columned using 25% ethyl acetate in hexanes. These columns generally did not remove all of the impurities, however, the goal was to remove most of the phosphine oxide and phosphine byproducts. These reactions consistently produced >20:1 Z-olefin, although with modest yields (30-50%).

**Step 4.** The Boc group was then removed to reveal the free internal Z-homoallylamine. This was accomplished by dissolving the starting olefin in 1.5 mL/mmol dichloromethane and chilling it to  $0\text{ }^\circ\text{C}$ . TFA was added (5 equiv) dropwise, usually inducing a stark color change. This was stirred at rt for 1.5 hours, and then chilled, 1.5 mL/mmol starting material deionized water added, 1.2 mL/mmol starting material 5 M NaOH added slowly, and a basic pH confirmed using pH test strips. This was extracted with 3 x 10 mL

dichloromethane, dried using sodium sulfate, and the solvent removed *in vacuo*. These products could be purified using distillation under reduced pressure (0.2-1 torr) to afford the pure *Z*-homoallyl amines in 25-70% yields.

*General Procedure B: Synthesis of Cyclic Internal Olefins*

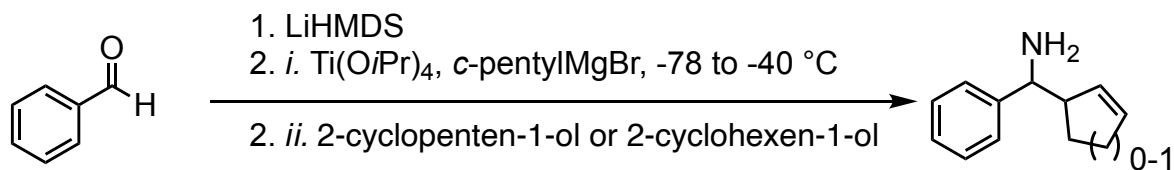

1.0 equiv of benzaldehyde was combined with 1.05 equiv LiHMDS in THF at 0 °C. This was warmed to room temperature overnight, concentrated by rotovap, and distilled (55 °C, 0.4 torr) to afford benzaldehyde trimethylsilyl imine in 61% yield.

The trimethylsilyl imine was put under a nitrogen atmosphere and dissolved in 8 mL/mmol diethyl ether. Then, 1.5 equiv titanium isopropoxide (neat) was added in a slow dropwise fashion. The reaction was stirred for 5 minutes, and chilled to -78 °C. To this was added slowly 3 equiv cyclopentylmagnesium chloride in THF. The mixture was stirred for 10 minutes and then warmed to a -40 °C where it stirred for an additional 1 hour. This solution was chilled to -78 °C, and then 1.3 equiv of the corresponding lithium alkoxide of the allylic alcohol (2-cyclopenten-1-ol or 2-cyclohexen-1-ol) was added (in 5 mL/mmol alkoxide of THF). This was allowed to warm to rt and stir over for two days. The reaction was quenched with 5 mL/mmol saturated sodium bicarbonate solution, stirred vigorously for 1 h, and filtered through a pad of Celite using sodium bicarbonate and diethyl ether to rinse. This was extracted with 3 x 50 mL portions of diethyl ether, dried over sodium sulfate, and concentrated *in vacuo*. The free amine was produced in > 20:1 d.r. and distilled under reduced pressure to afford the pure product. Yields were 50-65%.

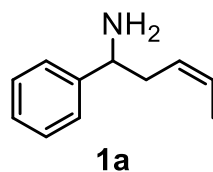

*General Procedure A*

*E:Z* ratio 1:5

$^1\text{H}$  NMR (500 MHz,  $\text{CDCl}_3$ ):  $\delta$  7.34 (qd,  $J = 8.3, 4.0$  Hz, 4H), 7.26 – 7.21 (m, 1H), 5.58 (dddd,  $J = 10.9, 8.4, 6.8, 5.2$  Hz, 1H), 5.38 (dddt,  $J = 11.4, 8.3, 6.6, 1.8$  Hz, 1H), 3.97 (dd,  $J = 7.7, 5.9$  Hz, 1H), 2.49 – 2.35 (m, 2H), 1.60 (dd,  $J = 6.8, 1.8$  Hz, 3H) ppm.

$^{13}\text{C}$  NMR (126 MHz,  $\text{CDCl}_3$ ):  $\delta$  146.46, 128.70, 127.25, 127.23, 127.00, 126.65jj, 56.34, 37.51, 13.34 ppm.

HR-MS (ESI-TOF)  $m/z$ :  $[\text{M}+\text{H}]^+$  calculated for  $\text{C}_{11}\text{H}_{16}\text{N}^+$ , 162.1283; found, 162.1385.



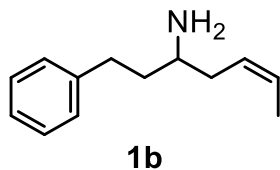

General Procedure A

*E:Z* < 1:10

$^1\text{H}$  NMR (500 MHz,  $\text{CDCl}_3$ ):  $\delta$  7.28 (t,  $J$  = 7.5 Hz, 2H), 7.22 – 7.14 (m, 3H), 5.61 (dtdd,  $J$  = 9.4, 6.8, 6.0, 1.5 Hz, 1H), 5.41 (dddt,  $J$  = 11.4, 8.5, 5.0, 1.8 Hz, 1H), 2.82 (ddd,  $J$  = 10.0, 8.0, 5.1 Hz, 1H), 2.80 – 2.72 (m, 1H), 2.65 (ddd,  $J$  = 13.7, 10.2, 6.1 Hz, 1H), 2.20 (dt,  $J$  = 13.4, 6.2 Hz, 1H), 2.11 (dt,  $J$  = 14.7, 7.9 Hz, 1H), 1.78 (dddd,  $J$  = 15.1, 7.2, 6.1, 4.9 Hz, 1H), 1.82-1.75 (m, 1H), 1.64 (dq,  $J$  = 7.6, 1.1 Hz, 3H), 1.41 (s, 2H) ppm.

$^{13}\text{C}$  NMR (126 MHz,  $\text{CDCl}_3$ ):  $\delta$  142.66, 128.71, 128.70, 127.49, 126.82, 126.10, 51.38, 39.72, 35.82, 33.09, 13.44.

HR-MS (ESI-TOF)  $m/z$ :  $[\text{M}+\text{H}]^+$  jcalculated for  $\text{C}_{13}\text{H}_{20}\text{N}^+$ , 190.1596; found, 190.1597.

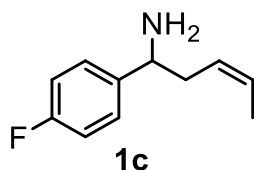

General Procedure A

*E:Z* = 6:1

$^1\text{H}$  NMR (400 MHz,  $\text{CDCl}_3$ ):  $\delta$  7.31 (dd,  $J$  = 8.7, 5.5 Hz, 2H), 7.00 (t,  $J$  = 8.8 Hz, 2H), 5.64 – 5.46 (m, 1H), 5.40 – 5.24 (m, 1H), 3.96 (dd,  $J$  = 6.0, 5.8 Hz, 1H), 2.37 (qt,  $J$  = 13.4, 6.4 Hz, 2H), 1.64 (s, 2H), 1.61 – 1.51 (m, 3H) ppm.

$^{13}\text{C}$  NMR (101 MHz,  $\text{CDCl}_3$ ):  $\delta$  161.92 (d,  $J^{CF}$  = 244.5 Hz), 141.73 (d,  $J^{CF}$  = 3.3 Hz), 127.97 (d,  $J^{CF}$  = 8.0 Hz), 127.01, 126.71, 115.18 (d,  $J^{CF}$  = 21.1 Hz), 55.45, 37.37, 13.10 ppm.

$^{19}\text{F}$  NMR (376 MHz,  $\text{CDCl}_3$ ):  $\delta$  -119.38 (tt,  $J$  = 8.2, 5.1 Hz) ppm.

HR-MS (ESI-TOF)  $m/z$ :  $[\text{M}+\text{H}]^+$  calculated for  $\text{C}_{11}\text{H}_{15}\text{FN}^+$ , 180.2459; found, 180.1190.

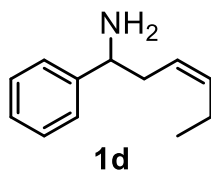

## General Procedure A

*E:Z* = 1:5

<sup>1</sup>H NMR (500 MHz, CDCl<sub>3</sub>): δ 7.36 – 7.31 (m, 4H), 7.26 – 7.21 (m, 1H), 5.53 – 5.44 (m, 1H), 5.35 – 5.28 (m, 1H), 3.96 (dd, *J* = 7.6, 6.0 Hz, 1H), 2.45 – 2.36 (m, 2H), 2.03 (dddd, *J* = 14.6, 7.3, 5.5, 3.7 Hz, 2H), 1.52 (s, 2H), 0.92 (t, *J* = 7.5 Hz, 3H) ppm.

<sup>13</sup>C NMR (126 MHz, CDCl<sub>3</sub>): δ 146.26, 134.57, 128.48, 127.03, 126.46, 125.45, 56.22, 37.61, 20.86, 14.35.

HR-MS (ESI-TOF) *m/z*: [M+H]<sup>+</sup> calculated for C<sub>12</sub>H<sub>18</sub>N, 176.1439; found, *z* 176.1440.

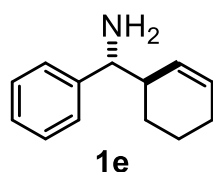

## General Procedure B

d.r. > 20:1

<sup>1</sup>H NMR (500 MHz, CDCl<sub>3</sub>): δ 7.38 – 7.30 (m, 4H), 7.29 – 7.23 (m, 1H), 5.85 (bs, 2H), 3.77 (d, *J* = 7.3 Hz, 1H), 2.38 (dddd, *J* = 10.8, 8.4, 5.7, 2.2 Hz, 1H), 2.00 (ddt, *J* = 8.6, 4.7, 2.1 Hz, 2H), 1.72 (dtd, *J* = 13.9, 6.7, 5.6, 3.9 Hz, 1H), 1.51 (tdd, *J* = 10.1, 7.0, 3.1 Hz, 4H), 1.35 – 1.25 (m, 1H) ppm.

<sup>13</sup>C NMR (126 MHz, CDCl<sub>3</sub>): δ 145.82, 129.82, 128.58, 128.10, 127.13, 127.09, 60.70, 43.35, 27.23, 25.67, 21.83 ppm.

HR-MS (ESI-TOF) *m/z*: [M+H]<sup>+</sup> calculated for C<sub>13</sub>H<sub>18</sub>N<sup>+</sup>, 188.1439; found, 188.1445.

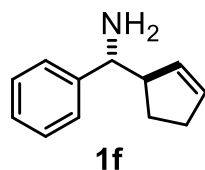

## General Procedure B

d.r. ~ 14:1

<sup>1</sup>H NMR (500 MHz, CDCl<sub>3</sub>): δ 7.35 – 7.30 (m, 4H), 7.24 (dtd, *J* = 8.5, 4.4, 2.2 Hz, 1H), 5.88 (dq, *J* = 5.5, 2.2 Hz, 1H), 5.82 – 5.78 (m, 1H), 3.75 (dd, *J* = 7.3, 1.1 Hz, 1H), 3.05 – 2.97 (m, 1H), 2.38 – 2.19 (m, 2H), 1.87 – 1.75 (m, 1H), 1.55 (dddd, *J* = 13.2, 9.1, 6.5, 5.3 Hz, 1H), 1.50 (bs, 2H) ppm.

$^{13}\text{C}$  NMR (126 MHz,  $\text{CDCl}_3$ ):  $\delta$  146.15, 133.51, 131.63, 128.59, 127.12, 127.08, 60.89, 54.11, 32.52, 27.55 ppm.

HR-MS (ESI-TOF)  $m/z$ :  $[\text{M}+\text{H}]^+$  calculated for  $\text{C}_{12}\text{H}_{16}\text{N}$ , 174.1283; found, 174.1277.

## D. General Hydroamination Procedure and Product Characterization

### 1,4- Selective General Procedure C for internal olefins

To a 4 mL vial equipped with a stirbar was added  $[\text{Ir}(\text{cod})\text{Cl}]_2$  (2.01 mg, 1.5 mol %), *tol*-BINAP (4.48 mg, 3.3 mol %),  $\text{Mg}(\text{NO}_3)_2$  (7.4 mg, 0.05 mmol, 0.25 equiv), homoallylic amine (0.2 mmol, 1.0 equiv) and aryl amine (1.5 mmol, 7.5 equiv). The 4 mL vial was sealed with a Teflon cap, removed from nitrogen-filled glove box, and heated to 100 °C for 16 h while stirring. The crude reaction was purified directly by column chromatography (eluent: ramp from 97% DCM:3%  $\text{NH}_4\text{OH}$ : 0% MeOH to 92% DCM:3%  $\text{NH}_4\text{OH}$ :5% MeOH).

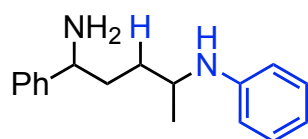

**3**  
60% yield  
2.0:1 dr

### N4,1-diphenylpentane-1,4-diamine (3)

The product was synthesized according to General Procedure C. This product (60%, 0.12 mmol) was isolated as a 2:1 mixture of diastereomers, with > 20:1 selectivity over the 1,3 and 1,5 diamine product as a 2:1 mixture of diastereoisomers.

$^1\text{H}$  NMR (500 MHz,  $\text{CDCl}_3$ ):  $\delta$  7.40 – 7.30 (m, 4H), 7.29 – 7.23 (m, 1H), 7.16 (t,  $J$  = 7.8 Hz, 2H), 6.68 (td,  $J$  = 7.4, 1.4 Hz, 1H), 6.55 (d,  $J$  = 8.1 Hz, 2H), 3.90 (t,  $J$  = 6.9 Hz, 1H), 3.51 – 3.42 (m, 1H), 1.91 – 1.73 (m, 2H), 1.71 – 1.61 (m, 1H, *major*), 1.59 – 1.52 (m, 0.5 H, *minor*), 1.51 – 1.43 (m, 0.5 H, *minor*), 1.42–1.31 (m, 1H, *major*) 1.17 (d,  $J$  = 6.4, 2.2 Hz, 3H) ppm.

$^{13}\text{C}$  NMR (126 MHz,  $\text{CDCl}_3$ ):  $\delta$  147.86, 146.62, 129.59, 128.86, 127.35, 126.62, 117.18, 113.40, 56.71, 48.83, 36.33, 34.33, 21.16 ppm.

HR-MS (ESI-TOF)  $m/z$ :  $[\text{M}+\text{H}]^+$  calculated for  $\text{C}_{17}\text{H}_{23}\text{N}_2$ , 255.1861; found, 255.1864.

The diastereoisomeric ratio was determined by  $^1\text{H}$  NMR; one of the  $\text{CH}_2$  groups separate.

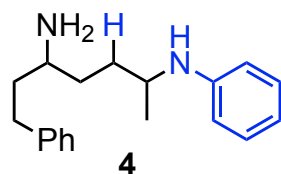

**4**  
74% yield  
2:1 dr

#### **N2,7-diphenylheptane-2,5-diamine (4)**

The product was synthesized according to General Procedure C. This product (74%, 0.15 mmol) was isolated at 90 °C as a 2:1 mixture of diastereomers (approximated by  $^{13}\text{C}$  NMR, no peaks resolved in the  $^1\text{H}$  NMR), with > 20:1 selectivity over the 1,3 and 1,5 diamine product.

$^1\text{H}$  NMR (500 MHz,  $\text{CDCl}_3$ ):  $\delta$  7.33 – 7.29 (m, 2H), 7.24 – 7.15 (m, 5H), 6.69 (t,  $J$  = 7.2 Hz, 1H), 6.59 (d,  $J$  = 8.0 Hz, 2H), 3.48 (h,  $J$  = 6.1 Hz, 1H), 2.86 – 2.72 (m, 3H), 2.66 (dddd,  $J$  = 13.5, 9.6, 6.3, 2.7 Hz, 2H), 1.87 – 1.75 (m, 2H), 1.73 – 1.41 (m, 6H), 1.21 (d,  $J$  = 6.4 Hz, 3H) ppm.

$^{13}\text{C}$  NMR (126 MHz,  $\text{CDCl}_3$ ):  $\delta$  147.93, 147.91 (minor), 142.48, 129.65, 128.74, 128.68, 126.15, 117.27 (minor), 117.24, 113.46 (minor), 113.44, 51.30, 51.28 (minor), 49.03, 48.95 (minor), 40.08, 34.61, 33.89, 32.89, 32.85 (minor), 21.31, 21.24 (minor) ppm.

HR-MS (ESI-TOF)  $m/z$ :  $[\text{M}+\text{H}]^+$  calculated for  $\text{C}_{19}\text{H}_{27}\text{N}_2$ , 283.2174; found mass, 283.2163.

The only two signals that showed baseline separation are shown below and support a d.r. of approximately 2:1.

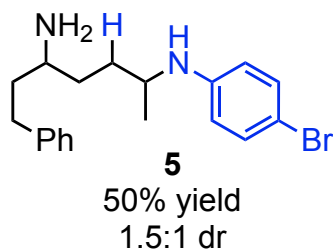

#### **N2-(4-bromophenyl)-7-phenylheptane-2,5-diamine (5)**

The product was synthesized according to General Procedure C. This product (50%, 0.10 mmol) was isolated as a 1.5:1 mixture of diastereomers (approximated by  $^{13}\text{C}$  NMR; there were no separate peaks in the  $^1\text{H}$  NMR), with > 20:1 selectivity over the 1,3 and 1,5 diamine product.

$^1\text{H}$  NMR (500 MHz,  $\text{CDCl}_3$ ):  $\delta$  7.31 – 7.25 (m, 2H), 7.24 – 7.15 (m, 5H), 6.43 (d,  $J$  = 8.8 Hz, 1H), 3.40 (hept,  $J$  = 7.2, 6.7 Hz, 1H), 2.73 (dtd,  $J$  = 16.5, 8.7, 7.6, 3.4 Hz, 2H), 2.62 (ddd,  $J$  = 13.6, 10.0, 6.3 Hz, 1H), 1.80 – 1.70 (m, 1H), 1.67 – 1.31 (m, 5H), 1.17 (dd,  $J$  = 6.3, 1.2 Hz, 3H) ppm.

$^{13}\text{C}$  NMR (126 MHz,  $\text{CDCl}_3$ ):  $\delta$  146.70, 146.68 (minor), 142.24, 132.07, 128.53, 128.45, 125.94, 114.73 (minor), 114.71, 108.37 (minor), 108.35 (major), 51.02 (major), 50.99 (minor), 48.93 (minor), 48.84 (major), 40.07 (minor), 40.02 (major), 34.46 (minor), 34.40 (major), 33.52 (major), 33.45 (minor), 32.69 (minor), 32.64 (major), 20.90 (major), 20.84 (minor) ppm.

HR-MS (ESI-TOF)  $m/z$ :  $[\text{M}+\text{H}]^+$  calculated for  $\text{C}_{19}\text{H}_{26}\text{N}_2\text{Br}$ , 361.1279; found, 361.1274.

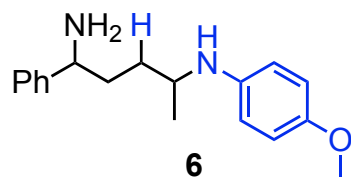

**6**  
49% yield  
1.5:1 dr

#### N4-(4-methoxyphenyl)-1-phenylpentane-1,4-diamine (6)

The product was synthesized according to General Procedure C. This product (49%, 0.098 mmol) was isolated as a 1.5:1 mixture of diastereomers, with > 20:1 selectivity over the 1,3 and 1,5 diamine product.

$^1\text{H}$  NMR (500 MHz,  $\text{CDCl}_3$ ):  $\delta$  7.31 (m, 4H), 7.26 – 7.20 (m, 1H), 6.75 (d,  $J$  = 8.9 Hz, 2), 6.50 (d,  $J$  = 8.9 Hz, 2H), 3.88 (t,  $J$  = 6.9 Hz, 1H), 3.74 (s, 3H), 3.39 – 3.30 (m, 1H), 2.27 (br s, 2H), 1.60 (ddd,  $J$  = 17.2, 11.1, 5.6 Hz, 0.6H, 1H major), 1.55 – 1.37 (m, 0.9H, 2H minor), 1.36 – 1.27 (m, 1H, major), 1.2 (overlapping d,  $J$  = 6.4 Hz, 3H, major and minor) ppm.

$\delta$   $^{13}\text{C}$  NMR (126 MHz,  $\text{CDCl}_3$ ):  $\delta$  151.96, 146.27 (minor), 146.19 (major), 141.88, 128.65, 127.17, 126.44, 115.07, 114.82 (major), 114.79 (minor), 56.50 (major), 56.46 (minor) 55.96, 49.70 (minor), 49.68 (major), 36.00 (major), 35.98 (minor) 34.11 (major), 34.04 (minor), 20.99 (minor), 20.97 (major) ppm.

HR-MS (ESI-TOF)  $m/z$ :  $[\text{M}+\text{H}]^+$  calculated for  $\text{C}_{18}\text{H}_{25}\text{N}_2\text{O}$ , 285.1967; found, 285.1965.

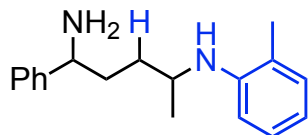

**7**  
29% yield  
1.6:1 dr

#### 1-phenyl-N4-(o-tolyl)pentane-1,4-diamine (7)

The product was synthesized according to General Procedure C. This product (29%, 0.058 mmol) was isolated as a 1.6:1 mixture of diastereomers, with > 20:1 selectivity over the 1,3 and 1,5 diamine product.

$^1\text{H}$  NMR (500 MHz,  $\text{CDCl}_3$ ):  $\delta$  7.40 – 7.30 (m, 4H), 7.28 – 7.25 (m, 1H), 7.10 (t,  $J$  = 7.7 Hz, 1H), 7.05 (d,  $J$  = 7.3 Hz, 1H), 6.63 (t,  $J$  = 7.5 Hz, 1H), 6.55 (d,  $J$  = 8.2 Hz, 1H), 3.97 – 3.89 (m, 1H), 3.57 – 3.47 (m, 1H), 2.73 (bs, 3H), 2.11 (s, 3H), 1.92 – 1.75 (m, 2H), 1.73 – 1.63 (m, 1H, major), 1.63 – 1.44 (m, 1H, minor 2H), 1.41 – 1.33 (m, 1H, major), 1.19 (d,  $J$  = 6.3, Hz, 3H) ppm.

$^{13}\text{C}$  NMR (126 MHz,  $\text{CDCl}_3$ ):  $\delta$  145.47, 130.37, 128.76, 127.38, 127.23, 126.52, 121.83, 121.82, 116.47, 110.19 (major), 110.13 (minor), 56.45 (major), 56.42 (minor), 48.43 (minor), 48.41 (major), 35.66 (major), 35.61 (minor), 34.09 (major), 34.00 (minor), 21.17 (minor), 21.12 (major), 17.75 (major), 17.73 (minor) ppm.

HR-MS (ESI-TOF)  $m/z$ :  $[\text{M}+\text{H}]^+$  calculated for  $\text{C}_{18}\text{H}_{25}\text{N}_2$ , 269.2018; found, 269.2017

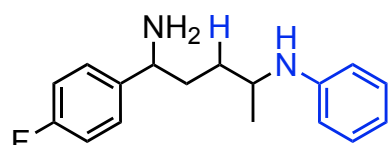

**8**  
60% yield  
1.7:1 dr

#### 1-(4-fluorophenyl)-N4-phenylpentane-1,4-diamine (**8**)

The product was synthesized according to General Procedure C. This product (60%, 0.12 mmol) was isolated as a 1.7:1 mixture of diastereomers, with > 20:1 selectivity over the 1,3 and 1,5 diamine product.

$^1\text{H}$  NMR (400 MHz,  $\text{CDCl}_3$ ):  $\delta$  7.33 – 7.20 (m, 2H), 7.14 (dd,  $J$  = 8.5, 7.2 Hz, 2H), 7.00 (td,  $J$  = 8.6, 6.2 Hz, 2H), 6.66 (td,  $J$  = 7.3, 1.0 Hz, 1H), 6.53 (d,  $J$  = 7.4 Hz, 2H), 3.89 (t,  $J$  = 6.8 Hz, 1H), 3.43 (h,  $J$  = 6.3 Hz, 1H), 2.67 (bs, 2H), 1.91 – 1.64 (m, 2H), 1.64 – 1.53 (m, 1H, major), 1.52-1.36 (m, 2H, minor), 1.36-1.22 (m, 1H, major) 1.14 (d,  $J$  = 6.3 Hz, 3H, minor) 1.13 (d,  $J$  = 6.3 Hz, 3H, major) ppm.

$^{13}\text{C}$  NMR (101 MHz,  $\text{CDCl}_3$ ):  $\delta$  162.01 (d,  $J$  = 245.0 Hz) (overlapping peaks), 147.56 (overlapping peaks), 141.17 (overlapping peaks), 129.40 (overlapping peaks), 128.07 (d,  $J$  = 7.9 Hz) (overlapping peaks), 117.06 (overlapping peaks), 115.43 (d,  $J$  = 21.3 Hz) (overlapping peaks), 113.21 (major), 113.20 (minor), 55.77 (major), 55.74 (minor), 48.57 (minor), 48.50 (major), 35.78 (overlapping peaks), 33.88 (major), 33.73 (minor), 20.94 (minor), 20.93 (major).

$^{19}\text{F}$  NMR (376 MHz,  $\text{CDCl}_3$ ):  $\delta$  -118.43 (overlapping peaks) ppm.

HR-MS (ESI-TOF)  $m/z$ :  $[\text{M}+\text{H}]^+$  calculated for  $\text{C}_{17}\text{H}_{21}\text{FN}_2$ , 273.1762; found, 273.1759.

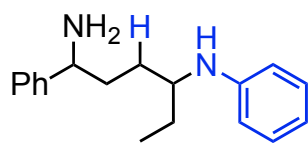

**9**  
25% yield  
2.5:1 dr

#### N4,1-diphenylhexane-1,4-diamine (**9**)

The product was synthesized according to General Procedure C. This product (25%, 0.050 mmol) was isolated as a 2.2:1 mixture of diastereomers, with > 20:1 selectivity over the 1,3 and 1,5 diamine product.

$^1\text{H}$  NMR (500 MHz,  $\text{CDCl}_3$ ):  $\delta$  7.38 – 7.24 (m, 5H), 7.15 (t,  $J$  = 7.8 Hz, 2H), 6.65 (t,  $J$  = 7.3 Hz, 1H), 6.54 (d,  $J$  = 8.0 Hz, 2H), 3.90 (t,  $J$  = 7.1 Hz, 1H), 3.28 (p,  $J$  = 6.1 Hz, 1H), 2.84 (br s, 3H), 1.90 – 1.69 (m, 2H), 1.68 – 1.29 (m, 4H), 0.89 (t,  $J$  = 7.5 Hz, 3H, major), 0.88 (t,  $J$  = 7.5 Hz, 3H, minor).

$^{13}\text{C}$  NMR (126 MHz,  $\text{CDCl}_3$ ):  $\delta$  148.14 (major), 148.13 (minor), 145.50 (overlapping peaks), 129.40 (overlapping peaks), 128.72 (overlapping peaks), 127.36 (minor), 127.33 (major), 126.54 (minor), 126.48 (major), 116.78 (minor), 116.76 (major), 113.05 (major), 113.03 (minor), 56.46 (minor), 54.21 (minor),

54.18 (major), 35.51 (major), 35.34 (minor), 31.32 (major), 31.04 (minor), 27.49 (minor), 27.47 (major), 10.22 (minor), 10.13 (major).

HR-MS (ESI-TOF)  $m/z$ :  $[M+H]^+$  calculated for  $C_{18}H_{25}N_2^+$ , 269.2012; found mass, 269.2019

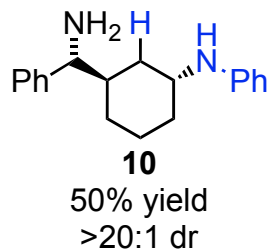

**(+/-) *N*-((*trans*)-3-(amino(phenyl)methyl)cyclohexyl)aniline (10)**

This product (50%, 0.10 mmol) was isolated as a mixture of diastereomers with predominantly the shown diastereomer (>20:1), with > 20:1 selectivity over the 1,3 and 1,5 diamine product.

$^1H$  NMR (500 MHz,  $CDCl_3$ ):  $\delta$  7.40 – 7.32 (m, 2H), 7.32 – 7.24 (m, 3H), 7.19 (t,  $J = 7.4$  Hz, 2H), 6.69 (t,  $J = 7.3$  Hz, 1H), 6.64 (d,  $J = 7.3$  Hz, 2H), 3.82 – 3.76 (m, 1H), 3.69 (d,  $J = 7.9$  Hz, 1H), 2.10 (d,  $J = 13.3$  Hz, 1H), 1.85 (tdt,  $J = 11.3, 7.6, 3.6$  Hz, 1H), 1.81 – 1.74 (m, 1H), 1.73 – 1.40 (m, 7H), 1.01 – 0.89 (m, 1H) ppm.

$^{13}C$  NMR (126 MHz,  $CDCl_3$ ):  $\delta$  147.35, 145.02, 129.30, 128.31, 127.10, 127.04, 116.83, 113.03, 60.81, 47.50, 39.78, 33.99, 30.19, 28.89, 20.43 ppm.

HR-MS (ESI-TOF)  $m/z$ :  $[M+H]^+$  calculated for  $C_{19}H_{25}N_2^+$ , 281.2012; found mass, 281.2018

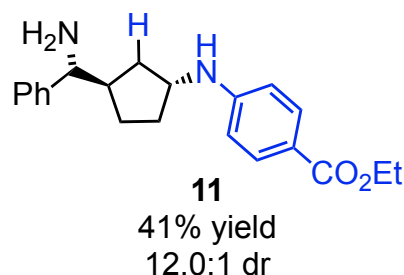

**ethyl 4-(((1R,3R)-3-((R)-amino(phenyl)methyl)cyclopentyl)amino)benzoate (11)**

This product (41%, 0.082 mmol) was isolated as a mixture of diastereomers with predominantly the shown diastereomer (12:1 selectivity), with > 20:1 selectivity over the 1,3 and 1,5 diamine product. (note: initial d.r. of substrate is 14:1)

$^1H$  NMR (500 MHz,  $CDCl_3$ ):  $\delta$  7.87 (d,  $J = 8.7$  Hz, 2H), 7.39 – 7.30 (m, 4H), 7.30 – 7.23 (m, 1H), 6.54 (d,  $J = 8.7$  Hz, 2H), 4.33 (q,  $J = 7.1$  Hz, 2H), 3.94 (m, 1H), 3.71 (d,  $J = 8.9$  Hz, 1H), 2.38 (h,  $J = 9.5$  Hz, 1H), 2.21 – 1.86 (m, 5H), 1.53 (dtd,  $J = 10.6, 7.2, 3.1$ , 1H), 1.44 (ddt,  $J = 13.4, 8.0, 4.2$  Hz, 1H), 1.37 (t,  $J = 7.2$  Hz, 3H), 1.31 – 1.23 (m, 1H).

$^{13}C$  NMR (126 MHz,  $CDCl_3$ ):  $\delta$  167.22, 151.61, 145.56, 131.78, 128.80, 127.55, 127.08, 118.72, 112.11, 61.73, 60.47, 54.09, 46.61, 37.92, 33.75, 29.10, 14.80.



HR-MS (ESI-TOF)  $m/z$ :  $[M+H]^+$  calculated for  $C_{21}H_{27}N_2O_2$ , 339.2073; found mass, 339.2071

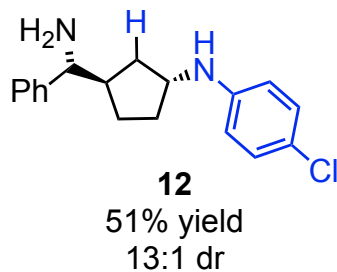

### N-(3-(amino(phenyl)methyl)cyclopentyl)-4-chloroaniline (**12**)

This product (51%, 0.10 mmol) was isolated as a mixture of diastereomers with predominantly the shown diastereomer (13:1 selectivity), with > 20:1 selectivity over the 1,3 and 1,5 diamine product (note: initial d.r. of substrate is 14:1).

$^1H$  NMR (500 MHz,  $CDCl_3$ ):  $\delta$  7.40 – 7.31 (m, 3H), 7.30 – 7.23 (m, 2H), 7.12 (d,  $J$  = 8.8 Hz, 2H), 6.51 (d,  $J$  = 8.8 Hz, 2H), 3.84 (qd,  $J$  = 6.7, 3.7 Hz, 1H), 3.69 (d,  $J$  = 8.9 Hz, 1H), 2.72 – 2.29 (bs, 3H), 2.37 (h,  $J$  = 9.5 Hz, 1H), 2.13 (dddd,  $J$  = 12.7, 8.8, 6.7, 3.6 Hz, 1H), 1.95 – 1.80 (m, 2H), 1.51 (dtd,  $J$  = 11.1, 7.4, 3.4 Hz, 1H), 1.41 (dtd,  $J$  = 13.2, 8.2, 5.5 Hz, 1H), 1.31 – 1.18 (m, 1H).

$^{13}C$  NMR (126 MHz,  $CDCl_3$ ):  $\delta$  146.59, 145.64, 129.31, 128.78, 127.51, 127.09, 121.90, 114.51, 61.80, 54.58, 46.60, 37.91, 33.78, 29.17.

HR-MS (ESI-TOF)  $m/z$ :  $[M+H]^+$  calculated for  $C_{18}H_{22}N_2Cl^+$ , 301.1466; found mass, 301.1465

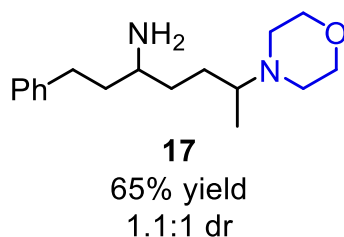

### 6-morpholino-1-phenylheptan-3-amine (**17**)

The product was synthesized according to General Procedure C. This product (65%, 0.13 mmol) was isolated as a 1.1:1 mixture of diastereomers, with > 20:1 selectivity over the 1,3 and 1,5 diamine product.

$^1H$  NMR (500 MHz,  $CDCl_3$ ):  $\delta$  7.31 – 7.26 (m, 2H), 7.19 (d,  $J$  = 7.8 Hz, 3H), 3.77 – 3.64 (m, 4H), 2.78-2.71 (m, 2H), 2.69 – 2.58 (m, 1H), 2.57-2.51 (m, 2H), 2.51 – 2.40 (m, 3H), 2.15 – 2.01 (bs, 2H), 1.76 (m, 1H), 1.69 – 1.48 (m, 2H), 1.45 – 1.25 (m, 3H), 0.98 (dd,  $J$  = 6.6, 1.7 Hz, 3H) ppm. *Note. This was isolated as a 1.1:1 mixture of diastereoisomers; the overlapping signals complicated analysis.*

$^{13}C$  NMR (126 MHz,  $CDCl_3$ ):  $\delta$  142.35 (overlapping peaks), 128.53 (overlapping peaks), 128.48 (overlapping peaks), 125.94 (overlapping peaks), 67.54, 67.52, 59.64, 59.61, 51.24, 51.18, 49.00, 48.95, 39.87, 39.80, 35.09, 35.03, 32.75, 32.72, 30.04, 30.00, 14.30 (overlapping peaks) ppm. *Note. This was isolated as a 1.1:1*

mixture of diastereoisomers; the carbon signals typically come in pairs. We were unable to definitively assign major/minor isomers.

HR-MS (ESI-TOF)  $m/z$ :  $[M+H]^+$  calculated for  $C_{17}H_{29}N_2O^+$ , 277.2274; found mass, 277.2267.

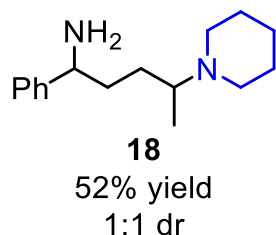

#### 1-phenyl-4-(piperidin-1-yl)pentan-1-amine (**18**)

The product was synthesized according to General Procedure C. This product (52%, 0.13 mmol) was isolated as a 5:1 mixture of diastereomers, with > 20:1 selectivity over the 1,3 and 1,5 diamine product.

$^1H$  NMR (400 MHz,  $CDCl_3$ ):  $\delta$  7.34 – 7.30 (m, 4H), 7.25 – 7.21 (m, 1H), 3.85 (t,  $J$  = 6.7 Hz, 1H), 2.56 (m, 1H), 2.43 (m, 4H), 2.01 (s, 2H), 1.77 – 1.52 (m, 7H), 1.41 (q,  $J$  = 5.9 Hz, 2H), 1.22 – 1.10 (m, 1H), 0.93 (d,  $J$  = 6.6 Hz, 3H).

$^{13}C$  NMR (101 MHz,  $CDCl_3$ ):  $\delta$  146.81, 128.59, 127.02, 126.45, 59.93, 56.73, 54.74, 49.45, 37.18, 30.52, 29.83, 26.36, 25.99, 24.93, 14.06, 13.97. *Note. This was isolated as a 5:1 mixture of diastereoisomers, the signals for the major isomer are provided.*

HR-MS (ESI-TOF)  $m/z$ :  $[M+H]^+$  calculated for  $C_{16}H_{27}N_2^+$ , 247.2169; found mass, 247.2176.

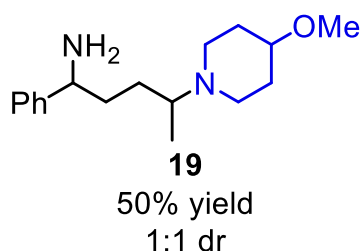

#### 4-(4-methoxypiperidin-1-yl)-1-phenylpentan-1-amine (**19**)

The product was synthesized according to General Procedure C. This product (50%, 0.1 mmol) was isolated as a 1.4:1 mixture of diastereomers, with > 20:1 selectivity over the 1,3 and 1,5 diamine product.

$^1H$  NMR (500 MHz,  $CDCl_3$ ):  $\delta$  7.36 – 7.26 (m, 4H), 7.26 – 7.20 (m, 1H), 3.90 – 3.82 (m, 1H), 3.31 (s, 3H), 3.24 – 3.16 (m, 1H), 2.74 – 2.59 (m, 3H), 2.38 (t,  $J$  = 9.1 Hz, 1H), 2.32 – 2.12 (m, 3H), 1.94 (bs, 2H), 1.71 (m, 2H), 1.58 (m, 2H), 1.39 – 1.33 (m, 1H (0.47H, minor)), 1.22 – 1.11 (m, 1H (0.75H, major)), 0.96 (m, 3H).

$^{13}C$  NMR (101 MHz,  $CDCl_3$ ):  $\delta$  146.65 (minor), 146.55 (major), 128.60 (overlapping peaks), 127.07 (major), 127.03 (minor), 126.42 (major), 126.38 (minor), 59.38 (overlapping peaks), 56.62 (major), 56.43 (minor),

55.63 (overlapping peaks), 44.81 (major), 44.74 (minor), 36.93 (major), 36.84 (minor), 31.04 (broad, overlapping peaks), 30.95 (broad, overlapping peaks), 30.62 (major), 30.43 (minor), 29.81 (minor), 14.11 (major), 14.03 (minor).

HR-MS (ESI-TOF)  $m/z$ :  $[M+H]^+$  calculated for  $C_{17}H_{28}N_2O^+$ , 277.2274; found mass, 277.2277

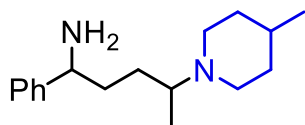

**20**

51% yield

1.1:1 dr

#### 4-(4-methylpiperidin-1-yl)-1-phenylpentan-1-amine (20)

The product was synthesized according to General Procedure C. This product (51%, 0.11 mmol) was isolated as a 1.1:1 mixture of diastereomers, with > 20:1 selectivity over the 1,3 and 1,5 diamine product.

$^1H$  NMR (500 MHz,  $CDCl_3$ ):  $\delta$  7.34 – 7.27 (m, 4H), 7.21 (d,  $J$  = 17.1 Hz, 1H), 3.84 (m, 1H), 2.72 – 2.61 (m, 2H), 2.54 (m, 1H), 2.23 (m, 1H), 2.11-1.90 (m, 2H), 1.74 – 1.54 (m, 5H), 1.52 – 1.06 (m, 5H), 0.92 (t,  $J$  = 6.7 Hz, 3H), 0.88 (d,  $J$  = 6.3 Hz, 3H). *Note. This was isolated as a 1.1:1 mixture of diastereoisomers; the overlapping signals complicated analysis.*

$^{13}C$  NMR (126 MHz,  $CDCl_3$ ):  $\delta$  146.76, 146.67, 128.51 (overlapping signals), 126.95, 126.92, 126.39, 126.35, 59.48, 59.43, 56.67, 56.49, 50.60, 50.51, 46.92, 46.82, 37.11, 37.06, 34.80, 34.74, 34.62, 34.57, 31.27, 31.24, 30.60, 30.59, 22.04 (overlapping signals), 14.09, 14.00. *Note. This was isolated as a 1.1:1 mixture of diastereoisomers; the carbon signals typically come in pairs. We were unable to definitively assign major/minor isomers.*

HR-MS (ESI-TOF)  $m/z$ :  $[M+H]^+$  calculated for  $C_{17}H_{29}N_2^+$ , 261.2325; found mass, 261.2326

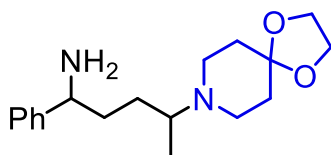

**21**

39% yield

1:1 dr

#### 1-phenyl-4-(1,4-dioxaspiro[4.5]decan-8-yl)pentan-1-amine (21)

The product was synthesized according to General Procedure C. This product (39%, 0.079 mmol) was isolated as a 1.1:1 mixture of diastereomers, with > 20:1 selectivity over the 1,3 and 1,5 diamine product.

$^1\text{H}$  NMR (400 MHz,  $\text{CDCl}_3$ ):  $\delta$  7.33 – 7.28 (m, 4H), 7.22 (m, 1H), 3.92 (m, 4H), 3.84 (m, 1H), 2.93 (m, 1H), 2.66 – 2.50 (m, 4H), 2.50 – 2.39 (m, 2H), 1.90 (bs, 2H), 1.80 – 1.63 (m, 4H), 1.62-1.51 (m, 1H(0.7H)), 1.46 – 1.29 (m, 2H (1.1H)), 1.22 – 1.09 (m, 1H (0.6H)), 0.92 (d,  $J$  = 6.6 Hz, 3H (1.5H)), 0.91 (d,  $J$  = 6.6 Hz, 3H (1.5H)). *Note. This was isolated as a 1.1:1 mixture of diastereoisomers; the overlapping signals complicated analysis.*

$^{13}\text{C}$  NMR (101 MHz,  $\text{CDCl}_3$ ):  $\delta$  146.66, 146.57, 128.61 (overlapping signals), 127.07, 127.05, 126.43, 126.40, 107.66, 107.61, 64.29 (overlapping signals), 59.09, 59.05, 56.65, 56.49, 46.14 (overlapping signals), 37.00, 36.90, 35.34, 35.30, 30.83, 30.80, 14.26, 14.12. *Note. This was isolated as a 1.1:1 mixture of diastereoisomers; the carbon signals typically come in pairs. We were unable to definitively assign major/minor isomers.*

HR-MS (ESI-TOF)  $m/z$ :  $[\text{M}+\text{H}]^+$  calculated for  $\text{C}_{18}\text{H}_{29}\text{N}_2\text{O}_2^+$ , 305.2224; found mass, 305.2230.

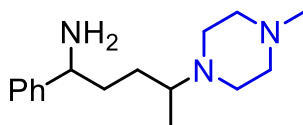

**22**

40% yield

1.2:1 dr

#### 4-(4-methylpiperazin-1-yl)-1-phenylpentan-1-amine (22)

The product was synthesized according to General Procedure C. This product (40%, 0.8 mmol) was isolated at 100 °C as a 1.2:1 mixture of diastereomers, with > 20:1 selectivity over the 1,3 and 1,5 diamine products.

$^1\text{H}$  NMR (500 MHz,  $\text{CDCl}_3$ ):  $\delta$  7.30 (m, 5H), 7.23 (m, 1H), 3.84 (m, 1H), 2.55-2.35 (m, 9zH), 2.25 (s, 3H), 1.71 (m, 2H), 1.62-1.52 (m, 1H, major (0.55H)), 1.45 – 1.36 (m, 1H, minor (0.45H)), 1.31 (ddt,  $J$  = 13.3, 8.9, 7.0 Hz, 1H, minor), 1.23 (s, 1H (NH)), 1.20-1.10 (m, 1H, major), 0.95-0.91 (m, 3H, apparent triplet, overlapping doublets for major and minor diastereoisomers).

$^{13}\text{C}$  NMR (126 MHz,  $\text{CDCl}_3$ ):  $\delta$  146.50, 146.36, 128.57 (overlapping major and minor), 127.08, 127.04, 126.44, 126.41, 58.99, 58.96, 56.65, 56.55, 55.53, 55.48, 47.97 (broad peak), 46.11, 46.10, 36.74, 36.70, 30.52, 30.48, 29.80, 14.30, 14.26. *Note. This was isolated as a 1.2:1 mixture of diastereoisomers; the carbon signals typically come in pairs. We were unable to definitively assign major/minor isomers.*

HR-MS (ESI-TOF)  $m/z$ :  $[\text{M}+\text{H}]^+$  calculated for  $\text{C}_{16}\text{H}_{28}\text{N}_3^+$ , 262.2278; found mass, 262.2287.

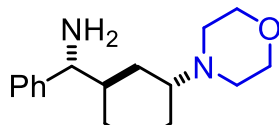

**23**

29% yield

>20:1 dr

**(3-morpholinocyclohexyl)(phenyl)methanamine (23)**

This product (29%, 0.058 mmol) was isolated as a mixture of diastereomers with predominantly the shown diastereomer (>20:1 selectivity), with > 20:1 selectivity over the 1,3 and 1,5 diamine products.

$^1\text{H}$  NMR (500 MHz,  $\text{CDCl}_3$ ):  $\delta$  7.42 – 7.26 (m, 4H), 7.23 (t,  $J$  = 6.9 Hz, 1H), 3.74 – 3.67 (m, 4H), 2.43 (m, 4H), 2.34 (m, 1H), 2.05 – 1.89 (m, 2H), 1.77 – 1.65 (m, 1H), 1.64 – 1.49 (m, 4H), 1.44 (ddt,  $J$  = 13.2, 6.6, 3.1 Hz, 2H), 1.38 (dtd,  $J$  = 12.0, 6.7, 6.2, 3.3 Hz, 2H), 1.08 – 0.96 (m, 1H).

$^{13}\text{C}$  NMR (126 MHz,  $\text{CDCl}_3$ ):  $\delta$  145.98, 128.59, 127.21, 127.18, 67.71, 60.03, 59.20, 50.69, 39.75, 30.97, 29.83, 28.65, 20.78.

HR-MS (ESI-TOF)  $m/z$ :  $[\text{M}+\text{H}]^+$  calculated for  $\text{C}_{17}\text{H}_{27}\text{N}_2\text{O}^+$ , 275.2118; found mass = 275.2117

## E. Control Experiments

### a. Reactivity Comparison of *cis* and *trans* olefin isomers

#### Hydroamination Experiment with (*E*)-**1a**

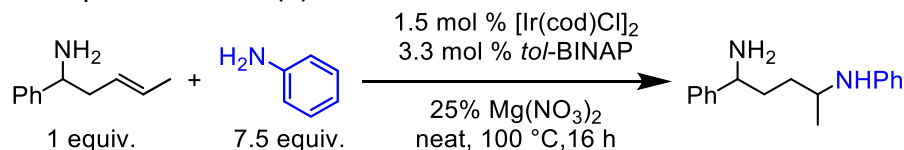

**Figure S1.** GC spectrum of starting material of (*E*)-**1a** with *E*:*Z* ratio of 6.9:1

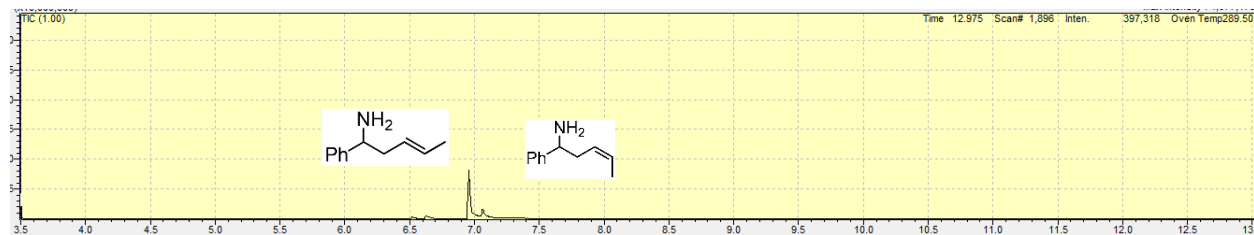

**Figure S2.** GC spectrum of the reaction mixture after 16 h with remaining (*E*)-**1a** with *E*:*Z* ratio of 3.3:1

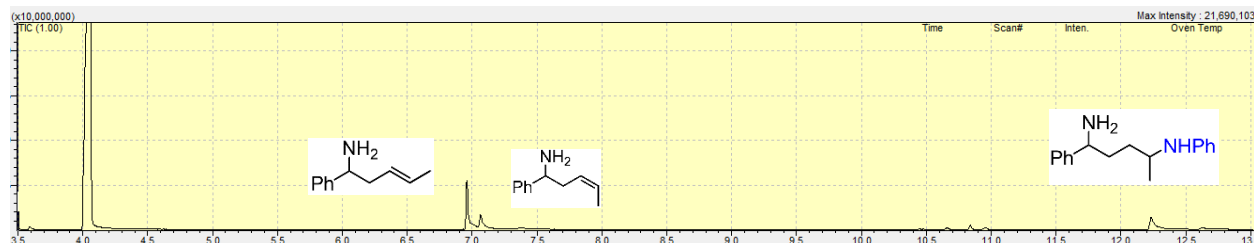

When (*E*)-**1a** is used in the reaction, rather than (*Z*)-**1a**, we see a significant reduction in yield, 35% and 80% yield, respectively. Further, the *E*:*Z* ratio of **1a** erodes over the course of the reaction, as the initial ratio was 6.9:1 and the final ratio, after 16 hours, is 3.3:1. This suggests that the alkene is isomerizing under our reaction conditions. The d.r. for the reactions with the *cis* and *trans* alkenes are identical, as depicted by the <sup>1</sup>H NMR signal corresponding to the CH<sub>3</sub> shown (top spectra, in green, is the *cis* alkene; bottom spectra is the *trans*).

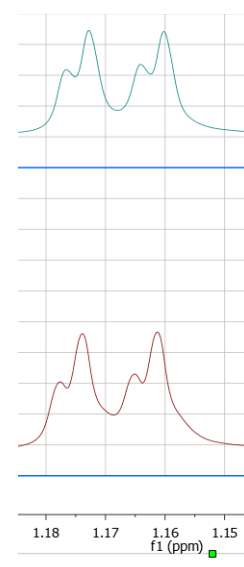

b. Hydroamination Control Experiments with Cyclohexene

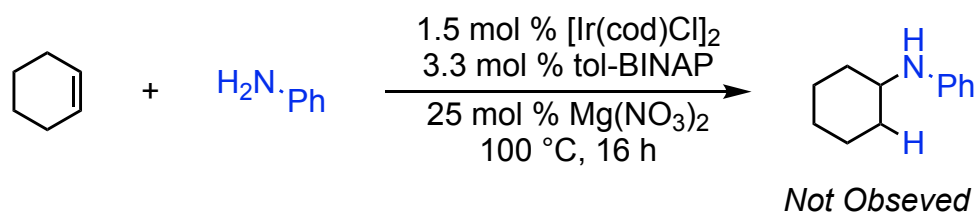

Figure S3. GC trace of hydroamination with cyclohexene and aniline.

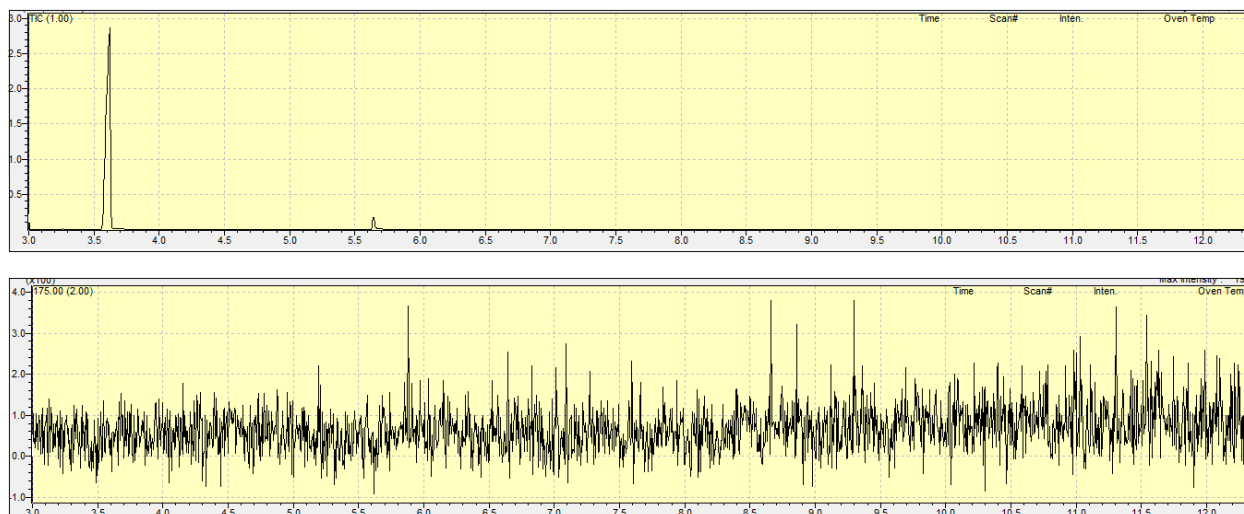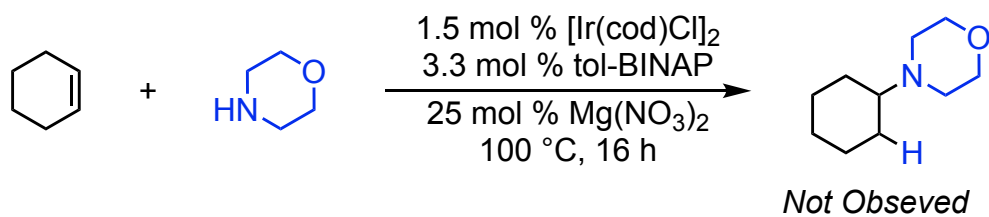

Figure S4. . GC trace of hydroamination with cyclohexene and morpholine.

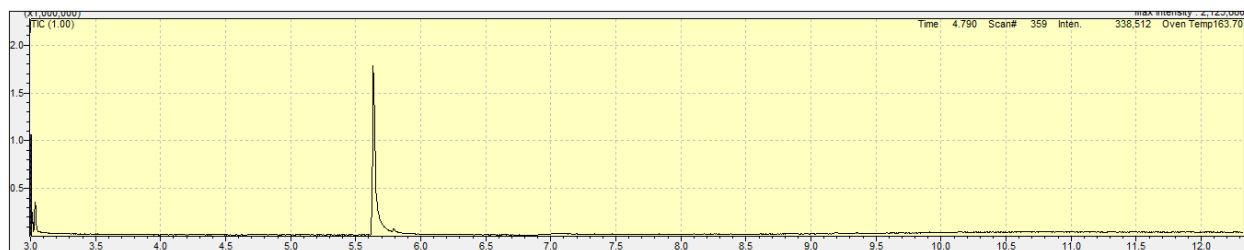

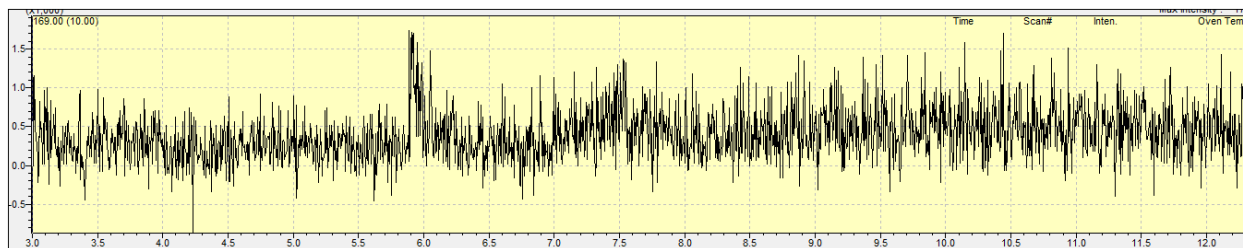

No hydroamination products are observed in the absence of the amine-directing group, suggesting that it is necessary for reactivity.

#### F. Mechanistic Investigations

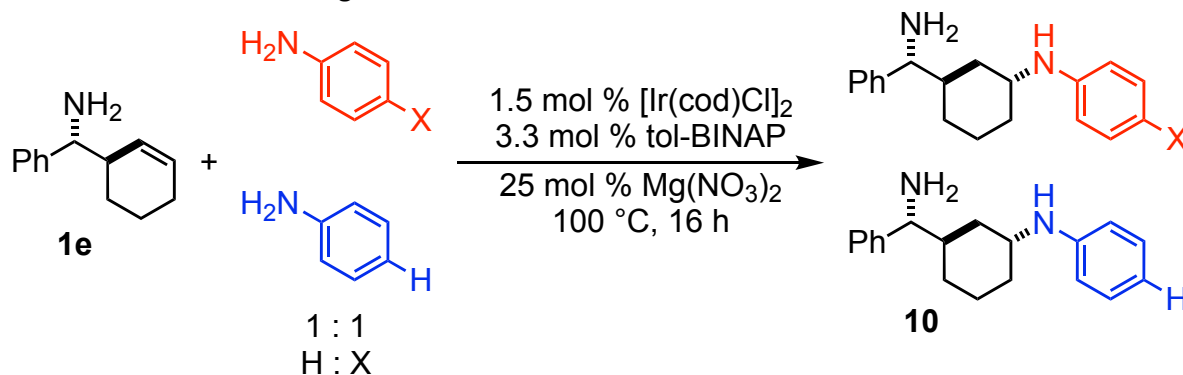

##### a. Competition Hammett plot with cyclic internal alkene **1e**

To a 4 mL vial equipped with stir bar was added  $[\text{Ir}(\text{cod})\text{Cl}]_2$  (2.01 mg, 1.5 mol %), *tol*-BINAP (4.48 mg, 3.3 mol %),  $\text{Mg}(\text{NO}_3)_2$  (7.4 mg, 0.05 mmol, .25 equiv), **1e** (0.2 mmol, 1 equiv). A mixture of aniline (1.5 mmol, 7.5 equiv) and substituted aniline (1.5 mmol, 7.5 equiv.) was made and heated at 30 °C until the solid was fully dissolved; the aniline mixture was added to the 4 mL vial, sealed with Teflon cap, removed from the nitrogen-filled glove box, and heated to 100 °C for 2 h while stirring. The resulting slurry was then cooled to room temperature, the 4 mL vial was uncapped, 1-methylnaphthalene (5  $\mu\text{L}$ , 35.2  $\mu\text{mol}$ ) was added as an internal standard, and *ca* 1 mL each of half-saturated  $\text{K}_2\text{CO}_3$  (aq) and  $\text{CH}_2\text{Cl}_2$  was added to the slurry. The 4 mL vial was capped, the biphasic mixture shaken several times. The crude organic layer was analyzed by GC and calibrated *in situ* yields of **X** vs. **H** were determined by comparison to an internal standard.



**Table S4.** Initial rate constants for the hydroamination of **1e**

| Aniline                                                                                   | Products ratio (X/H) | Log <sub>10</sub> ([X]/[H]) |
|-------------------------------------------------------------------------------------------|----------------------|-----------------------------|
| 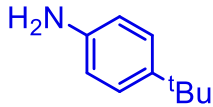<br>26   | 1.465                | 0.630                       |
| <br>27   | 1.384                | 0.618                       |
| <br>28   | 0.509                | -0.085                      |
| <br>29  | 0.681                | -0.303                      |
| <br>30 | 0.170                | -0.375                      |

**<sup>1</sup>H NMR and HRMS Data for 25-29:**

**26.** <sup>1</sup>H NMR (400 MHz, CDCl<sub>3</sub>) δ 7.22 – 7.13 (m, 7H), 6.61 (d, *J* = 8.2 Hz, 2H), 3.69 (m, 1H), 3.63 (d, *J* = 9.1 Hz, 1H), 2.25 – 2.20 (m, 2H), 2.10-2.00 (m, 1H), 1.83 – 1.67 (m, 2H), 1.52 – 1.33 (m, 4H), 1.27 (s, 9H), 0.97 – 0.77 (m, 1H), 0.77-0.64 (m, 1H).

HR-MS (ESI-TOF) *m/z*: [M+Na]<sup>+</sup> calculated for C<sub>23</sub>H<sub>32</sub>N<sub>2</sub>Na<sup>+</sup>, 359.2458; found mass, 359.2461

**27.** <sup>1</sup>H NMR (400 MHz, CDCl<sub>3</sub>) δ 7.39 – 7.22 (m, 5H), 6.95 (d, *J* = 8.2 Hz, 2H), 6.55 (d, *J* = 8.4 Hz, 2H), 3.76 – 3.69 (m, 1H), 3.65 (d, *J* = 8.5 Hz, 1H), 2.21 (s, 3H), 2.19 – 1.98 (m, 2H), 1.84 – 1.71 (m, 1H), 1.50 – 1.35 (m, 3H), 1.34 – 1.20 (m, 2H), 0.92 – 0.78 (m, 1H).

HR-MS (ESI-TOF) *m/z*: [M+Na]<sup>+</sup> calculated for C<sub>20</sub>H<sub>26</sub>N<sub>2</sub>Na<sup>+</sup>, 317.1988; found mass, 317.1984

**28.** <sup>1</sup>H NMR (500 MHz, CDCl<sub>3</sub>) δ 7.38 – 7.29 (m, 2H), 7.29 – 7.16 (m, 3H), 7.06 (t, *J* = 8.1 Hz, 1H), 6.24 (d, *J* = 8.1 Hz, 1H), 6.23 (d, *J* = 8.1 Hz, 1H), 6.18 (d, *J* = 2.2 Hz, 1H), 3.77 (s, 3H), 3.76 – 3.71 (m, 1H), 3.66 (d, *J* = 8.1 Hz, 1H), 2.07 (d, *J* = 13.4 Hz, 1H), 1.88 – 1.80 (m, 1H), 1.80 – 1.70 (m, 1H), 1.58 – 1.45 (m, 3H), 1.44 –

1.34 (m, 2H), 0.95 – 0.84 (m, 1H).

HR-MS (ESI-TOF)  $m/z$ :  $[M+Na]^+$  calculated for  $C_{20}H_{26}N_2ONa^+$ , 333.1937; found mass, 333.1941

**29.**  $^1H$  NMR (400 MHz,  $CDCl_3$ )  $\delta$  7.37 – 7.28 (m, 2H), 7.26 – 7.17 (m, 3H), 7.09 (d,  $J = 8.8$  Hz, 2H), 6.54 (d,  $J = 8.9$  Hz, 2H), 3.74 – 3.66 (m, 1H), 3.64 (d,  $J = 8.3$  Hz, 1H), 2.67 – 2.17 (bs, 3H), 2.09 (d,  $J = 13.5$  Hz, 1H), 2.00 – 1.88 (m, 1H), 1.78 – 1.68 (m, 1H), 1.55 – 1.21 (m, 5H), 0.86 (q,  $J = 10.9$  Hz, 1H).

HR-MS (ESI-TOF)  $m/z$ :  $[M+H]^+$  calculated for  $C_{19}H_{24}ClN_2^+$ , 315.1623; found mass, 315.1617

**30.**  $^1H$  NMR (500 MHz,  $CDCl_3$ )  $\delta$  7.87 (d,  $J = 8.8$  Hz, 2H), 7.39 – 7.22 (m, 5H), 6.57 (d,  $J = 8.7$  Hz, 2H), 4.32 (q,  $J = 7.1$  Hz, 2H), 3.84 (s, 1H), 3.67 (d,  $J = 8.2$  Hz, 1H), 2.10 (d,  $J = 12.8$  Hz, 1H), 1.90 – 1.68 (m, 6H), 1.62 – 1.48 (m, 3H), 1.47 – 1.39 (m, 1H), 1.37 (t,  $J = 7.1$  Hz, 3H), 0.92 (q,  $J = 12.1$  Hz, 1H).

HR-MS (ESI-TOF)  $m/z$ :  $[M+H]^+$  calculated for  $C_{22}H_{28}N_2O_2^+$ , 353.2224; found mass, 353.2230

**Figure S5.** Hammett plot for the hydroamination of **1e** with sigma value.

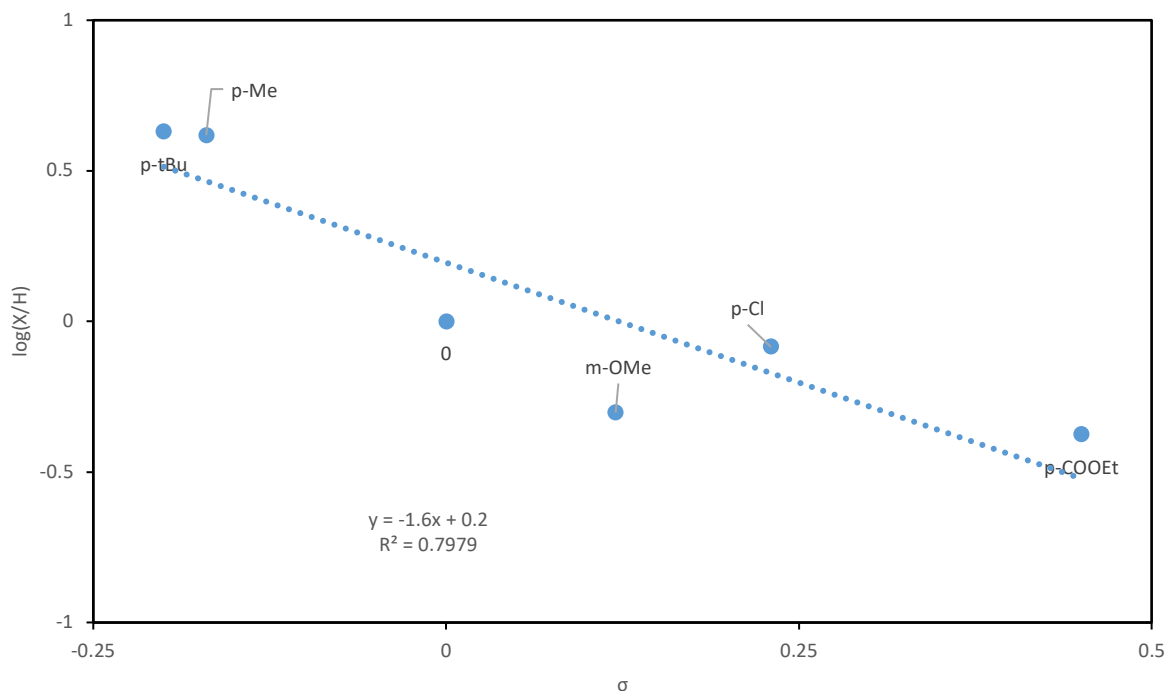

**Figure S6.** Hammett plot for the hydroamination of **1e** with sigma plus value

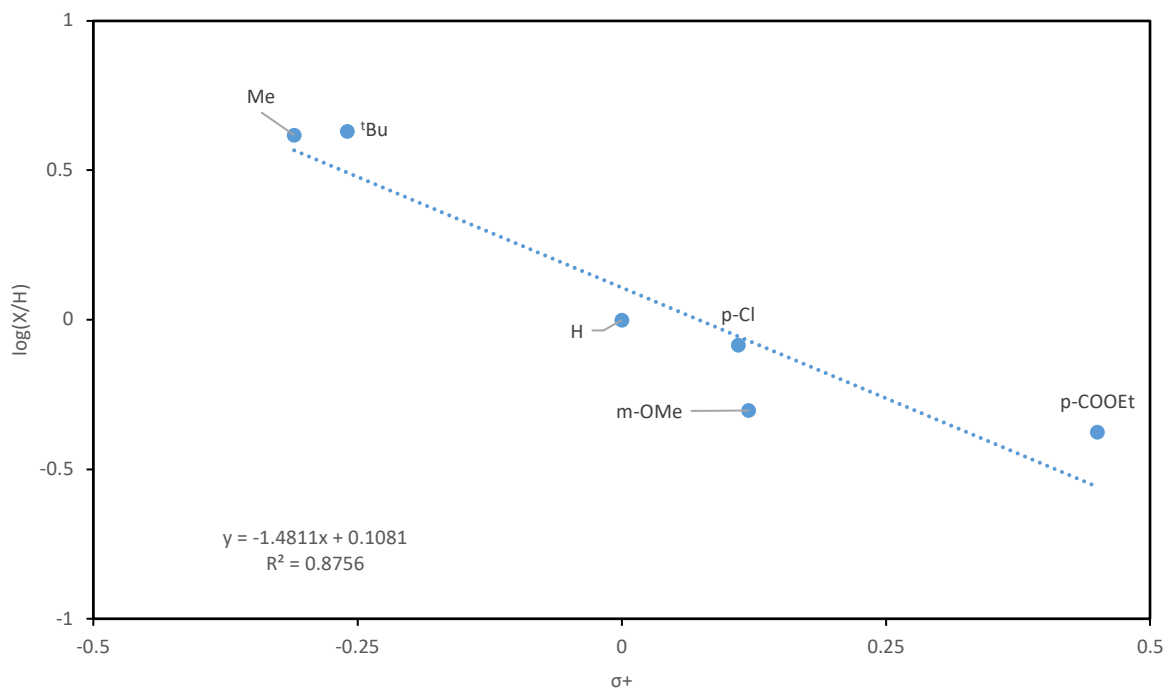

**b. Competition Hammett Study with acyclic *cis*-alkene **1a****

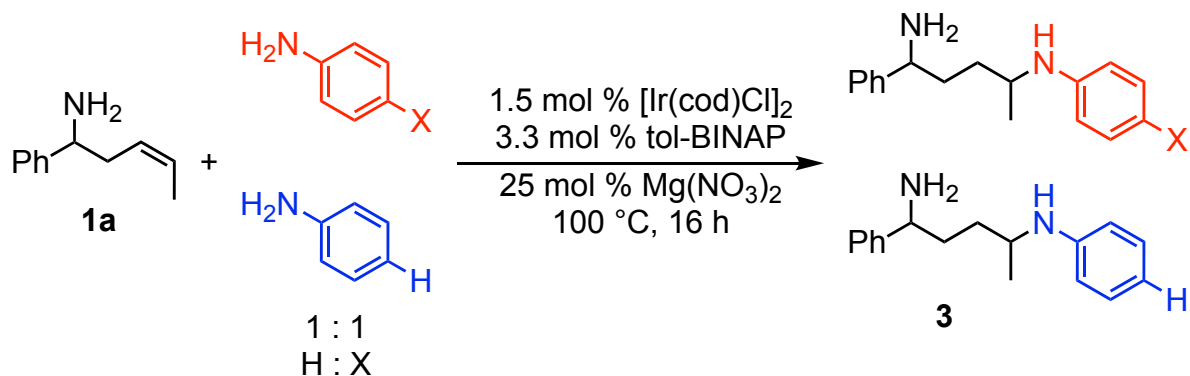

To a 4 mL vial equipped with stir bar was added [Ir(cod)Cl]<sub>2</sub> (2.01 mg, 1.5 mol %), *tol*-BINAP (4.48 mg, 3.3 mol %), MgNO<sub>3</sub> (7.4 mg, 0.05 mmol, .25 equiv), **1a** (0.2 mmol, 1 equiv). A mixture of aniline (1.5 mmol, 7.5 equiv) and substituted aniline (1.5 mmol, 7.5 equiv.) was made and heated at 30 °C until solid was dissolved and the mixture was homogenous. The anilines mixture was added to the 4 mL vial, the vial was sealed with Teflon cap, removed from nitrogen filled glove box, and heated to 100 °C for 2 h while stirring. The resulting slurry was then cooled to room temperature, the 4 mL vial was uncapped, 1-methylnaphthalene (5  $\mu$ L, 35.2  $\mu$ mol) was added as an internal standard, and *ca* 1 mL each of half-saturated K<sub>2</sub>CO<sub>3</sub> (aq) and CH<sub>2</sub>Cl<sub>2</sub> was added to the slurry. The 4 mL vial was capped, the biphasic mixture shaken several times. The crude organic layer was analyzed by GC and calibrated *in situ* yields of **X** vs. **H** were determined by comparison to an internal standard.

**Figure S7.** Hammett plot for the hydroamination of **1a** with sigma value.

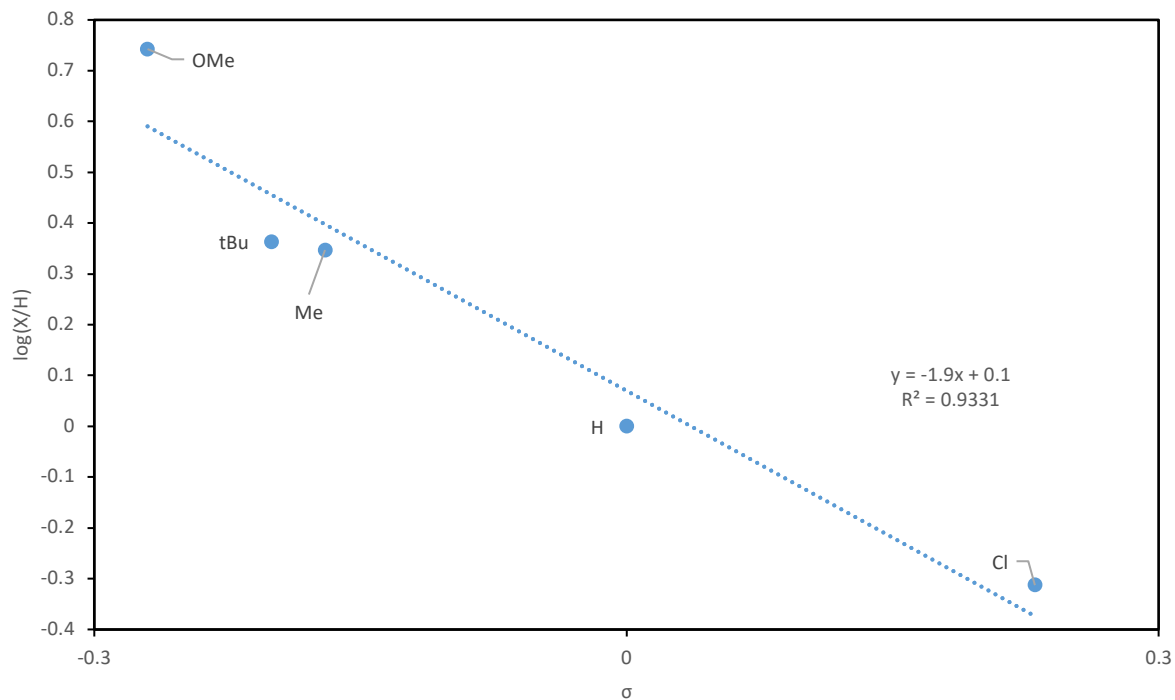

**Figure S8.** Hammett plot for the hydroamination of **1a** with sigma plus value

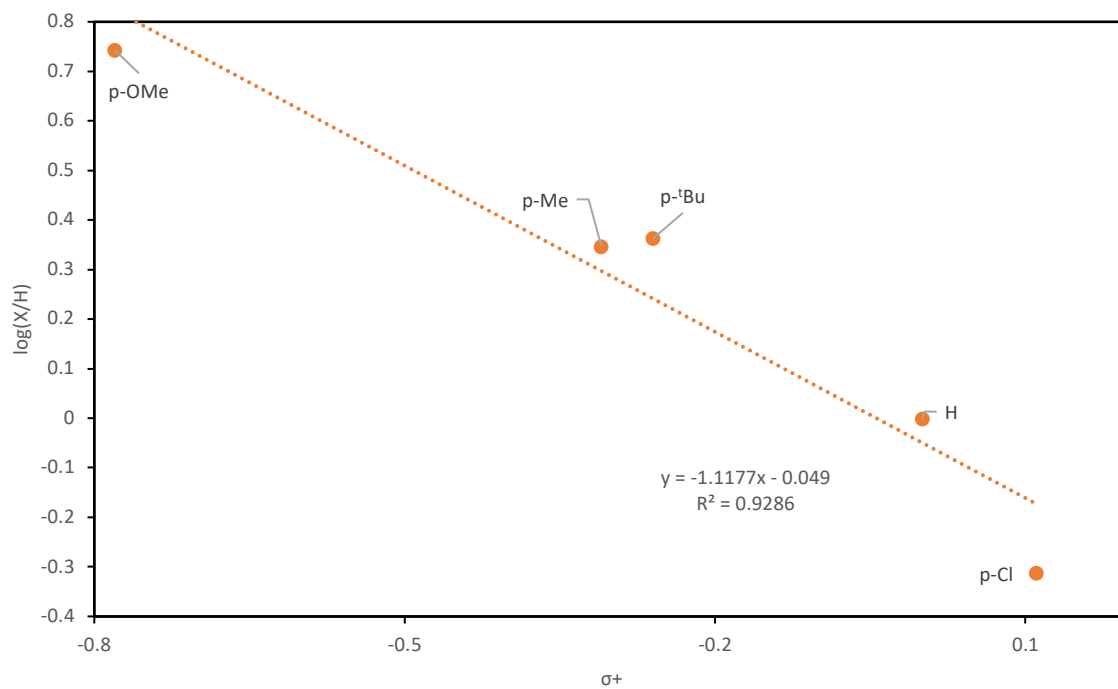

**Table S5.** Initial rate constants for the hydroamination of **1a**

| Aniline                                                                                         | Products ratio (X/H) |       |       |             | Log <sub>10</sub> ([X]/[H]) |
|-------------------------------------------------------------------------------------------------|----------------------|-------|-------|-------------|-----------------------------|
|                                                                                                 | Run 1                | Run 2 | Run 3 | Average     |                             |
| 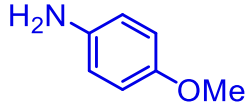<br><b>6</b>   | 7.278                | 4.658 | 4.651 | 6±1         | 0.7426                      |
| <br><b>31</b>  | 2.663                | 1.976 | 2.284 | 2.3±0.3     | 0.3632                      |
| <br><b>32</b>  | 2.575                | 2.291 | 1.807 | 2.2±0.4     | 0.3472                      |
| <br><b>33</b> | 0.484                | 0.490 | 0.488 | 0.487±0.002 | -0.3123                     |

**<sup>1</sup>H NMR Data for 30-32:**

**31.** <sup>1</sup>H NMR (500 MHz, CDCl<sub>3</sub>) δ 7.36 – 7.21 (m, 7H), 7.16 (d, *J* = 8.6 Hz, 2H), 6.48 (d, *J* = 8.4 Hz, 2H), 3.88 (t, *J* = 6.9 Hz, 1H), 3.47 – 3.37 (m, 1H), 2.13 (s, 3H), 1.90 – 1.71 (m, 2H), 1.60 (dddd, *J* = 13.0, 11.1, 6.3, 4.9 Hz, 1H (0.65H, major)), 1.51 (ddt, *J* = 13.1, 8.9, 6.4 Hz, 1H (0.35H, minor)), 1.47 – 1.38 (m, 1H (0.35H, minor)), 1.38 – 1.29 (m, 1H (0.65H, major)), 1.27 (s, 9H), 1.13 (d, *J* = 6.3 Hz, 3H (minor)), 1.13 (d, *J* = 6.3 Hz, 3H (major)).

HR-MS (ESI-TOF) *m/z*: [M+H]<sup>+</sup> calculated for C<sub>21</sub>H<sub>30</sub>N<sub>2</sub><sup>+</sup>, 311.2475; found mass, 311.2482

**32.** <sup>1</sup>H NMR (500 MHz, CDCl<sub>3</sub>) δ 7.38 – 7.21 (m, 5H), 6.95 (d, *J* = 7.9 Hz, 2H), 6.46 (d, *J* = 7.9 Hz, 2H), 3.88 (t, *J* = 6.9 Hz, 1H), 3.40 (d, *J* = 6.3 Hz, 1H), 2.22 (s, 3H), 2.09 (s, 3H), 1.89 – 1.70 (m, 2H), 1.60 (tt, *J* = 11.3, 5.5 Hz, 1H (0.7H, major)), 1.51 (dq, *J* = 14.9, 7.0 Hz, 1H (0.3H minor)), 1.47 – 1.37 (m, 1H (0.3H, minor)), 1.32 (tt, *J* = 12.0, 5.8 Hz, 1H (0.7H, major)), 1.12 (d, *J* = 6.4 Hz, 3H).

HR-MS (ESI-TOF) *m/z*: [M+H]<sup>+</sup> calculated for C<sub>21</sub>H<sub>31</sub>N<sub>2</sub><sup>+</sup>, 311.2482; found mass, 311.2475

**33.** <sup>1</sup>H NMR (500 MHz, CDCl<sub>3</sub>) δ 7.32 – 7.23 (m, 5H), 7.05 (d, *J* = 8.8 Hz, 2H), 6.40 (d, *J* = 8.8 Hz, 2H), 3.90 (t, *J* = 7.0 Hz, 1H), 3.35 (q, *J* = 6.4 Hz, 1H), 2.43 (s, 3H), 1.94 – 1.72 (m, 2H), 1.57 (tt, *J* = 11.5, 5.8 Hz, 1H (0.7H major)), 1.52 – 1.37 (m, 2H (0.6H, minor)), 1.32 (td, *J* = 12.1, 5.7 Hz, 1H (0.7H, major)), 1.10 (d, *J* = 6.3 Hz, 3H (minor)), 1.09 (d, *J* = 6.3 Hz, 3H (major)).

HR-MS (ESI-TOF) *m/z*: [M+H]<sup>+</sup> calculated for C<sub>17</sub>H<sub>22</sub>ClN<sub>2</sub><sup>+</sup>, 289.1466; found mass, 289.1462

**Table S6.** Chloride Loading Screen

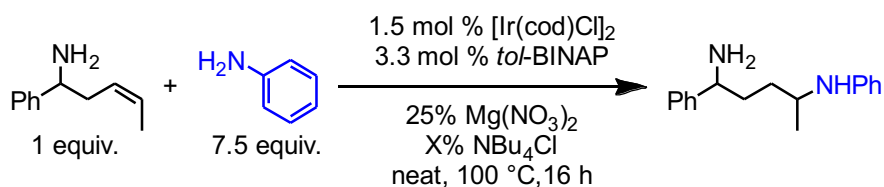

| NBu <sub>4</sub> Cl loading | GC yield (%) |
|-----------------------------|--------------|
| none                        | 80           |
| 10 mol%                     | 10           |

## G. X-Ray Crystal Structure Data for 10 and 22

### Preparation of 10•naphthalene-1,5-disulfonic acid

X-ray quality crystals were obtained for 10•naphthalene-1,5-disulfonic acid by mixing 0.1 mmol **10** and 0.1 mmol Armstrong's Acid (naphthalene-1,5-disulfonic acid) in 1 mL ethanol for 30 minutes at room temperature, then taking a small portion of this and layering it with fresh ethanol and EtOAc as an antisolvent, and waiting for 2 weeks for suitable crystals to form.

### X-ray crystallography parameters and select bond lengths and angles for 10•Armstrong's Acid:

**X-Ray Diffraction Techniques:** The structure was collected on a Bruker three-circle platform goniometer equipped with an Apex II CCD and an Oxford cryostream cooling device. Radiation was from a graphite fine focus sealed tube Mo K $\alpha$  (0.71073 Å) source. A suitable crystal was mounted on a cryoloop using paratone N oil. The structure was collected at 100 K. Data was collected as a series of  $\phi$  and/ or  $\omega$  scans. Data was integrated using SAINT<sup>1</sup> and scaled with either numerical or multi-scan absorption correcting using SADABS.<sup>1</sup> Using Olex2,<sup>2</sup> the structure was solved with the XS<sup>3</sup> structure solution program using the Patterson method and refined with the XL<sup>4</sup> refinement package using Least Squares minimization.

**Table S7.** X-ray diffraction experimental details for **10•** naphthalene-1,5-disulfonic acid

|                                   |                                                                                 |
|-----------------------------------|---------------------------------------------------------------------------------|
| Formula                           | C <sub>160</sub> H <sub>128</sub> N <sub>8</sub> O <sub>32</sub> S <sub>8</sub> |
| W                                 | 2931.26                                                                         |
| Crystal system                    | Monoclinic                                                                      |
| Space group (Z)                   | P2 <sub>1</sub> /C                                                              |
| a (Å)                             | 15.6273(6)                                                                      |
| b (Å)                             | 11.1454(4)                                                                      |
| c (Å)                             | 21.3411(8)                                                                      |
| α (°)                             | 90°                                                                             |
| β (°)                             | 104.896(2)°                                                                     |
| γ (°)                             | 90°                                                                             |
| Volume (Å <sup>3</sup> )          | 3592.1(2)                                                                       |
| Calc. ρ (g/cm <sup>3</sup> )      | 1.355                                                                           |
| μ (mm <sup>-1</sup> )             | 0.21                                                                            |
| Crystal Size (mm)                 | 0.104x0.119x0.322                                                               |
| Reflections                       | 74455                                                                           |
| Completeness<br>(to 2θ)           | 1.0<br>(50.79)                                                                  |
| GOF on F <sup>2</sup>             | 1.122                                                                           |
| R1, wR2 <sup>c</sup><br>[I>2σ(I)] | 0.0529, 0.1797                                                                  |

<sup>a</sup> λ = 0.71073 Å; <sup>b</sup> T=100 K; <sup>c</sup> R1 =  $\Sigma ||F_o| - |F_c|| / \Sigma |F_o|$ , wR2 =  $\{\Sigma [w(F_o^2 - F_c^2)^2] / \Sigma [w(F_o^2)^2]\}^{1/2}$

**Figure S9.** Crystal structure of **10**•naphthalene-1,5-disulfonic acid with select atoms labeled. Hydrogen atoms have been omitted, one thing to note is that both amines are protonated. Thermal ellipsoids are drawn at 50% probability.

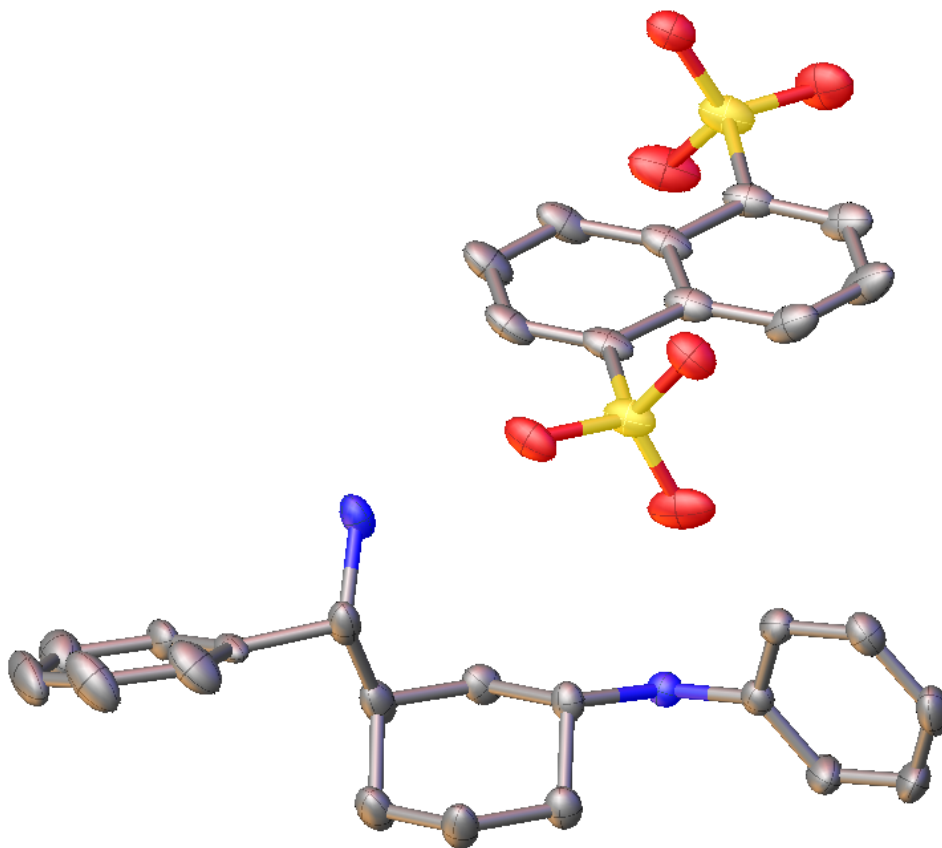



X-ray quality crystals were obtained for **22•2TsOH** through mixing 0.2 mmol **22** and 0.42 mmol *p*-toluene sulfonic acid monohydrate (TsOH•H<sub>2</sub>O) in 1 mL ethanol for 30 minutes at room temperature, then taking a small portion of this and layering it with fresh ethanol and diethyl ether as an antisolvent, and waiting for 2 weeks for suitable crystals to form.

**X-ray crystallography parameters and select bond lengths and angles for 22•2TsOH:**

**X-Ray Diffraction Techniques:** The structure was collected on a Bruker three-circle platform goniometer equipped with an Apex II CCD and an Oxford cyrostream cooling device. Radiation was from a graphite fine focus sealed tube Mo K $\alpha$  (0.71073 Å) source. A suitable crystal was mounted on a cryoloop using paratone N oil. The structure was collected at 100 K. Data was collected as a series of  $\phi$  and/ or  $\omega$  scans. Data was integrated using SAINT and scaled with either numerical or multi-scan absorption correcting using SADABS. Using Olex2, the structure was solved with the XS structure solution program using the Patterson method and refined with the XL refinement package using Least Squares minimization.

**Table S8.** X-ray diffraction experimental details for **22•2TsOH**

|                                            |                                                                              |
|--------------------------------------------|------------------------------------------------------------------------------|
| Formula                                    | C <sub>31</sub> H <sub>42</sub> N <sub>2</sub> O <sub>7</sub> S <sub>2</sub> |
| W                                          | 2475.13                                                                      |
| Crystal system                             | Cubic                                                                        |
| Space group (Z)                            | P2 <sub>1</sub> 2 <sub>1</sub> 2 <sub>1</sub>                                |
| a (Å)                                      | 11.1123(4)                                                                   |
| b (Å)                                      | 11.2096(4)                                                                   |
| c (Å)                                      | 24.9678(9)                                                                   |
| $\alpha$ (°)                               | 90°                                                                          |
| $\beta$ (°)                                | 90°                                                                          |
| $\gamma$ (°)                               | 90°                                                                          |
| Volume (Å <sup>3</sup> )                   | 3110.1(0)                                                                    |
| Calc. $\rho$ (g/cm <sup>3</sup> )          | 1.322                                                                        |
| $\mu$ (mm <sup>-1</sup> )                  | 0.22                                                                         |
| Crystal Size (mm)                          | 0.15x0.475x0.529                                                             |
| Reflections                                | 77911                                                                        |
| Completeness<br>(to 2 $\theta$ )           | 1.0<br>(56.61)                                                               |
| GOF on F <sup>2</sup>                      | 1.035                                                                        |
| R1, wR2 <sup>c</sup><br>[I>2 $\sigma$ (I)] | 0.0275, 0.0737                                                               |

$$^a \lambda = 0.71073 \text{ \AA}; ^b T=100 \text{ K}; ^c R1 = \sum ||F_o| - |F_c|| / \sum |F_o|, wR2 = \{\sum [w(F_o^2 - F_c^2)^2] / \sum [w(F_o^2)^2]\}^{1/2}$$

**Figure S10.** Crystal structure of **22**•2TsOH with select atoms labeled. Hydrogen atoms have been omitted, one thing to note is that both amines are protonated. Thermal ellipsoids are drawn at 50% probability.

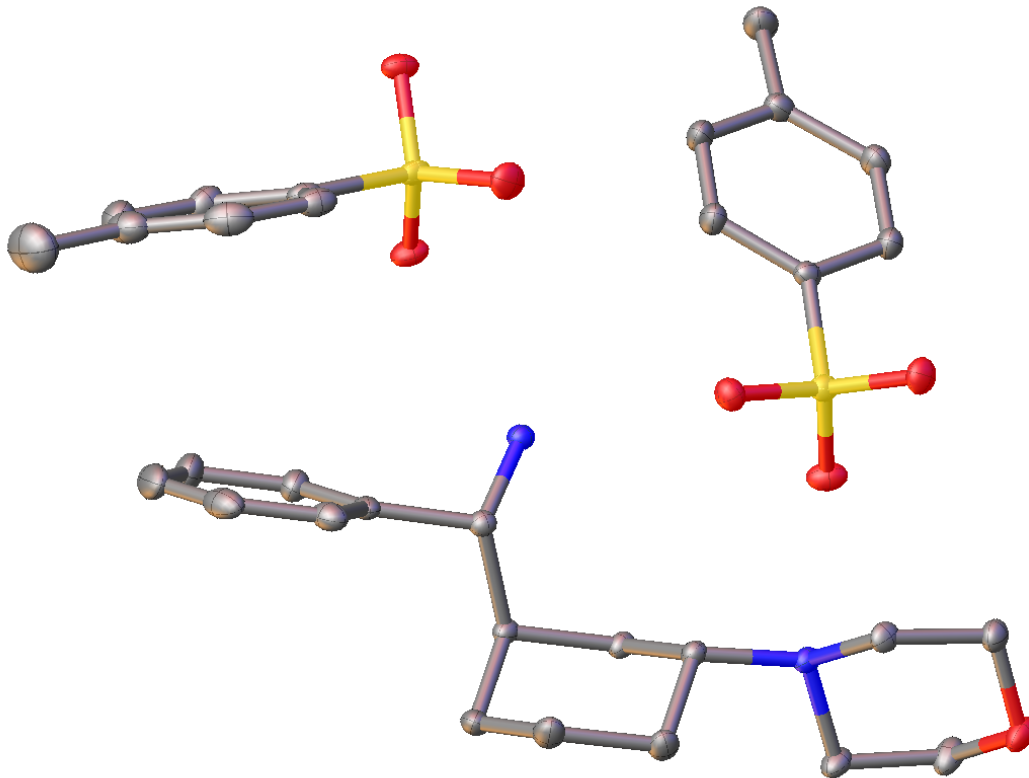

## H. References

- (1) Bruker AXS. **2009**, Apex II. Bruker AXS, Madison, Wisconsin.
- (2) O. V. Dolomanov, L. J. Bourhis, R. J. Gildea, J. A. K. Howard, H. Puschmann, *Journal of Applied Crystallography* 2009, **42**, 339-341.
- (3) L. J. Bourhis, O. V. Dolomanov, R. J. Gildea, J. A. K. Howard, H. Puschmann, *Acta Crystallographica Section A Foundations and Advances* 2015, **71**, 59-75.
- (4) G. M. Sheldrick, *Acta Crystallographica Section A Foundations of Crystallography* 2008, **64**, 112-122.

## I. HRMS Spectra

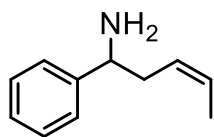

**1a**

HR-MS (ESI-TOF)  $m/z$ :  $[M+H]^+$  calculated for  $C_{11}H_{16}N^+$ , 162.1283; found, 162.1285.

Simulated

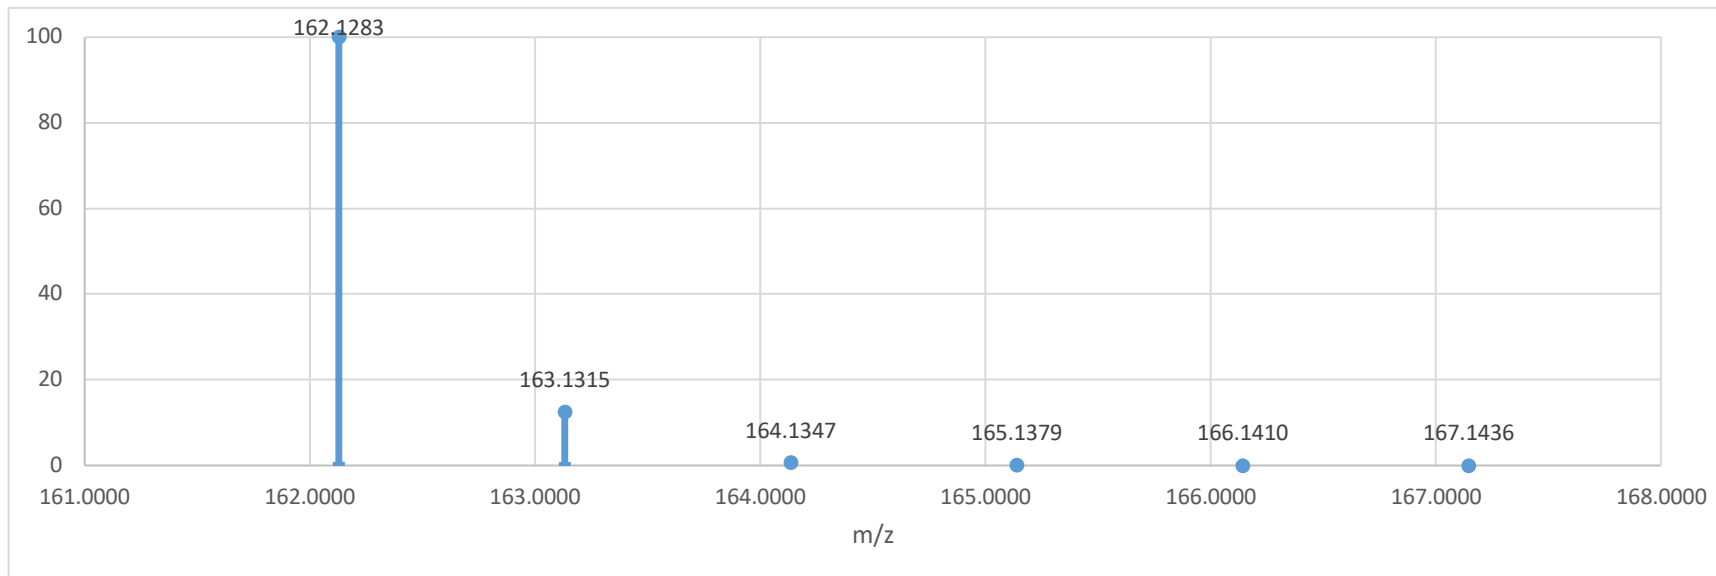

## Measured

Monoisotopic Mass, Even Electron Ions

51 formula(e) evaluated with 1 results within limits (up to 50 closest results for each mass)

Elements Used:

C: 0-200 H: 0-200 N: 0-6 Na: 0-1 Br: 0-1

ev-e-z-me

Qtof\_69271 57 (2.183) AM (Cen,5, 80.00, Ar,14000.0,558.36,0.70,LS 5); Sm (SG, 2x5.00); Cm (57:61)

1: TOF MS ES+  
1.57e+003

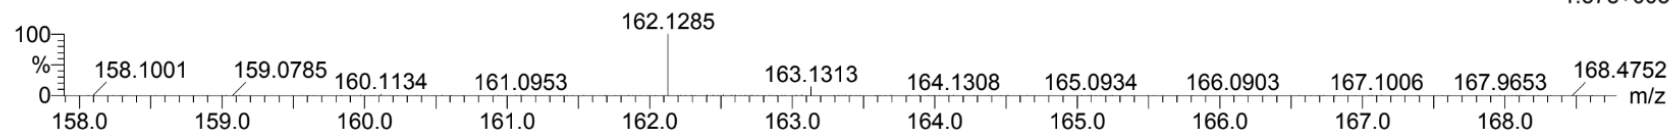

Minimum: -1.5  
Maximum: 5.0 5.0 100.0

| Mass     | Calc. Mass | mDa | PPM | DBE | i-FIT | Formula   |
|----------|------------|-----|-----|-----|-------|-----------|
| 162.1285 | 162.1283   | 0.2 | 1.2 | 4.5 | 0.9   | C11 H16 N |

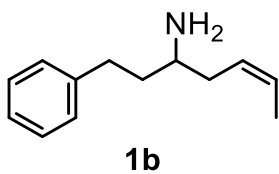

HR-MS (ESI-TOF)  $m/z$ :  $[M+H]^+$  jcalculated for  $C_{13}H_{20}N^+$ , 190.1596; found, 190.1597.

Simulated

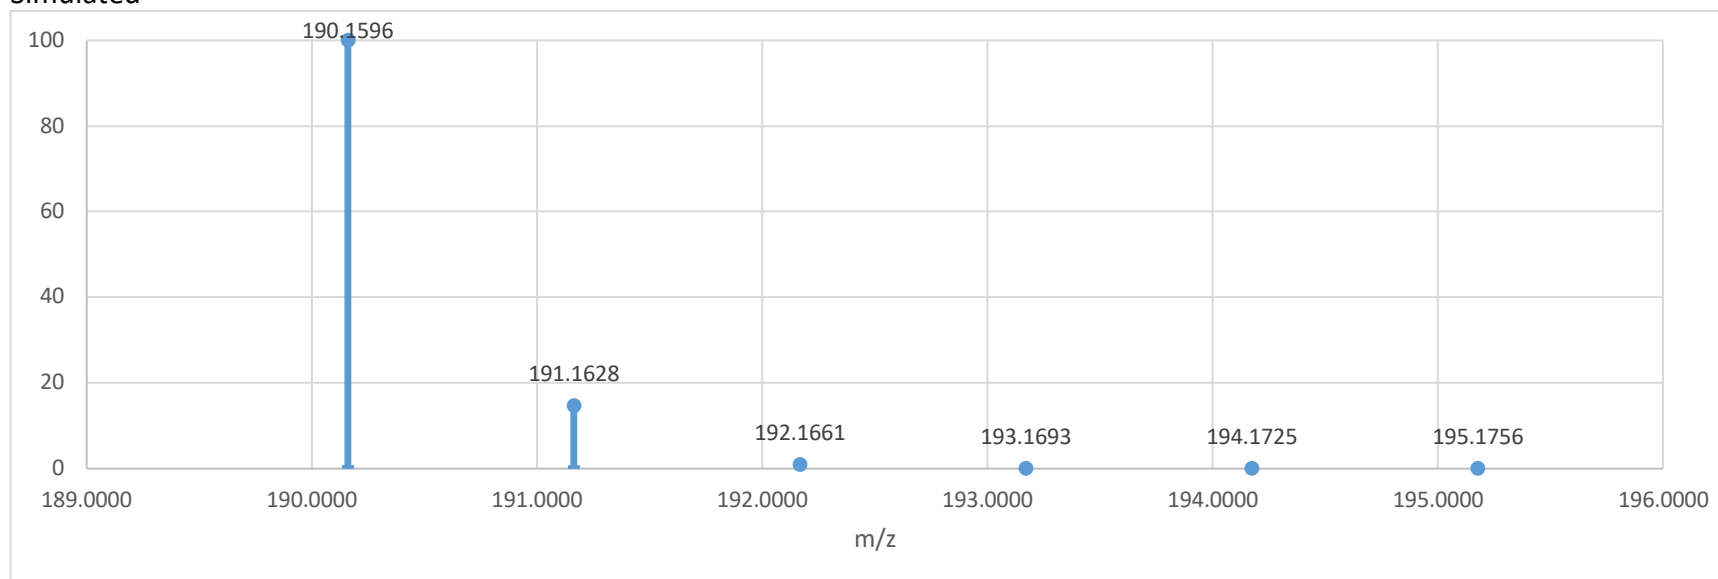

### Measured

Monoisotopic Mass, Even Electron Ions

40 formula(e) evaluated with 1 results within limits (up to 50 closest results for each mass)

Elements Used:

C: 0-200 H: 0-200 N: 0-6 Na: 0-1

ev-e-hcinn

Qtof\_69269 68 (2.591) AM (Cen,5, 80.00, Ar,14000.0,558.36,0.70,LS 5); Sm (SG, 2x5.00); Cm (68:72)

1: TOF MS ES+  
3.76e+003

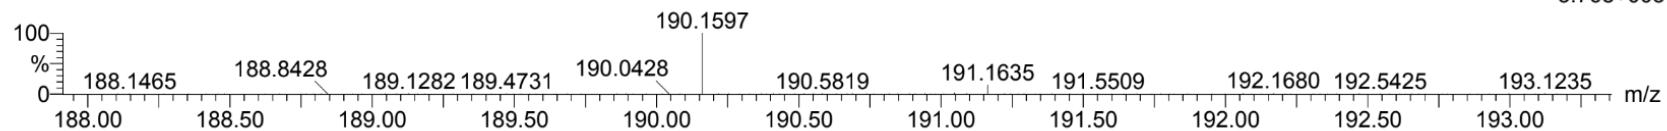

Minimum:

-1.5

Maximum:

5.0

5.0

100.0

| Mass     | Calc. Mass | mDa | PPM | DBE | i-FIT | Formula   |
|----------|------------|-----|-----|-----|-------|-----------|
| 190.1597 | 190.1596   | 0.1 | 0.5 | 4.5 | 0.4   | C13 H20 N |

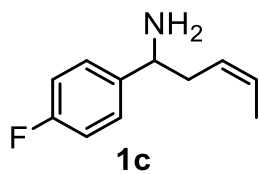

HR-MS (ESI-TOF)  $m/z$ :  $[M+H]^+$  calculated for  $C_{11}H_{15}FN^+$ , 180.1189; found, 180.1190.

Simulated

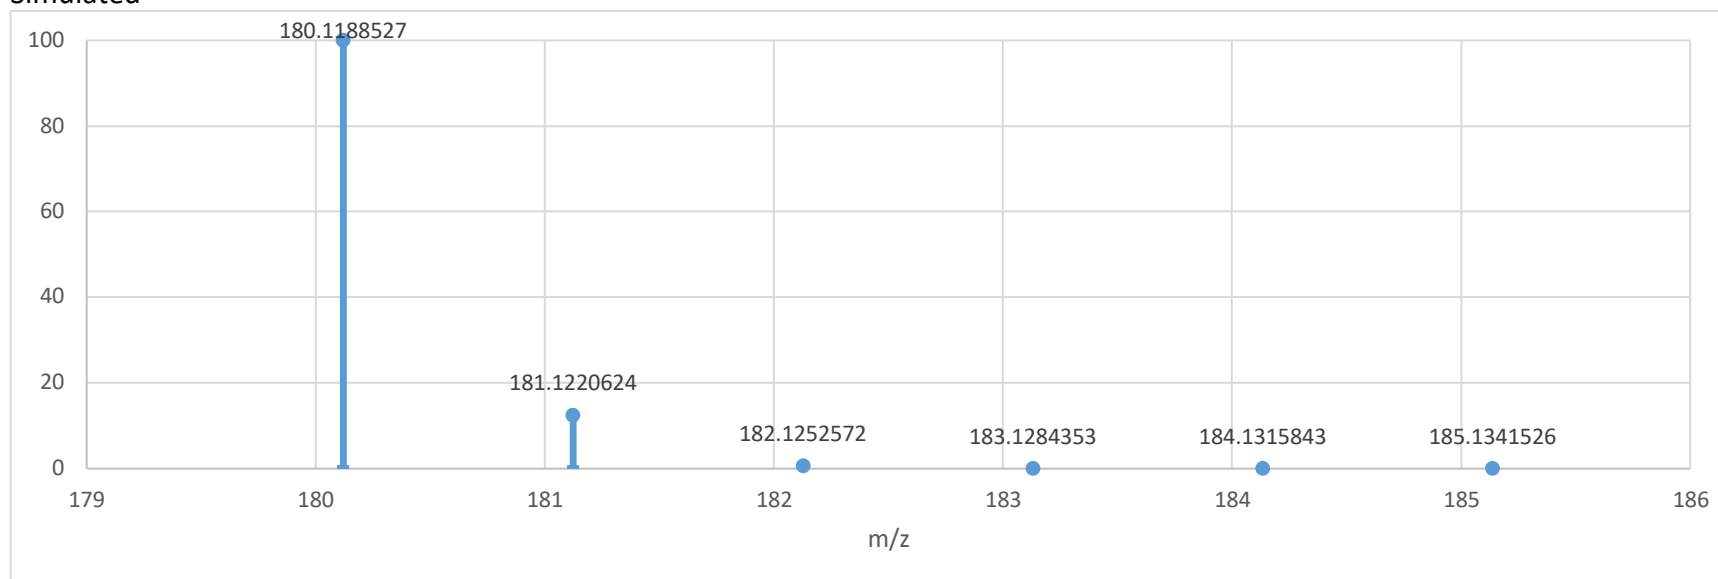



Measured

MS Zoomed Spectrum

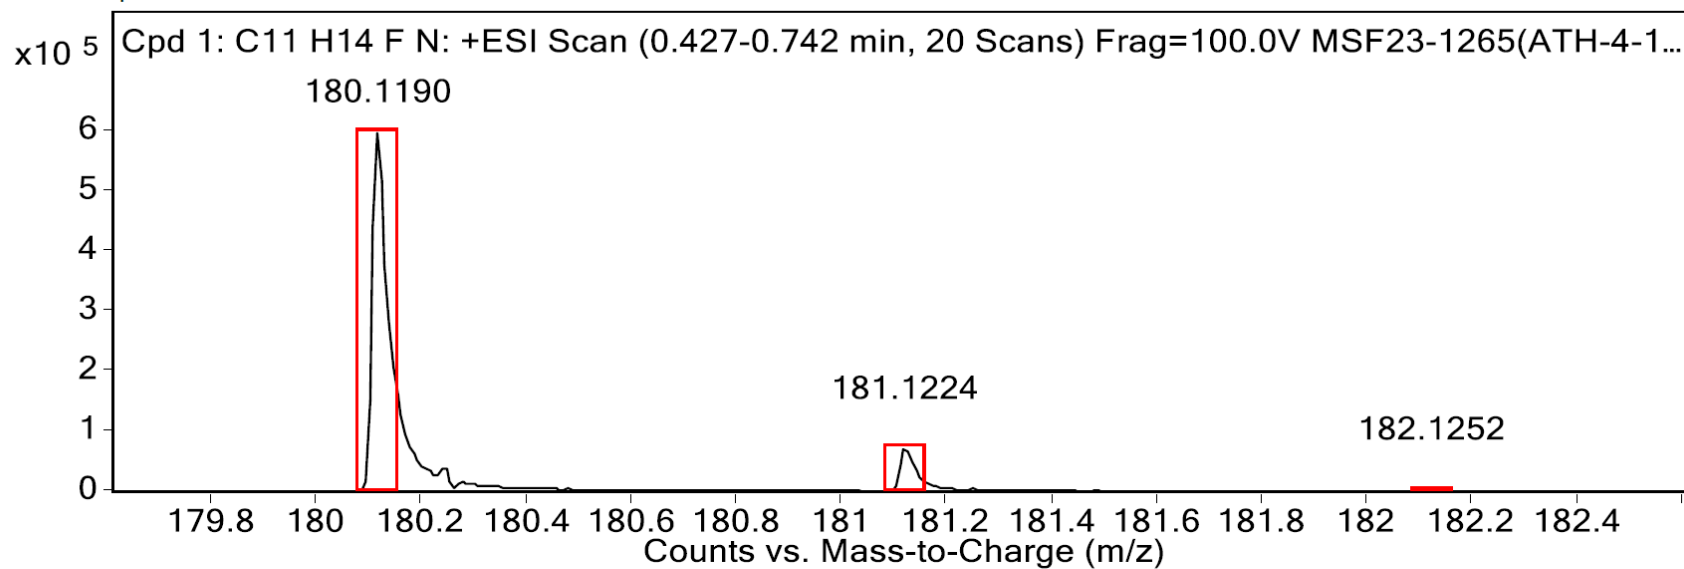

MS Spectrum Peak List

| Obs. m/z | Calc. m/z | Charge | Abundance | Formula                            | Ion Species        | Tgt Mass Error (ppm) |
|----------|-----------|--------|-----------|------------------------------------|--------------------|----------------------|
| 163.0927 |           |        | 11743325  |                                    |                    |                      |
| 180.1190 | 180.1183  | 1      | 601519    | C <sub>11</sub> H <sub>14</sub> FN | (M+H) <sup>+</sup> | -3.84                |
| 181.1224 | 181.1215  | 1      | 73559     | C <sub>11</sub> H <sub>14</sub> FN | (M+H) <sup>+</sup> | -5.07                |
| 182.1252 | 182.1247  | 1      | 5551      | C <sub>11</sub> H <sub>14</sub> FN | (M+H) <sup>+</sup> | -2.85                |

--- End Of Report ---

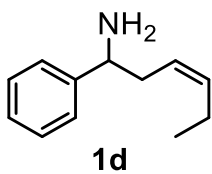

HR-MS (ESI-TOF)  $m/z$ :  $[M+H]^+$  calculated for  $C_{12}H_{18}N^+$ , 176.1439; found,  $z$  176.1440.

Simulated

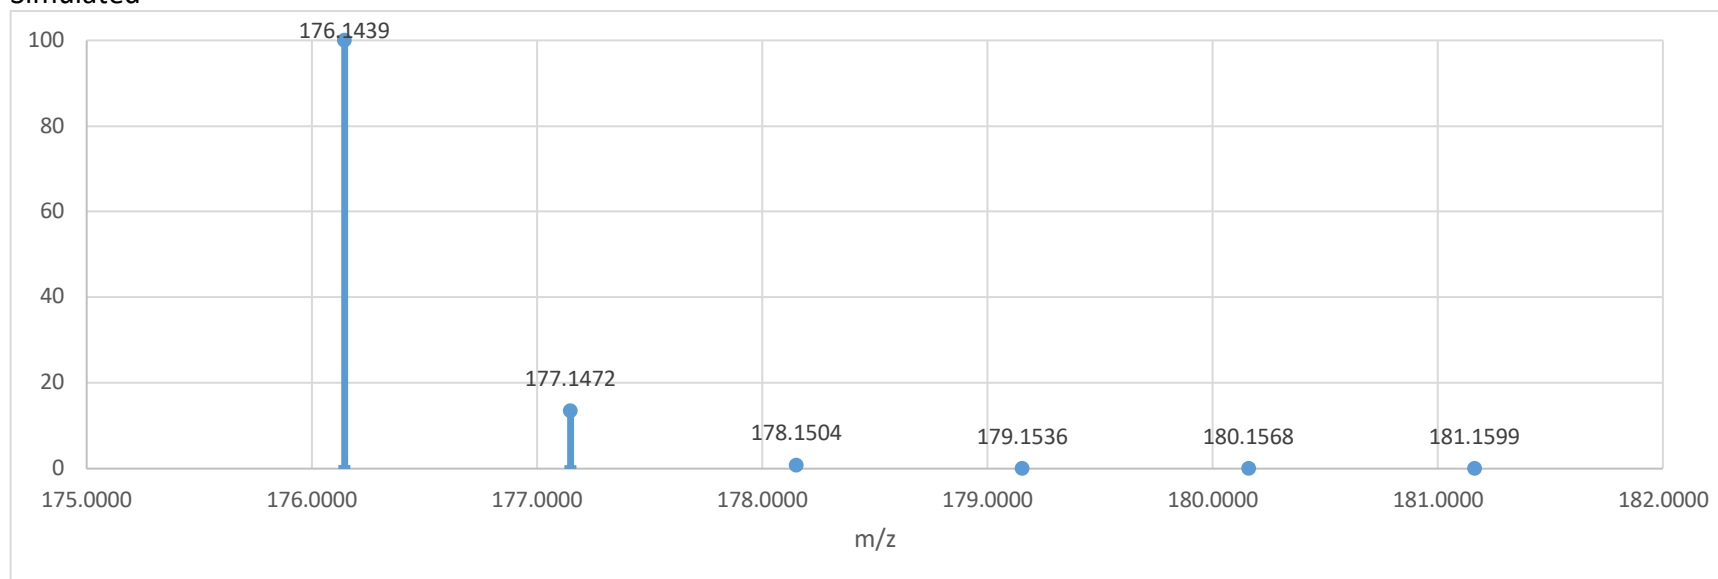

## Measured

Monoisotopic Mass, Even Electron Ions

58 formula(e) evaluated with 1 results within limits (up to 50 closest results for each mass)

Elements Used:

C: 0-200 H: 0-200 N: 0-6 Na: 0-1 Br: 0-1

c12h17n

Qtof\_69275 59 (2.235) AM (Cen,5, 80.00, Ar,14000.0,558.36,0.70,LS 5); Sm (SG, 2x5.00); Cm (56:60)

1: TOF MS ES+  
3.41e+003

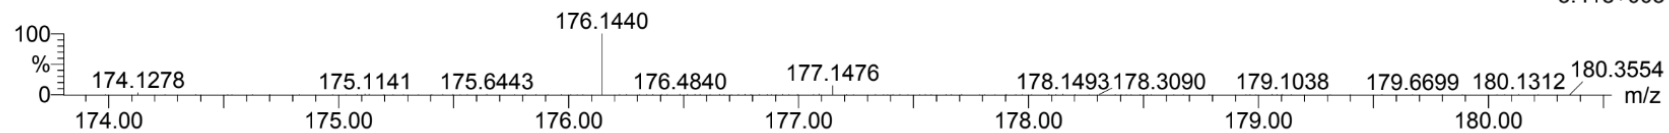

Minimum:

Maximum: 5.0 5.0 -1.5 100.0

| Mass     | Calc. Mass | mDa | PPM | DBE | i-FIT | Formula   |
|----------|------------|-----|-----|-----|-------|-----------|
| 176.1440 | 176.1439   | 0.1 | 0.6 | 4.5 | 1.8   | C12 H18 N |

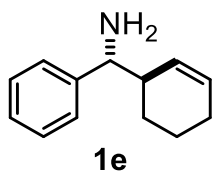

HR-MS (ESI-TOF)  $m/z$ :  $[M+H]^+$  calculated for  $C_{13}H_{18}N^+$ , 188.1439; found, 188.1445.

Simulated

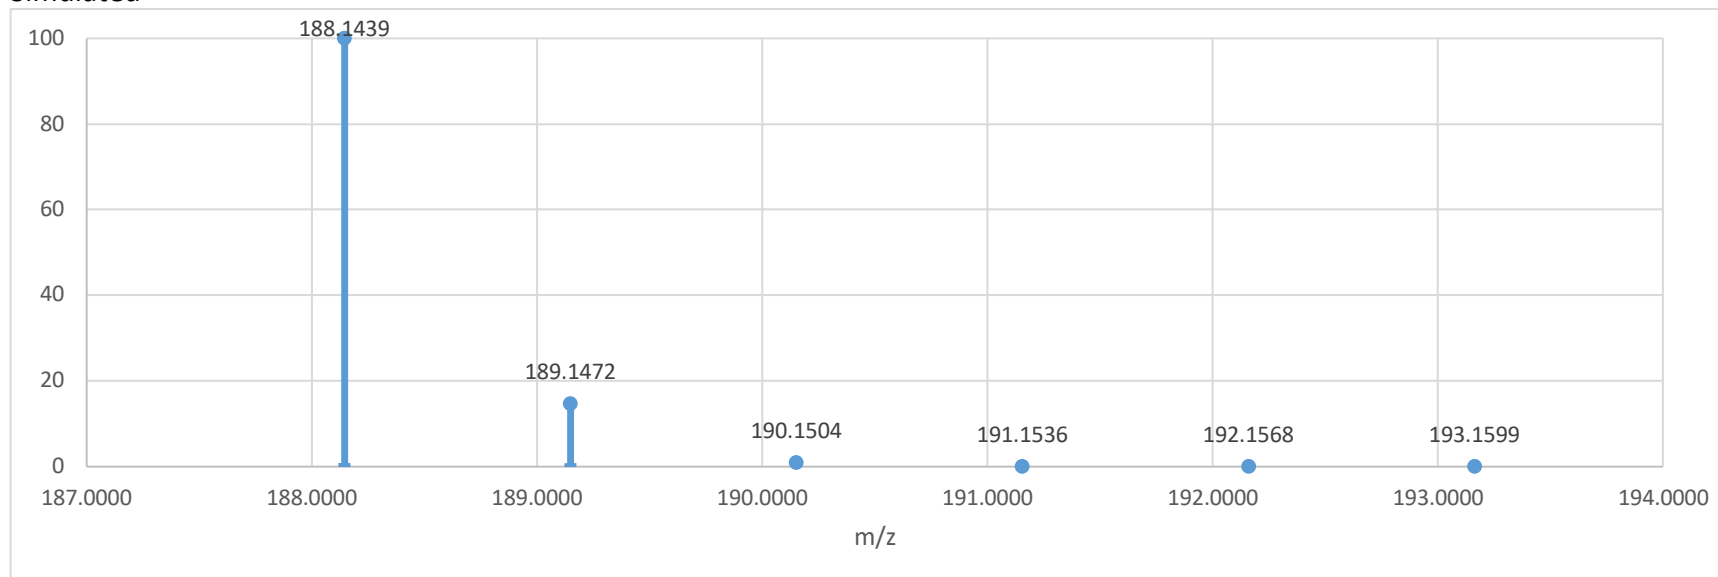

Measured

Monoisotopic Mass, Even Electron Ions

39 formula(e) evaluated with 1 results within limits (up to 50 closest results for each mass)

Elements Used:

C: 0-200 H: 0-200 N: 0-6 Na: 0-1

ev-e-cyen

Qtof\_69267 73 (2.796) AM (Cen,5, 80.00, Ar,14000.0,558.36,0.70,LS 5); Sm (SG, 2x5.00); Cm (73:78)

1: TOF MS ES+  
3.50e+003

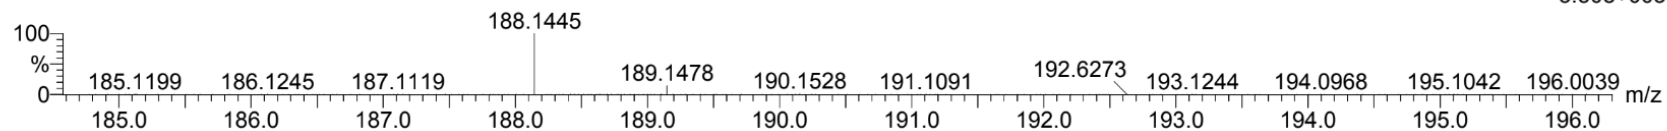

Minimum: -1.5  
Maximum: 5.0 5.0 100.0

| Mass     | Calc. Mass | mDa | PPM | DBE | i-FIT | Formula   |
|----------|------------|-----|-----|-----|-------|-----------|
| 188.1445 | 188.1439   | 0.6 | 3.2 | 5.5 | 1.3   | C13 H18 N |

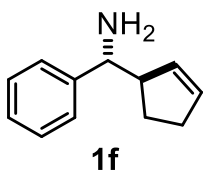

HR-MS (ESI-TOF)  $m/z$ :  $[M+H]^+$  calculated for  $C_{12}H_{16}N^+$ , 174.1277; found, 174.1277

Simulated

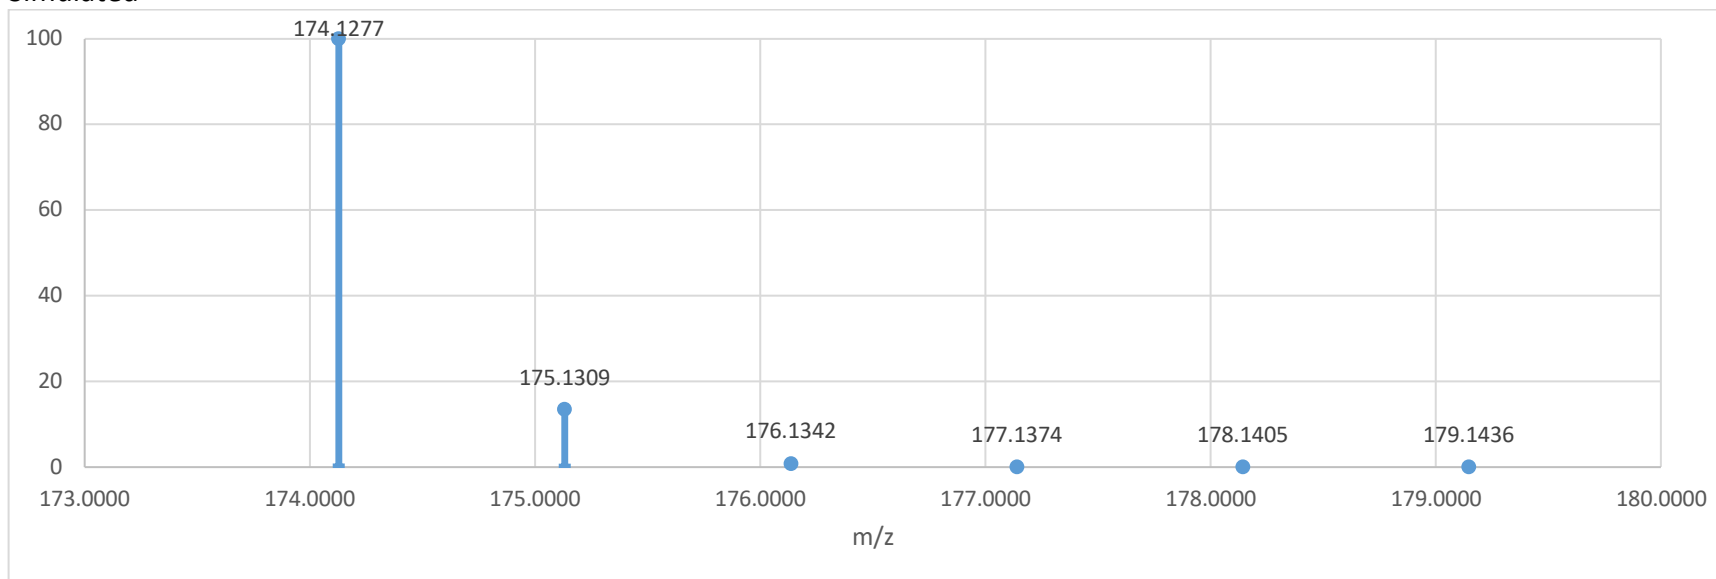

Measured

Monoisotopic Mass, Even Electron Ions

37 formula(e) evaluated with 1 results within limits (up to 50 closest results for each mass)

Elements Used:

C: 0-200 H: 0-200 N: 0-6 Na: 0-1

ev-e-cyp

Qtof\_69268 58 (2.217) AM (Cen,5, 80.00, Ar,14000.0,558.36,0.70,LS 5); Sm (SG, 2x5.00); Cm (55:58)

1: TOF MS ES+  
6.02e+002

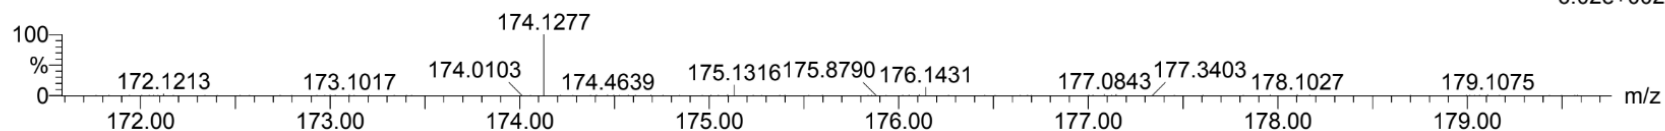

Minimum: -1.5  
Maximum: 5.0 5.0 100.0

| Mass     | Calc. Mass | mDa  | PPM  | DBE | i-FIT | Formula   |
|----------|------------|------|------|-----|-------|-----------|
| 174.1277 | 174.1283   | -0.6 | -3.4 | 5.5 | 36.6  | C12 H16 N |

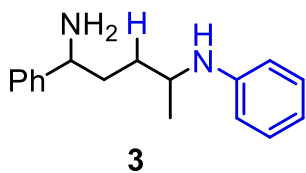

HR-MS (ESI-TOF)  $m/z$ :  $[M+H]^+$  calculated for  $C_{17}H_{23}N_2^+$ , 255.1856; found, 255.1864.

Simulated

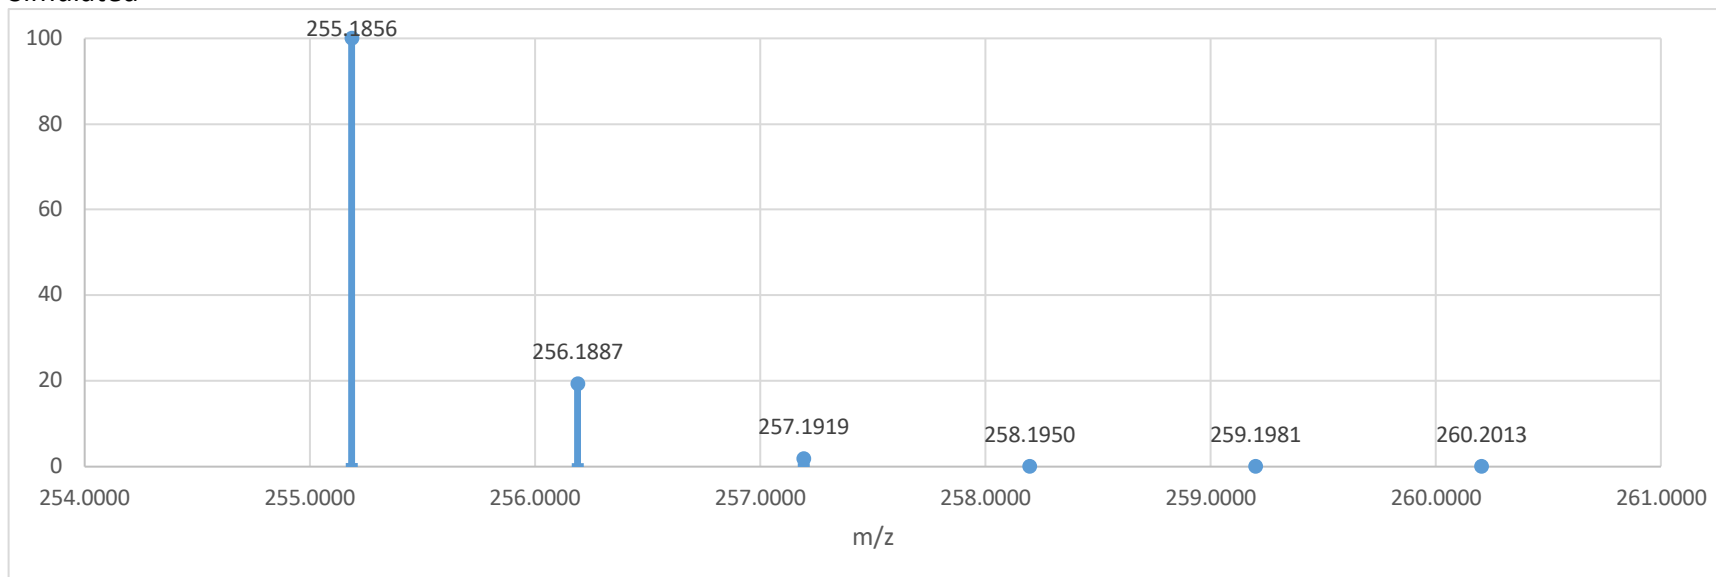



Measured

Monoisotopic Mass, Even Electron Ions

225 formula(e) evaluated with 1 results within limits (up to 50 closest results for each mass)

Elements Used:

C: 0-200 H: 0-200 N: 0-5 O: 0-5 Na: 0-1

1370-6-z-me-an

Qtof\_68319 74 (2.830) AM (Cen,5, 80.00, Ar,14000.0,558.36,0.70,LS 5); Sm (SG, 2x5.00); Cm (74:79)

1: TOF MS ES+  
2.61e+003

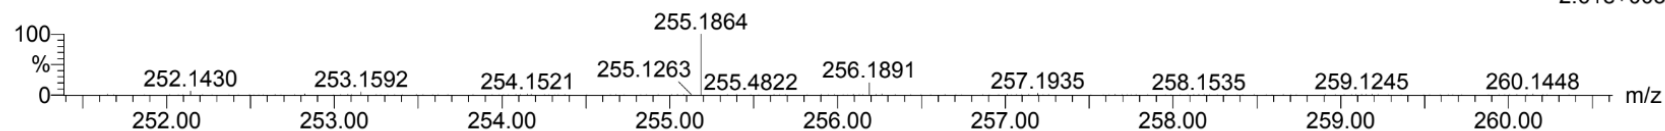

Minimum: -1.5  
Maximum: 5.0 5.0 100.0

| Mass     | Calc. Mass | mDa | PPM | DBE | i-FIT | Formula    |
|----------|------------|-----|-----|-----|-------|------------|
| 255.1864 | 255.1861   | 0.3 | 1.2 | 7.5 | 1.7   | C17 H23 N2 |

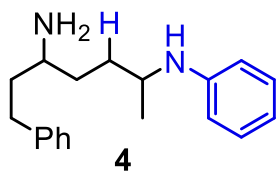

HR-MS (ESI-TOF)  $m/z$ :  $[M+H]^+$  calculated for  $C_{19}H_{27}N_2^+$ , 283.2169; found mass, 283.2163.

Simulated

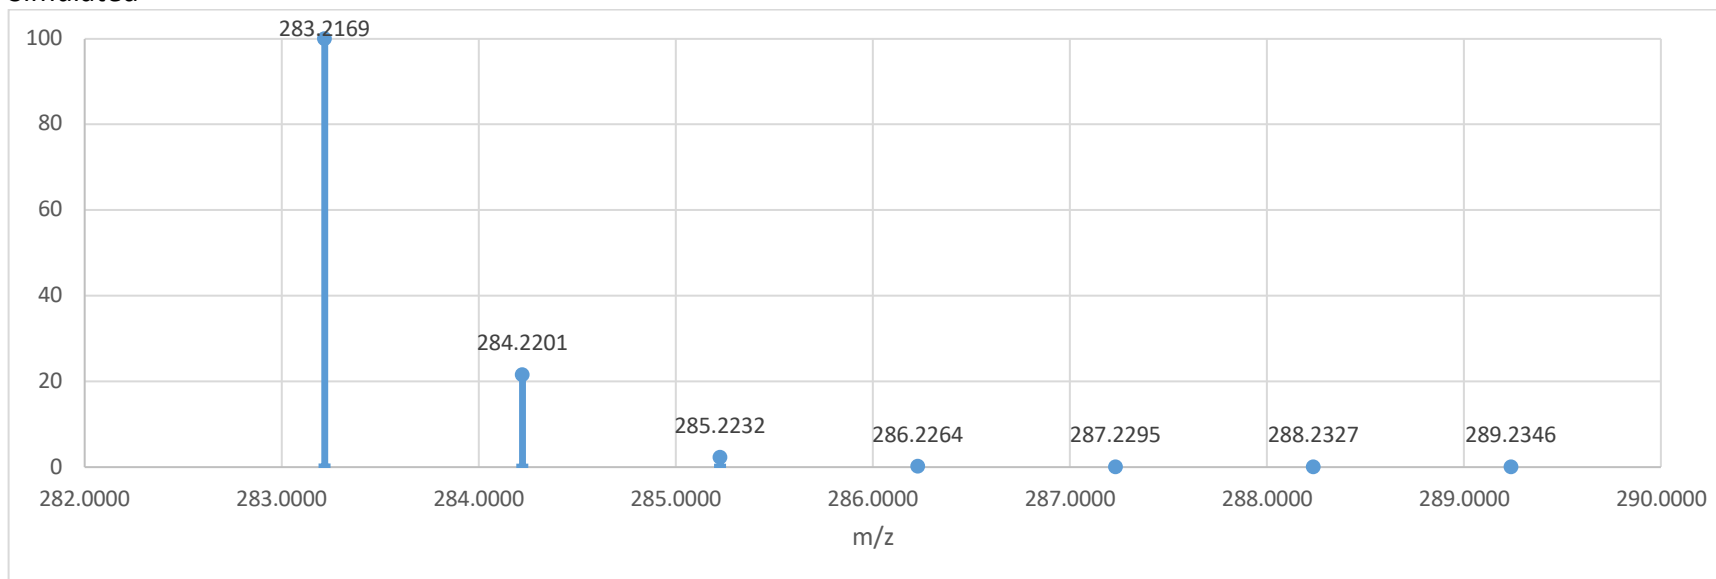

Measured

Monoisotopic Mass, Even Electron Ions

249 formula(e) evaluated with 2 results within limits (up to 50 closest results for each mass)

Elements Used:

C: 0-200 H: 0-200 N: 0-5 O: 0-5 Na: 0-1

1392-an-hcinn

Qtof\_68321\_46 (1.775) AM (Cen,5, 80.00, Ar,14000.0,558.36,0.70,LS 5); Sm (SG, 2x5.00); Cm (45:46)

1: TOF MS ES+  
4.05e+003

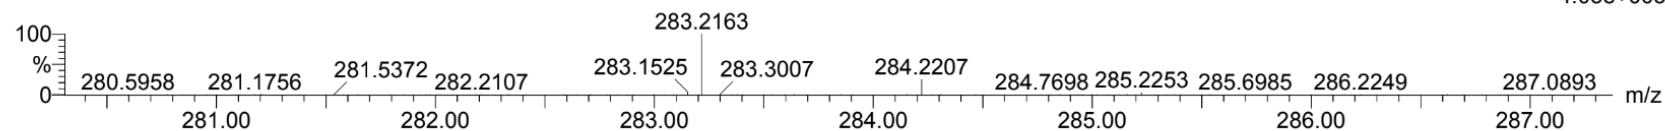

Minimum: -1.5  
Maximum: 5.0 5.0 100.0

| Mass     | Calc. Mass | mDa  | PPM  | DBE | i-FIT | Formula       |
|----------|------------|------|------|-----|-------|---------------|
| 283.2163 | 283.2174   | -1.1 | -3.9 | 7.5 | 10.1  | C19 H27 N2    |
|          | 283.2150   | 1.3  | 4.6  | 4.5 | 28.5  | C17 H28 N2 Na |

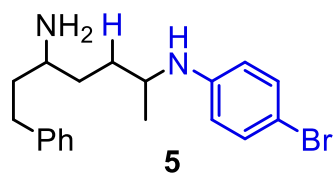

HR-MS (ESI-TOF)  $m/z$ :  $[M+H]^+$  calculated for  $C_{19}H_{26}N_2Br^+$ , 361.1279; found, 361.1274.

Simulated

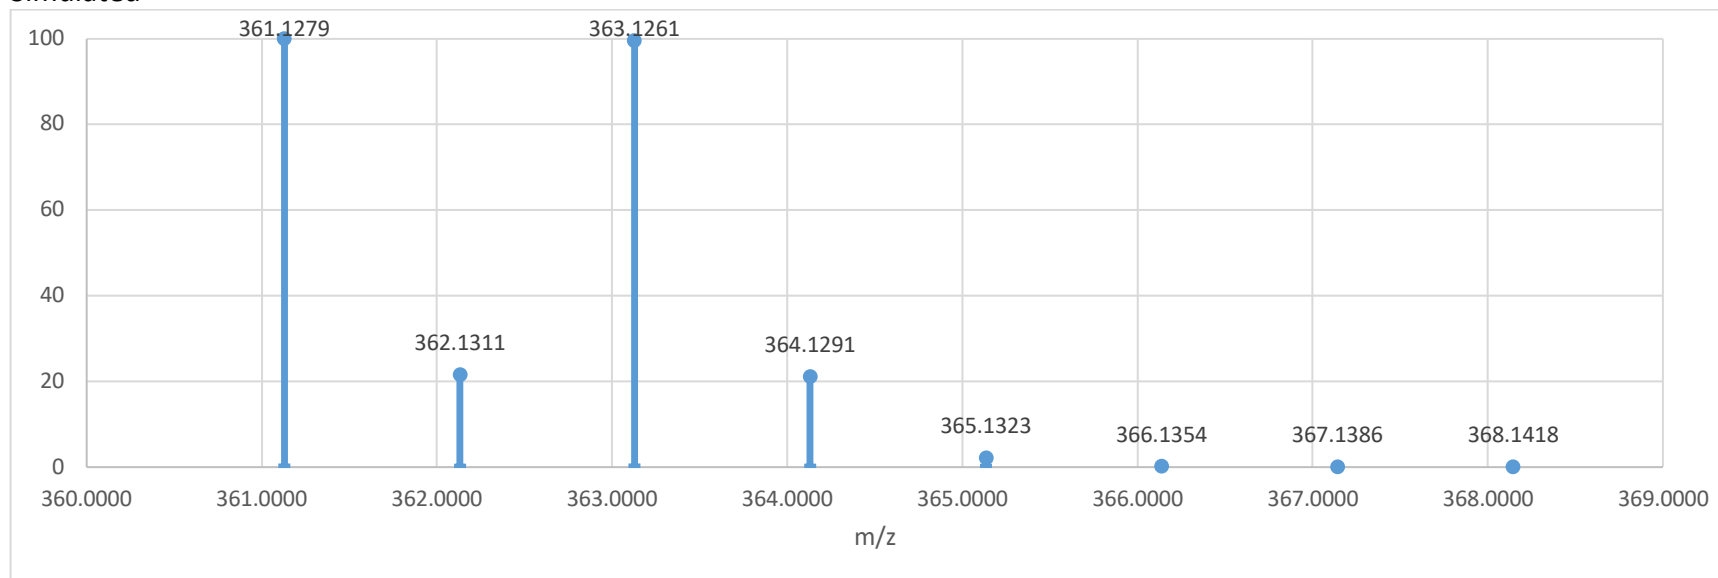

## Measured

Monoisotopic Mass, Even Electron Ions

122 formula(e) evaluated with 1 results within limits (up to 50 closest results for each mass)

Elements Used:

C: 0-200 H: 0-200 N: 0-6 Na: 0-1 Br: 0-1

ev-e-hcinn-4br

Qtof\_69270 71 (2.694) AM (Cen,5, 80.00, Ar,14000.0,558.36,0.70,LS 5); Sm (SG, 2x5.00); Cm (71:72)

1: TOF MS ES+  
1.49e+003

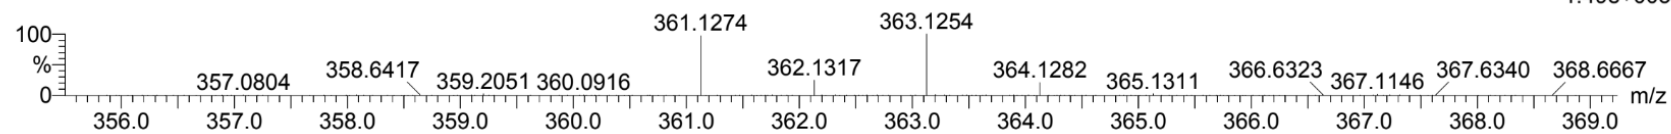

Minimum: -1.5  
Maximum: 5.0 5.0 100.0

| Mass     | Calc. Mass | mDa  | PPM  | DBE | i-FIT | Formula       |
|----------|------------|------|------|-----|-------|---------------|
| 361.1274 | 361.1279   | -0.5 | -1.4 | 7.5 | 2.0   | C19 H26 N2 Br |

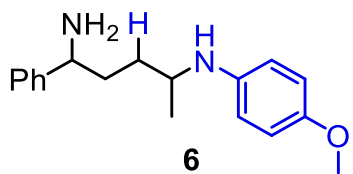

HR-MS (ESI-TOF)  $m/z$ :  $[M+H]^+$  calculated for  $C_{18}H_{25}N_2O^+$ , 285.1967; found, 285.1965.

Simulated

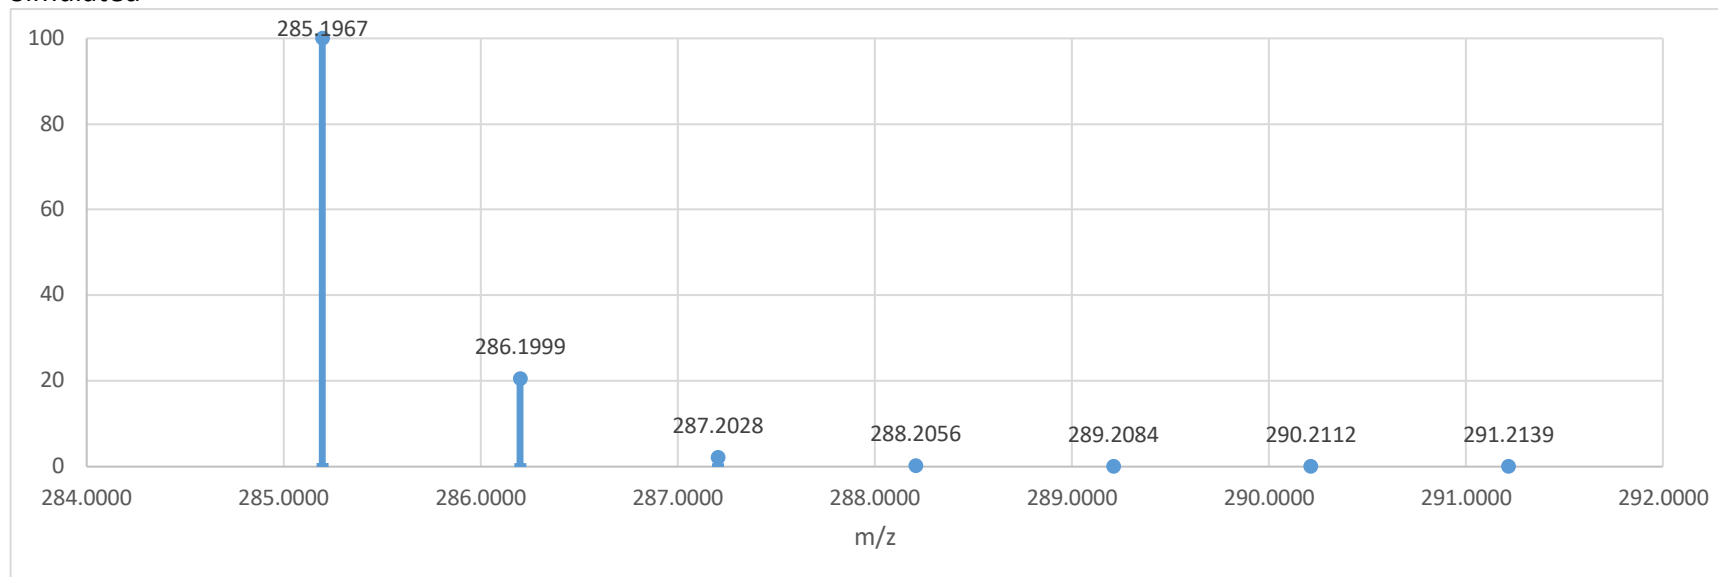

Measured

Monoisotopic Mass, Even Electron Ions

251 formula(e) evaluated with 1 results within limits (up to 50 closest results for each mass)

Elements Used:

C: 0-200 H: 0-200 N: 0-5 O: 0-5 Na: 0-1

1394-z-me-meo

Qtof\_68324 57 (2.183) AM (Cen,5, 80.00, Ar,14000.0,558.36,0.70,LS 5); Sm (SG, 2x5.00); Cm (55:57)

1: TOF MS ES+  
5.62e+003

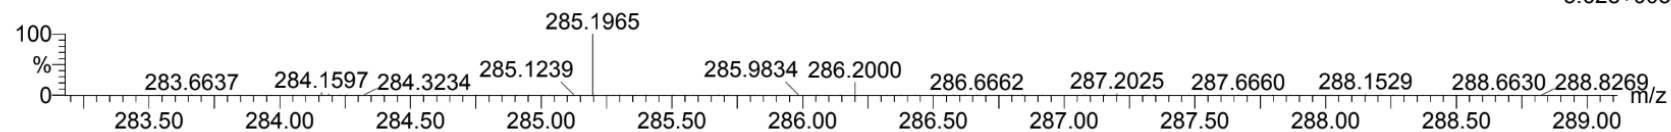

Minimum: -1.5  
Maximum: 5.0 5.0 100.0

| Mass     | Calc. Mass | mDa  | PPM  | DBE | i-FIT | Formula      |
|----------|------------|------|------|-----|-------|--------------|
| 285.1965 | 285.1967   | -0.2 | -0.7 | 7.5 | 2.0   | C18 H25 N2 O |

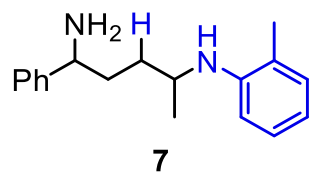

HR-MS (ESI-TOF)  $m/z$ :  $[M+H]^+$  calculated for  $C_{18}H_{25}N_2^+$ , 269.2012; found, 269.2017

Simulated

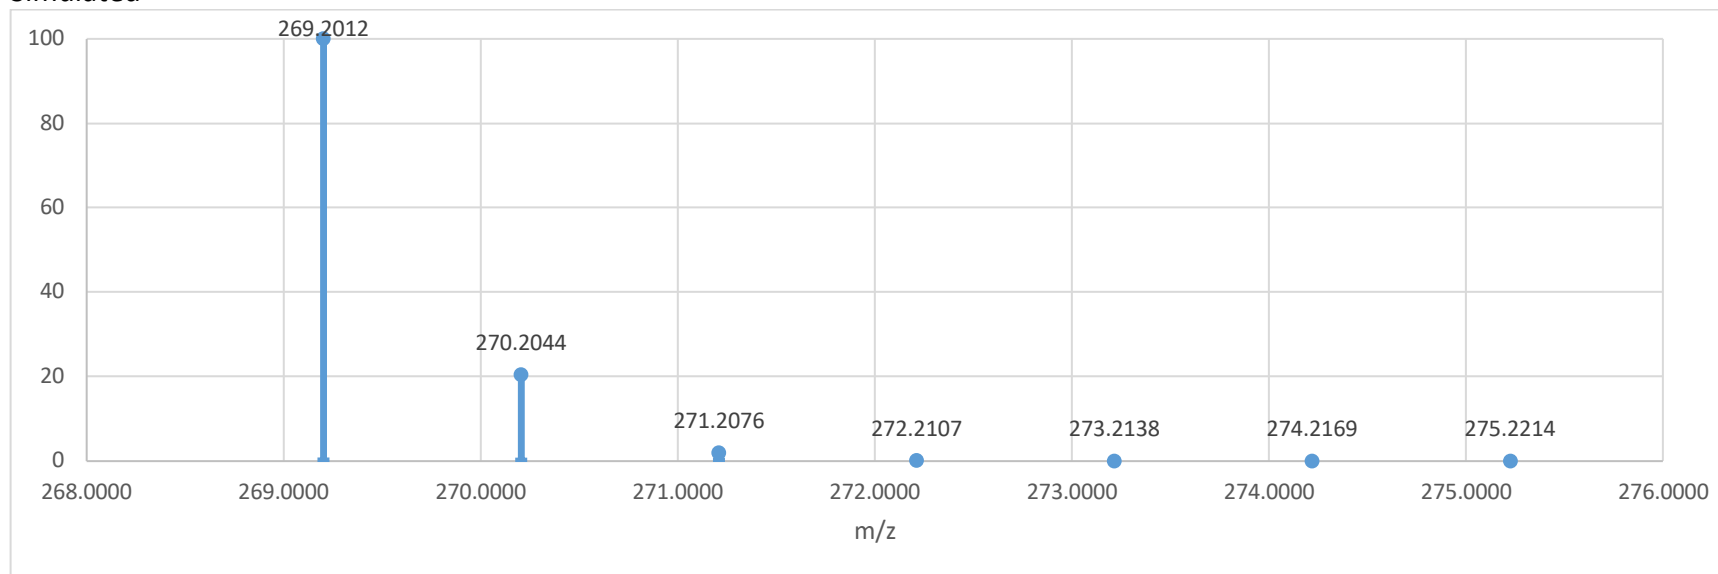



Measured

Monoisotopic Mass, Even Electron Ions

269 formula(e) evaluated with 1 results within limits (up to 50 closest results for each mass)

Elements Used:

C: 0-200 H: 0-200 N: 0-5 O: 0-6 Na: 0-1

Z-Me-oTol2

Qtof\_68337 57 (2.183) AM (Cen,5, 80.00, Ar,14000.0,558.36,0.70,LS 5); Sm (SG, 2x5.00); Cm (54:60)

1: TOF MS ES+  
2.87e+003

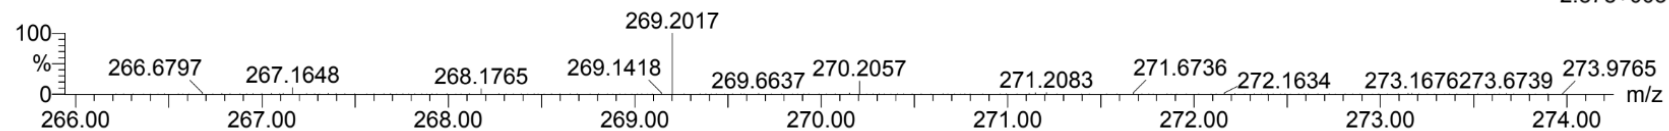

Minimum: -1.5  
Maximum: 5.0 5.0 100.0

| Mass     | Calc. Mass | mDa  | PPM  | DBE | i-FIT | Formula    |
|----------|------------|------|------|-----|-------|------------|
| 269.2017 | 269.2018   | -0.1 | -0.4 | 7.5 | 1.2   | C18 H25 N2 |

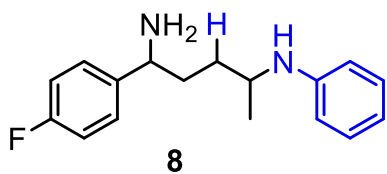

HR-MS (ESI-TOF)  $m/z$ :  $[M+H]^+$  calculated for  $C_{17}H_{22}FN_2^+$ , 273.1762; found, 273.1759.

Simulated

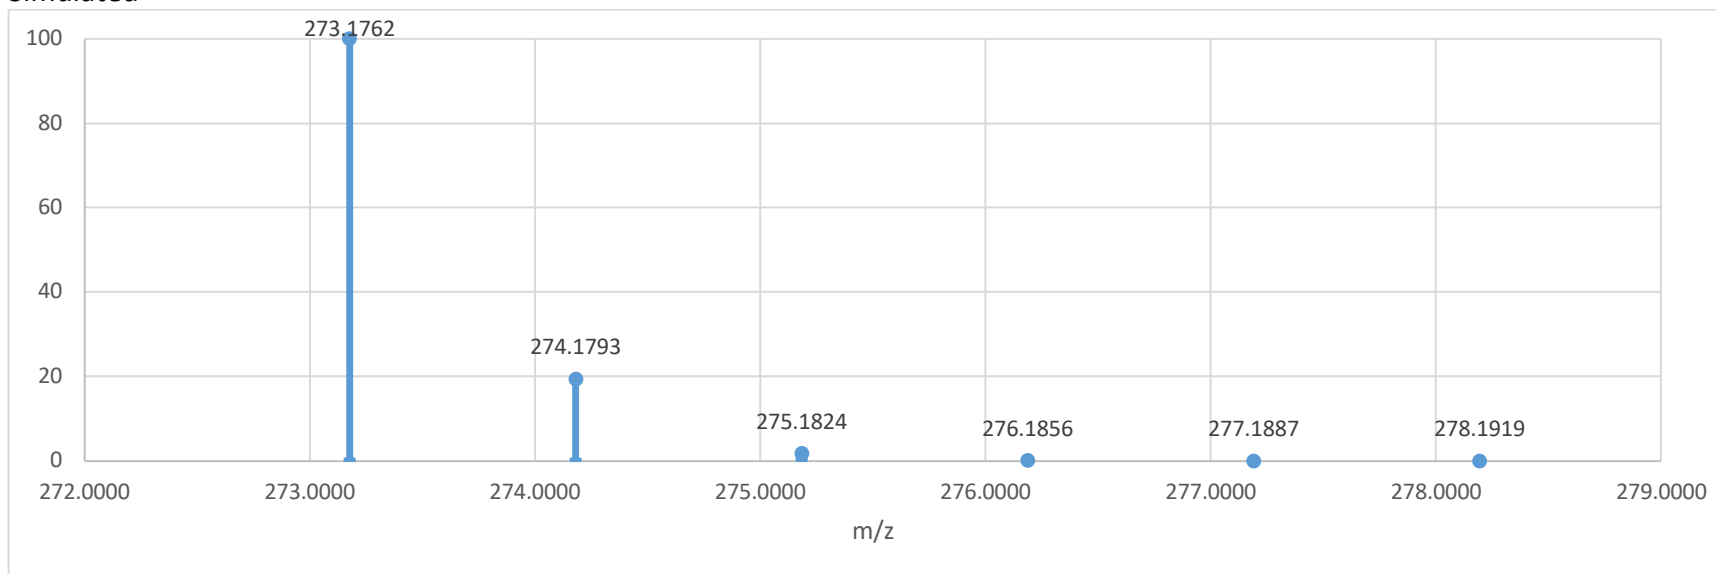

Measured

MS Zoomed Spectrum

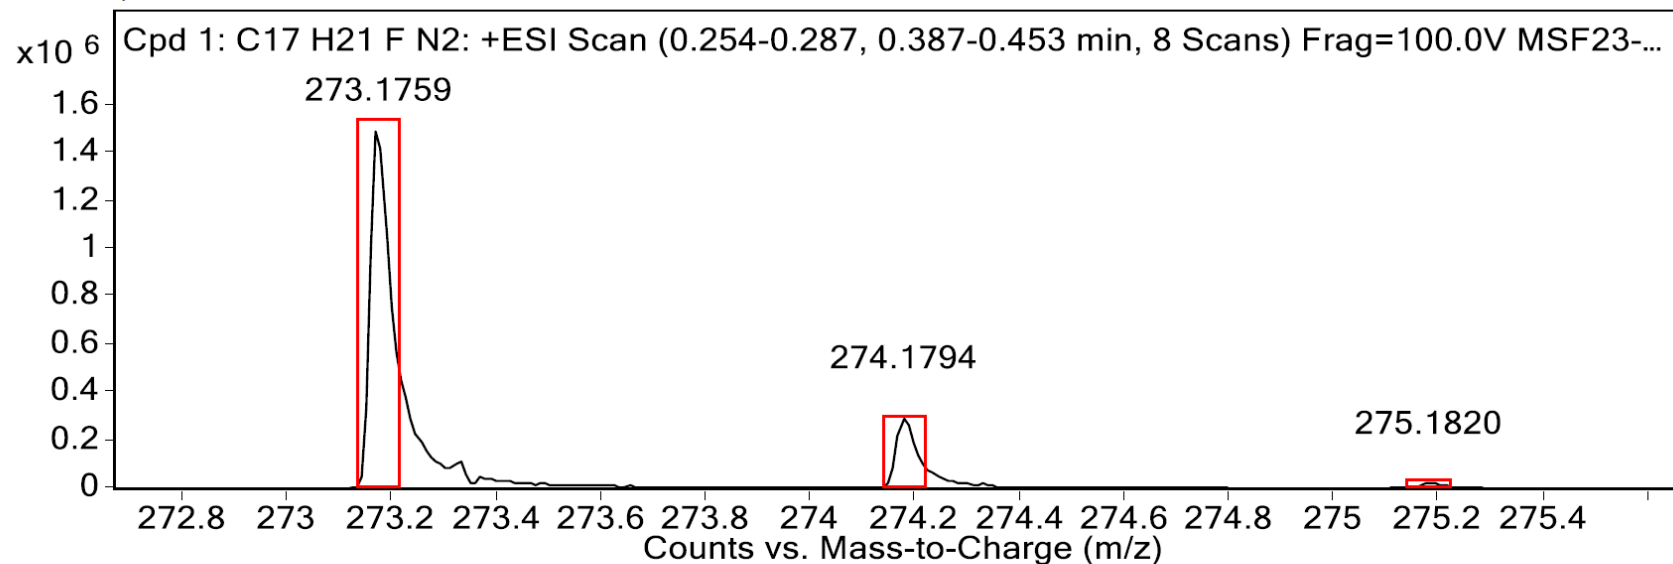

MS Spectrum Peak List

| Obs. m/z | Calc. m/z | Charge | Abundance | Formula   | Ion Species | Tgt Mass Error (ppm) |
|----------|-----------|--------|-----------|-----------|-------------|----------------------|
| 273.1759 | 273.1762  | 1      | 1530428   | C17H21FN2 | (M+H)+      | 1.07                 |
| 274.1794 | 274.1793  | 1      | 300359    | C17H21FN2 | (M+H)+      | -0.37                |
| 275.1820 | 275.1824  | 1      | 26914     | C17H21FN2 | (M+H)+      | 1.61                 |
| 276.1970 | 276.1856  | 1      | 2327      | C17H21FN2 | (M+H)+      | -41.53               |

--- End Of Report ---

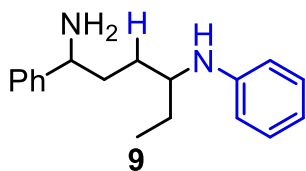

HR-MS (ESI-TOF)  $m/z$ :  $[M+H]^+$  calculated for  $C_{18}H_{25}N_2^+$ , 269.2018; found mass, 269.2019

### Simulated

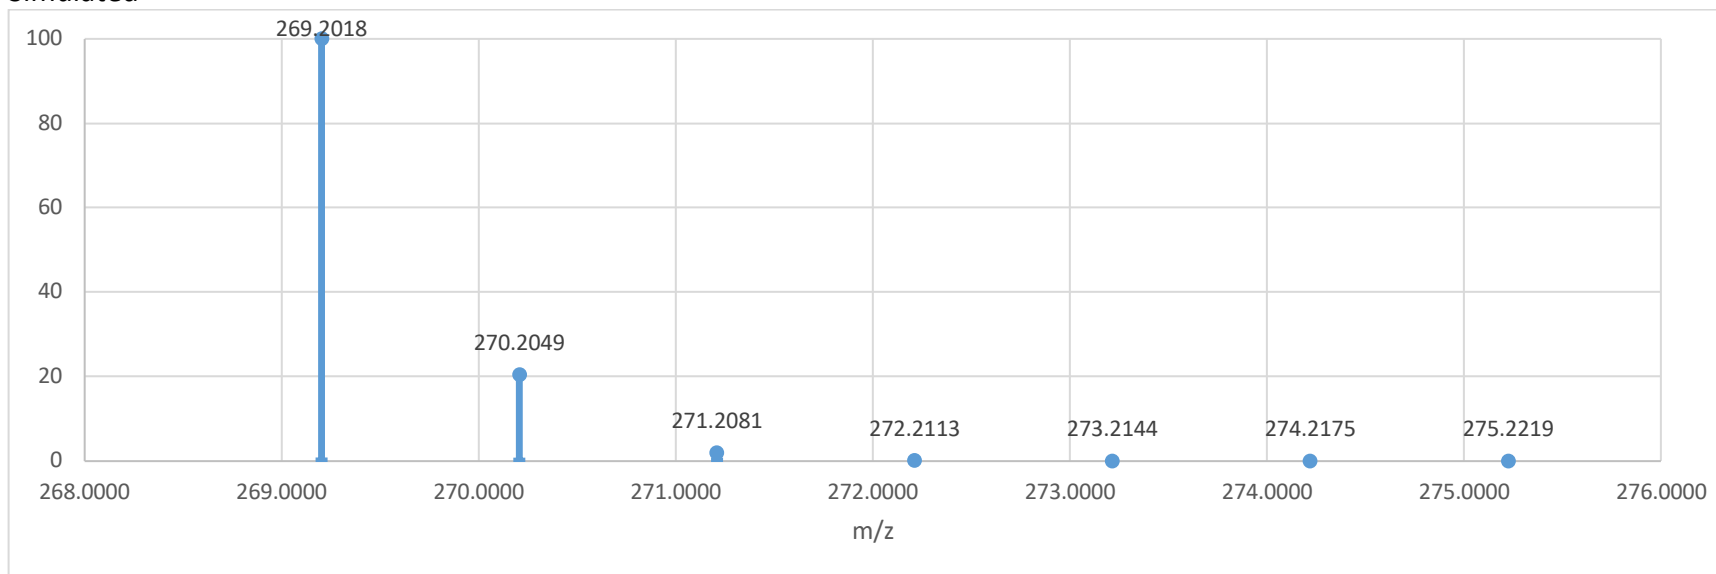

# Measured

Monoisotopic Mass, Even Electron Ions

237 formula(e) evaluated with 1 results within limits (up to 50 closest results for each mass)

Elements Used:

C: 0-200 H: 0-200 N: 0-5 O: 0-5 Na: 0-1

1380-z-et-an

Qtof\_68320 61 (2.319) AM (Cen,5, 80.00, Ar,14000.0,558.36,0.70,LS 5); Sm (SG, 2x5.00); Cm (61:66)

1: TOF MS ES+  
1.40e+004

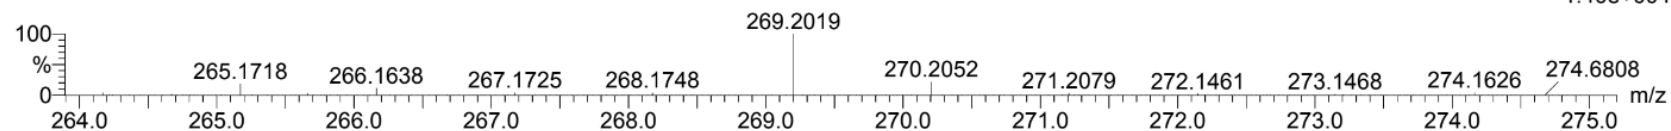

Minimum: -1.5  
Maximum: 5.0 5.0 100.0

| Mass     | Calc. Mass | mDa | PPM | DBE | i-FIT | Formula    |
|----------|------------|-----|-----|-----|-------|------------|
| 269.2019 | 269.2018   | 0.1 | 0.4 | 7.5 | 2.0   | C18 H25 N2 |

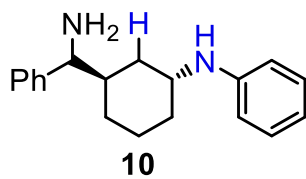

HR-MS (ESI-TOF)  $m/z$ :  $[M+H]^+$  calculated for  $C_{19}H_{25}N_2^+$ , 281.2012; found mass, 281.2013

Simulated

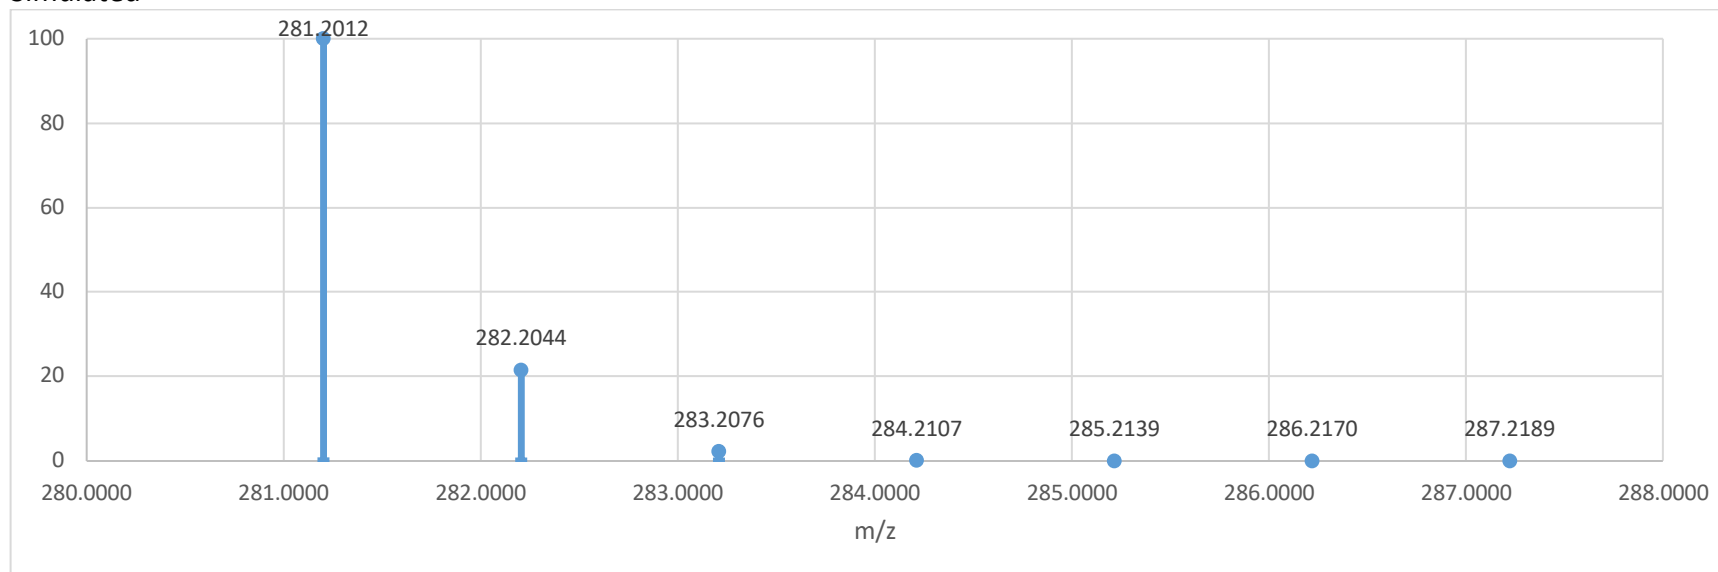

Measured

Monoisotopic Mass, Even Electron Ions

251 formula(e) evaluated with 1 results within limits (up to 50 closest results for each mass)

Elements Used:

C: 0-200 H: 0-200 N: 0-5 O: 0-5 Na: 0-1

ev-e-cyen-an

Qtof\_70102 61 (2.319) AM (Cen,5, 80.00, Ar,14000.0,734.47,0.70,LS 5); Sm (SG, 2x5.00); Cm (58:61)

1: TOF MS ES+  
1.99e+003

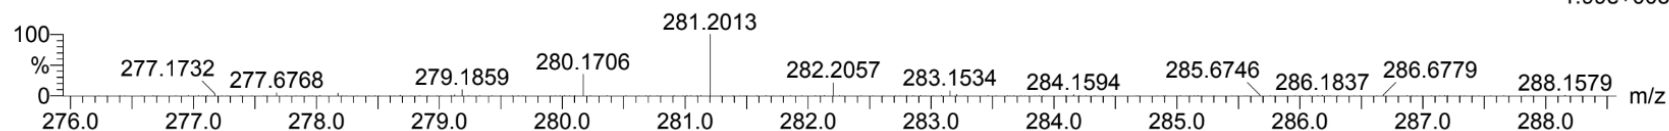

Minimum: -1.5  
Maximum: 5.0 5.0 100.0

| Mass     | Calc. Mass | mDa  | PPM  | DBE | i-FIT | Formula    |
|----------|------------|------|------|-----|-------|------------|
| 281.2013 | 281.2018   | -0.5 | -1.8 | 8.5 | 2.4   | C19 H25 N2 |

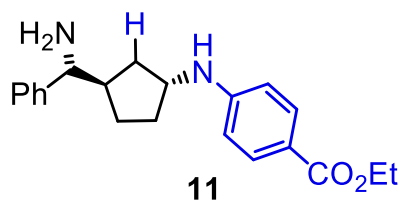

HR-MS (ESI-TOF)  $m/z$ :  $[\text{M}+\text{H}]^+$  calculated for  $\text{C}_{21}\text{H}_{27}\text{N}_2\text{O}_2^+$ , 339.2073; found mass, 339.2071

### Simulated

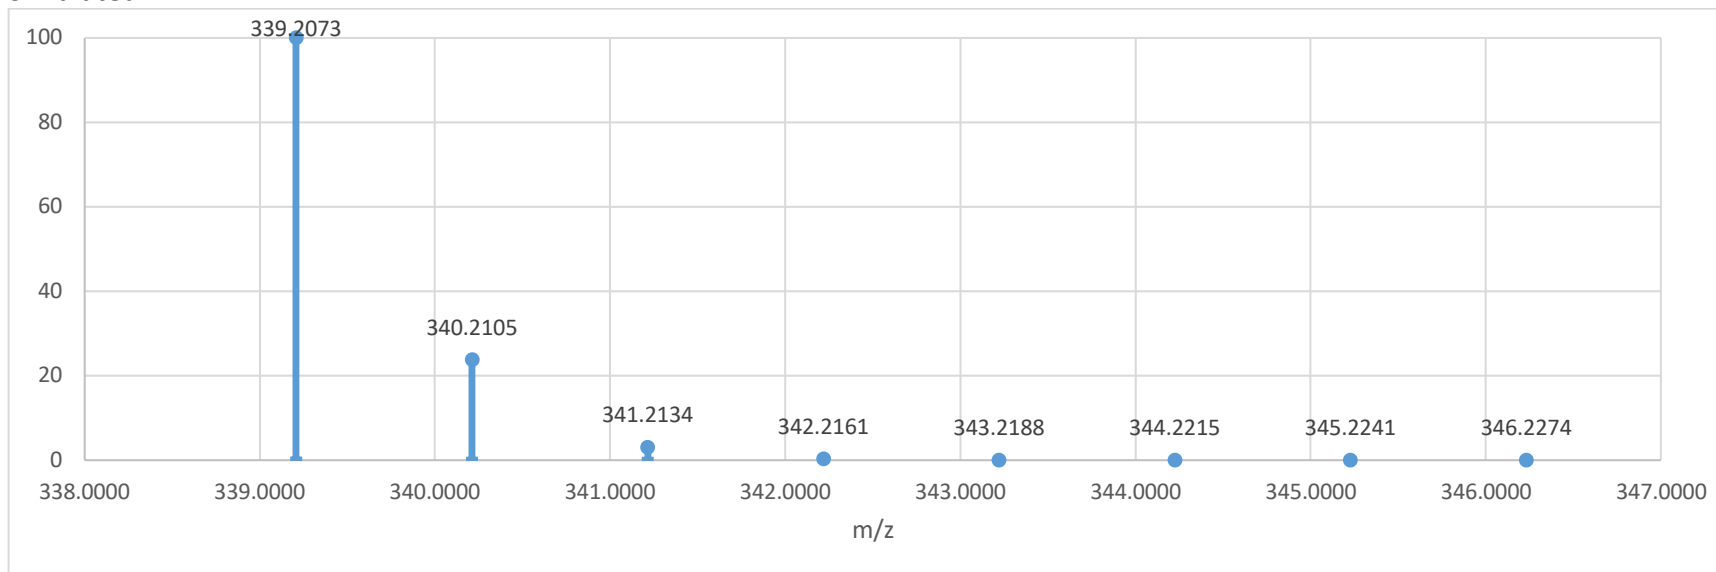



Measured

Monoisotopic Mass, Even Electron Ions

300 formula(e) evaluated with 1 results within limits (up to 50 closest results for each mass)

Elements Used:

C: 0-200 H: 0-200 N: 0-5 O: 0-5 Na: 0-1

cyp-ester

Qtof\_68332 50 (1.911) AM (Cen,5, 80.00, Ar,14000.0,558.36,0.70,LS 5); Sm (SG, 2x5.00); Cm (48:50)

1: TOF MS ES+  
5.51e+003

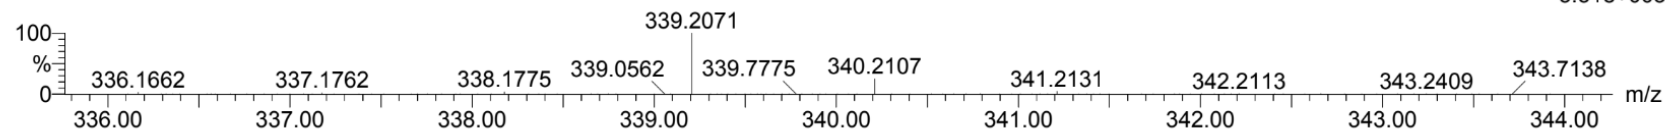

Minimum: -1.5  
Maximum: 5.0 5.0 100.0

| Mass     | Calc. Mass | mDa  | PPM  | DBE | i-FIT | Formula       |
|----------|------------|------|------|-----|-------|---------------|
| 339.2071 | 339.2073   | -0.2 | -0.6 | 9.5 | 6.1   | C21 H27 N2 O2 |

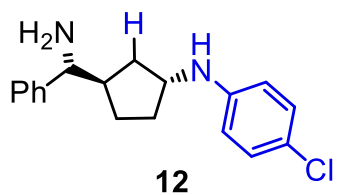

HR-MS (ESI-TOF)  $m/z$ :  $[M+H]^+$  calculated for  $C_{18}H_{22}N_2Cl^+$ , 301.1466; found mass, 301.1465

Simulated

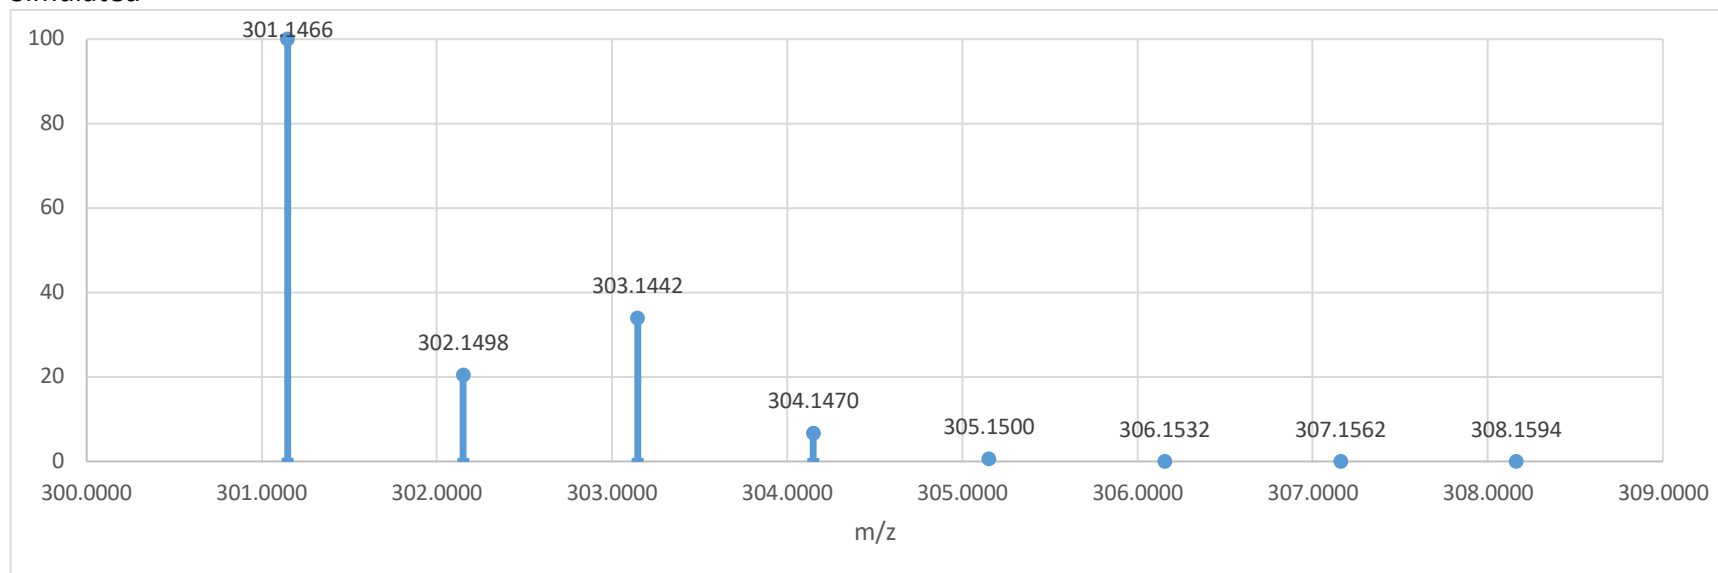

## Measured

Monoisotopic Mass, Even Electron Ions

500 formula(e) evaluated with 2 results within limits (up to 50 closest results for each mass)

Elements Used:

C: 0-200 H: 0-200 N: 0-5 O: 0-5 Na: 0-1 Cl: 0-1

cyp-4cl

Qtof\_68330 59 (2.251) AM (Cen,5, 80.00, Ar,14000.0,558.36,0.70,LS 5); Sm (SG, 2x5.00); Cm (55:63)

1: TOF MS ES+  
4.81e+003

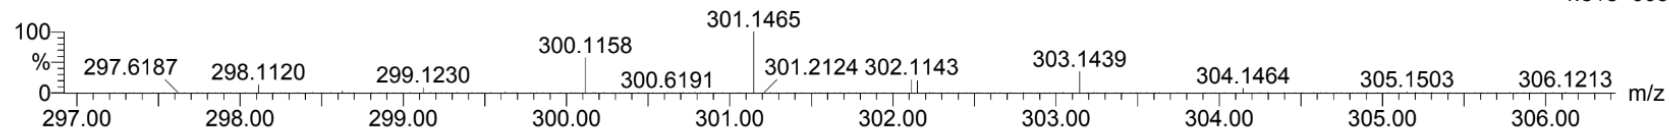

Minimum:

Maximum:

5.0      5.0      -1.5  
100.0

| Mass     | Calc. Mass | mDa  | PPM  | DBE  | i-FIT | Formula       |
|----------|------------|------|------|------|-------|---------------|
| 301.1465 | 301.1472   | -0.7 | -2.3 | 8.5  | 3.9   | C18 H22 N2 Cl |
|          | 301.1453   | 1.2  | 4.0  | 13.5 | 741.6 | C19 H17 N4    |

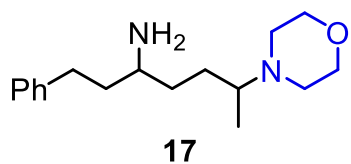

HR-MS (ESI-TOF)  $m/z$ :  $[M+H]^+$  calculated for  $C_{17}H_{29}N_2O^+$ , 277.2274; found mass, 277.2267.

Simulated

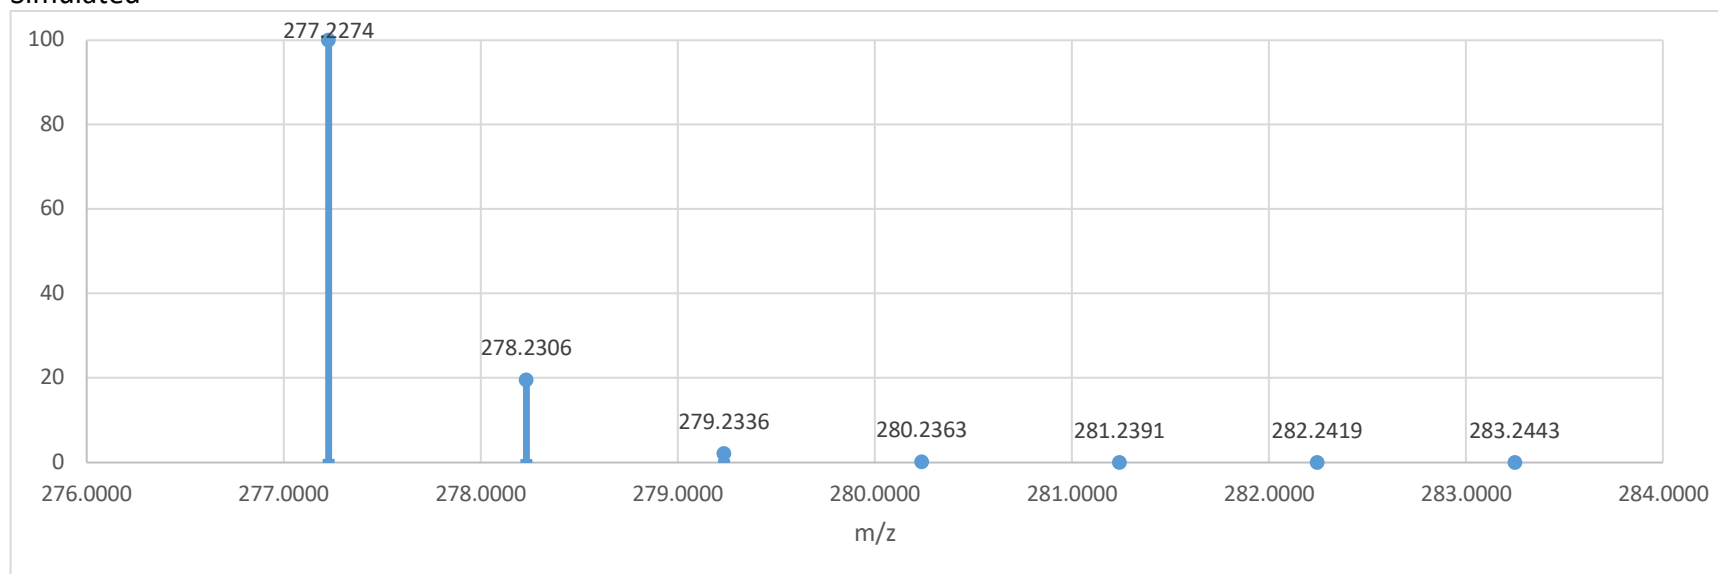

Measured

Monoisotopic Mass, Even Electron Ions

245 formula(e) evaluated with 2 results within limits (up to 50 closest results for each mass)

Elements Used:

C: 0-200 H: 0-200 N: 0-5 O: 0-5 Na: 0-1

1392-morph-hcinn

Qtof\_68322 71 (2.693) AM (Cen,5, 80.00, Ar,14000.0,558.36,0.70,LS 5); Sm (SG, 2x5.00); Cm (71:72)

1: TOF MS ES+  
4.09e+003

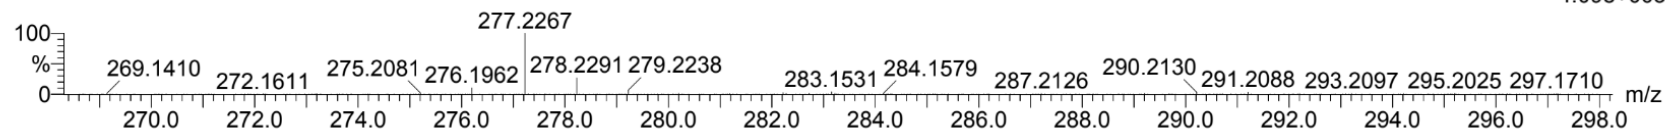

Minimum: -1.5  
Maximum: 5.0 5.0 100.0

| Mass     | Calc. Mass | mDa  | PPM  | DBE | i-FIT | Formula         |
|----------|------------|------|------|-----|-------|-----------------|
| 277.2267 | 277.2256   | 1.1  | 4.0  | 1.5 | 114.8 | C15 H30 N2 O Na |
|          | 277.2280   | -1.3 | -4.7 | 4.5 | 80.2  | C17 H29 N2 O    |

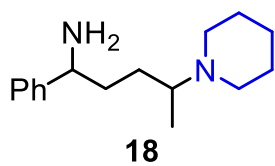

HR-MS (ESI-TOF)  $m/z$ :  $[M+H]^+$  calculated for  $C_{16}H_{27}N_2^+$ , 247.2174; found mass, 247.2176.

Simulated

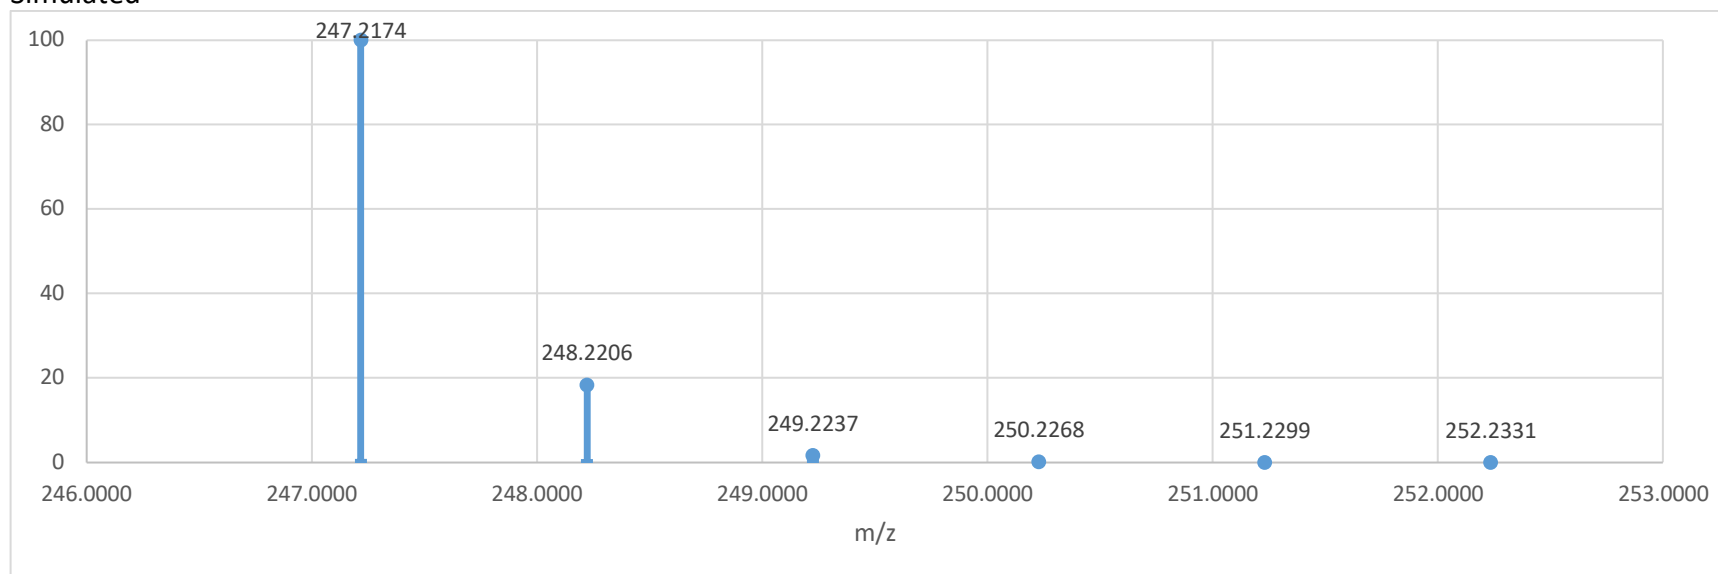

Measured

MS Zoomed Spectrum

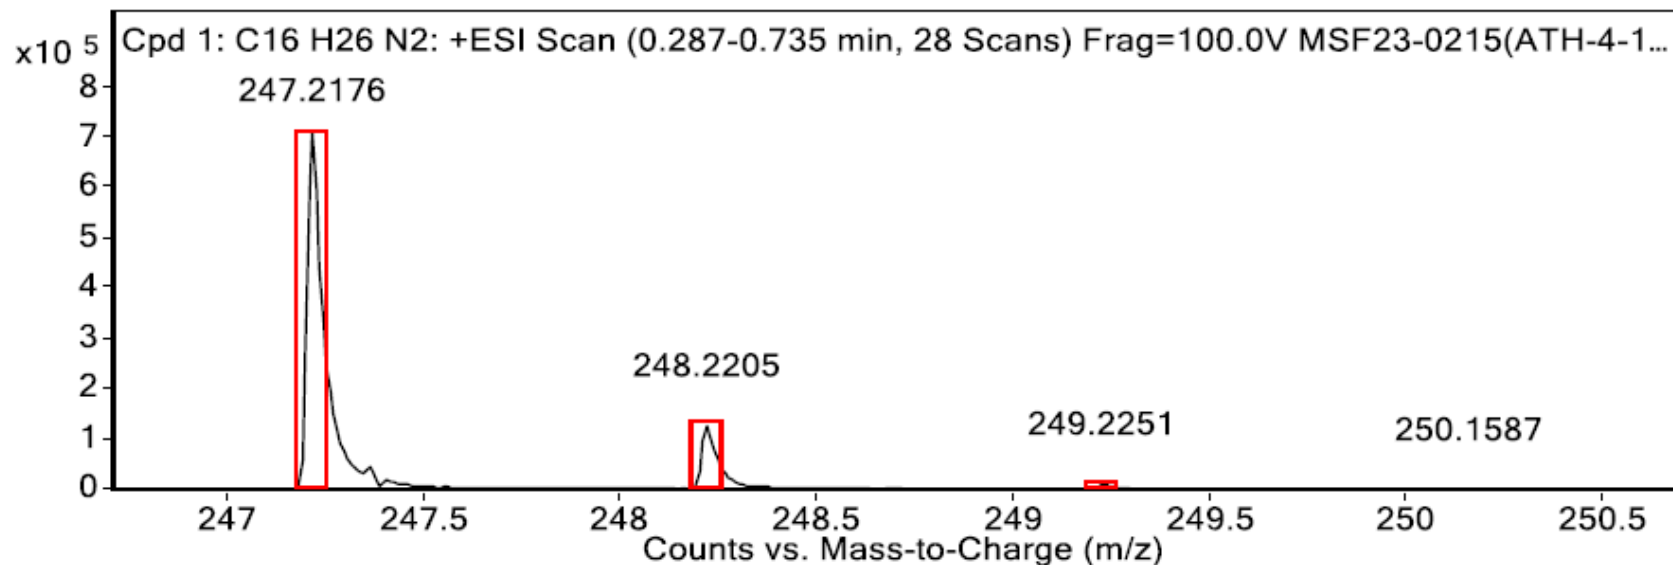

MS Spectrum Peak List

| Obs. m/z | Calc. m/z | Charge | Abundance | Formula                                        | Ion Species        | Tgt Mass Error (ppm) |
|----------|-----------|--------|-----------|------------------------------------------------|--------------------|----------------------|
| 247.2176 | 247.2169  | 1      | 713338    | C <sub>16</sub> H <sub>26</sub> N <sub>2</sub> | (M+H) <sup>+</sup> | -2.85                |
| 248.2205 | 248.2200  | 1      | 129202    | C <sub>16</sub> H <sub>26</sub> N <sub>2</sub> | (M+H) <sup>+</sup> | -1.79                |
| 249.2251 | 249.2232  | 1      | 13058     | C <sub>16</sub> H <sub>26</sub> N <sub>2</sub> | (M+H) <sup>+</sup> | -7.69                |
| 250.1587 | 250.2263  | 1      | 1486      | C <sub>16</sub> H <sub>26</sub> N <sub>2</sub> | (M+H) <sup>+</sup> | 270.12               |

--- End Of Report ---

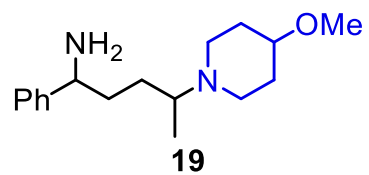

HR-MS (ESI-TOF)  $m/z$ :  $[M+H]^+$  calculated for  $C_{17}H_{29}N_2O^+$ , 277.2274; found mass, 277.2277

Simulated

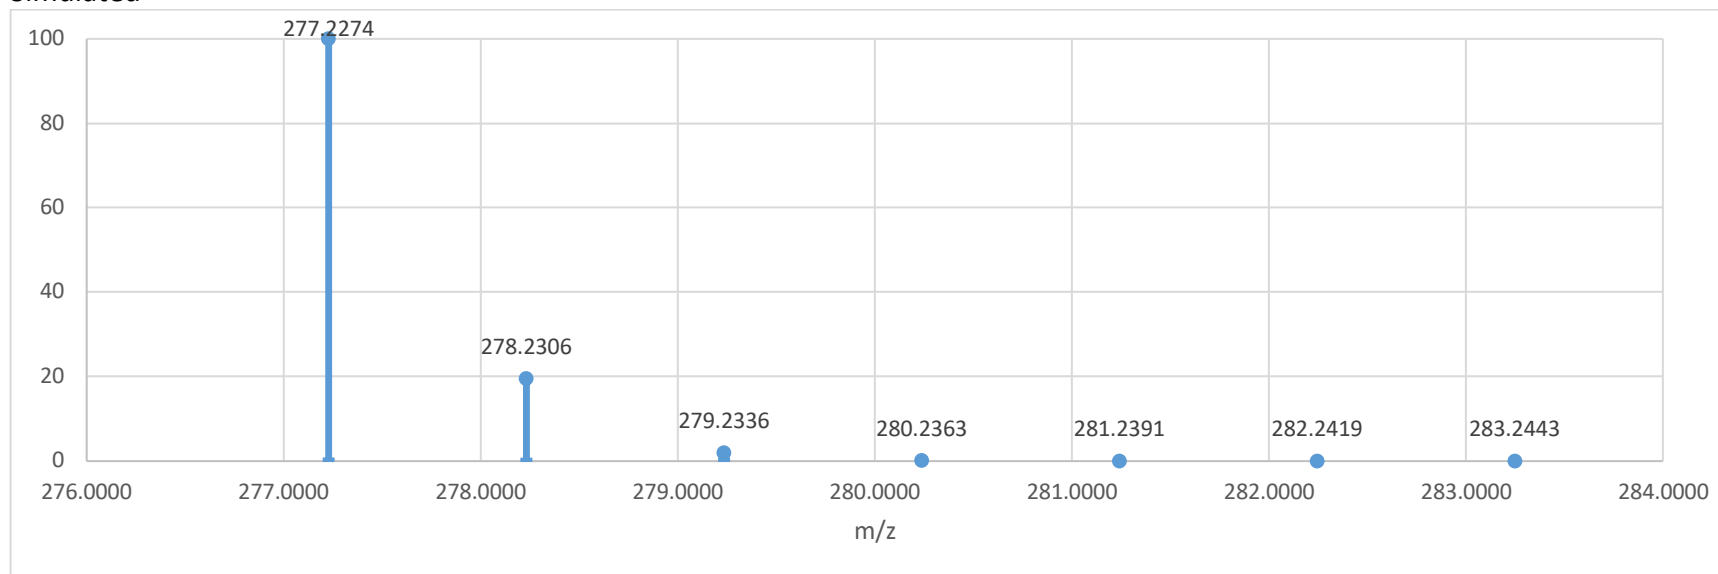



Measured

MS Zoomed Spectrum

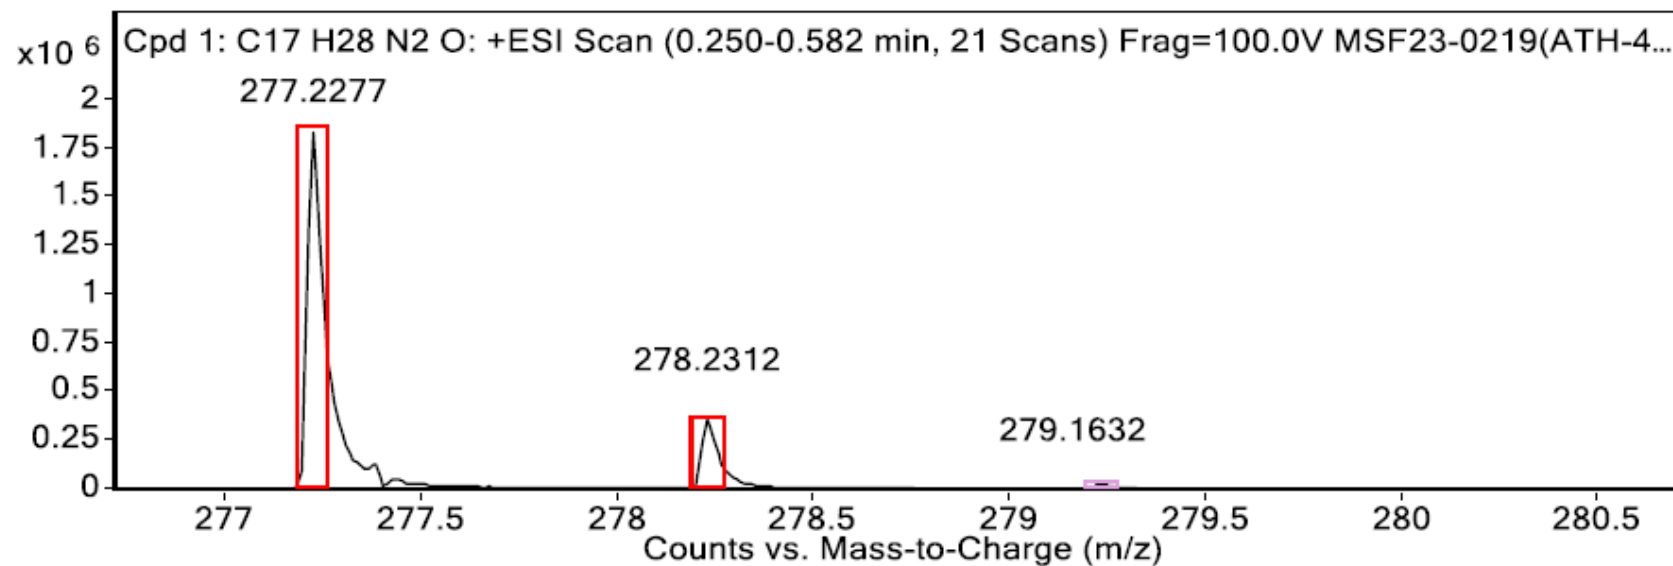

MS Spectrum Peak List

| Obs. m/z | Calc. m/z | Charge | Abundance | Formula                                          | Ion Species        | Tgt Mass Error (ppm) |
|----------|-----------|--------|-----------|--------------------------------------------------|--------------------|----------------------|
| 277.2277 | 277.2274  | 1      | 1854404   | C <sub>17</sub> H <sub>28</sub> N <sub>2</sub> O | (M+H) <sup>+</sup> | -0.95                |
| 278.2312 | 278.2306  | 1      | 362767    | C <sub>17</sub> H <sub>28</sub> N <sub>2</sub> O | (M+H) <sup>+</sup> | -2.01                |
| 279.1632 | 279.2336  | 1      | 1161      | C <sub>17</sub> H <sub>28</sub> N <sub>2</sub> O | (M+H) <sup>+</sup> | 252.03               |

--- End Of Report ---

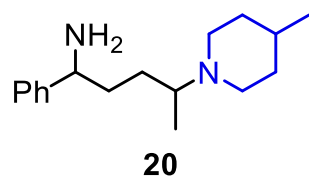

HR-MS (ESI-TOF)  $m/z$ :  $[M+H]^+$  calculated for  $C_{17}H_{29}N_2^+$ , 261.2325; found mass, 261.2326

Simulated

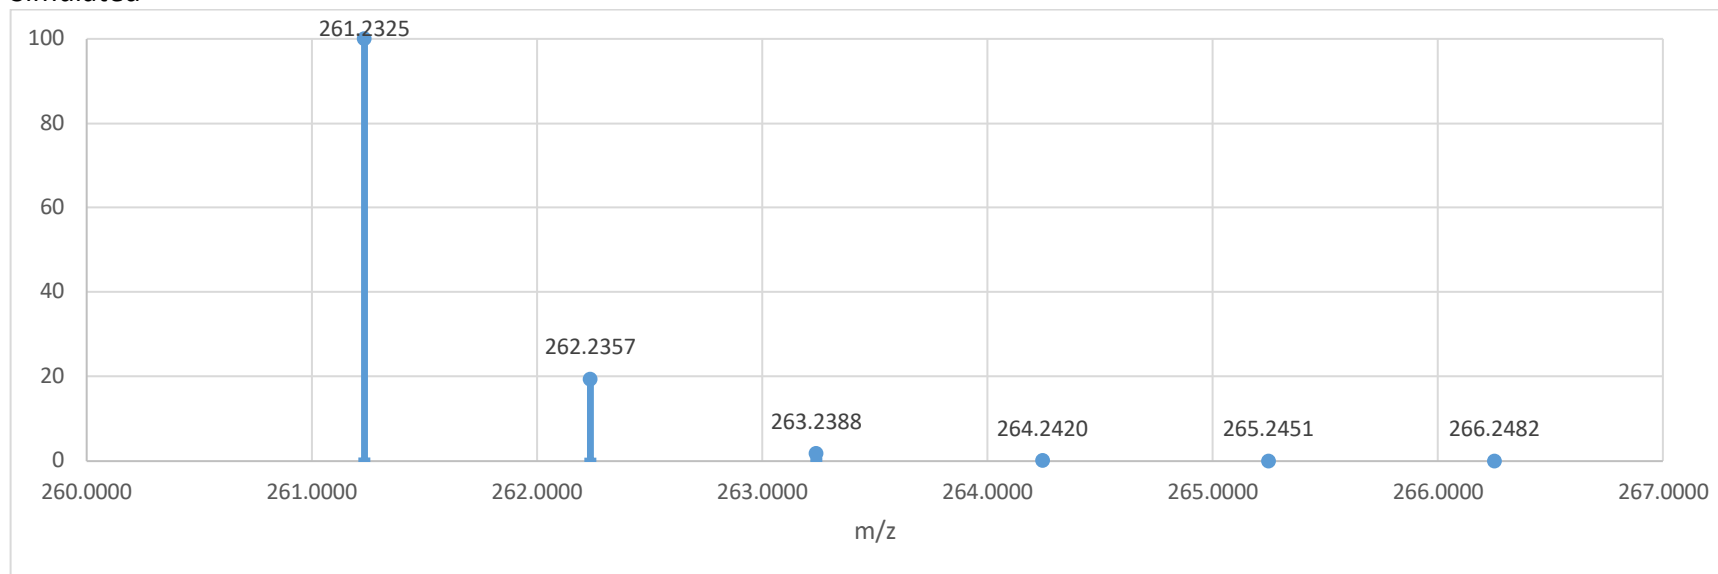

Measured

MS Zoomed Spectrum

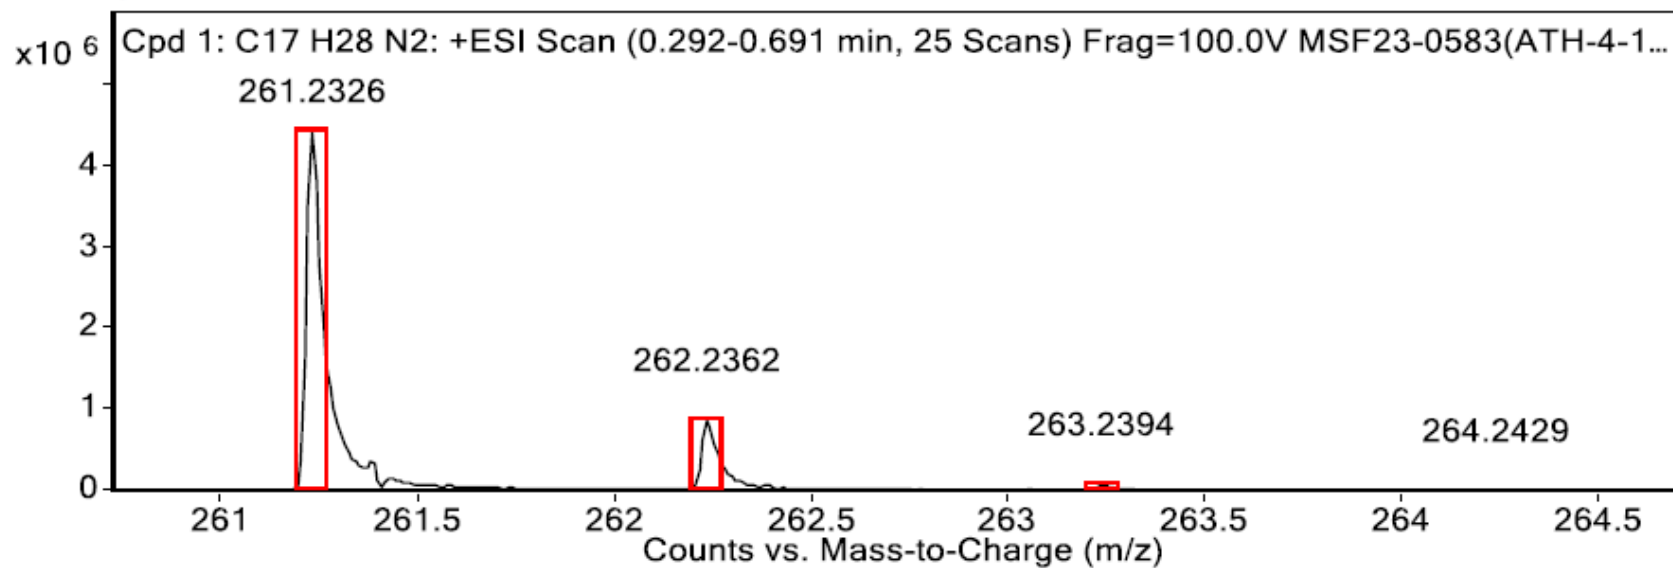

MS Spectrum Peak List

| Obs. m/z | Calc. m/z | Charge | Abundance | Formula  | Ion Species | Tgt Mass Error (ppm) |
|----------|-----------|--------|-----------|----------|-------------|----------------------|
| 261.2326 | 261.2325  | 1      | 4427268   | C17H28N2 | (M+H)+      | -0.35                |
| 262.2362 | 262.2357  | 1      | 877679    | C17H28N2 | (M+H)+      | -2.03                |
| 263.2394 | 263.2388  | 1      | 83968     | C17H28N2 | (M+H)+      | -2.04                |
| 264.2429 | 264.2420  | 1      | 4643      | C17H28N2 | (M+H)+      | -3.32                |

--- End Of Report ---

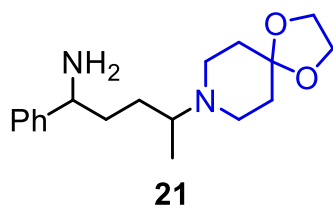

HR-MS (ESI-TOF)  $m/z$ :  $[M+H]^+$  calculated for  $C_{18}H_{29}N_2O_2^+$ , 305.2224; found mass, 305.2230.

Simulated

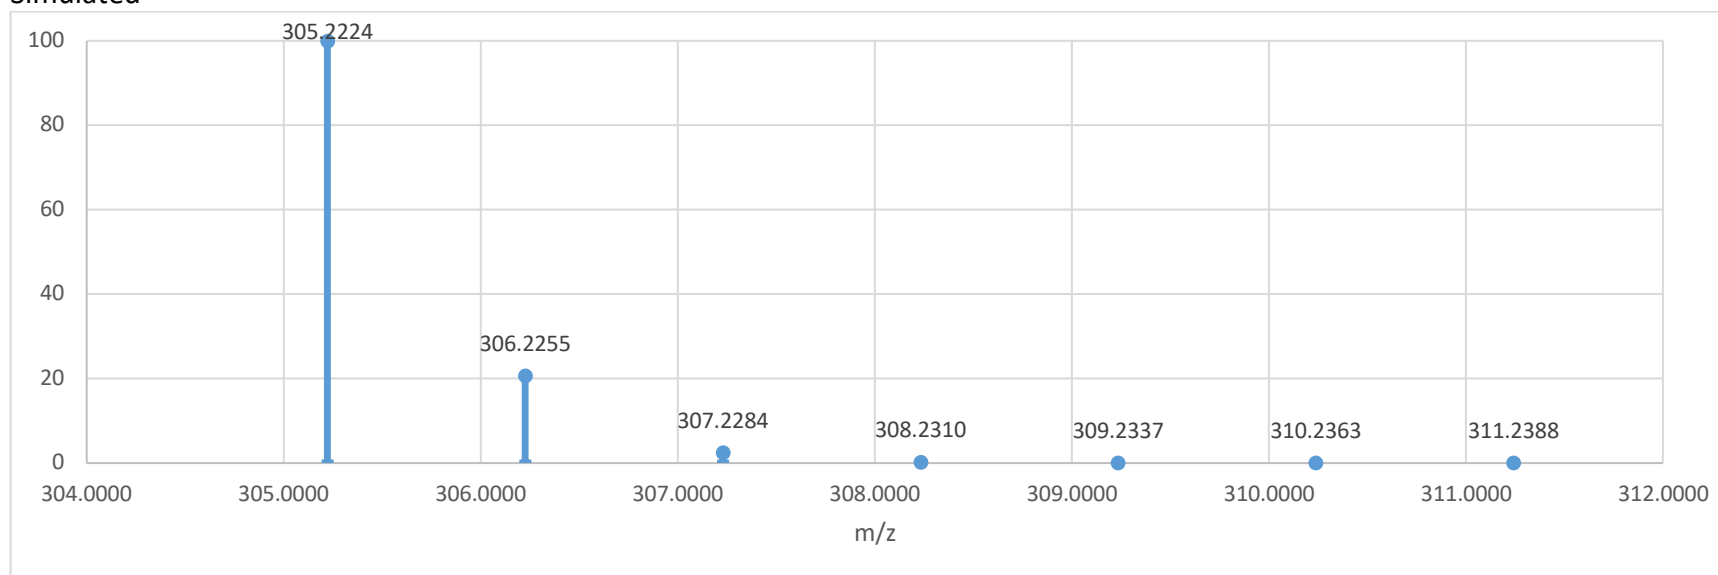

Measured

MS Zoomed Spectrum

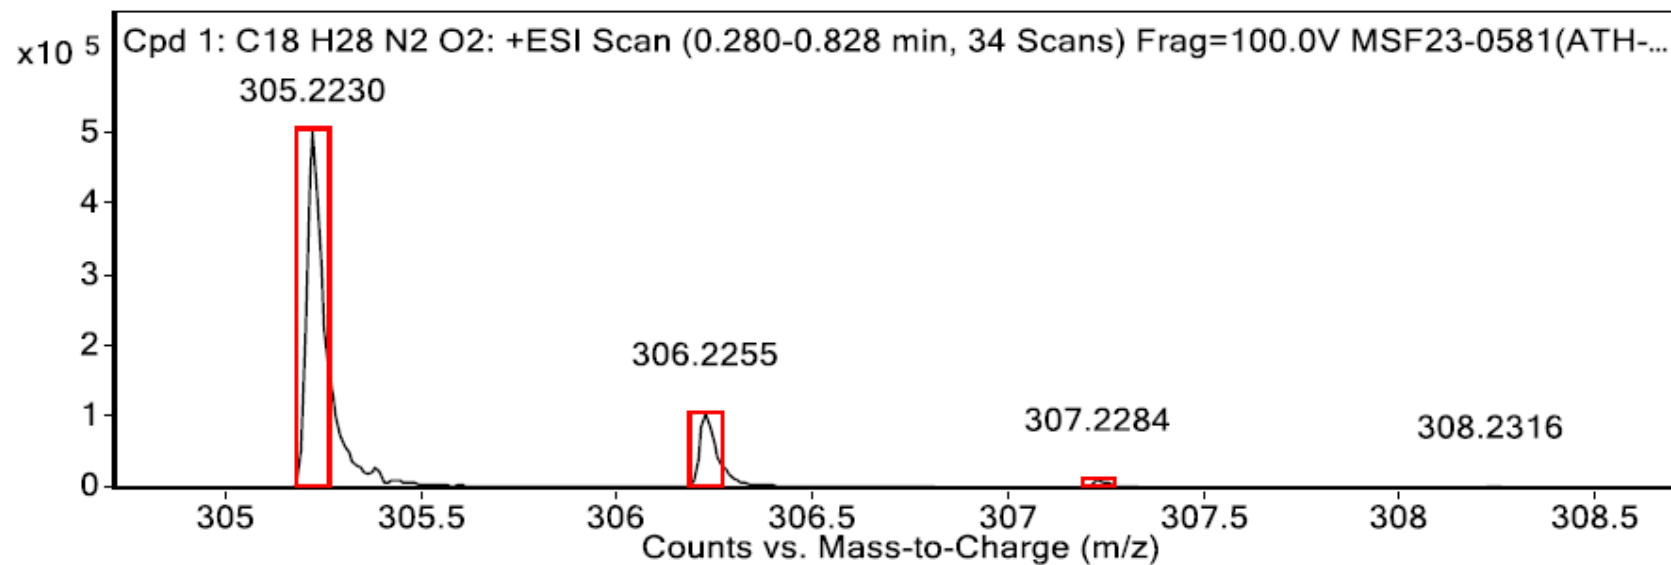

MS Spectrum Peak List

| Obs. m/z | Calc. m/z | Charge | Abundance | Formula    | Ion Species | Tgt Mass Error (ppm) |
|----------|-----------|--------|-----------|------------|-------------|----------------------|
| 144.1020 |           |        | 1712258   |            |             |                      |
| 305.2230 | 305.2224  | 1      | 504905    | C18H28N2O2 | (M+H)+      | -2.02                |
| 306.2255 | 306.2255  | 1      | 105557    | C18H28N2O2 | (M+H)+      | 0.04                 |
| 307.2284 | 307.2284  | 1      | 12823     | C18H28N2O2 | (M+H)+      | -0.14                |
| 308.2316 | 308.2310  | 1      | 2389      | C18H28N2O2 | (M+H)+      | -1.75                |

--- End Of Report ---

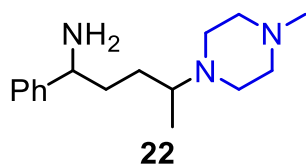

HR-MS (ESI-TOF)  $m/z$ :  $[M+H]^+$  calculated for  $C_{16}H_{28}N_3^+$ , 262.2278; found mass, 262.2287.

Simulated

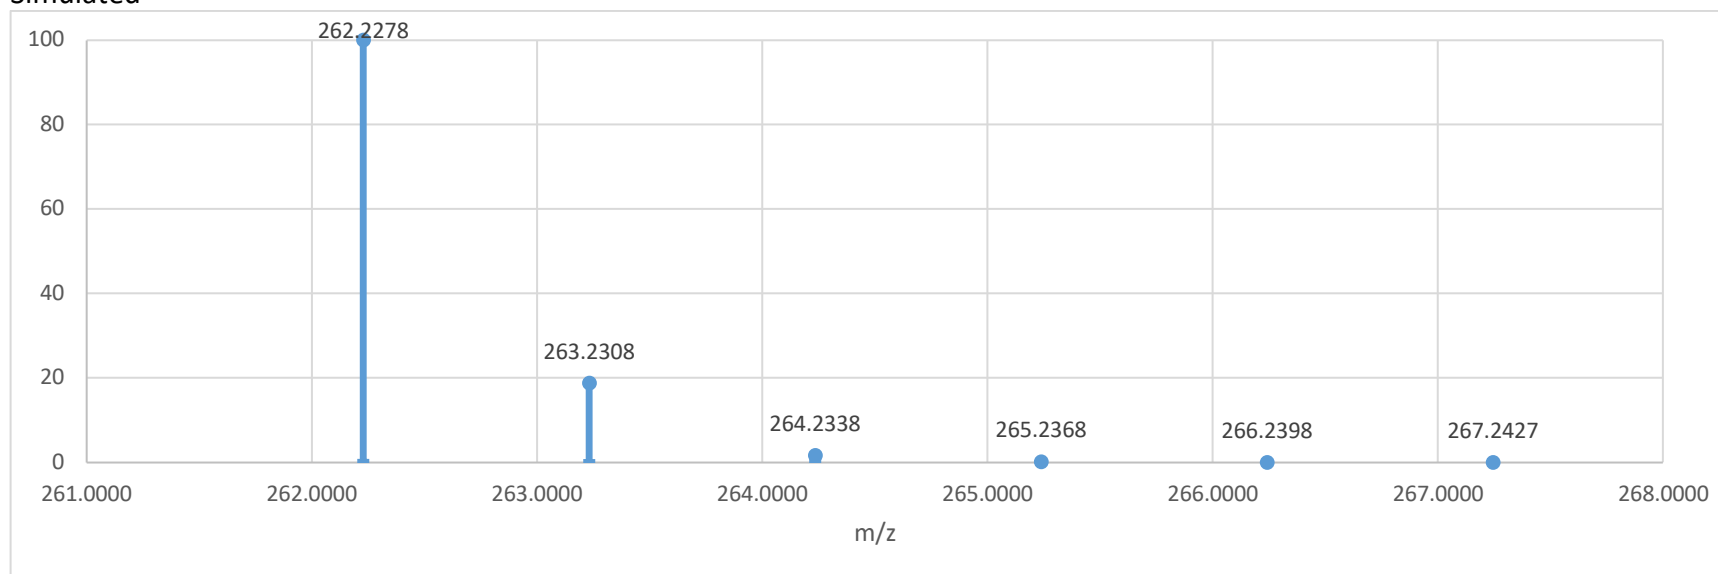

Measured

MS Zoomed Spectrum

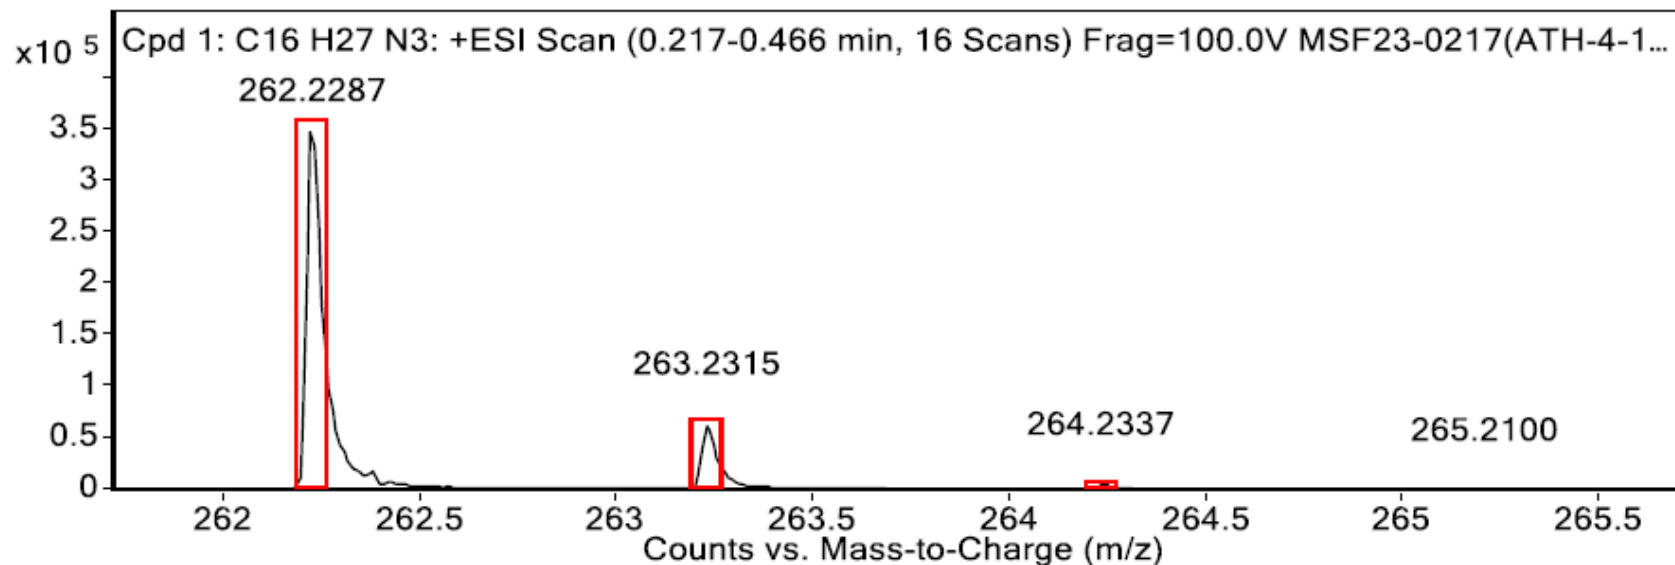

MS Spectrum Peak List

| Obs. m/z | Calc. m/z | Charge | Abundance | Formula  | Ion Species | Tgt Mass Error (ppm) |
|----------|-----------|--------|-----------|----------|-------------|----------------------|
| 262.2287 | 262.2278  | 1      | 359567    | C16H27N3 | (M+H)+      | -3.69                |
| 263.2315 | 263.2308  | 1      | 64990     | C16H27N3 | (M+H)+      | -2.55                |
| 264.2337 | 264.2338  | 1      | 6170      | C16H27N3 | (M+H)+      | 0.32                 |
| 265.2100 | 265.2368  | 1      | 459       | C16H27N3 | (M+H)+      | 101.12               |

--- End Of Report ---

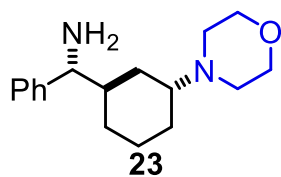

29% yield  
>20:1 dr

HR-MS (ESI-TOF)  $m/z$ :  $[M+H]^+$  calculated for  $C_{17}H_{27}N_2O^+$ , 275.2118; found mass = 275.2117

Simulated

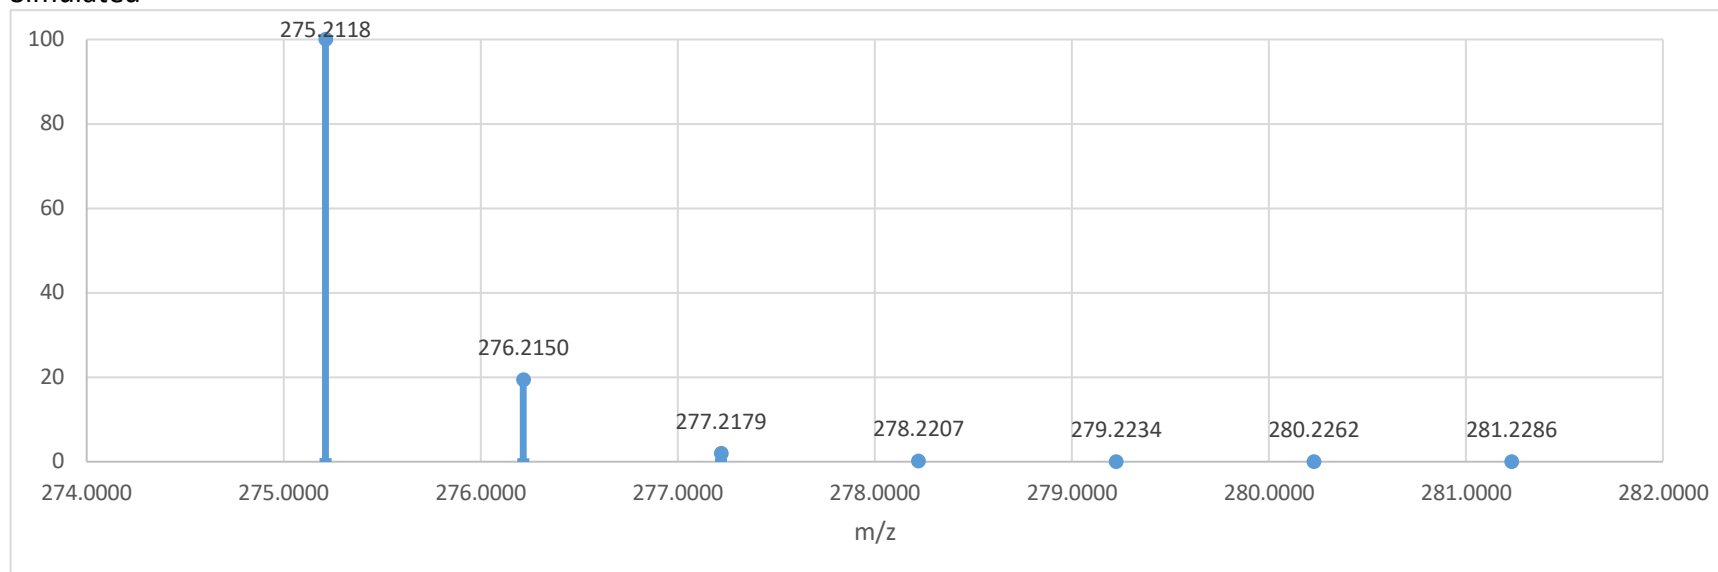



Measured

Monoisotopic Mass, Even Electron Ions

245 formula(e) evaluated with 1 results within limits (up to 50 closest results for each mass)

Elements Used:

C: 0-200 H: 0-200 N: 0-5 O: 0-5 Na: 0-1

cyen-morph

Qtof\_68328 57 (2.183) AM (Cen,5, 80.00, Ar,14000.0,558.36,0.70,LS 5); Sm (SG, 2x5.00); Cm (55:57)

1: TOF MS ES+  
2.99e+003

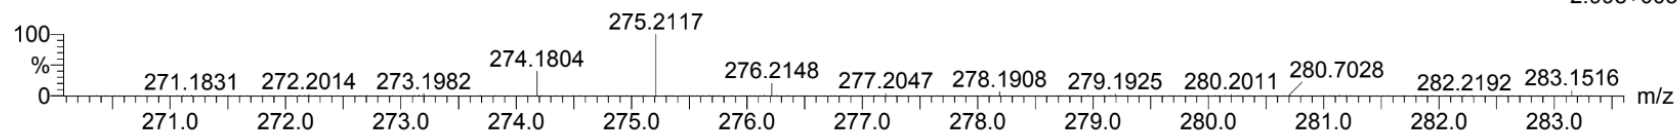

Minimum: -1.5  
Maximum: 100.0

| Mass     | Calc. Mass | mDa  | PPM  | DBE | i-FIT | Formula      |
|----------|------------|------|------|-----|-------|--------------|
| 275.2117 | 275.2123   | -0.6 | -2.2 | 5.5 | 9.7   | C17 H27 N2 O |

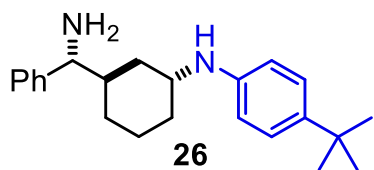

HR-MS (ESI-TOF)  $m/z$ :  $[M+Na]^+$  calculated for  $C_{23}H_{32}N_2Na^+$ , 359.2458; found mass, 359.2461

Simulated

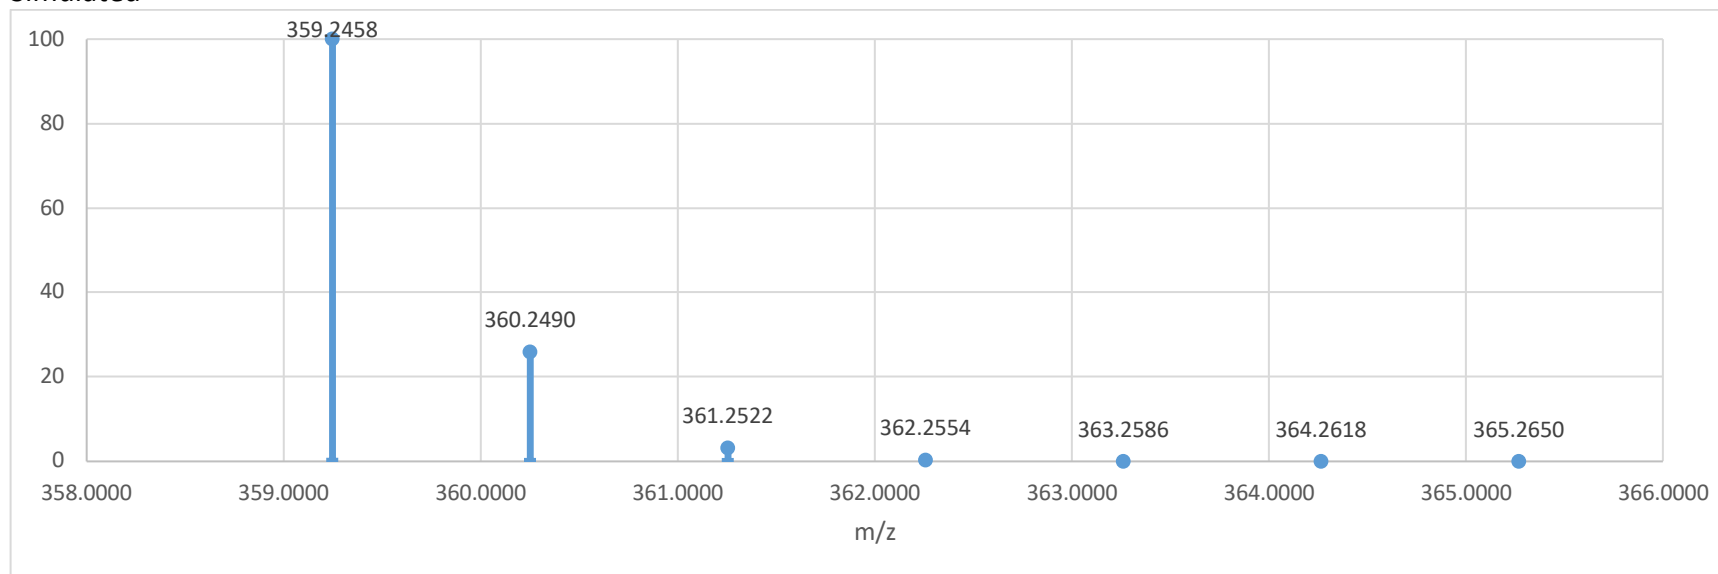

Measured

MS Zoomed Spectrum

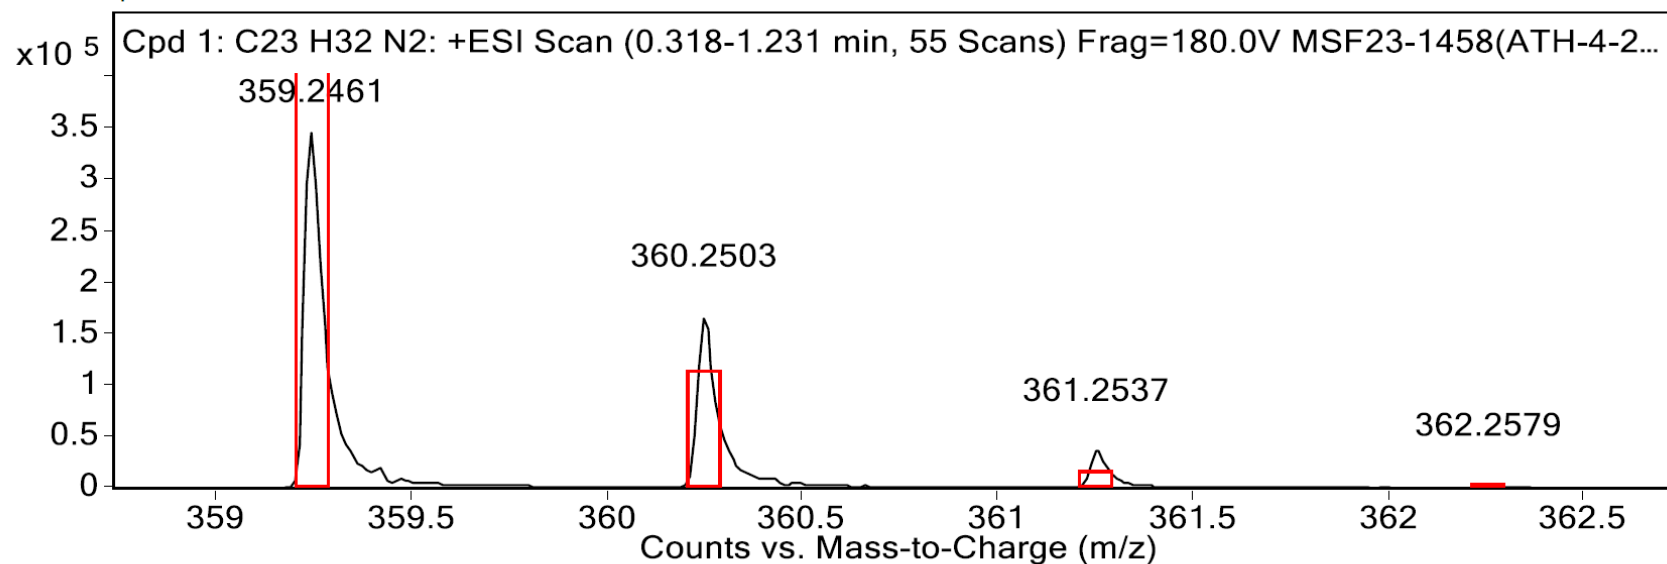

MS Spectrum Peak List

| Obs. m/z | Calc. m/z | Charge | Abundance | Formula  | Ion Species | Tgt Mass Error (ppm) |
|----------|-----------|--------|-----------|----------|-------------|----------------------|
| 320.2368 |           |        | 2726235   |          |             |                      |
| 359.2461 | 359.2458  | 1      | 346872    | C23H32N2 | (M+Na)+     | -0.85                |
| 360.2503 | 360.2490  | 1      | 169485    | C23H32N2 | (M+Na)+     | -3.53                |
| 361.2537 | 361.2522  | 1      | 38309     | C23H32N2 | (M+Na)+     | -4.11                |
| 362.2579 | 362.2554  | 1      | 4415      | C23H32N2 | (M+Na)+     | -7.01                |

--- End Of Report ---

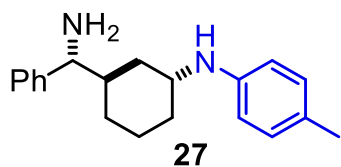

HR-MS (ESI-TOF)  $m/z$ :  $[M+Na]^+$  calculated for  $C_{20}H_{26}N_2Na^+$ , 317.1988; found mass, 317.1984

Simulated

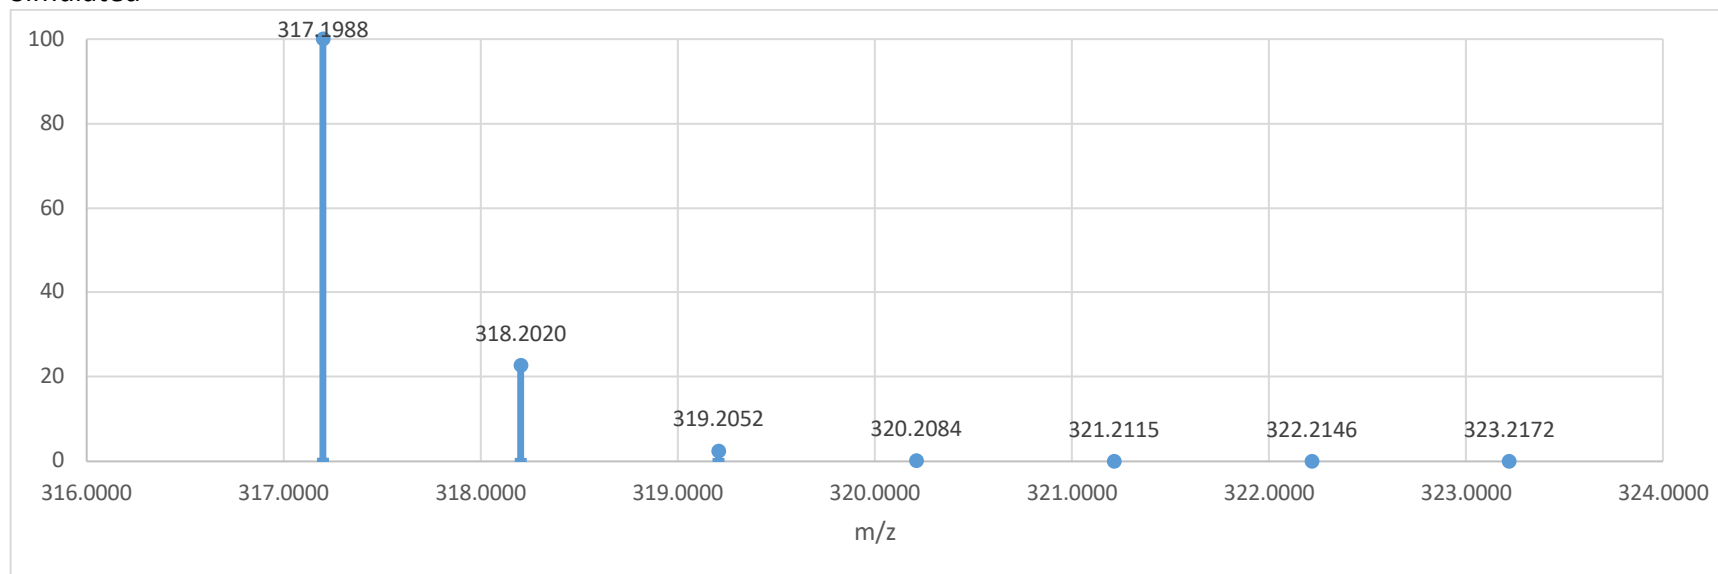

Measured

MS Zoomed Spectrum

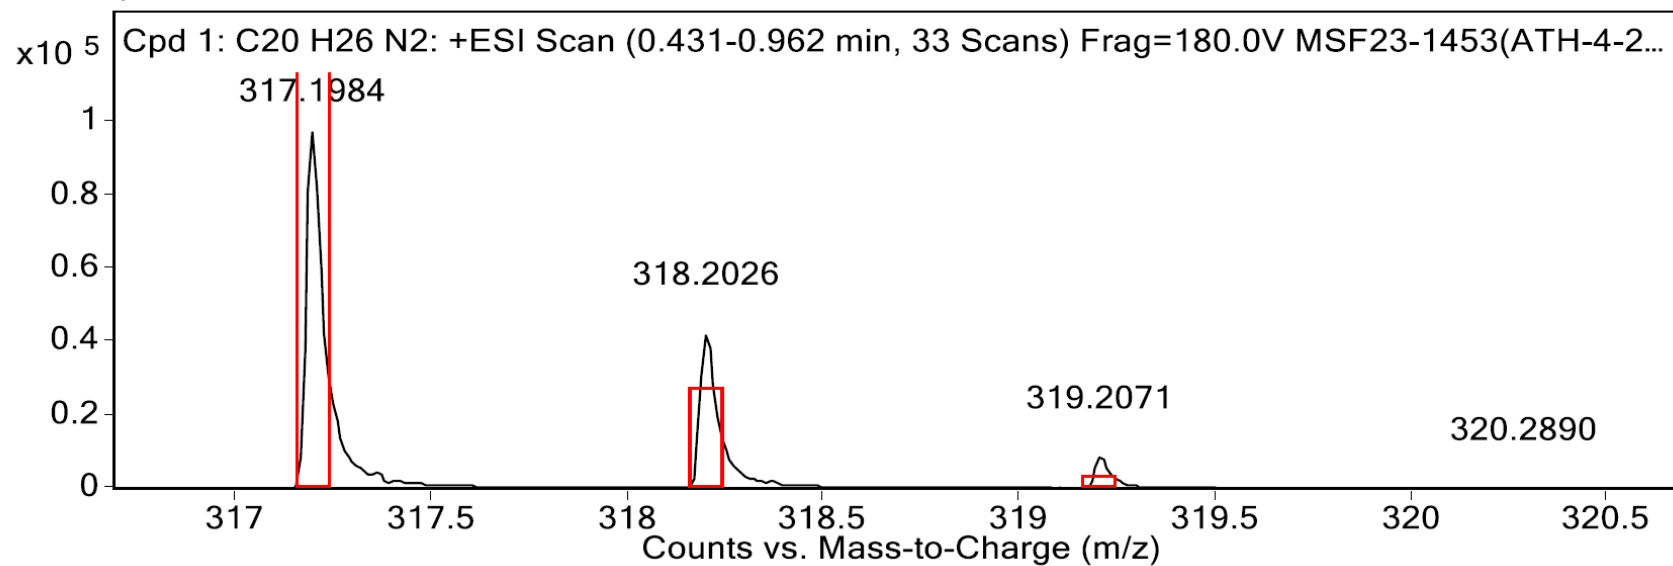

MS Spectrum Peak List

| Obs. m/z | Calc. m/z | Charge | Abundance | Formula                                        | Ion Species         | Tgt Mass Error (ppm) |
|----------|-----------|--------|-----------|------------------------------------------------|---------------------|----------------------|
| 278.1898 |           |        | 1259193   |                                                |                     |                      |
| 317.1984 | 317.1988  | 1      | 97266     | C <sub>20</sub> H <sub>26</sub> N <sub>2</sub> | (M+Na) <sup>+</sup> | 1.38                 |
| 318.2026 | 318.2020  | 1      | 42477     | C <sub>20</sub> H <sub>26</sub> N <sub>2</sub> | (M+Na) <sup>+</sup> | -1.88                |
| 319.2071 | 319.2052  | 1      | 8702      | C <sub>20</sub> H <sub>26</sub> N <sub>2</sub> | (M+Na) <sup>+</sup> | -6.1                 |
| 320.2890 | 320.2084  | 1      | 69        | C <sub>20</sub> H <sub>26</sub> N <sub>2</sub> | (M+Na) <sup>+</sup> | -251.79              |

--- End Of Report ---

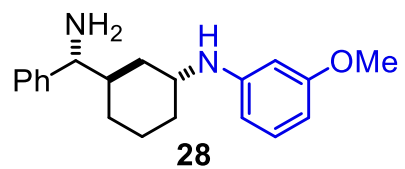

HR-MS (ESI-TOF)  $m/z$ :  $[M+Na]^+$  calculated for  $C_{20}H_{26}N_2ONa^+$ , 333.1937; found mass, 333.1941

Simulated

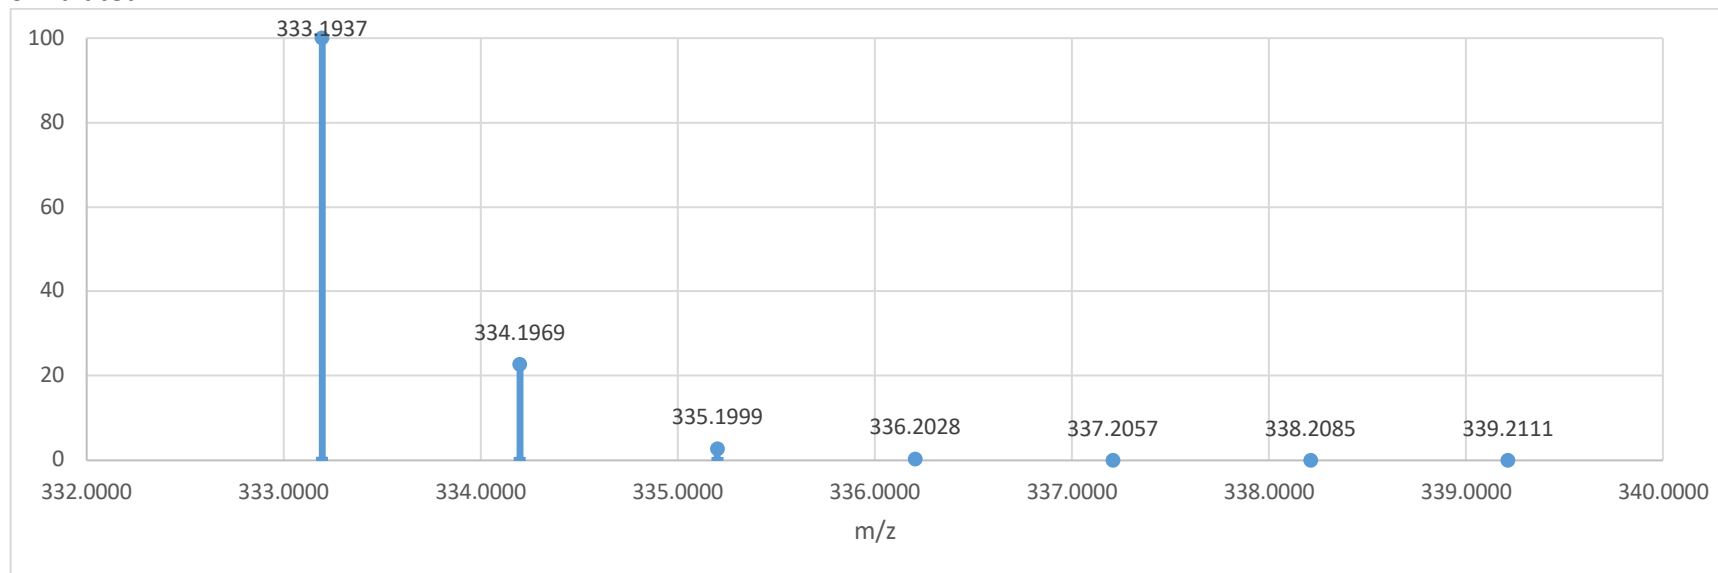

Measured

MS Zoomed Spectrum

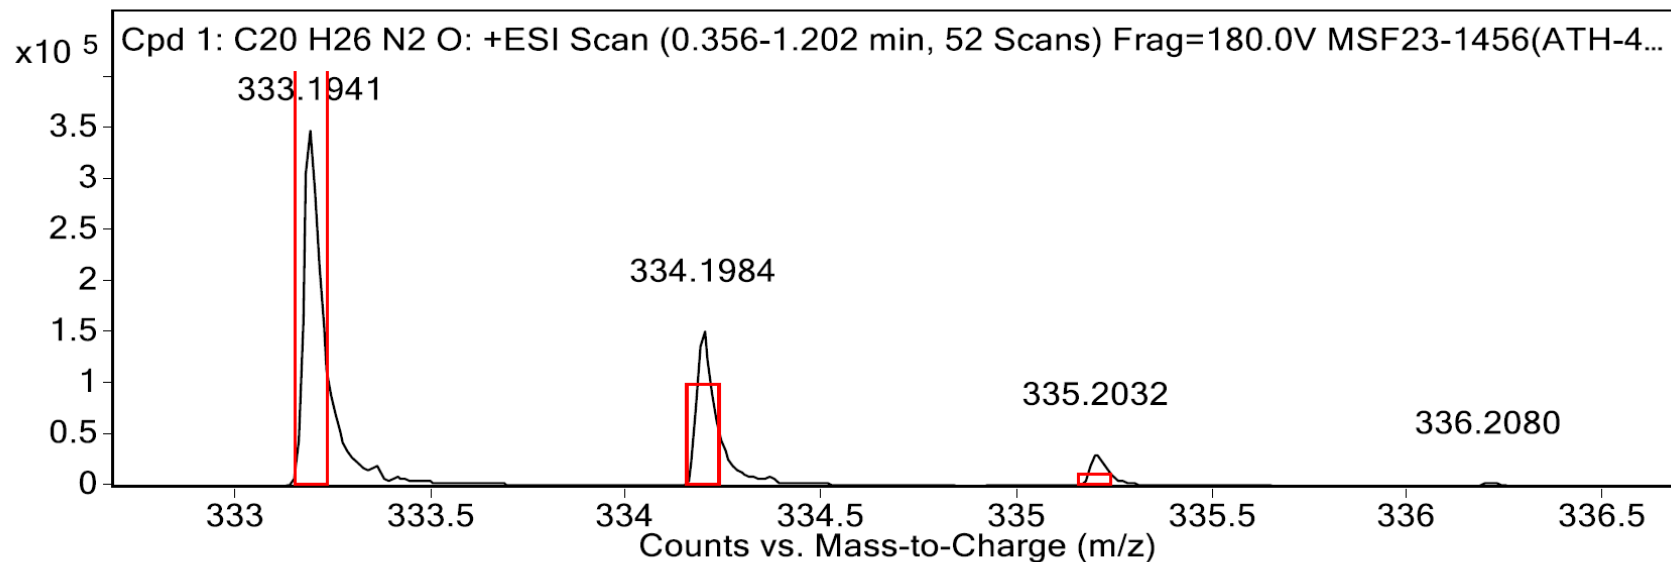

MS Spectrum Peak List

| Obs. m/z | Calc. m/z | Charge | Abundance | Formula   | Ion Species | Tgt Mass Error (ppm) |
|----------|-----------|--------|-----------|-----------|-------------|----------------------|
| 294.1847 |           |        | 3007993   |           |             |                      |
| 333.1941 | 333.1937  | 1      | 347719    | C20H26N2O | (M+Na)+     | -1.25                |
| 334.1984 | 334.1969  | 1      | 152979    | C20H26N2O | (M+Na)+     | -4.33                |
| 335.2032 | 335.1999  | 1      | 32556     | C20H26N2O | (M+Na)+     | -9.68                |
| 336.2080 | 336.2028  | 1      | 4433      | C20H26N2O | (M+Na)+     | -15.48               |

--- End Of Report ---

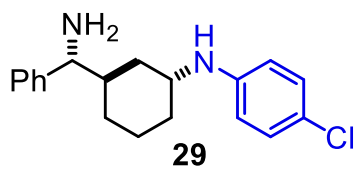

HR-MS (ESI-TOF)  $m/z$ :  $[M+H]^+$  calculated for  $C_{19}H_{24}ClN_2^+$ , 315.1623; found mass, 315.1617

Simulated

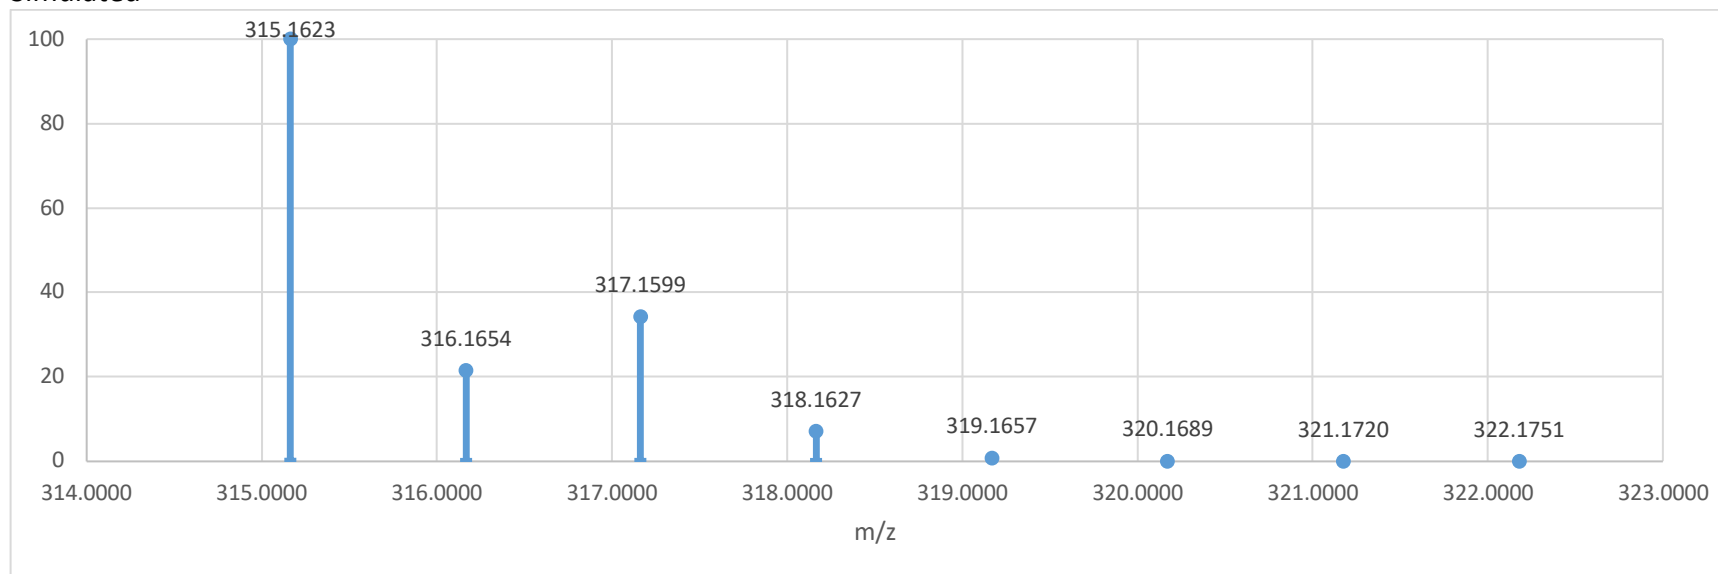



Measured

MS Zoomed Spectrum

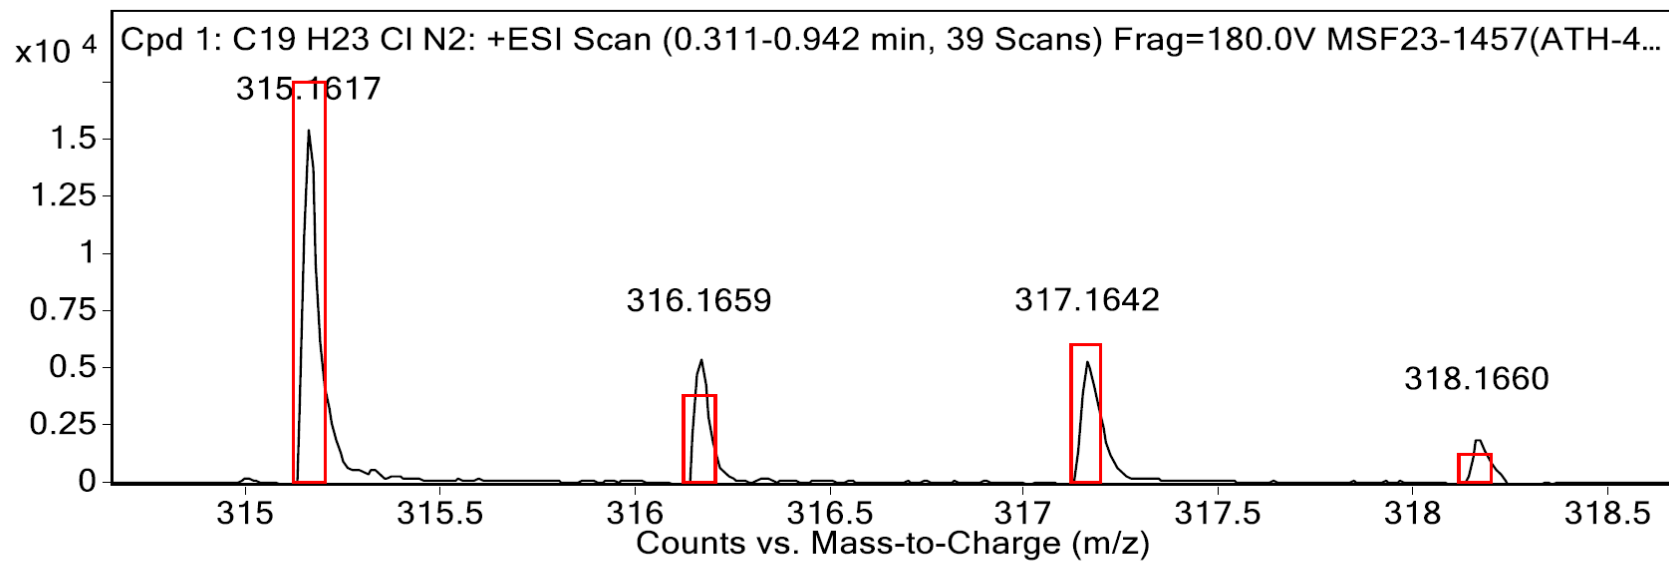

MS Spectrum Peak List

| Obs. m/z | Calc. m/z | Charge | Abundance | Formula    | Ion Species | Tgt Mass Error (ppm) |
|----------|-----------|--------|-----------|------------|-------------|----------------------|
| 171.1159 |           |        | 1251253   |            |             |                      |
| 315.1617 | 315.1623  | 1      | 15687     | C19H23ClN2 | (M+H)+      | 1.63                 |
| 316.1659 | 316.1654  | 1      | 5465      | C19H23ClN2 | (M+H)+      | -1.36                |
| 317.1642 | 317.1599  | 1      | 5498      | C19H23ClN2 | (M+H)+      | -13.56               |
| 318.1660 | 318.1627  | 1      | 2041      | C19H23ClN2 | (M+H)+      | -10.52               |

--- End Of Report ---

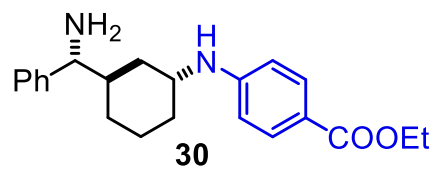

HR-MS (ESI-TOF)  $m/z$ :  $[M+H]^+$  calculated for  $C_{22}H_{29}N_2O_2^+$ , 353.2224; found mass, 353.2230

Simulated

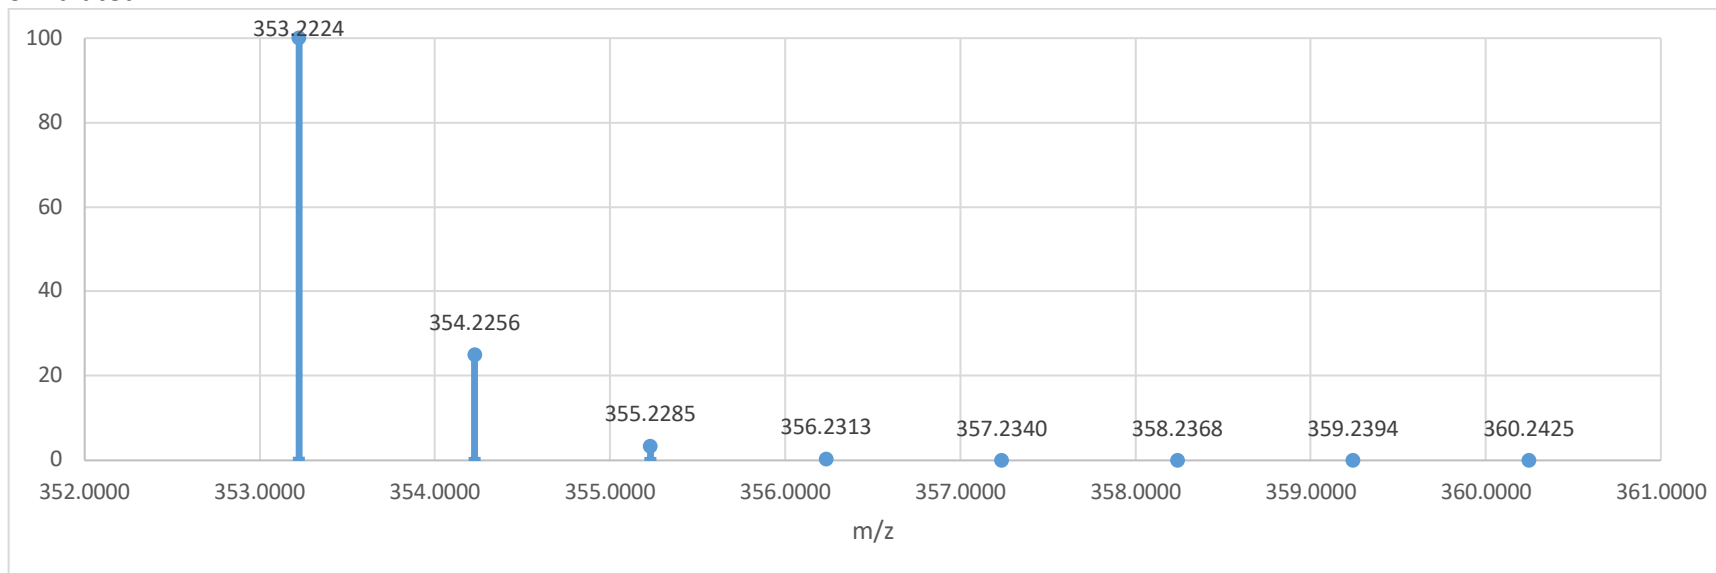

Measured

MS Zoomed Spectrum

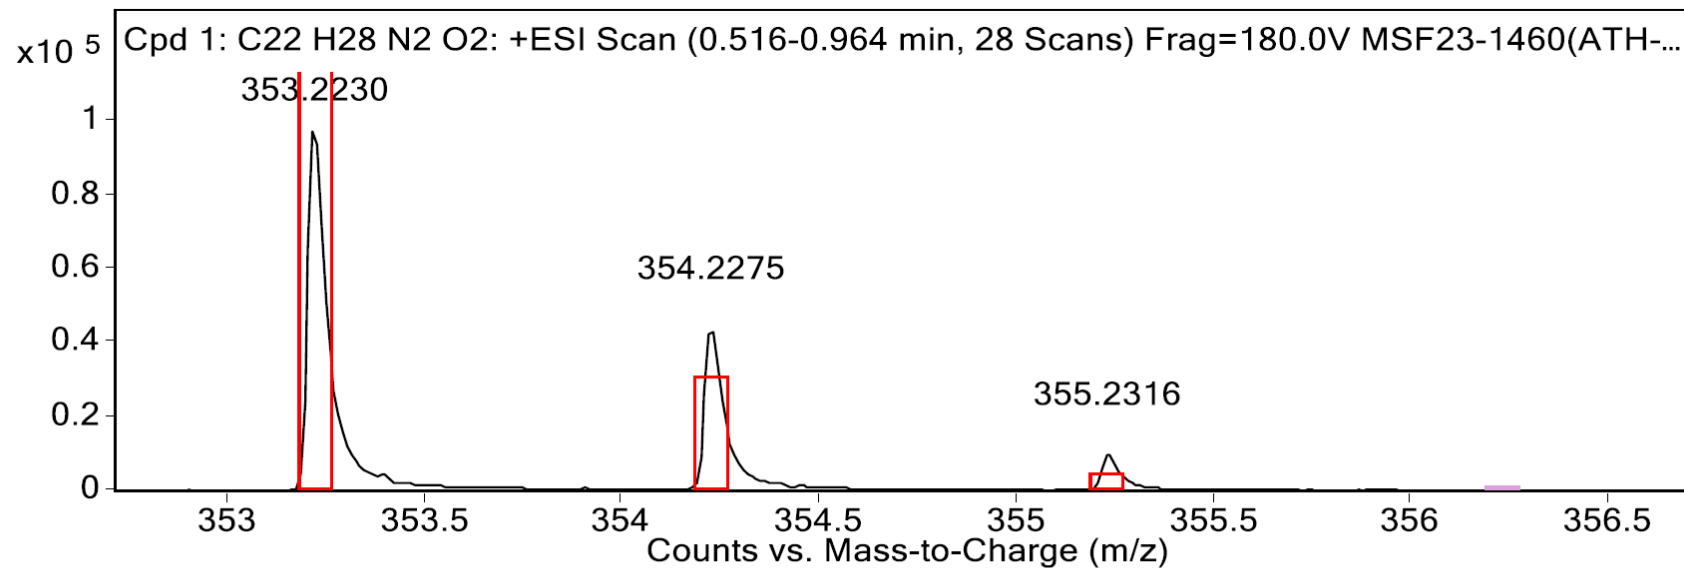

MS Spectrum Peak List

| Obs. m/z | Calc. m/z | Charge | Abundance | Formula                                                       | Ion Species        | Tgt Mass Error (ppm) |
|----------|-----------|--------|-----------|---------------------------------------------------------------|--------------------|----------------------|
| 336.1963 |           |        | 1492790   |                                                               |                    |                      |
| 353.2230 | 353.2224  | 1      | 100199    | C <sub>22</sub> H <sub>28</sub> N <sub>2</sub> O <sub>2</sub> | (M+H) <sup>+</sup> | -1.83                |
| 354.2275 | 354.2256  | 1      | 44184     | C <sub>22</sub> H <sub>28</sub> N <sub>2</sub> O <sub>2</sub> | (M+H) <sup>+</sup> | -5.5                 |
| 355.2316 | 355.2285  | 1      | 10049     | C <sub>22</sub> H <sub>28</sub> N <sub>2</sub> O <sub>2</sub> | (M+H) <sup>+</sup> | -8.72                |

--- End Of Report ---

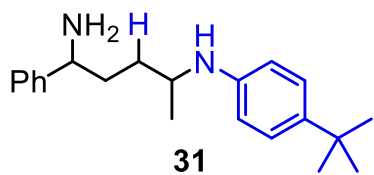

HR-MS (ESI-TOF)  $m/z$ :  $[M+H]^+$  calculated for  $C_{21}H_{31}N_2^+$ , 311.2487; found mass, 311.2475

### Simulated

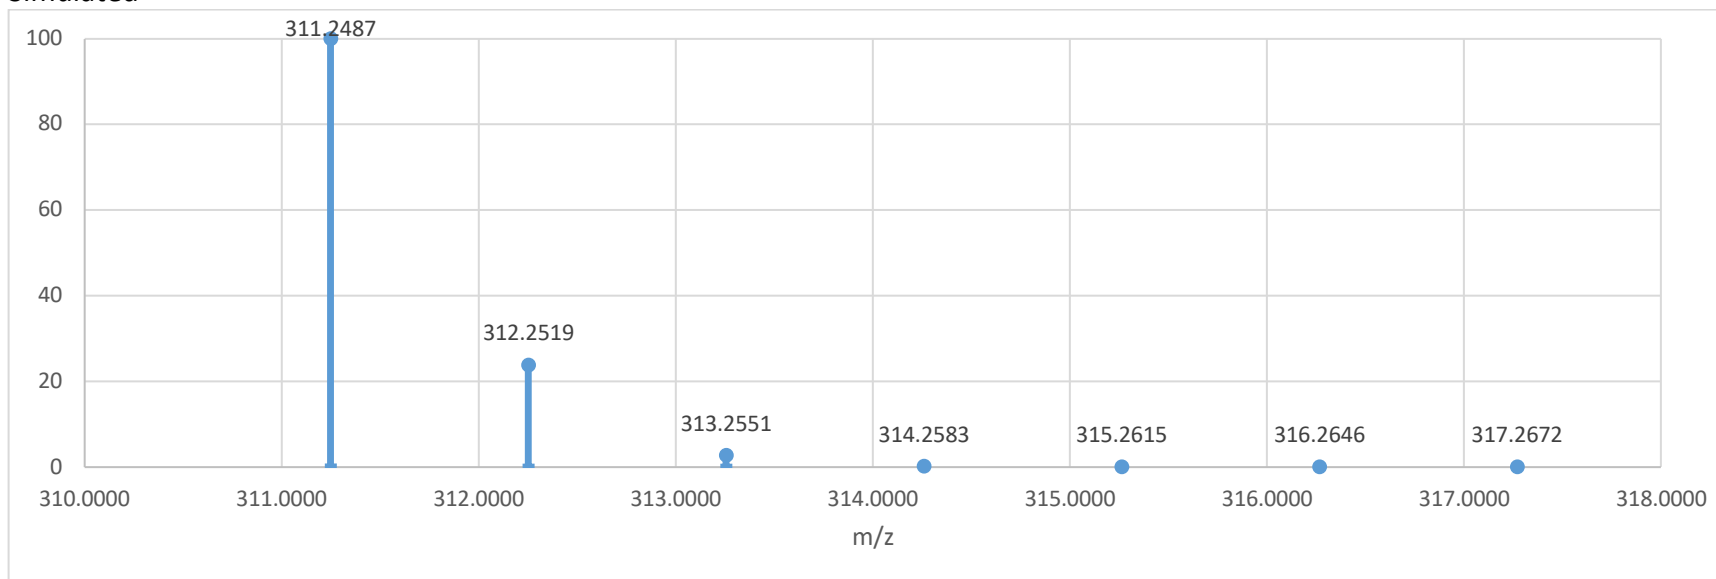

Measured

MS Zoomed Spectrum

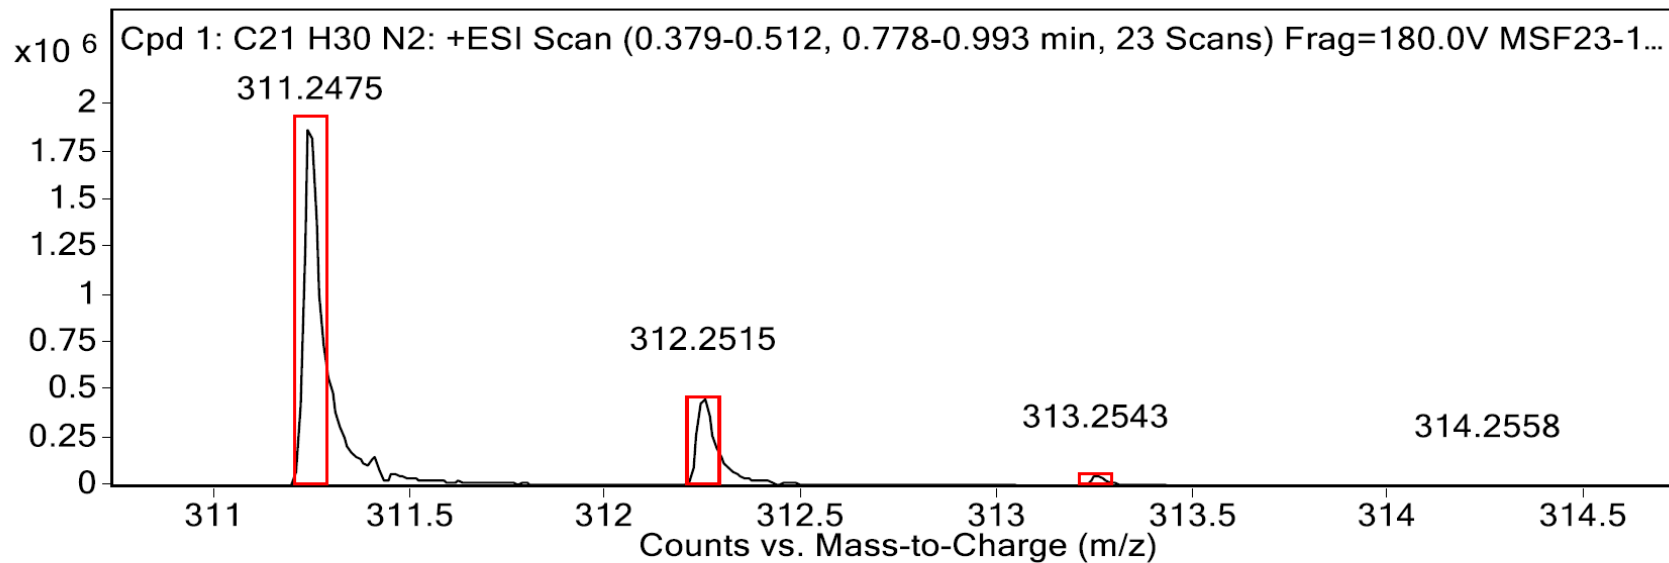

MS Spectrum Peak List

| Obs. m/z | Calc. m/z | Charge | Abundance | Formula  | Ion Species | Tgt Mass Error (ppm) |
|----------|-----------|--------|-----------|----------|-------------|----------------------|
| 294.2209 |           |        | 2958008   |          |             |                      |
| 311.2475 | 311.2482  | 1      | 1934663   | C21H30N2 | (M+H)+      | 2.13                 |
| 312.2515 | 312.2514  | 1      | 462614    | C21H30N2 | (M+H)+      | -0.24                |
| 313.2543 | 313.2546  | 1      | 54890     | C21H30N2 | (M+H)+      | 1.01                 |
| 314.2558 | 314.2578  | 1      | 3433      | C21H30N2 | (M+H)+      | 6.25                 |

--- End Of Report ---

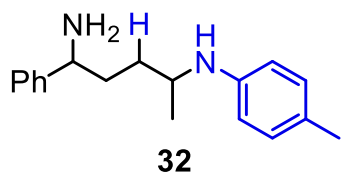

HR-MS (ESI-TOF)  $m/z$ :  $[M+H]^+$  calculated for  $C_{18}H_{25}N_2^+$ , 269.2018; found mass, 269.2008

Simulated

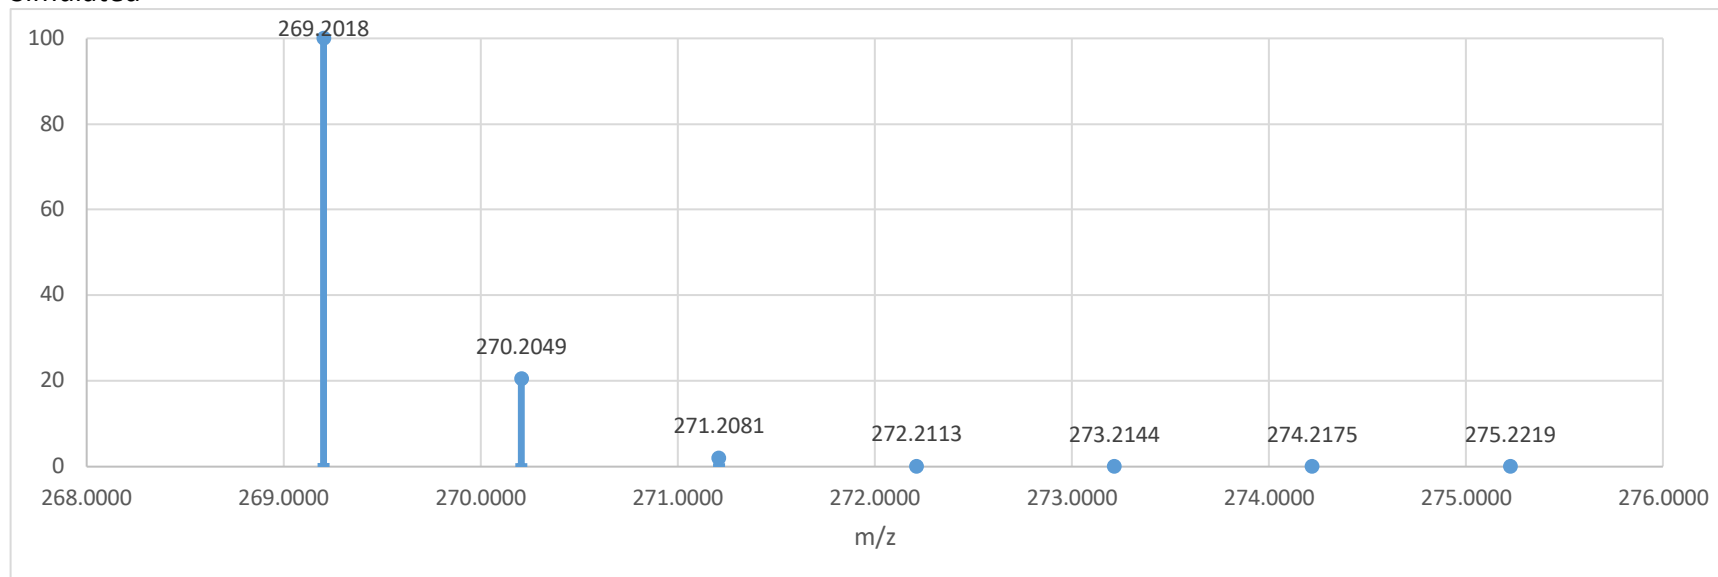

Measured

MS Zoomed Spectrum

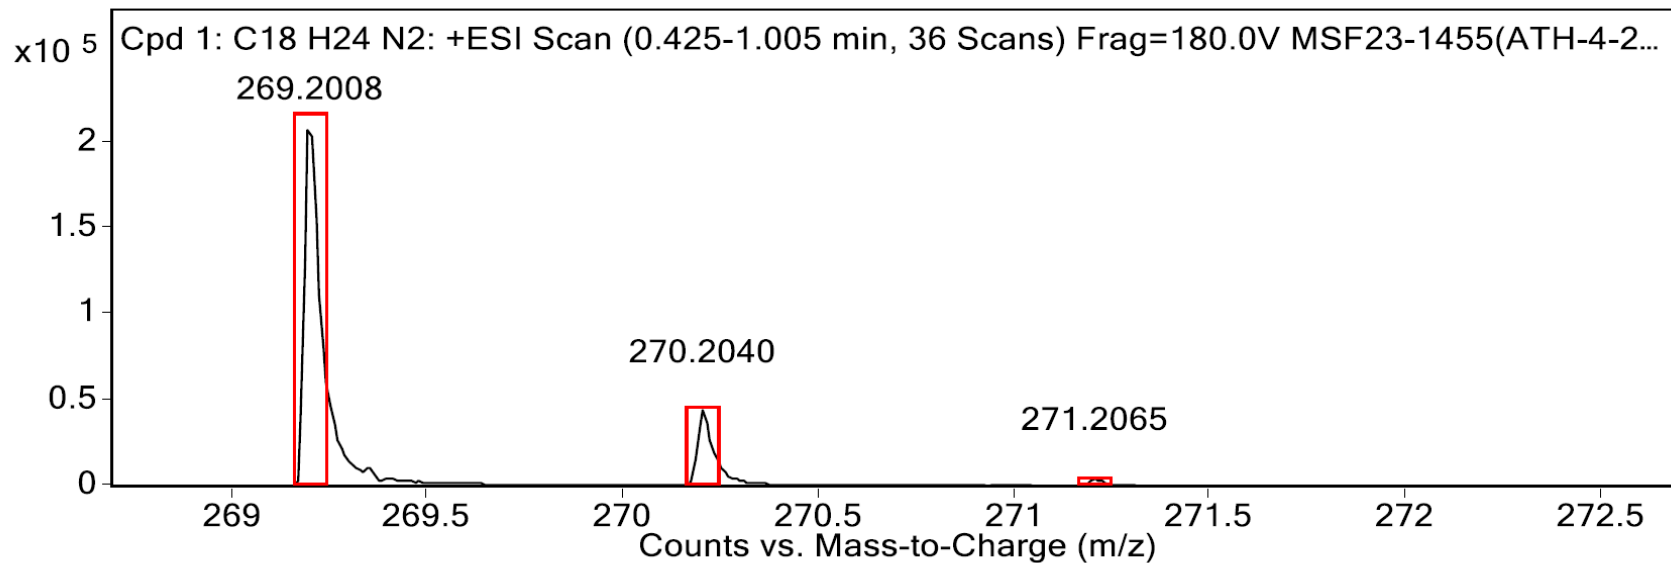

MS Spectrum Peak List

| Obs. m/z | Calc. m/z | Charge | Abundance | Formula  | Ion Species | Tgt Mass Error (ppm) |
|----------|-----------|--------|-----------|----------|-------------|----------------------|
| 252.1738 |           |        | 2727513   |          |             |                      |
| 269.2008 | 269.2012  | 1      | 215531    | C18H24N2 | (M+H)+      | 1.49                 |
| 270.2040 | 270.2044  | 1      | 44052     | C18H24N2 | (M+H)+      | 1.59                 |
| 271.2065 | 271.2076  | 1      | 4694      | C18H24N2 | (M+H)+      | 3.94                 |

--- End Of Report ---

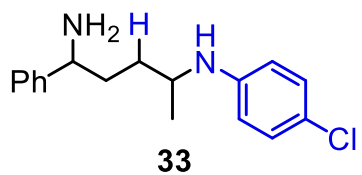

HR-MS (ESI-TOF)  $m/z$ :  $[M+H]^+$  calculated for  $C_{17}H_{22}ClN_2^+$ , 289.1472; found mass, 289.1462

### Simulated

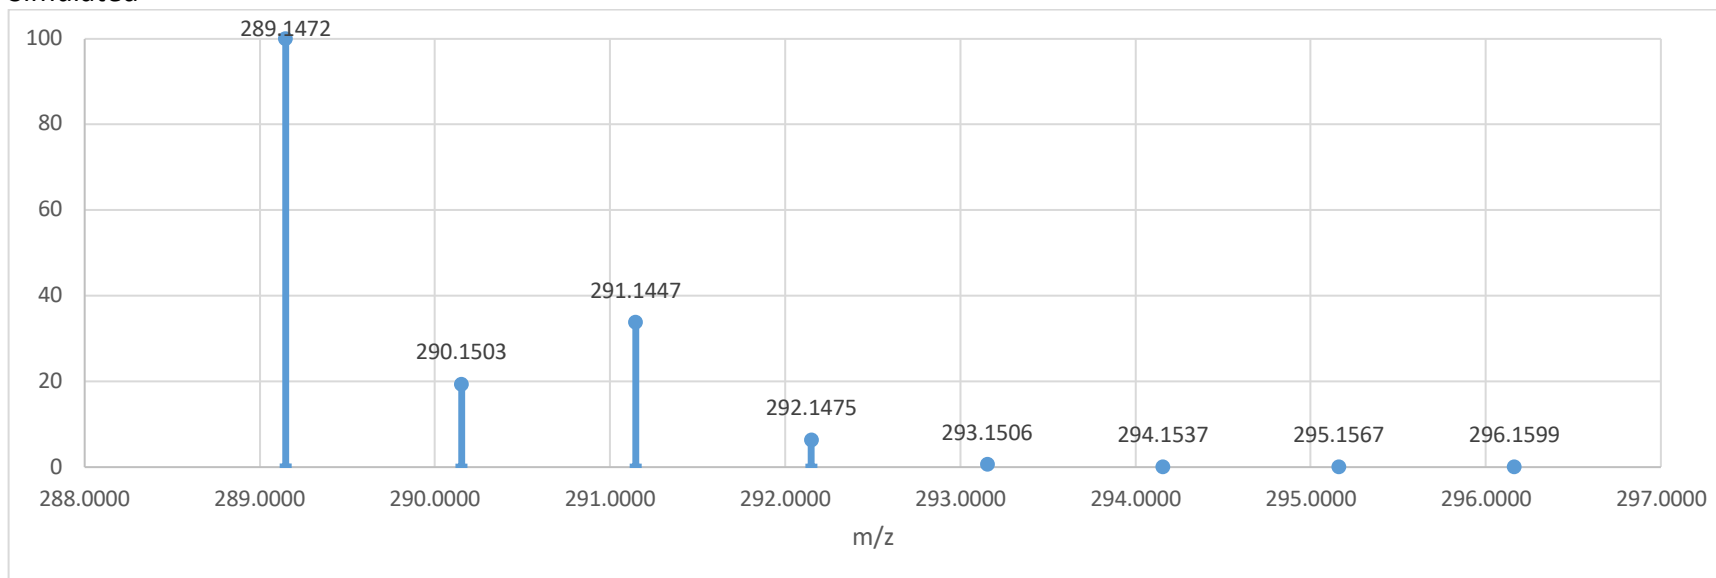



Measured

MS Zoomed Spectrum

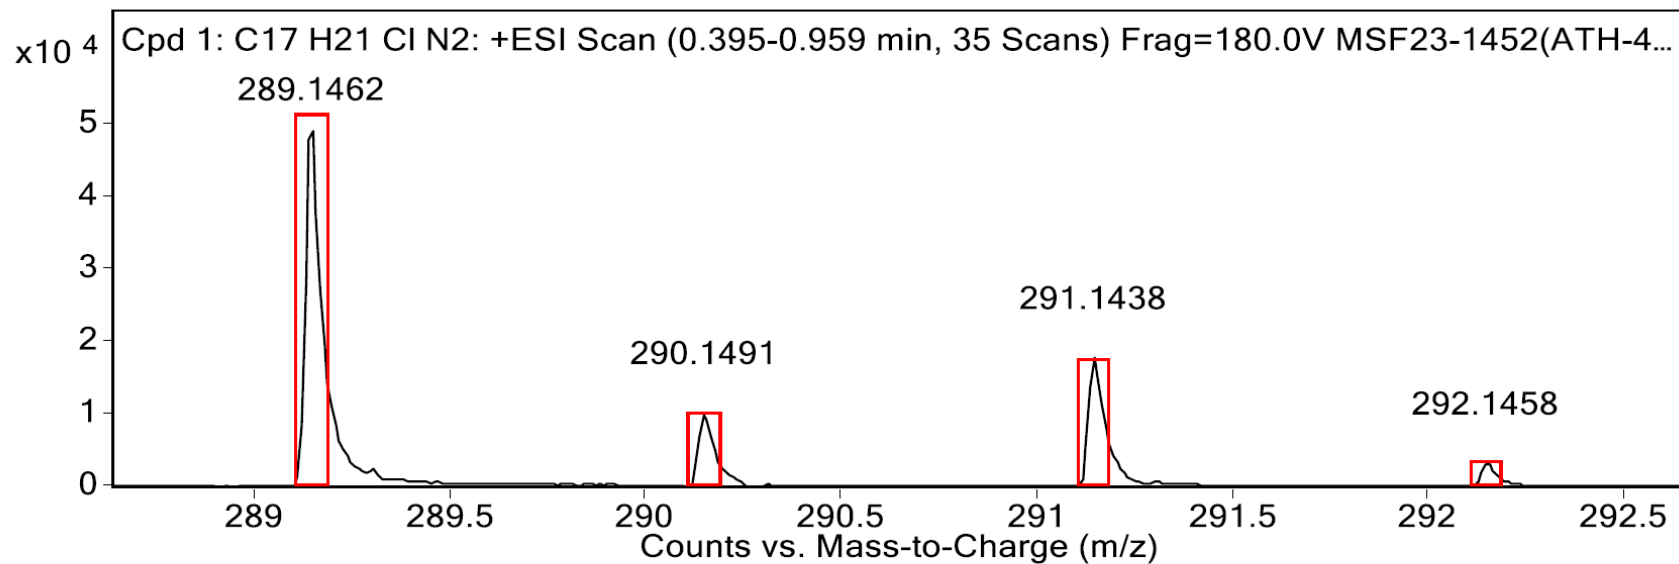

MS Spectrum Peak List

| Obs. m/z | Calc. m/z | Charge | Abundance | Formula    | Ion Species | Tgt Mass Error (ppm) |
|----------|-----------|--------|-----------|------------|-------------|----------------------|
| 272.1194 |           |        | 1794913   |            |             |                      |
| 289.1462 | 289.1466  | 1      | 50341     | C17H21ClN2 | (M+H)+      | 1.4                  |
| 290.1491 | 290.1498  | 1      | 10365     | C17H21ClN2 | (M+H)+      | 2.27                 |
| 291.1438 | 291.1441  | 1      | 17968     | C17H21ClN2 | (M+H)+      | 1.08                 |
| 292.1458 | 292.1470  | 1      | 3362      | C17H21ClN2 | (M+H)+      | 3.94                 |

--- End Of Report ---

## J. NMR Spectra

<sup>1</sup>H, 500.35 Hz, CDCl<sub>3</sub>

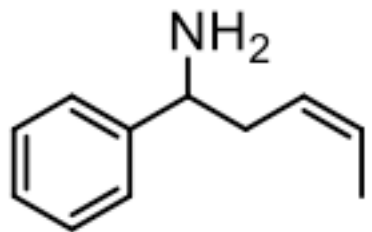

**1a**

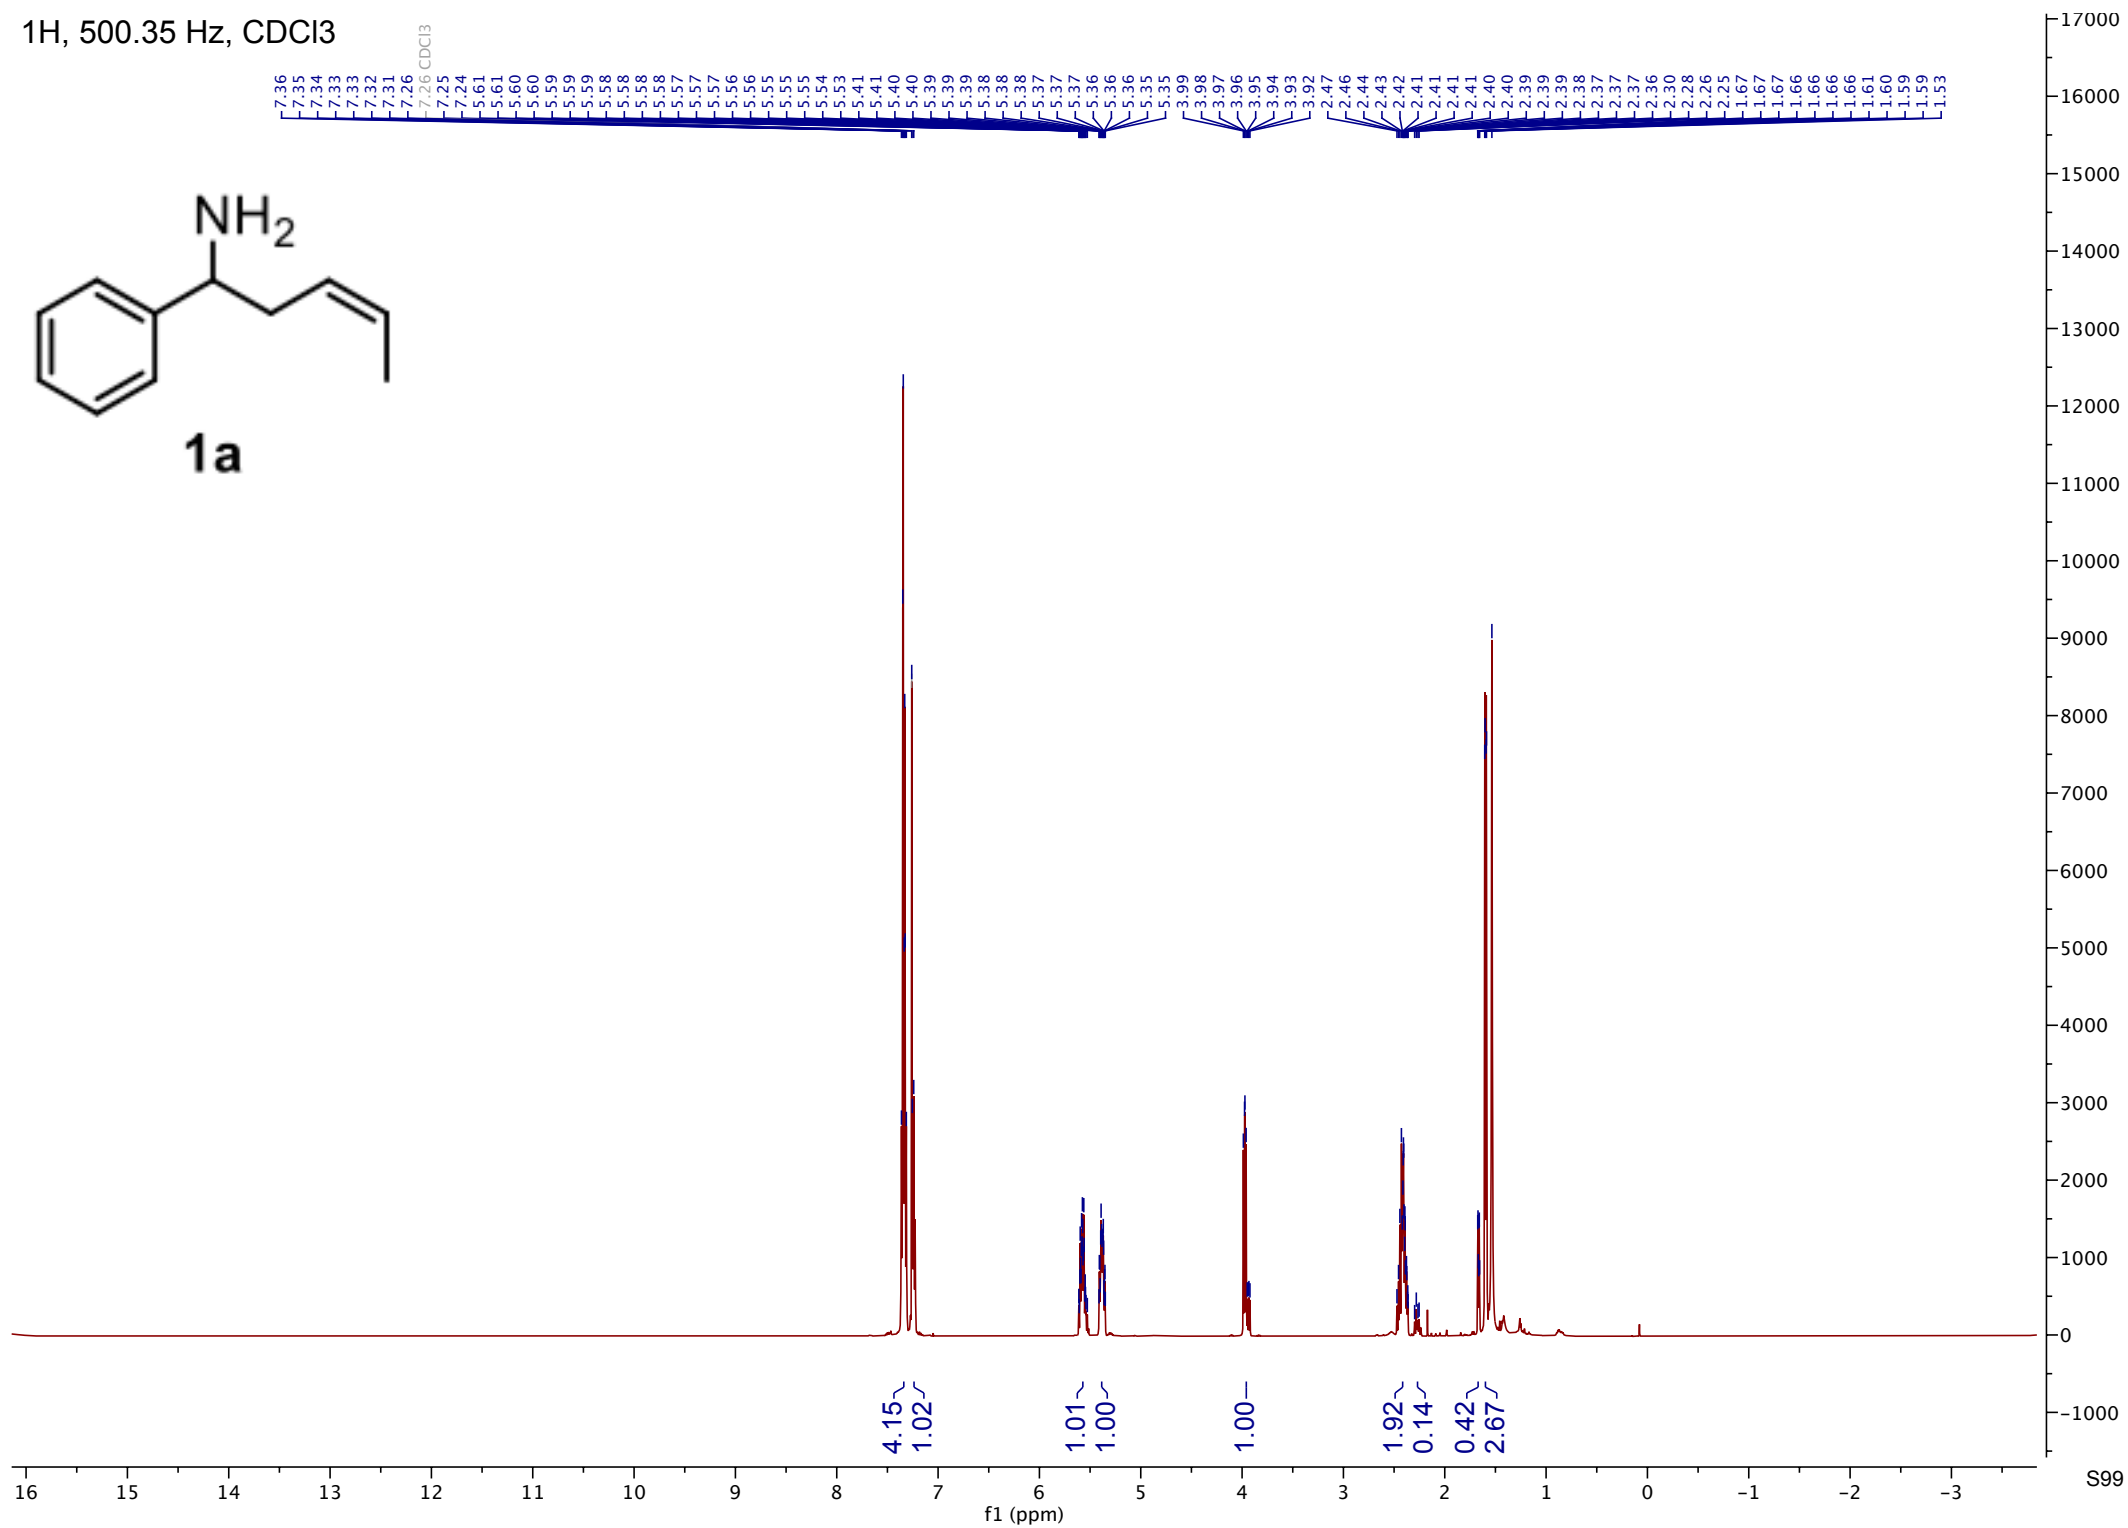

$^{13}\text{C}$ , 125.83 Hz,  $\text{CDCl}_3$



**1a**

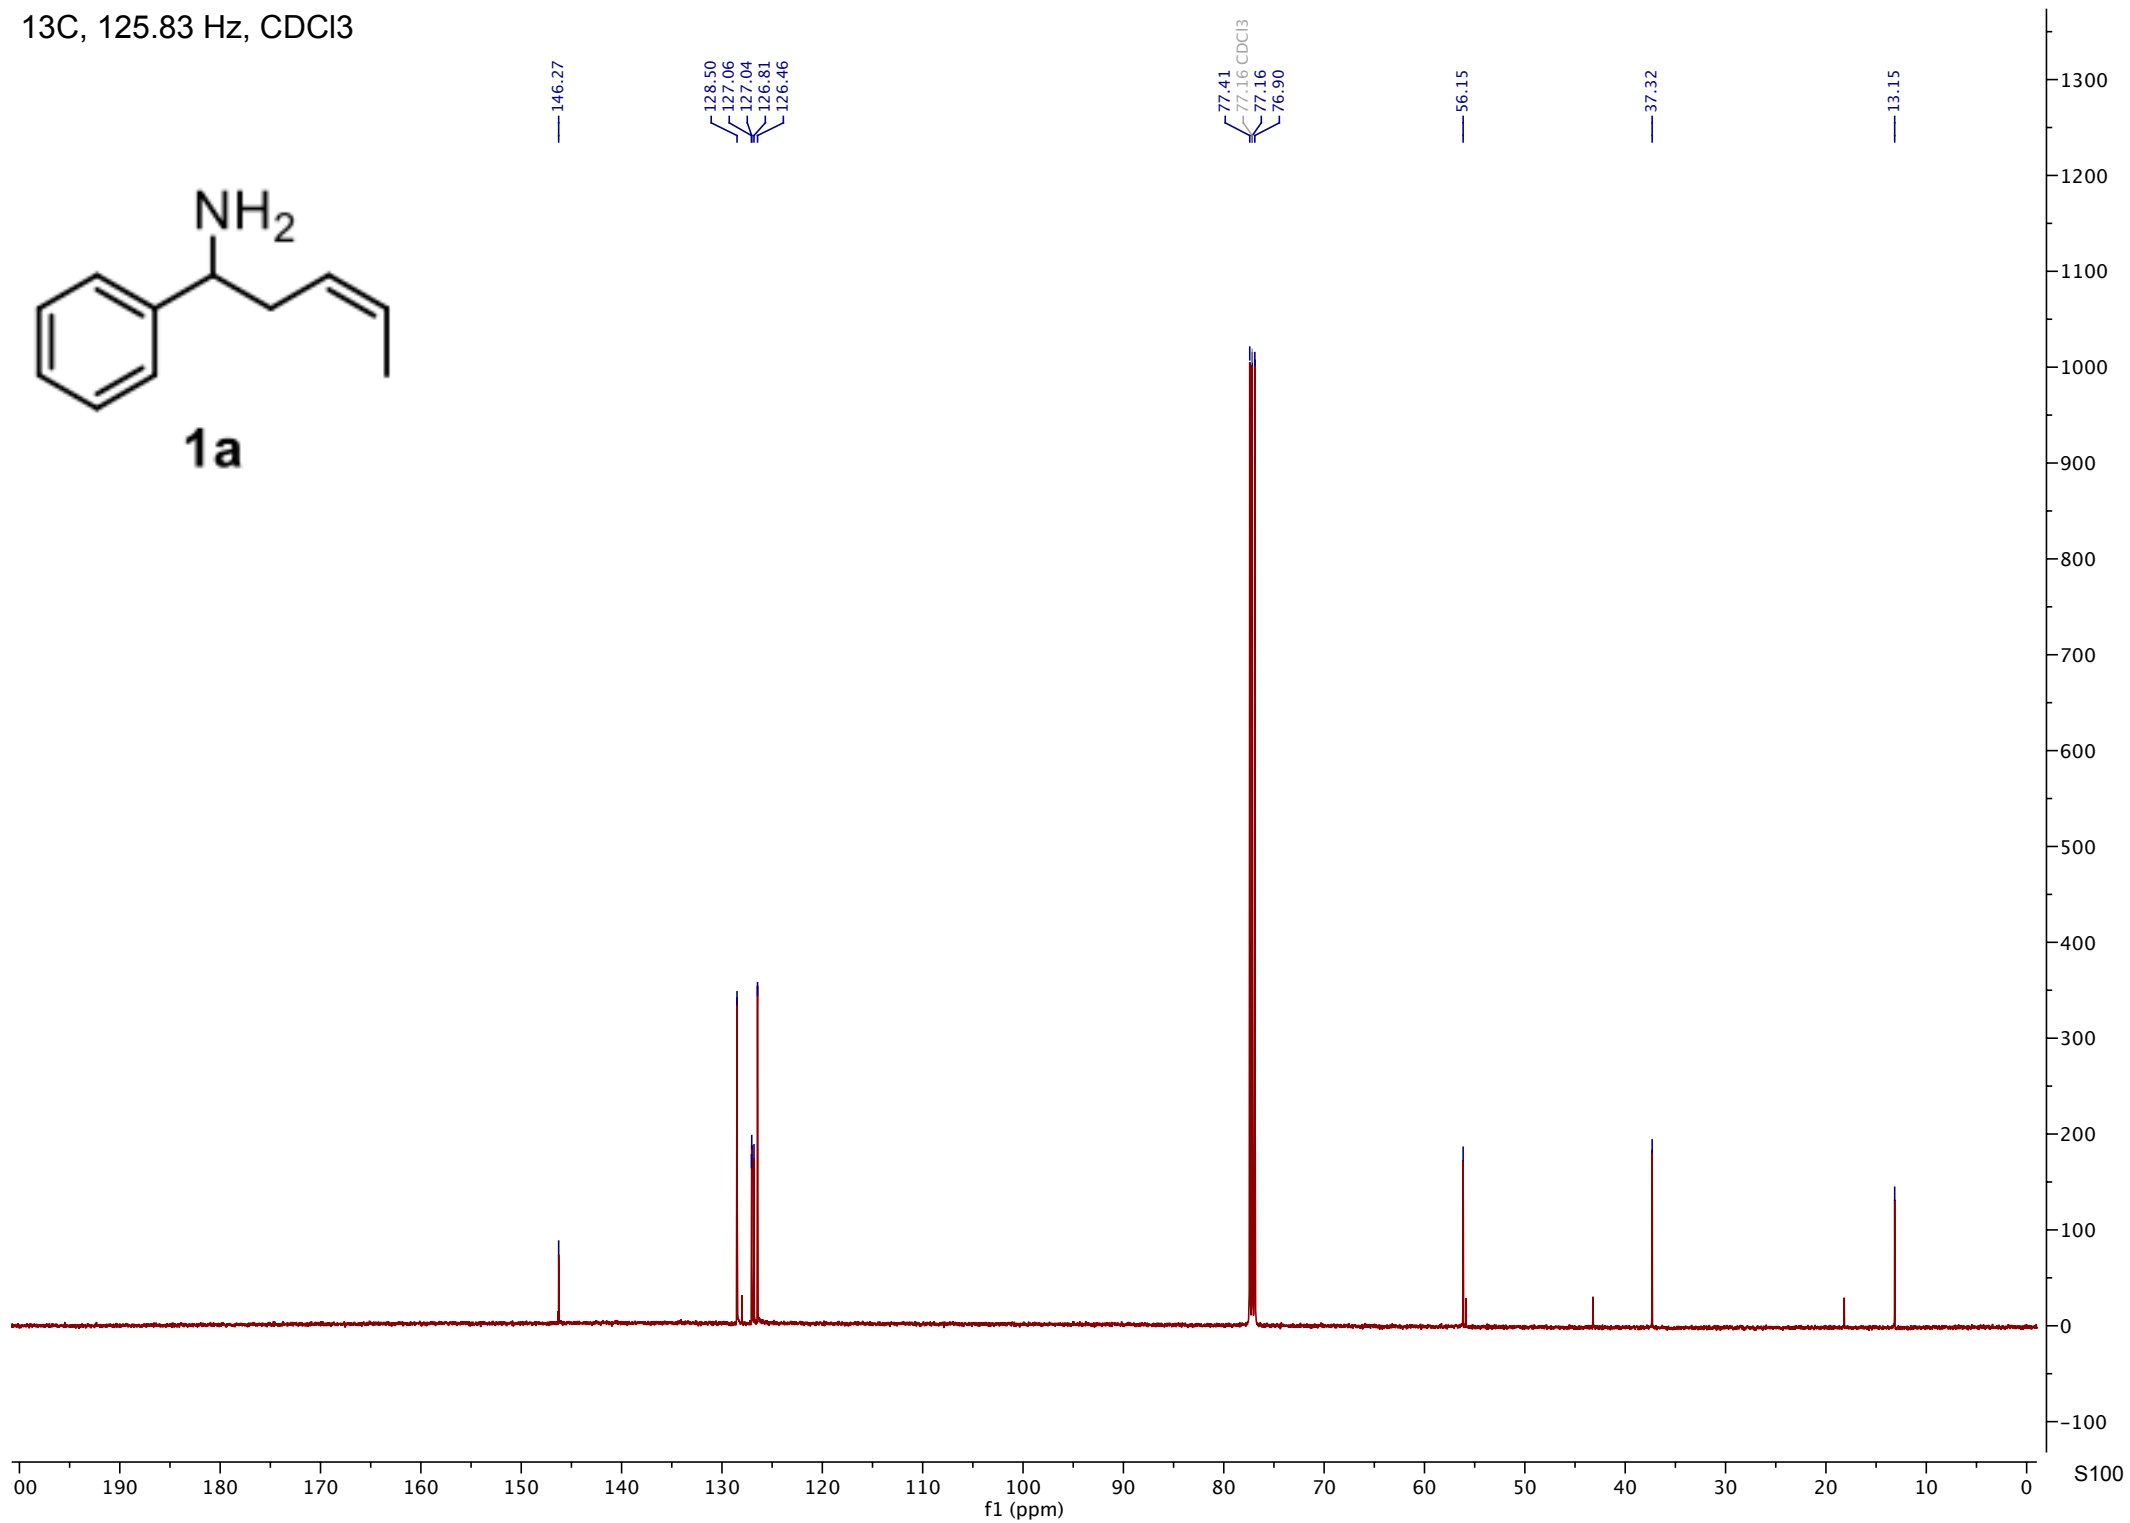

<sup>1</sup>H, 500.35 Hz, CDCl<sub>3</sub>

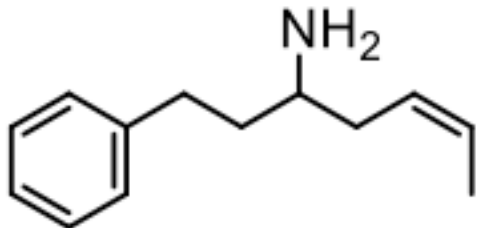

**1b**

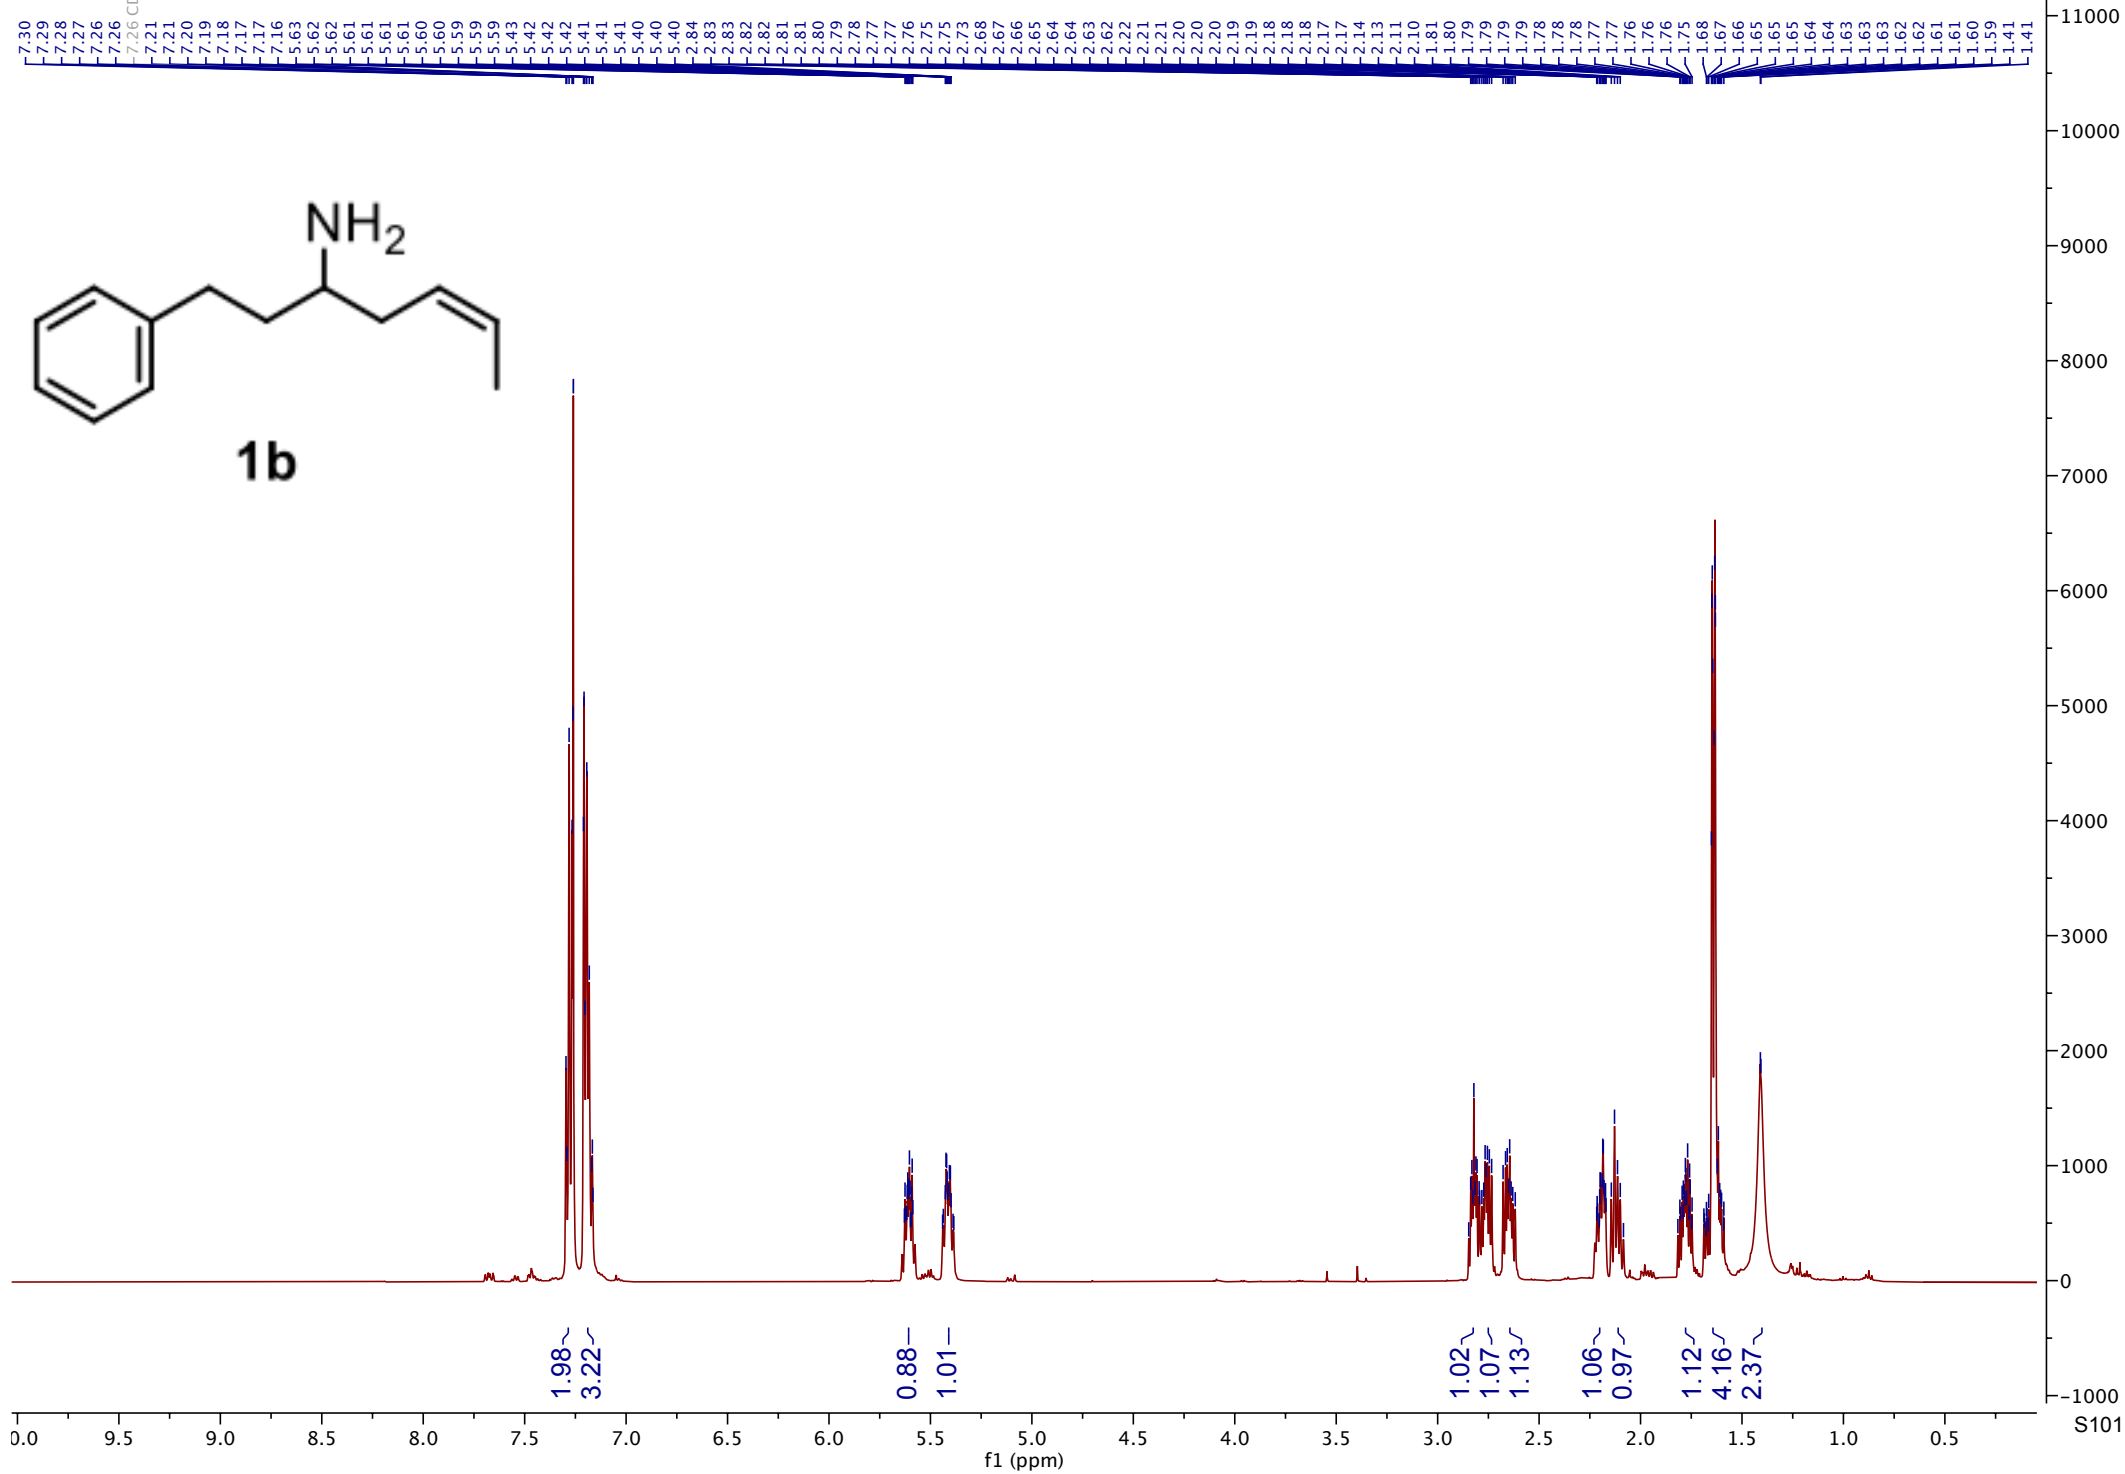

$^{13}\text{C}$ , 125.83 Hz,  $\text{CDCl}_3$

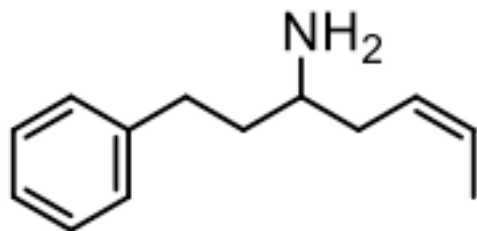

**1b**

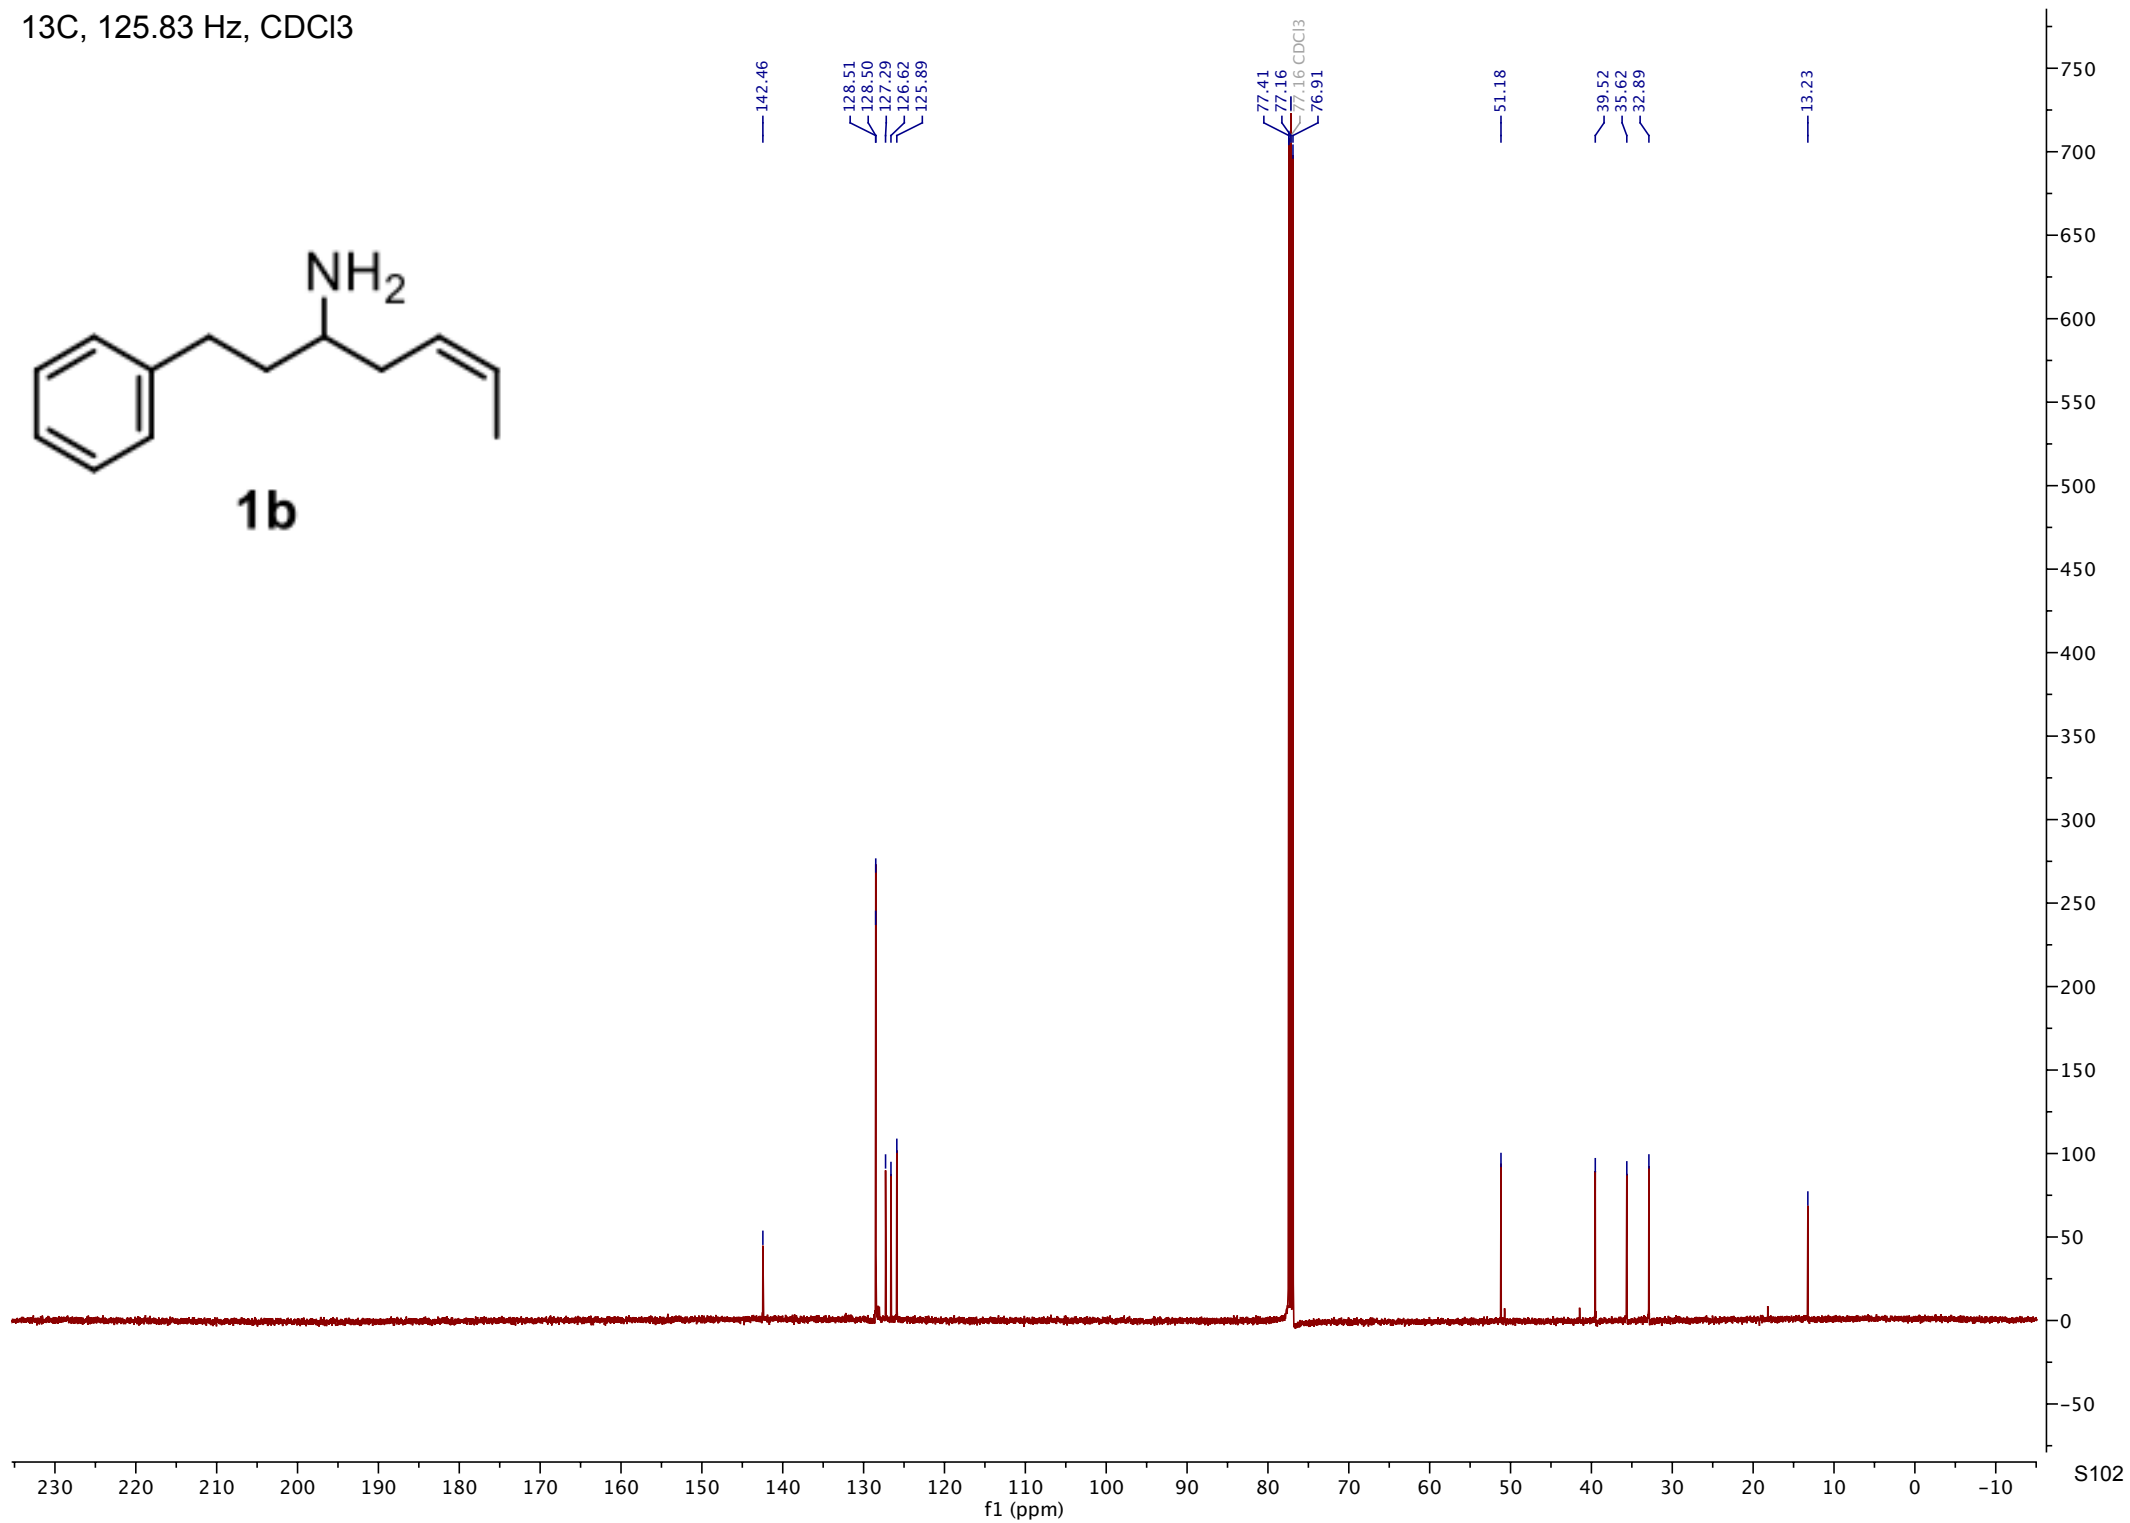

<sup>1</sup>H, 399.81 Hz, CDCl<sub>3</sub>

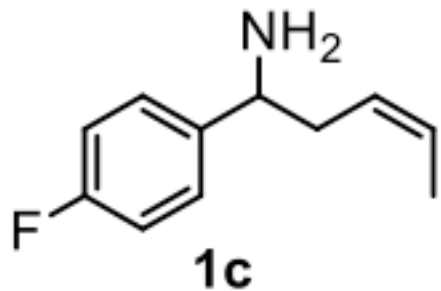

7.33  
7.31  
7.31  
7.29  
7.28  
7.27 CDCl<sub>3</sub>  
7.26 CDCl<sub>3</sub>  
7.02  
7.00  
6.98  
5.61  
5.59  
5.58  
5.57  
5.55  
5.53  
5.38  
5.37  
5.37  
5.36  
5.35  
5.35  
5.34  
5.34  
5.33  
5.33  
5.32  
5.31  
5.31  
5.30  
5.29  
3.97  
3.96  
3.95  
3.93  
3.92  
3.91

2.45  
2.43  
2.41  
2.39  
2.37  
2.36  
2.34  
2.32  
2.31  
1.64 H<sub>2</sub>O  
1.58  
1.57  
1.53  
1.51

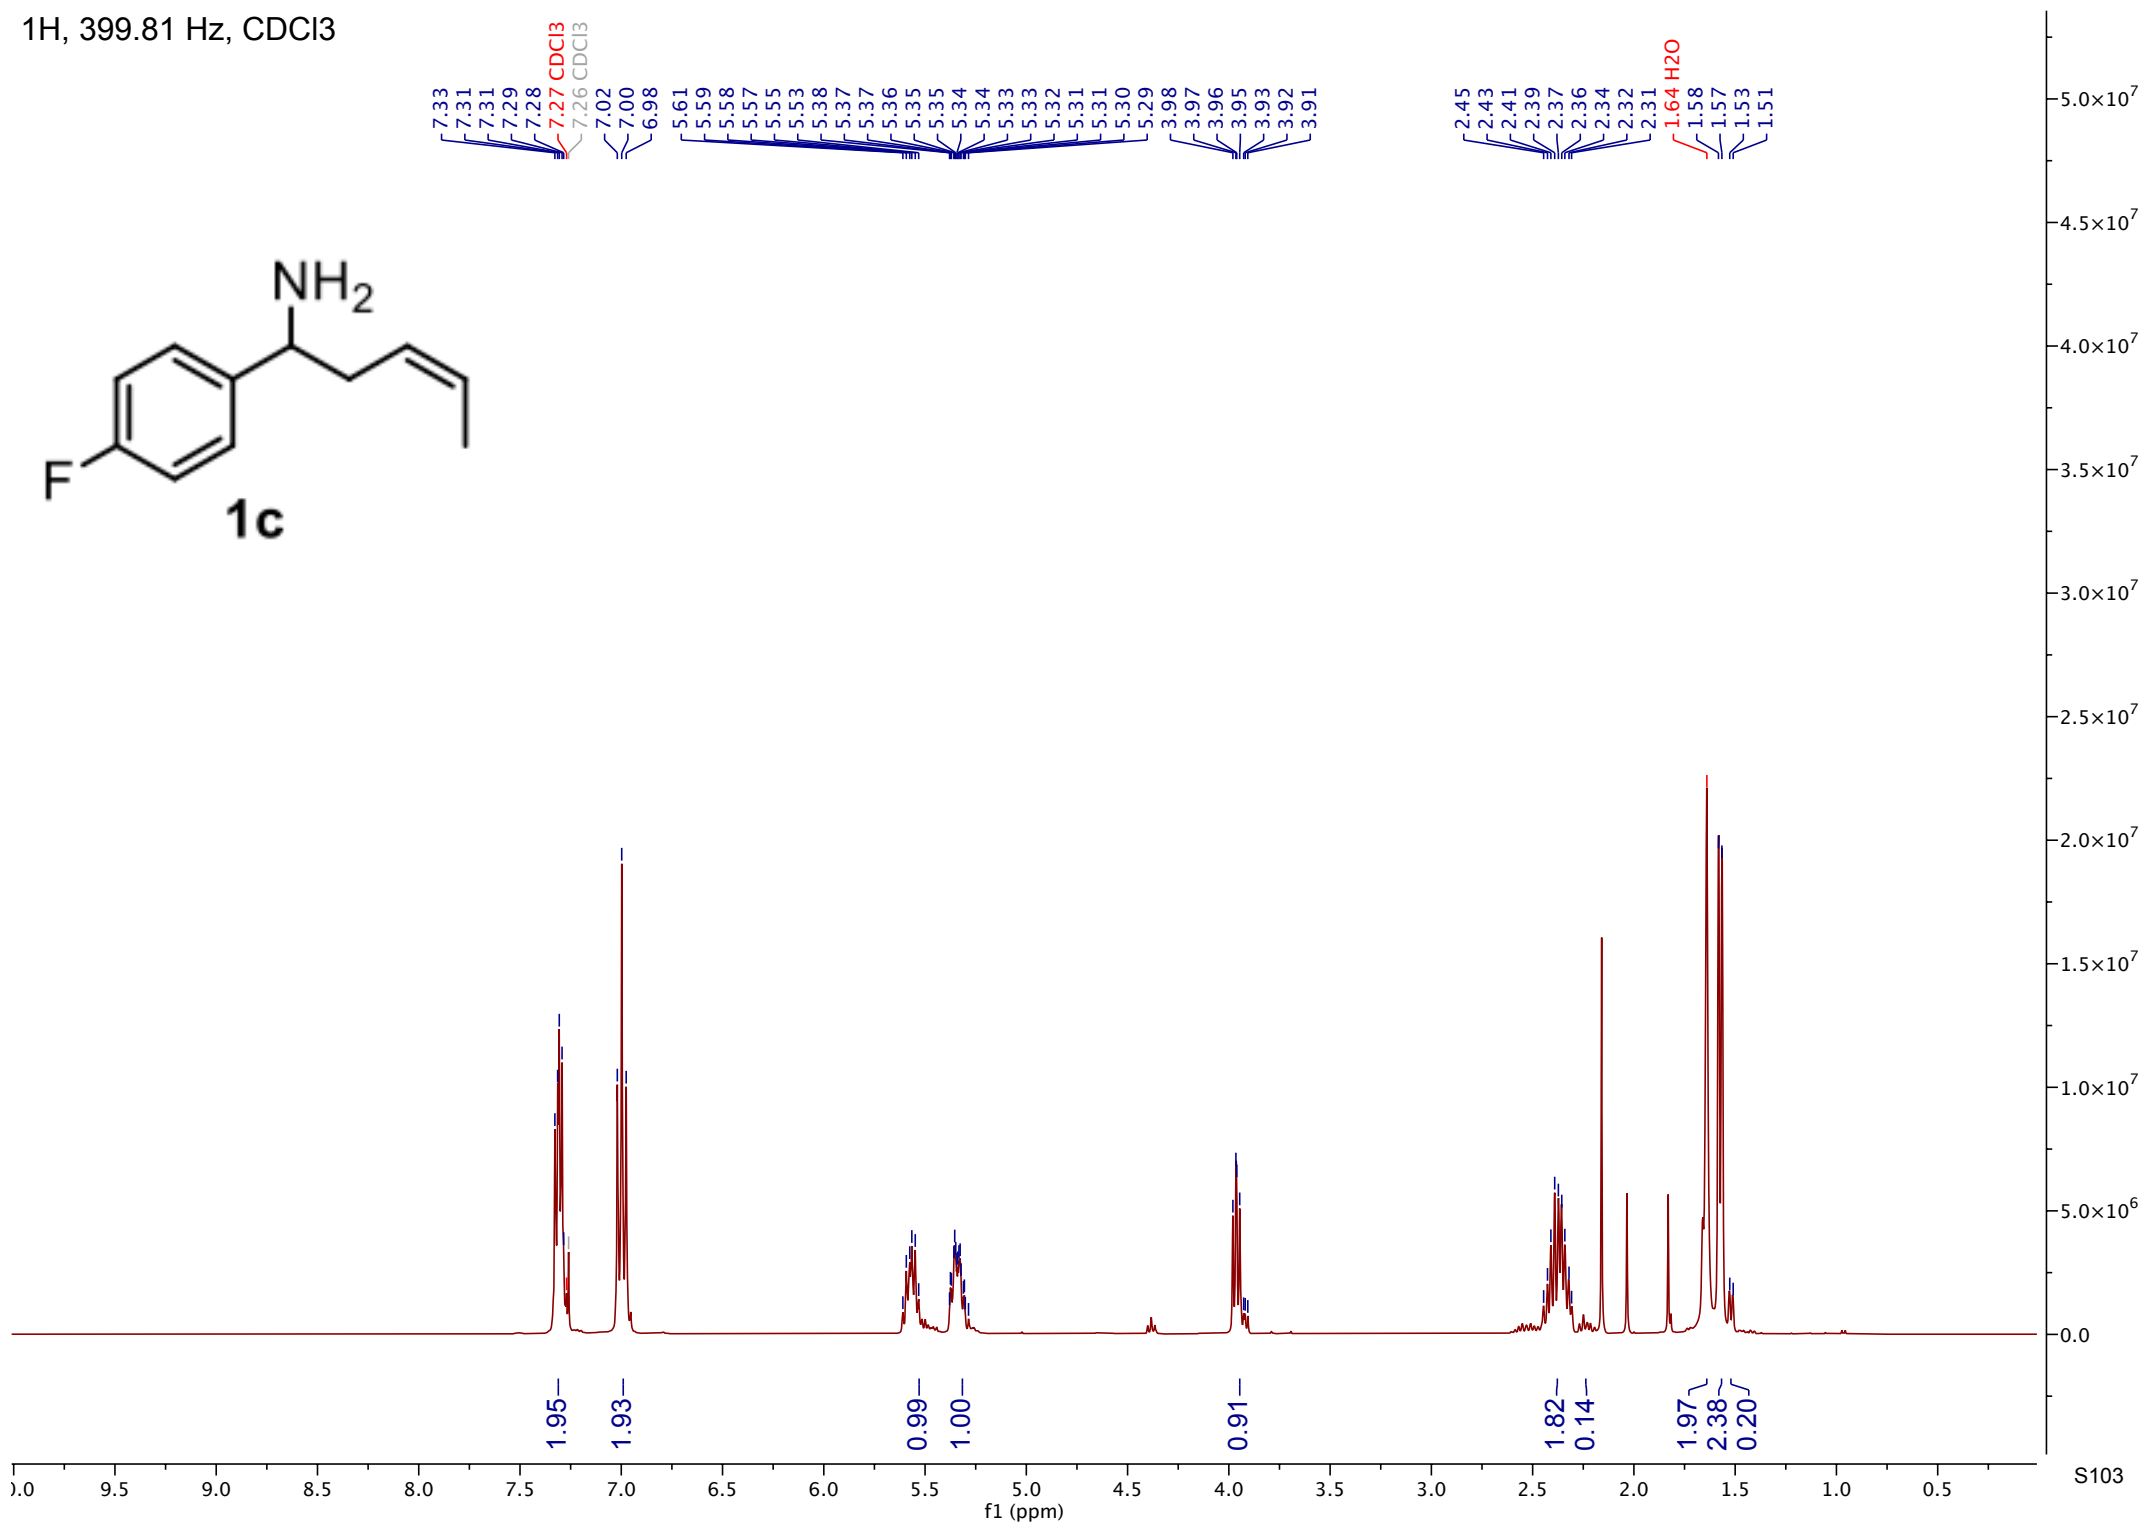

<sup>13</sup>C, 100.54 Hz, CDCl<sub>3</sub>

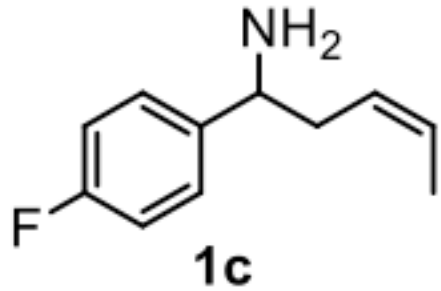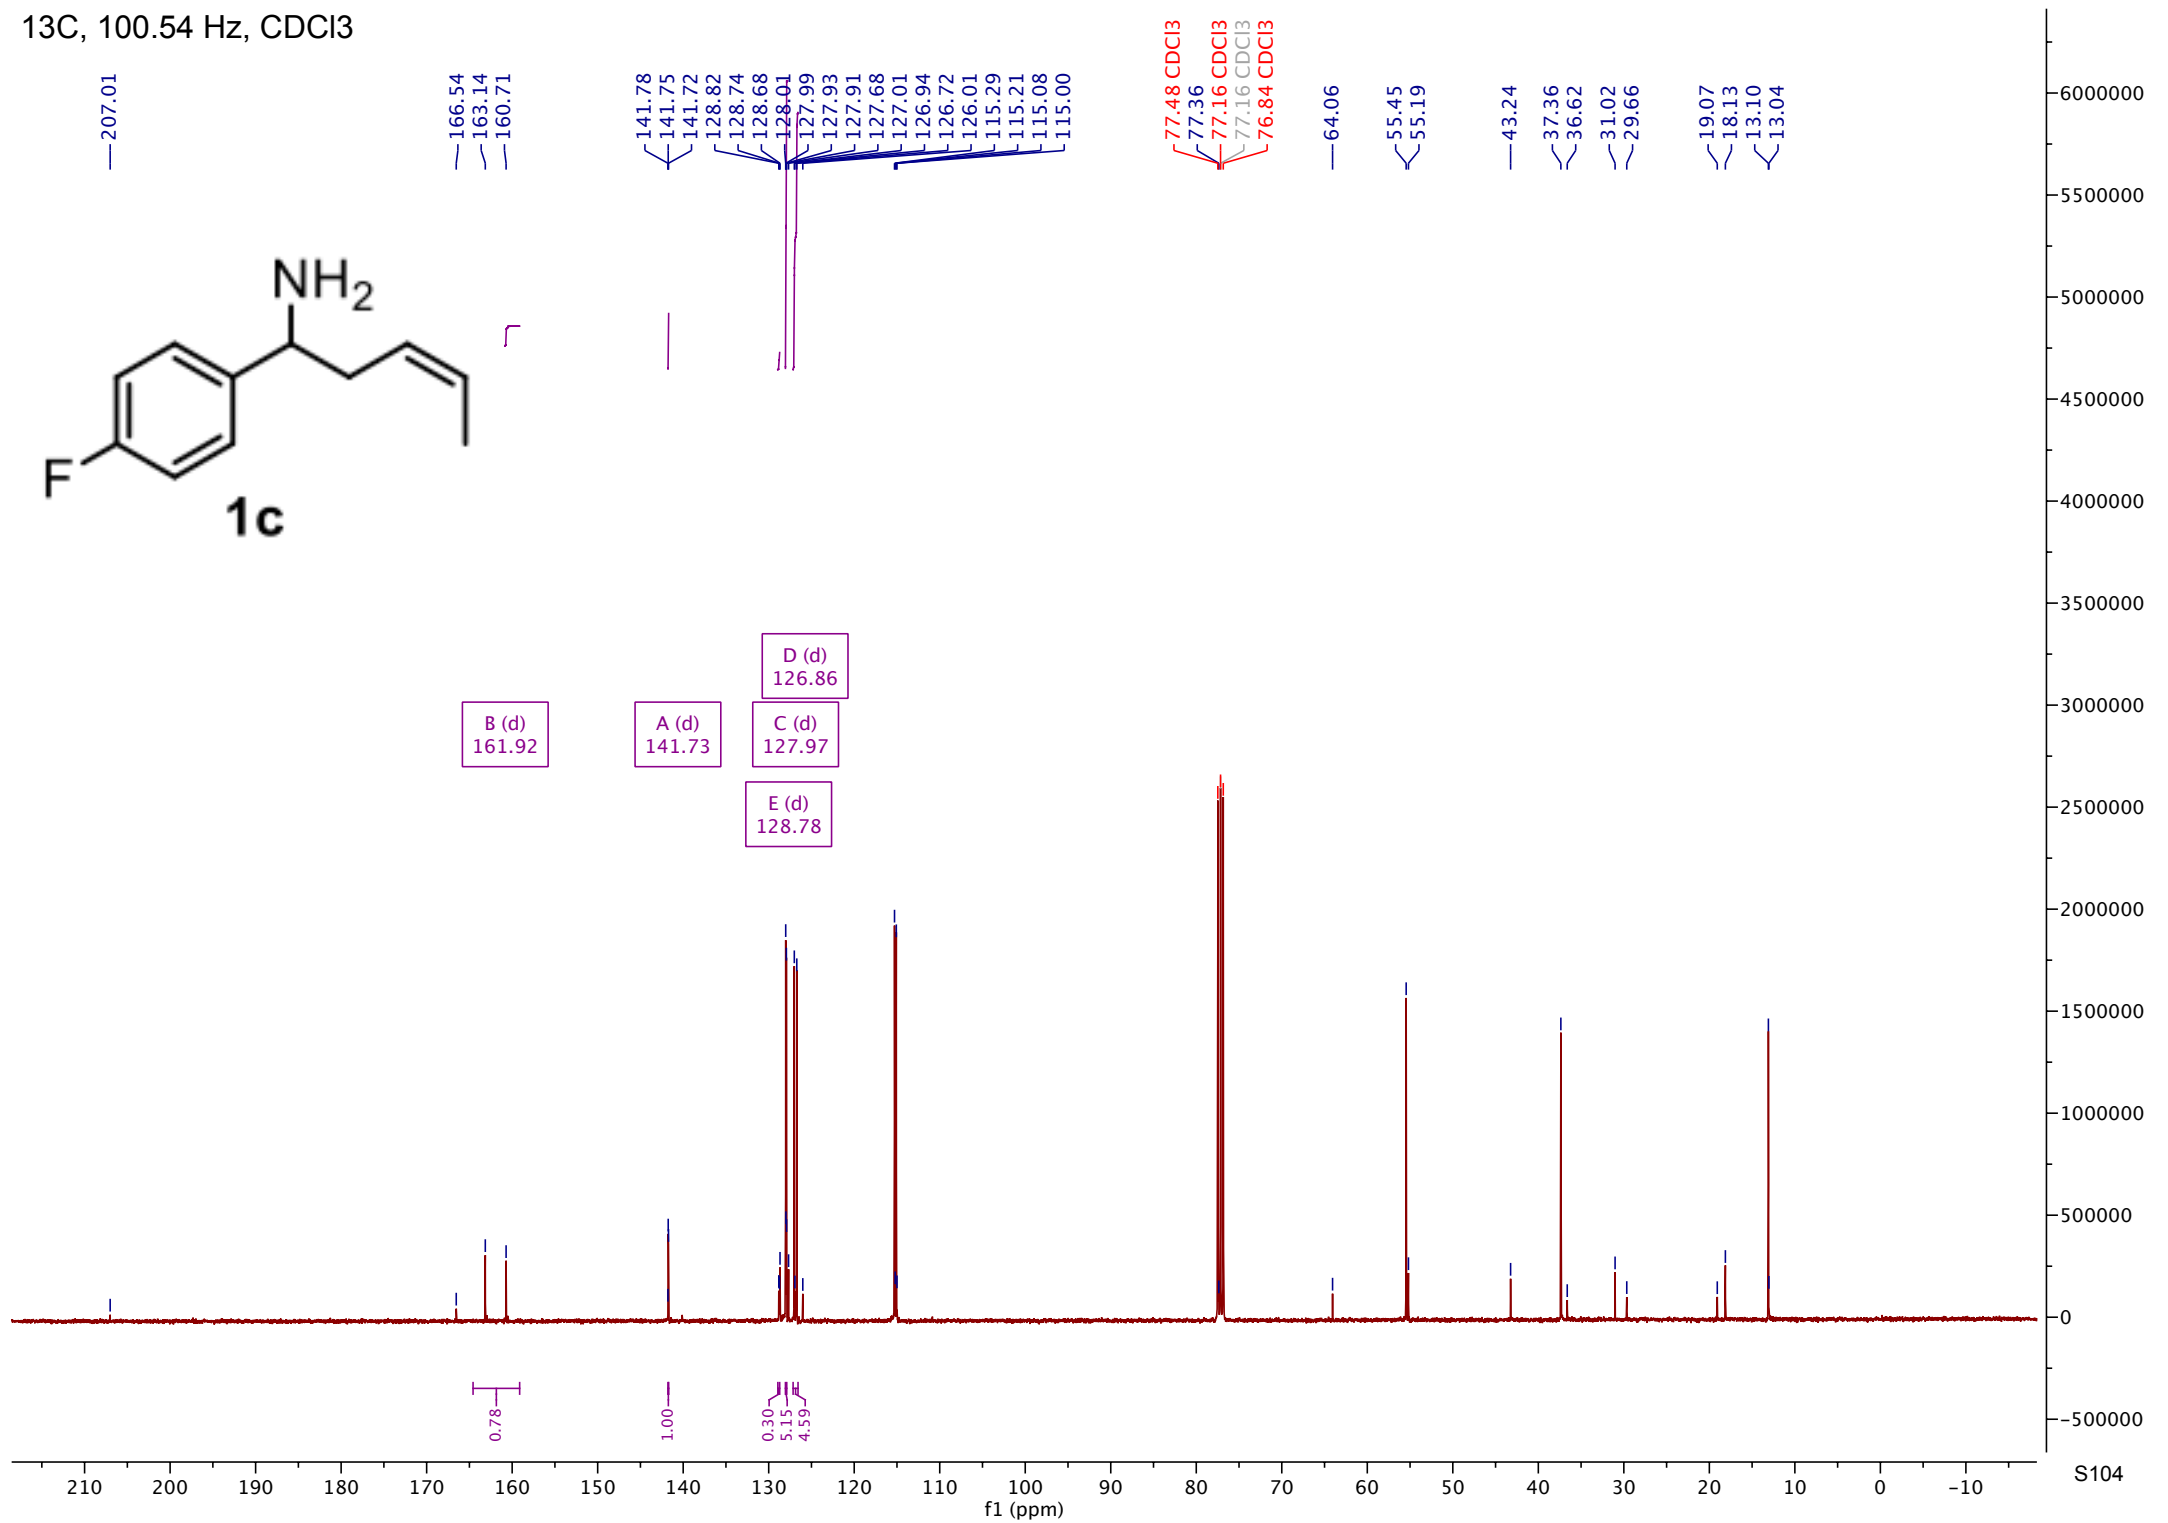



19F, 376.30 Hz, cdcl3

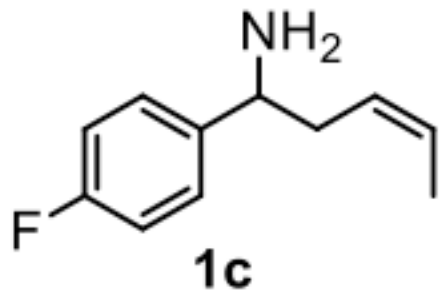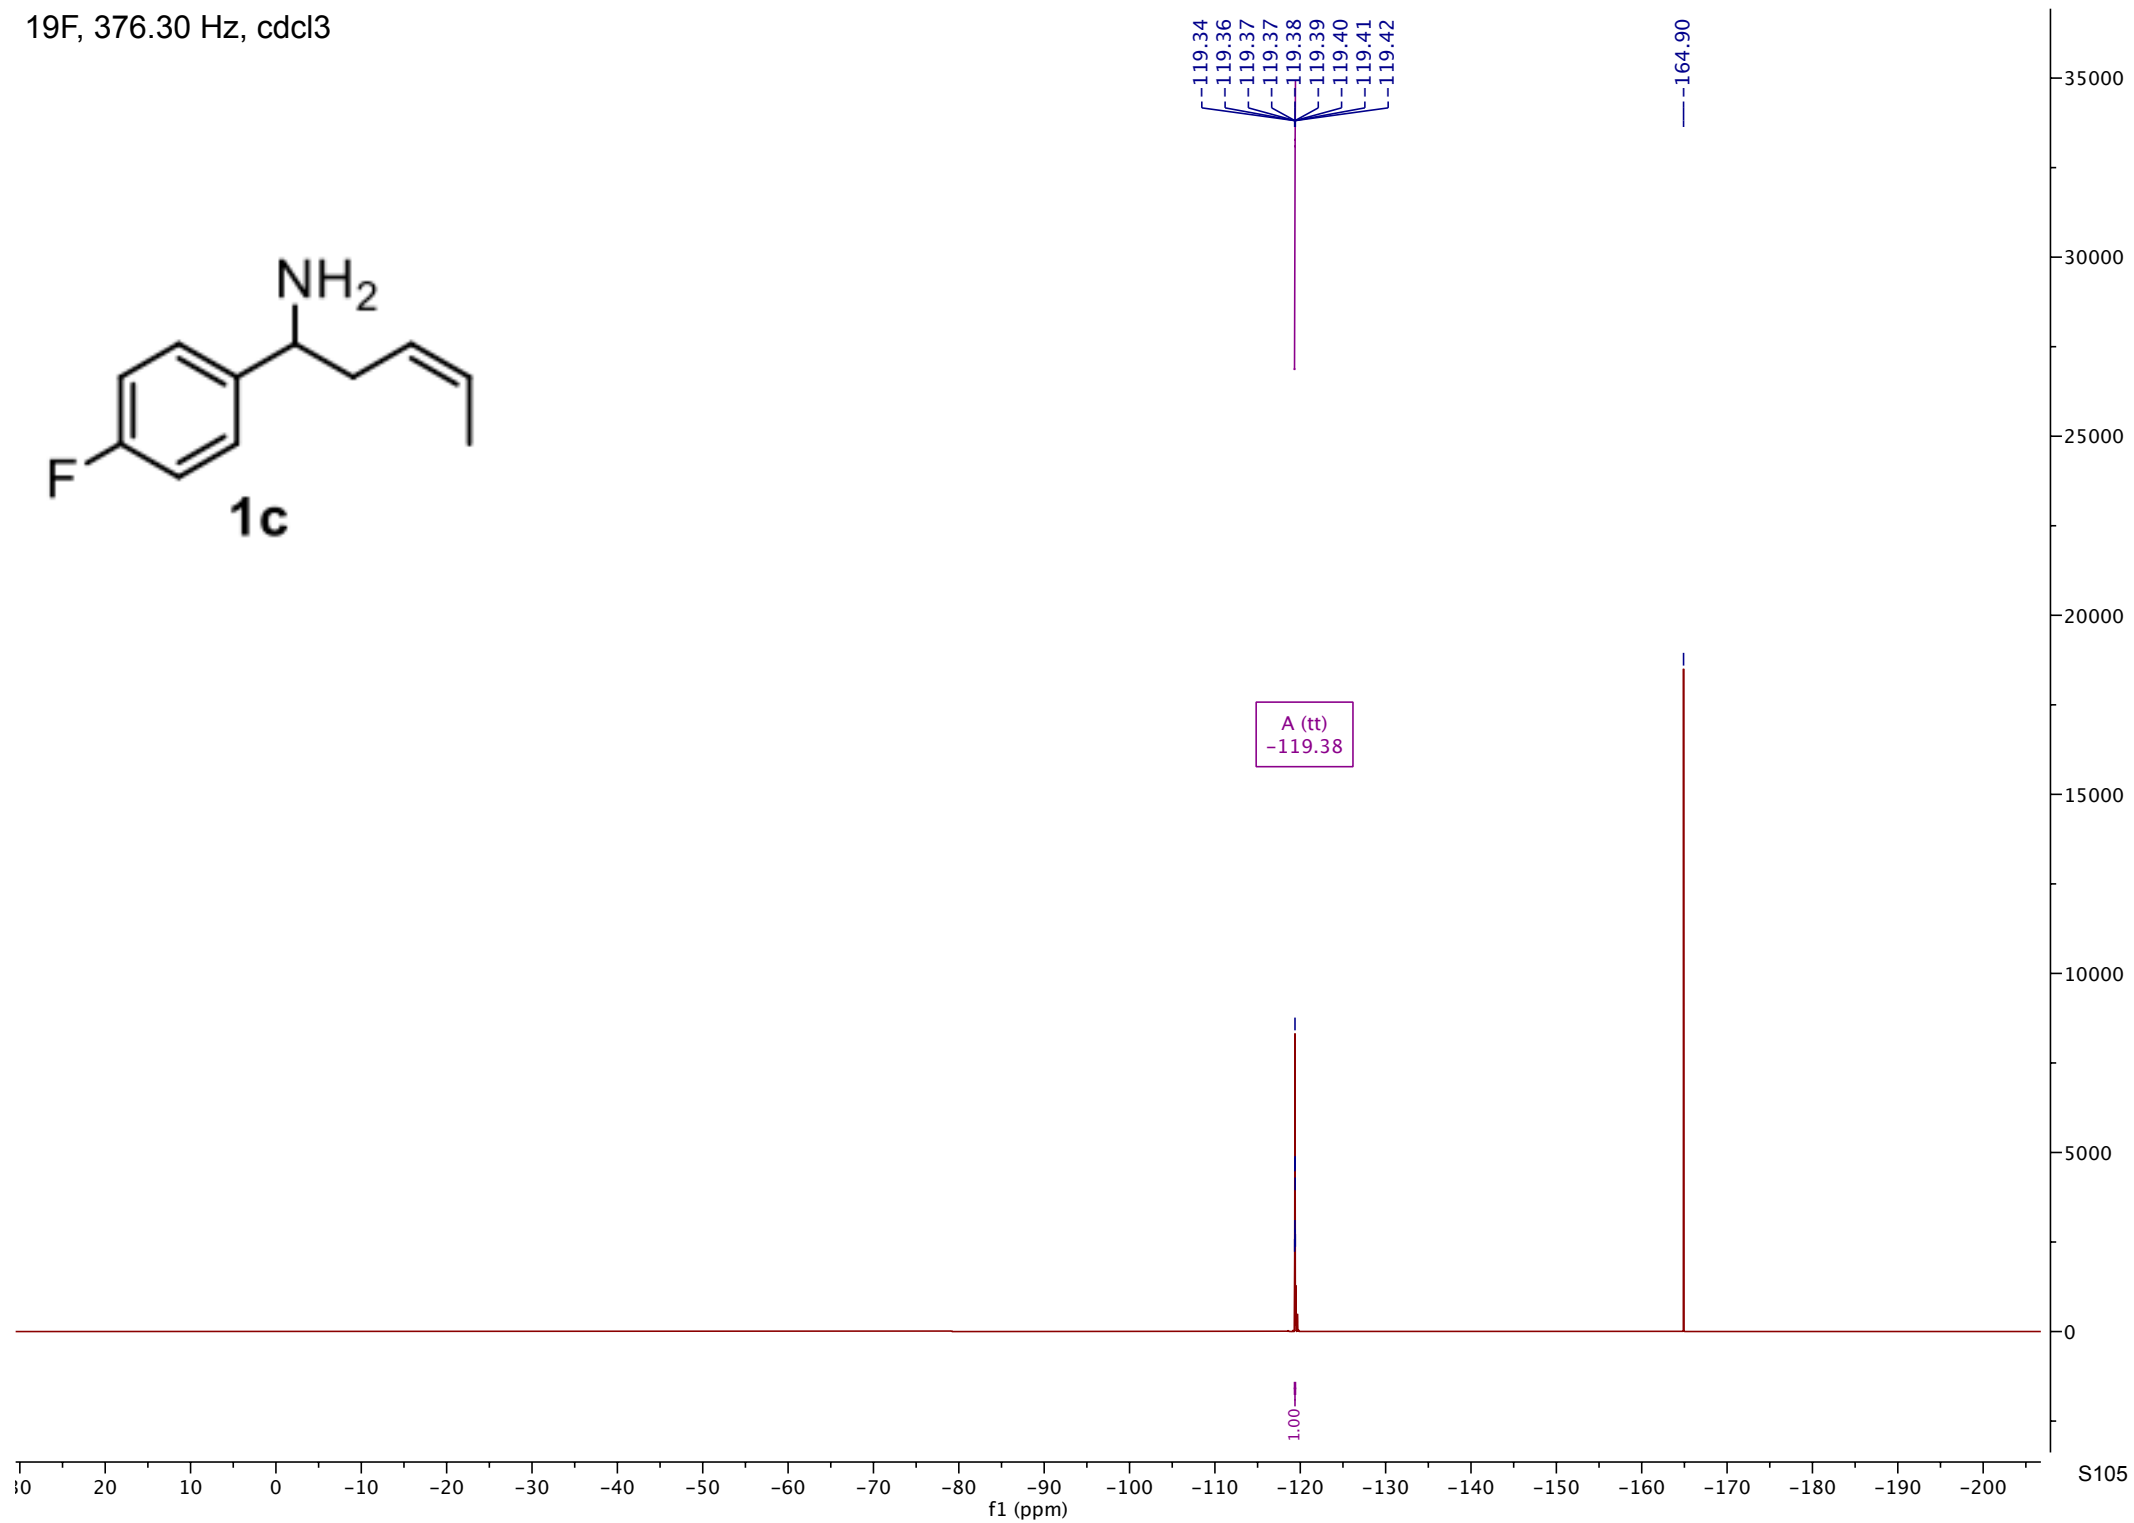

<sup>1</sup>H, 500.35 Hz, CDCl<sub>3</sub>

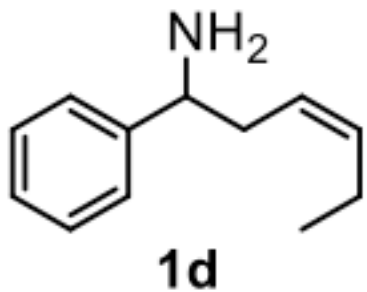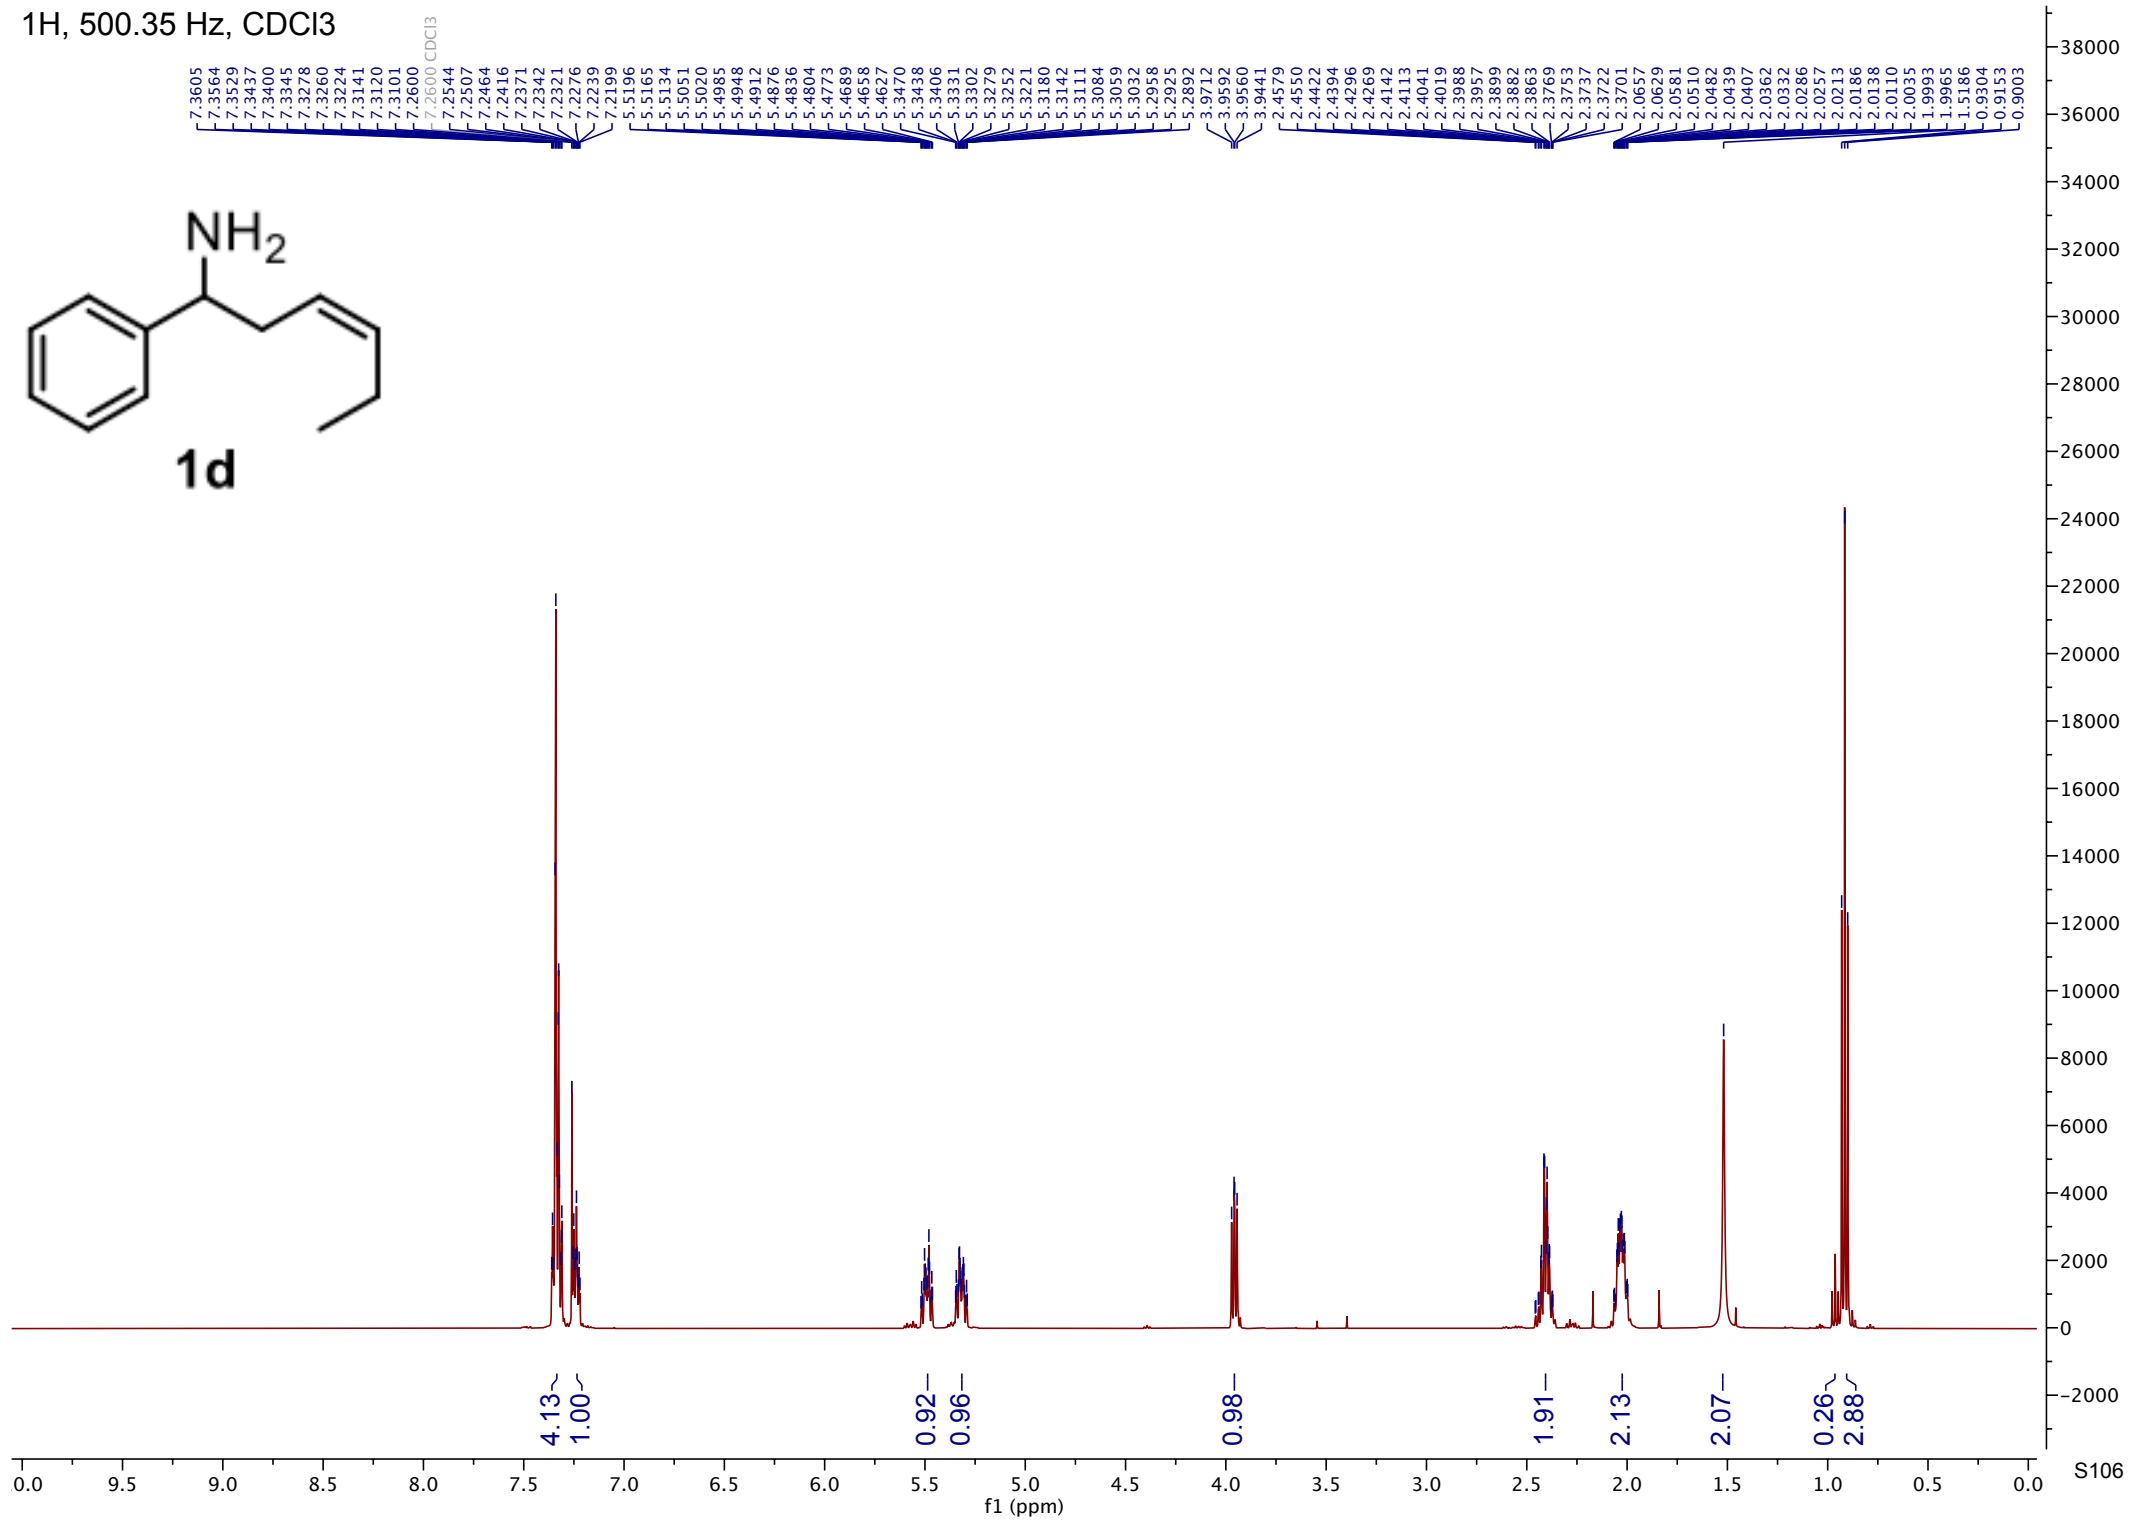

$^{13}\text{C}$ , 125.83 Hz,  $\text{CDCl}_3$

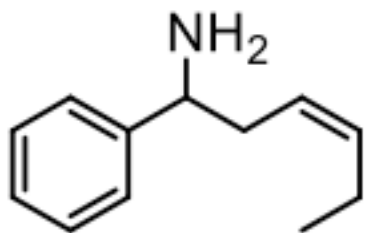

**1d**

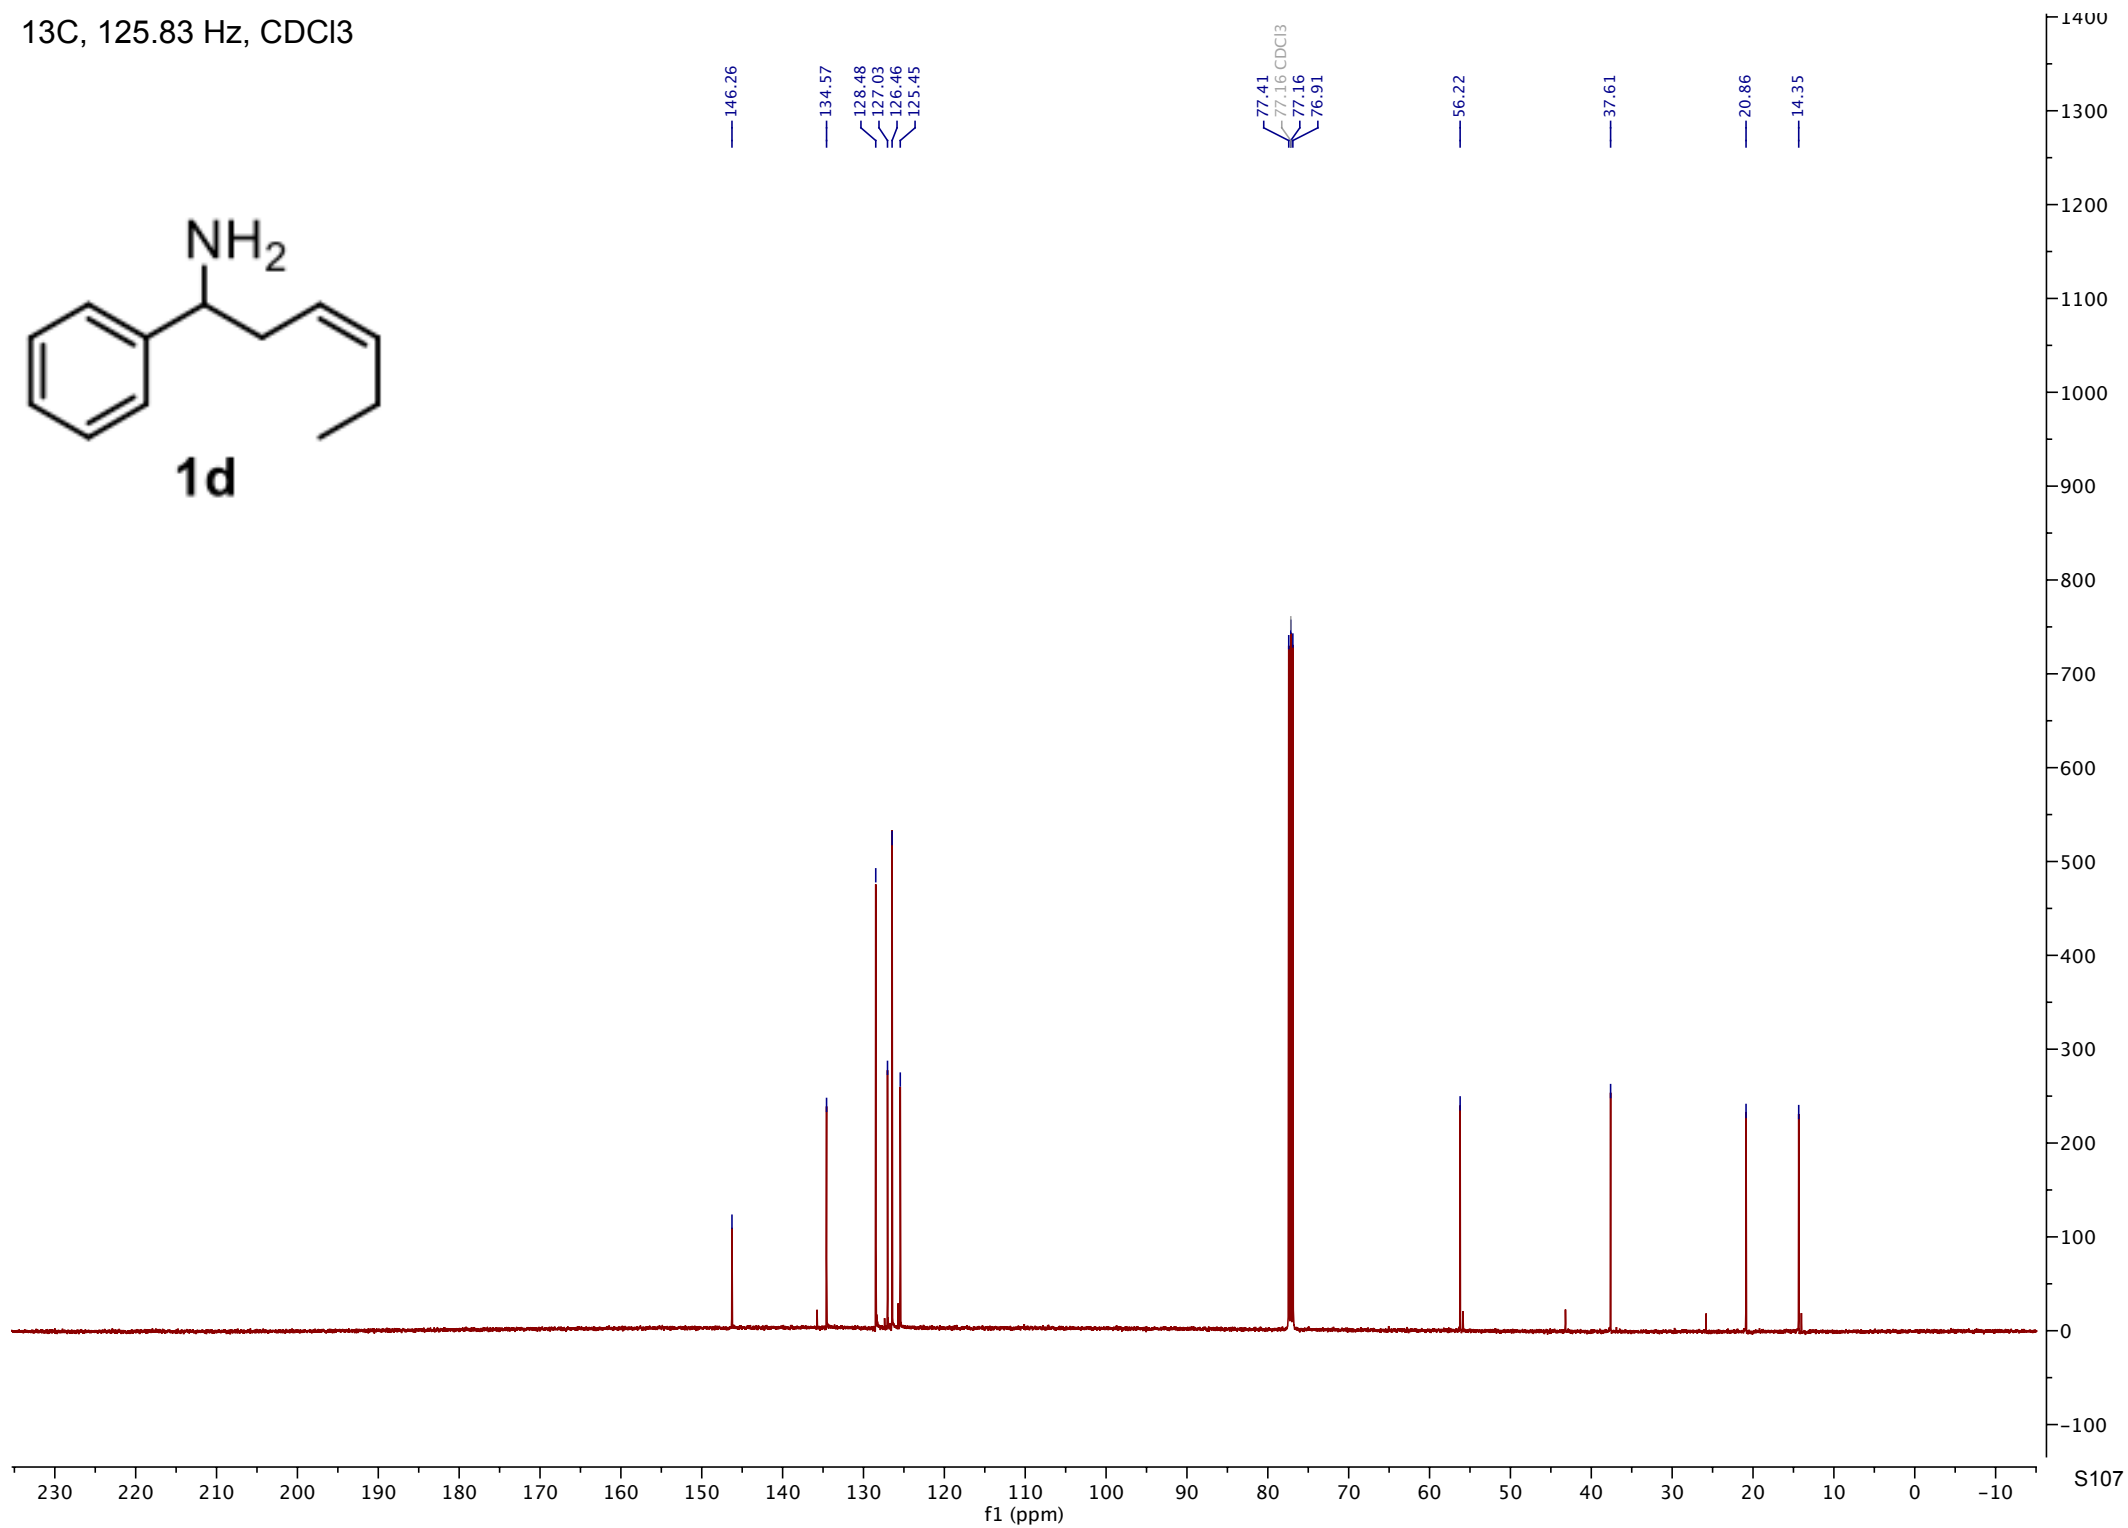



$^{13}\text{C}$ , 125.83 Hz,  $\text{CDCl}_3$

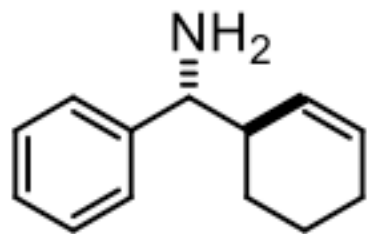

**1e**

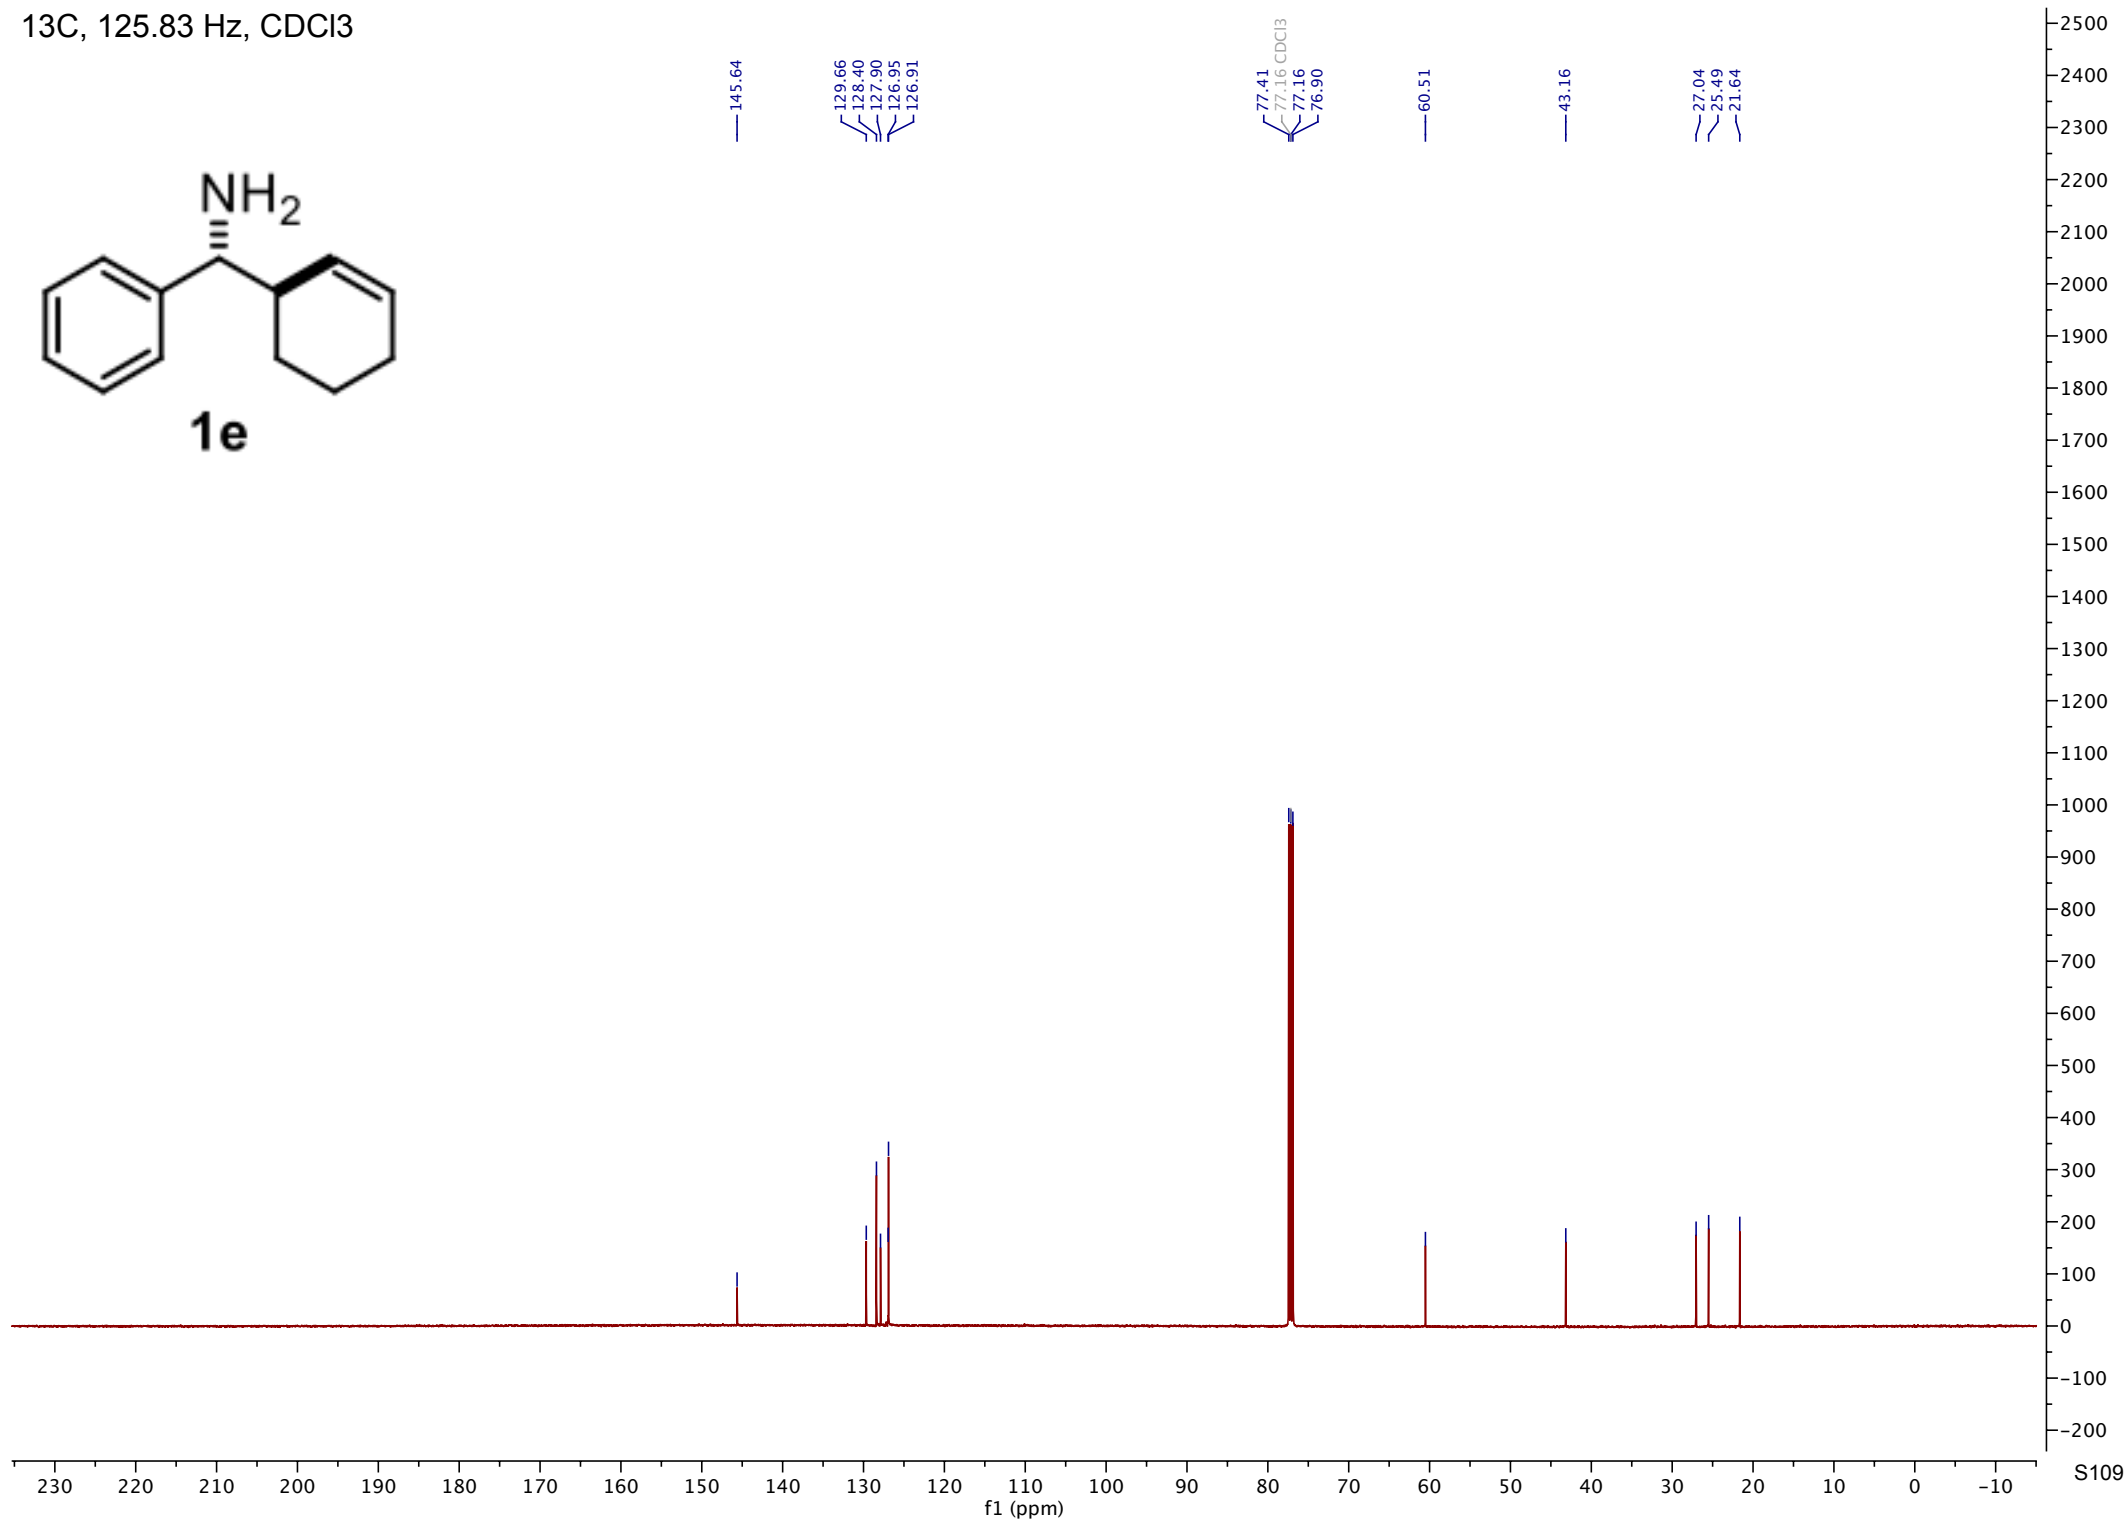

<sup>1</sup>H, 500.35 Hz, CDCl<sub>3</sub>

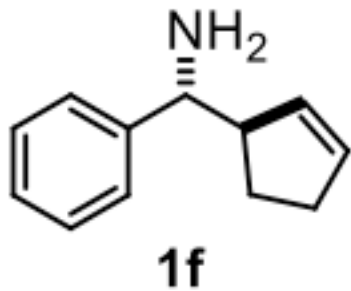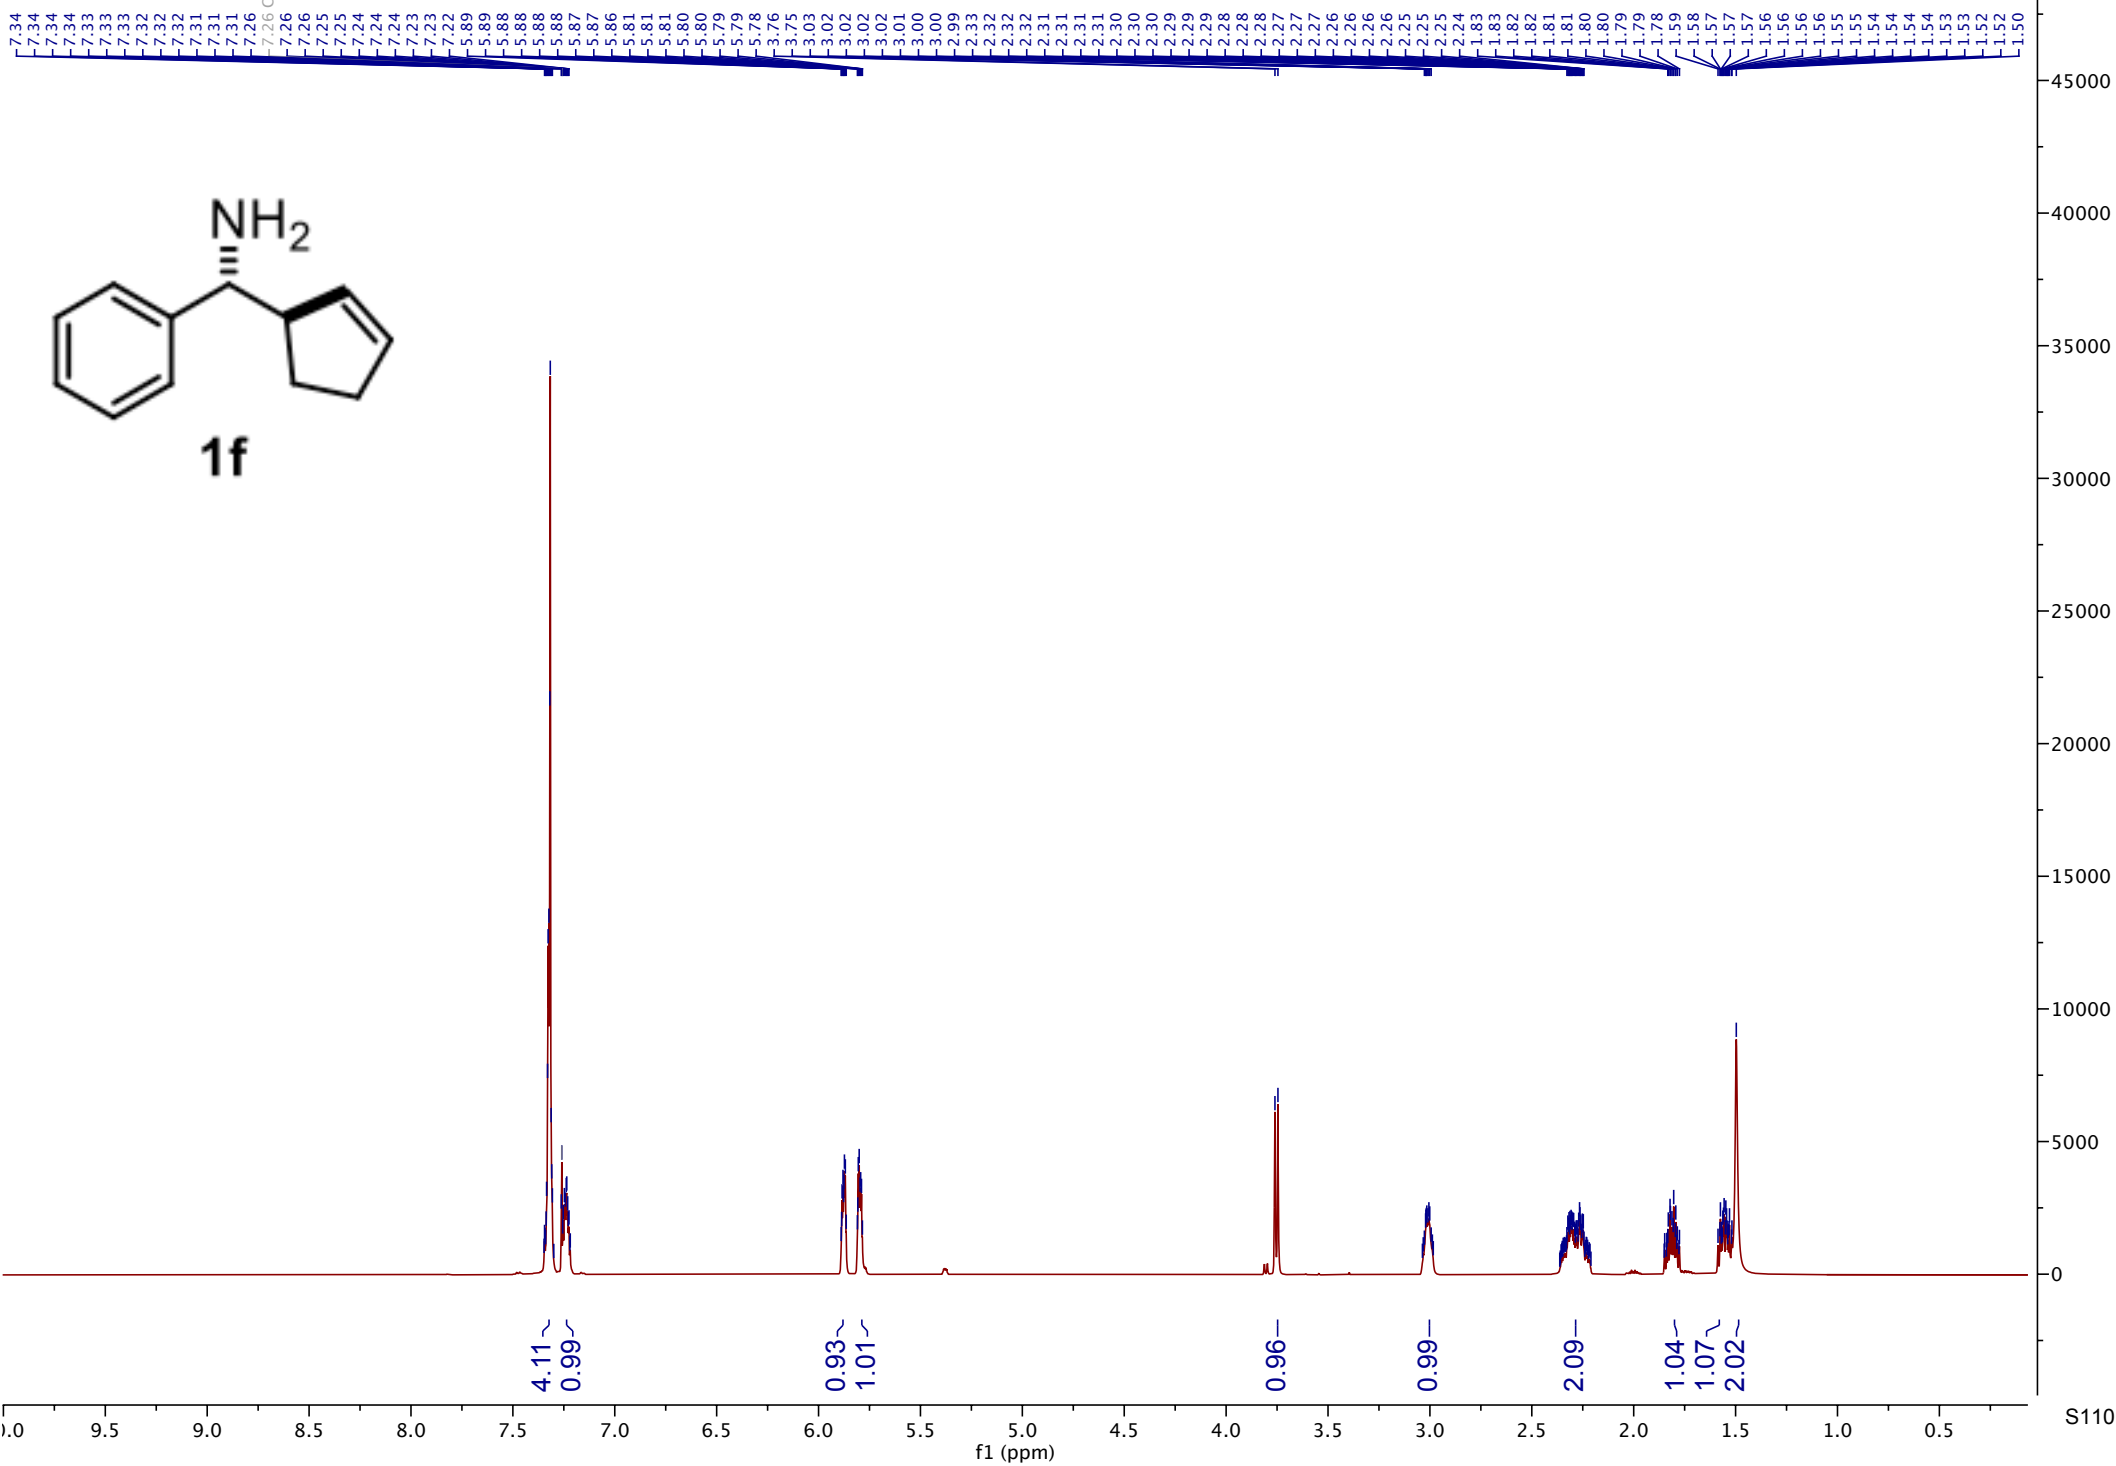

$^{13}\text{C}$ , 125.83 Hz,  $\text{CDCl}_3$

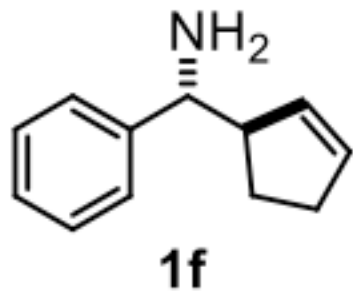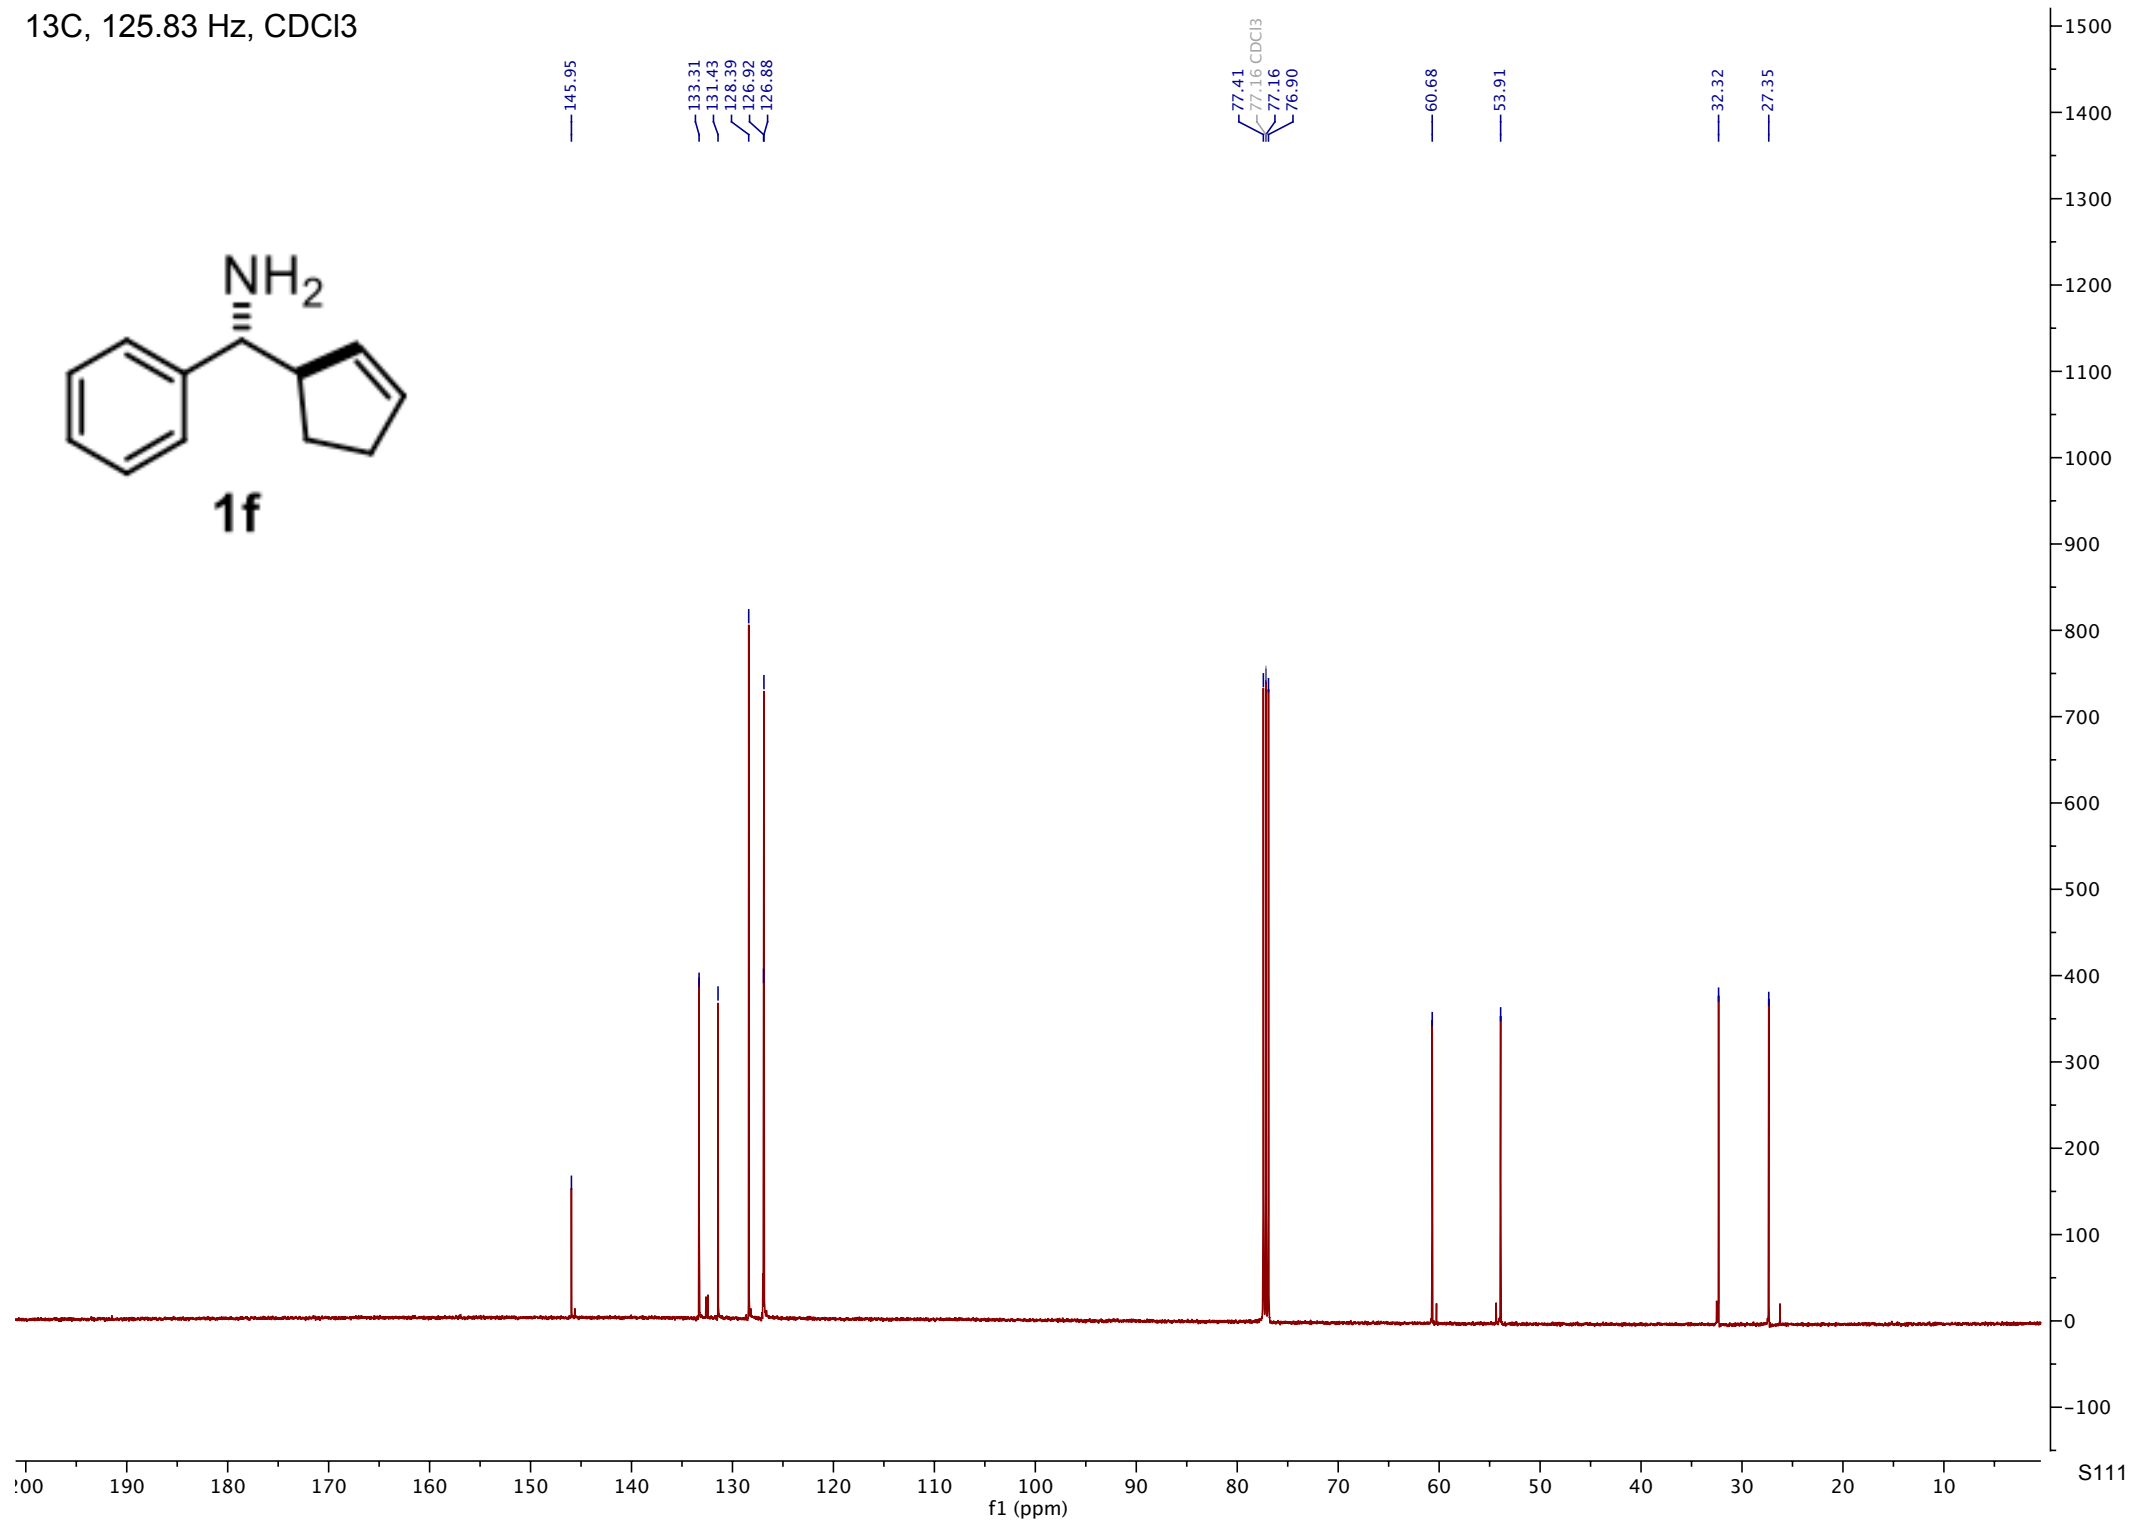





$^{13}\text{C}$ , 125.83 Hz,  $\text{CDCl}_3$

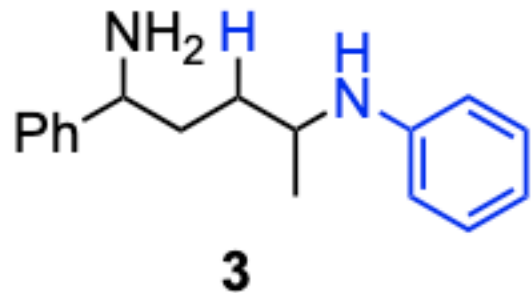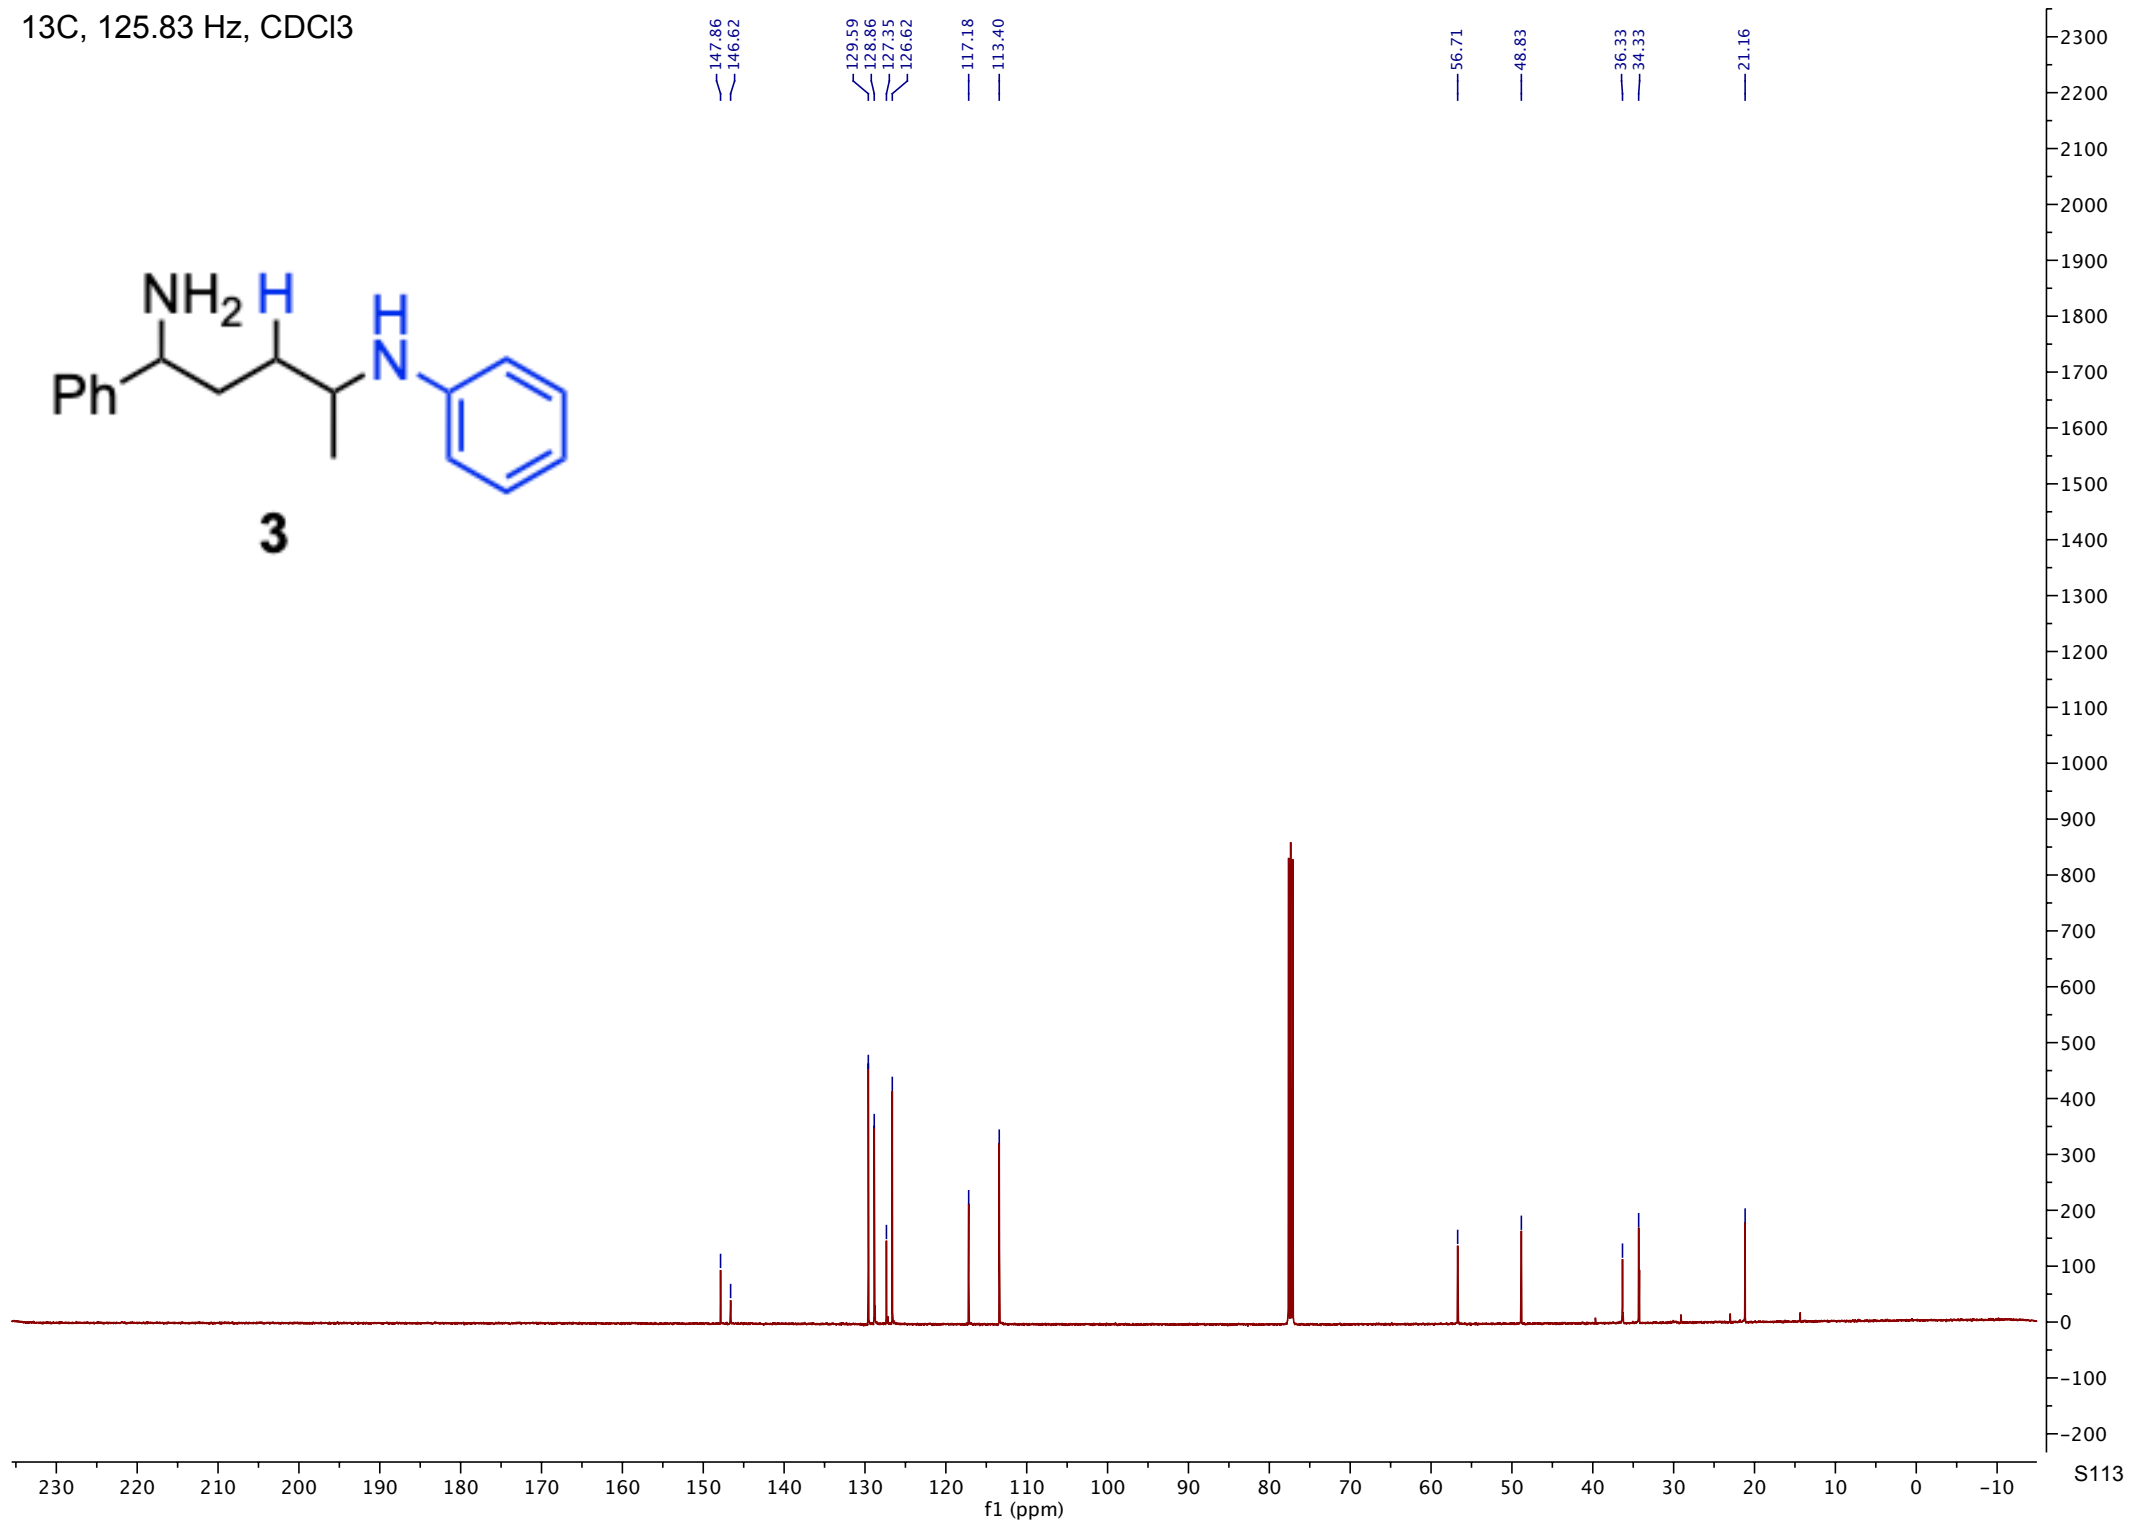

<sup>1</sup>H, 500.35 MHz, CDCl<sub>3</sub>

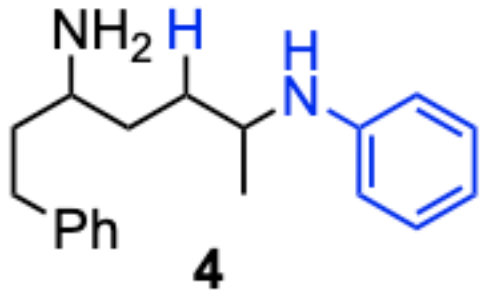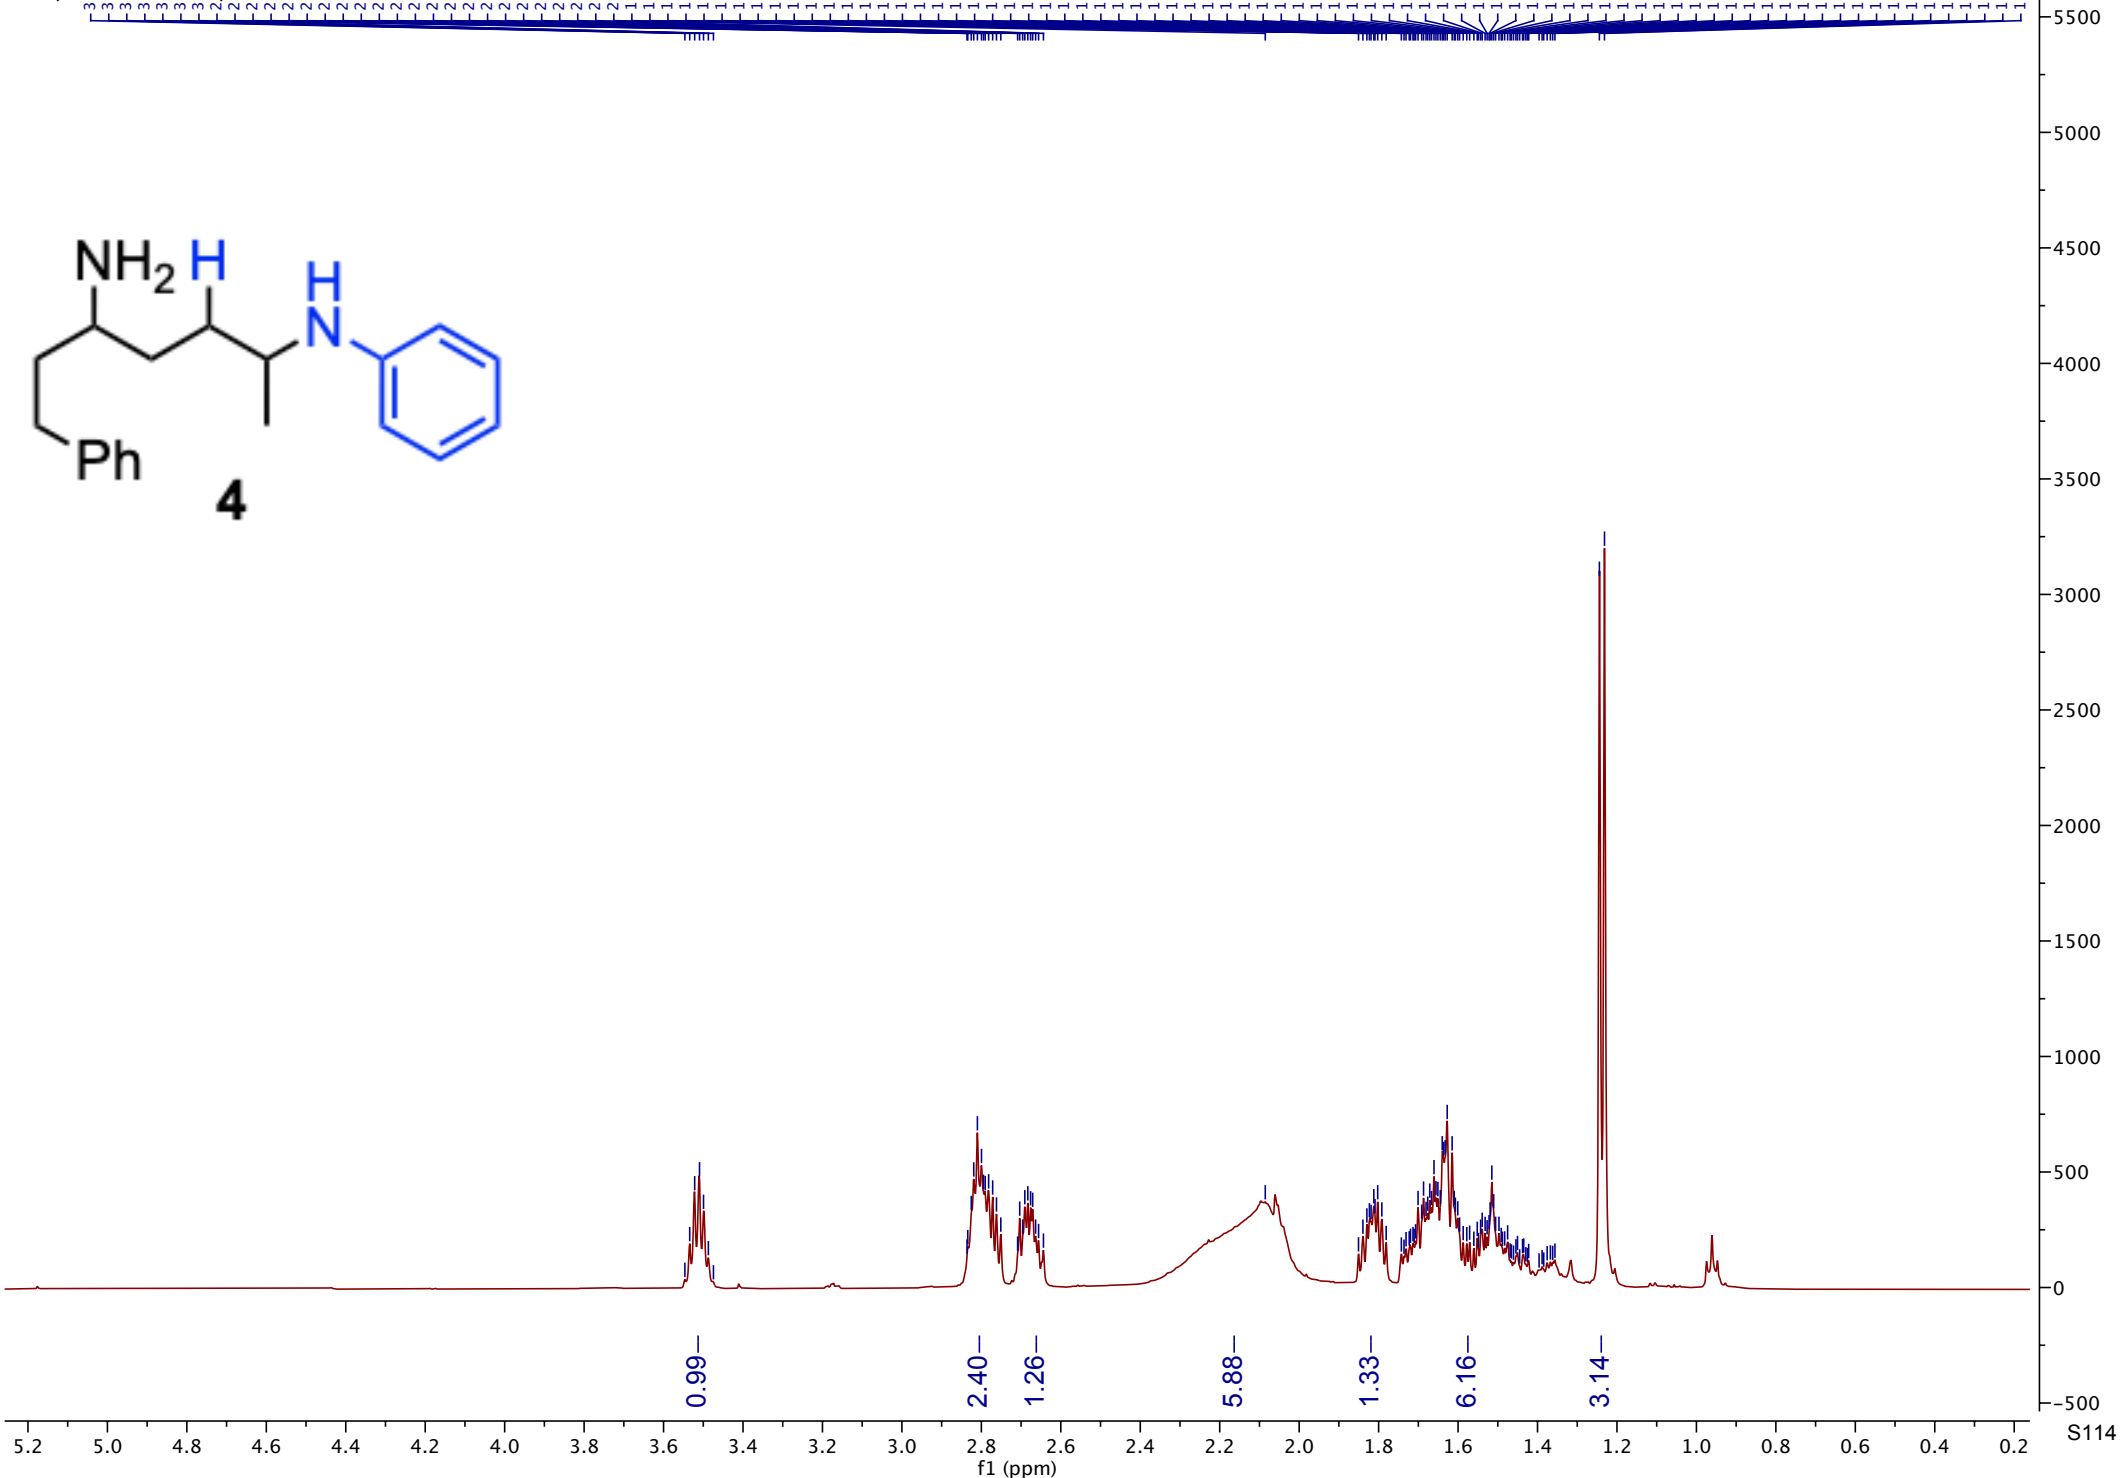

$^{13}\text{C}$ , 125.83 Hz,  $\text{CDCl}_3$

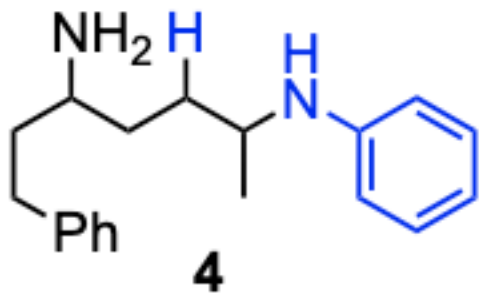

147.93

142.48

129.65

128.74

128.68

126.15

117.24

113.44

51.30

48.95

40.08

34.61

33.89

32.86

21.31

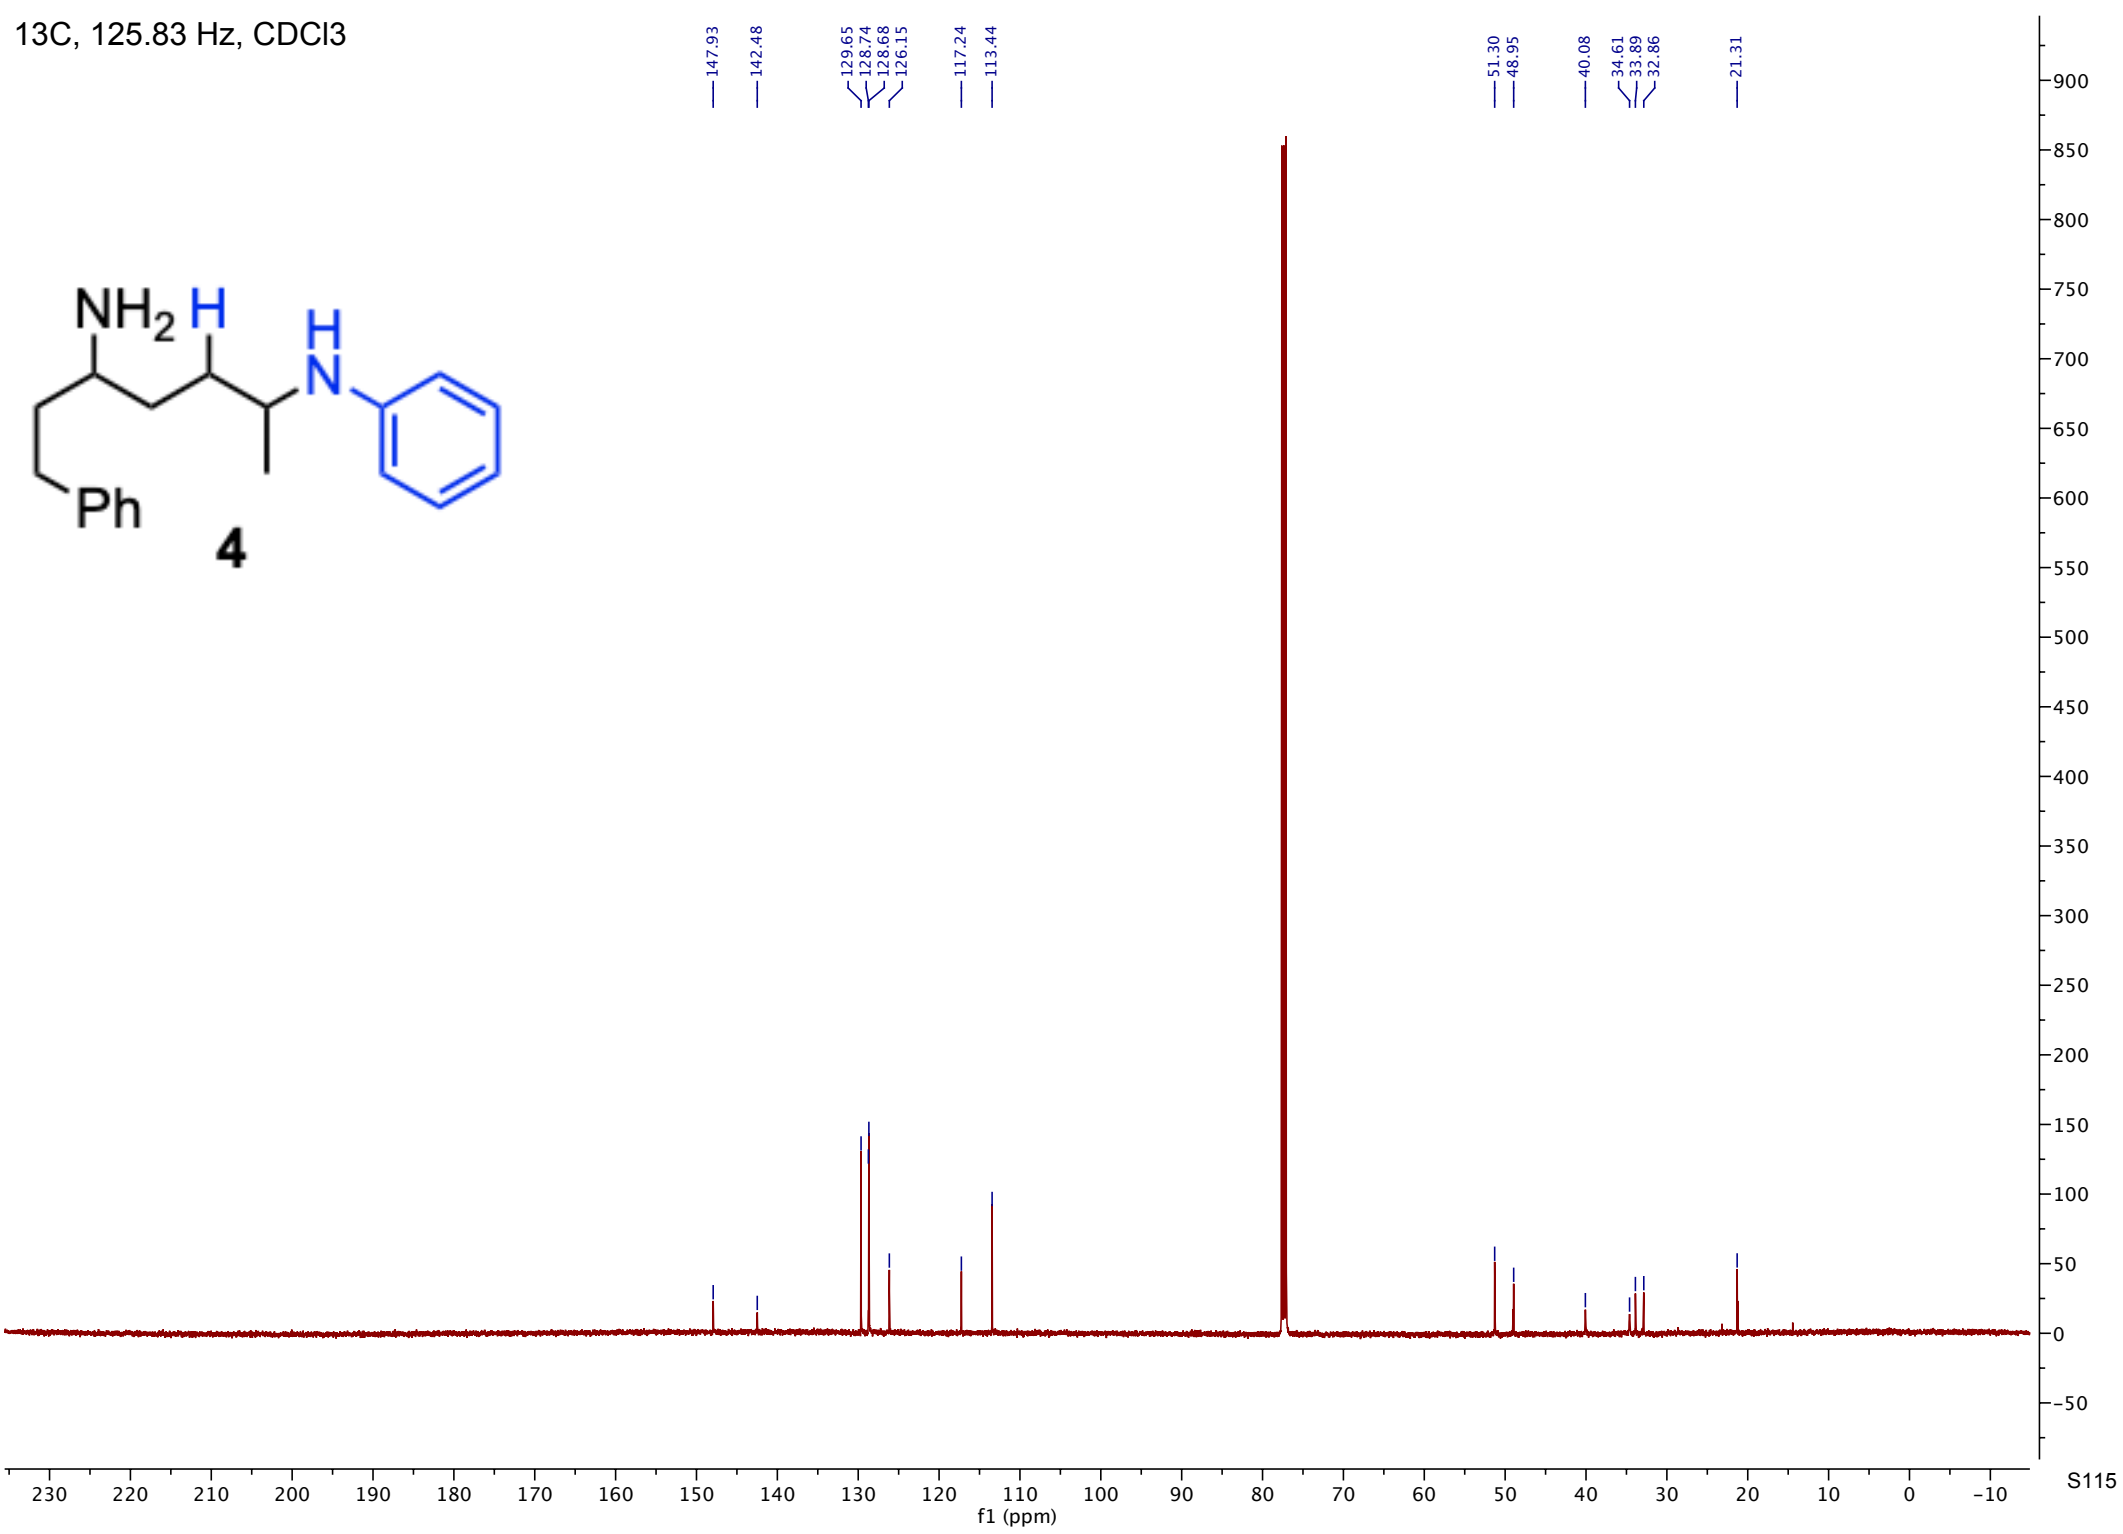

1H, 500.35 Hz, CDCl3

7.30  
7.29  
7.28  
7.27  
7.26  
7.26  
7.24  
7.23  
7.22  
7.21  
7.19  
7.18  
7.17  
7.16  
6.45  
6.44  
6.43  
6.42  
6.42  
3.42  
3.41  
3.40  
3.38  
2.75  
2.74  
2.74  
2.73  
2.72  
2.72  
2.71  
2.70  
2.65  
2.63  
2.63  
2.62  
2.61  
2.61  
2.60  
2.60  
1.77  
1.77  
1.76  
1.76  
1.75  
1.75  
1.74  
1.74  
1.73  
1.72  
1.64  
1.63  
1.63  
1.63  
1.62  
1.62  
1.61  
1.61  
1.60  
1.60  
1.59  
1.59  
1.58  
1.58  
1.57  
1.57  
1.56  
1.56  
1.56  
1.55  
1.55  
1.54  
1.54  
1.53  
1.53  
1.52  
1.52  
1.51  
1.51  
1.51  
1.50  
1.50  
1.49  
1.49  
1.48  
1.48  
1.48  
1.47  
1.47  
1.46  
1.46  
1.43  
1.43  
1.41  
1.41  
1.40  
1.39  
1.39  
1.38  
1.38  
1.38  
1.37  
1.37  
1.36  
1.35  
1.35  
1.17  
1.17  
1.16

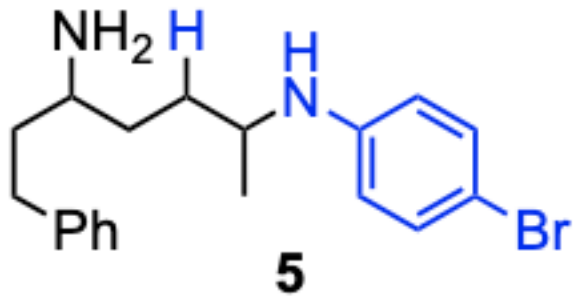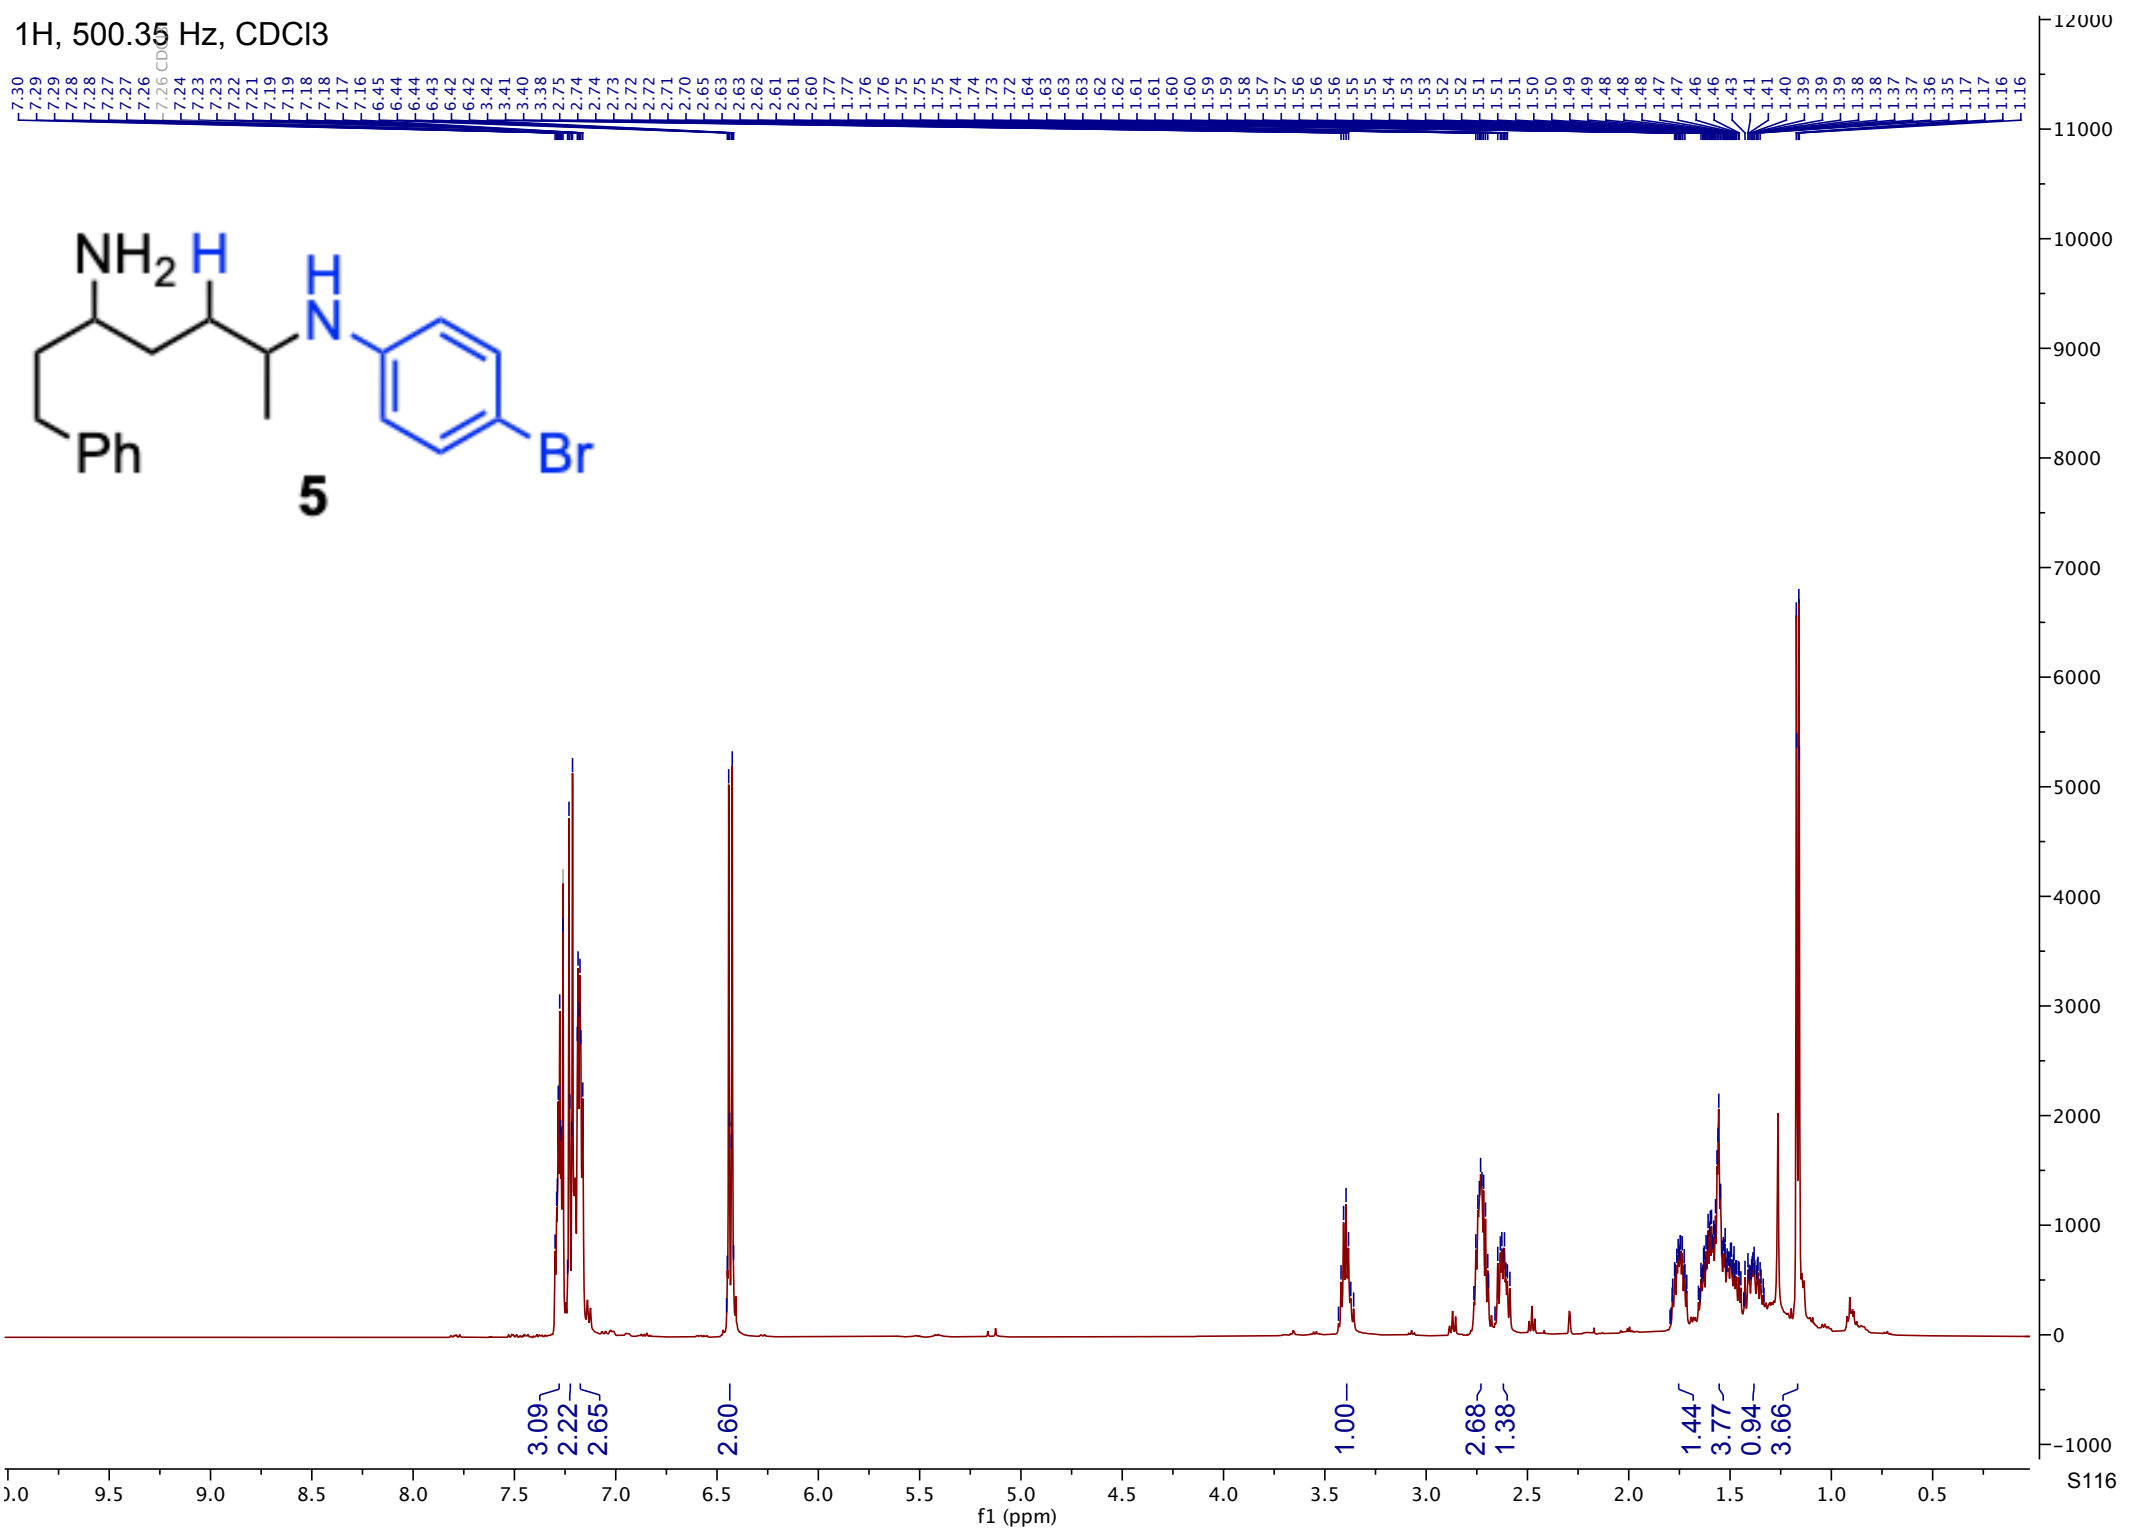

$^{13}\text{C}$ , 125.83 Hz,  $\text{CDCl}_3$

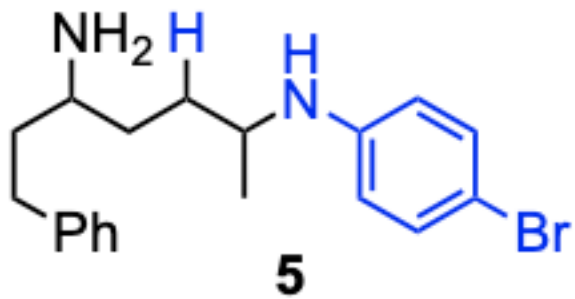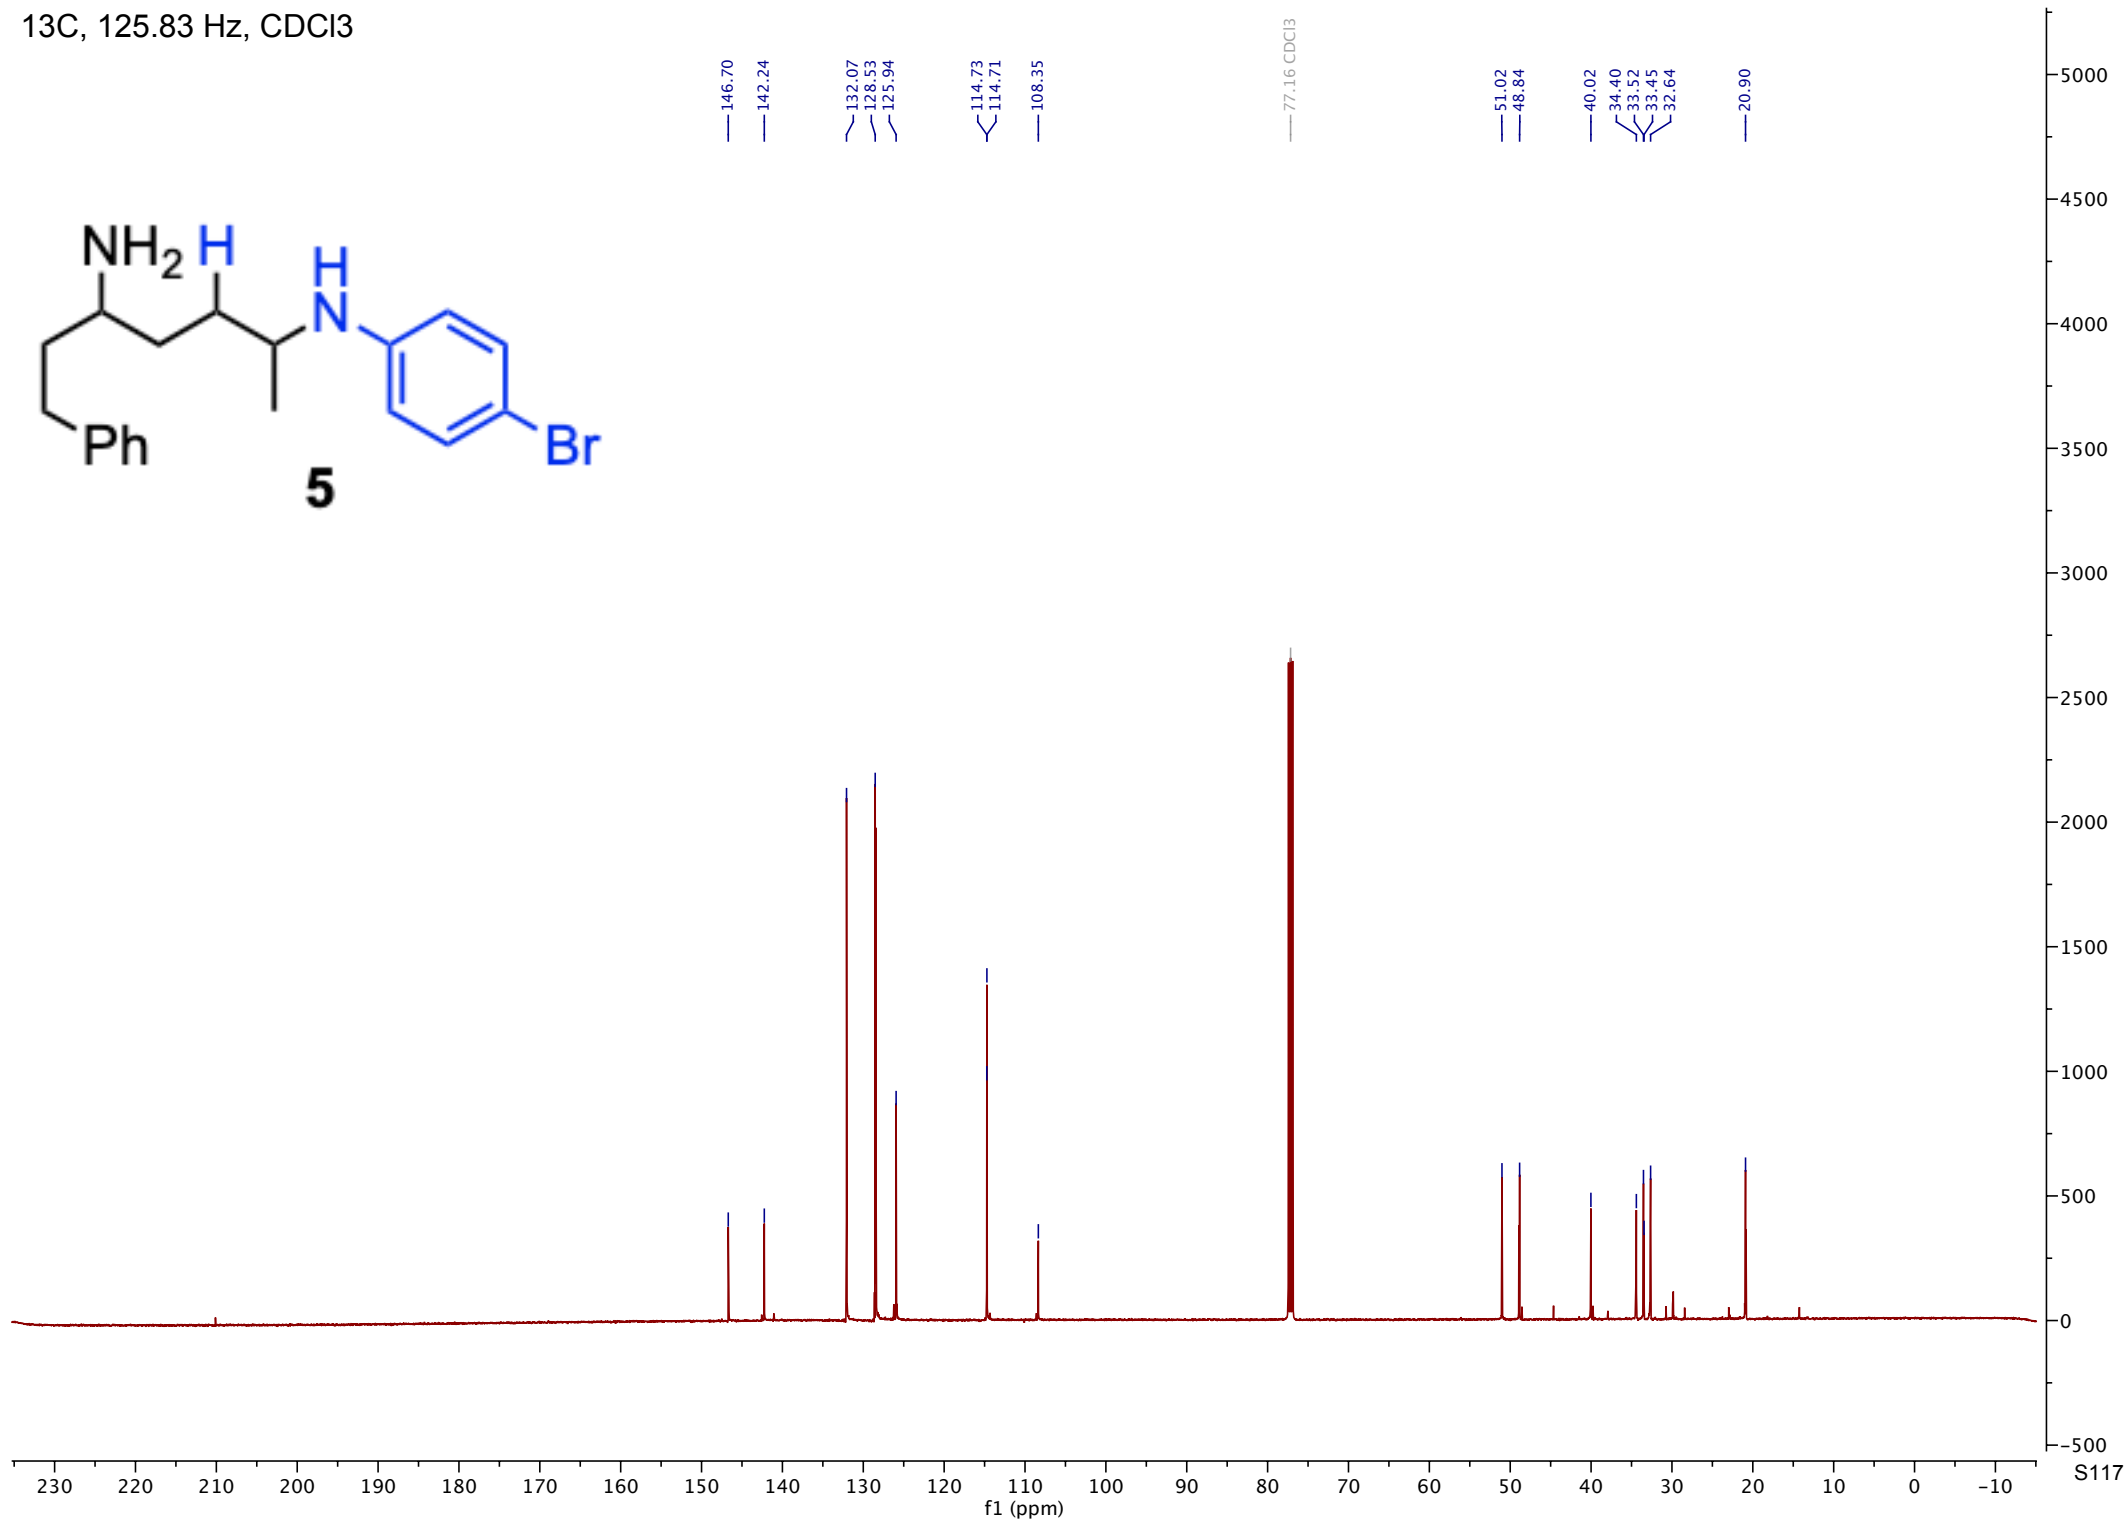

1H, 500.35 Hz, CDCl3

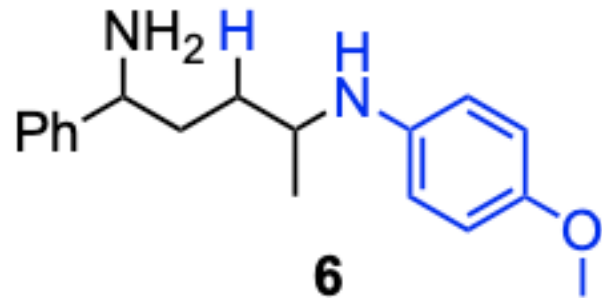

7.35  
7.33  
7.32  
7.31  
7.30  
7.28 CDCl3  
7.26  
7.26  
7.25  
7.24  
7.24  
7.23  
7.23  
6.76  
6.74  
6.51  
6.49

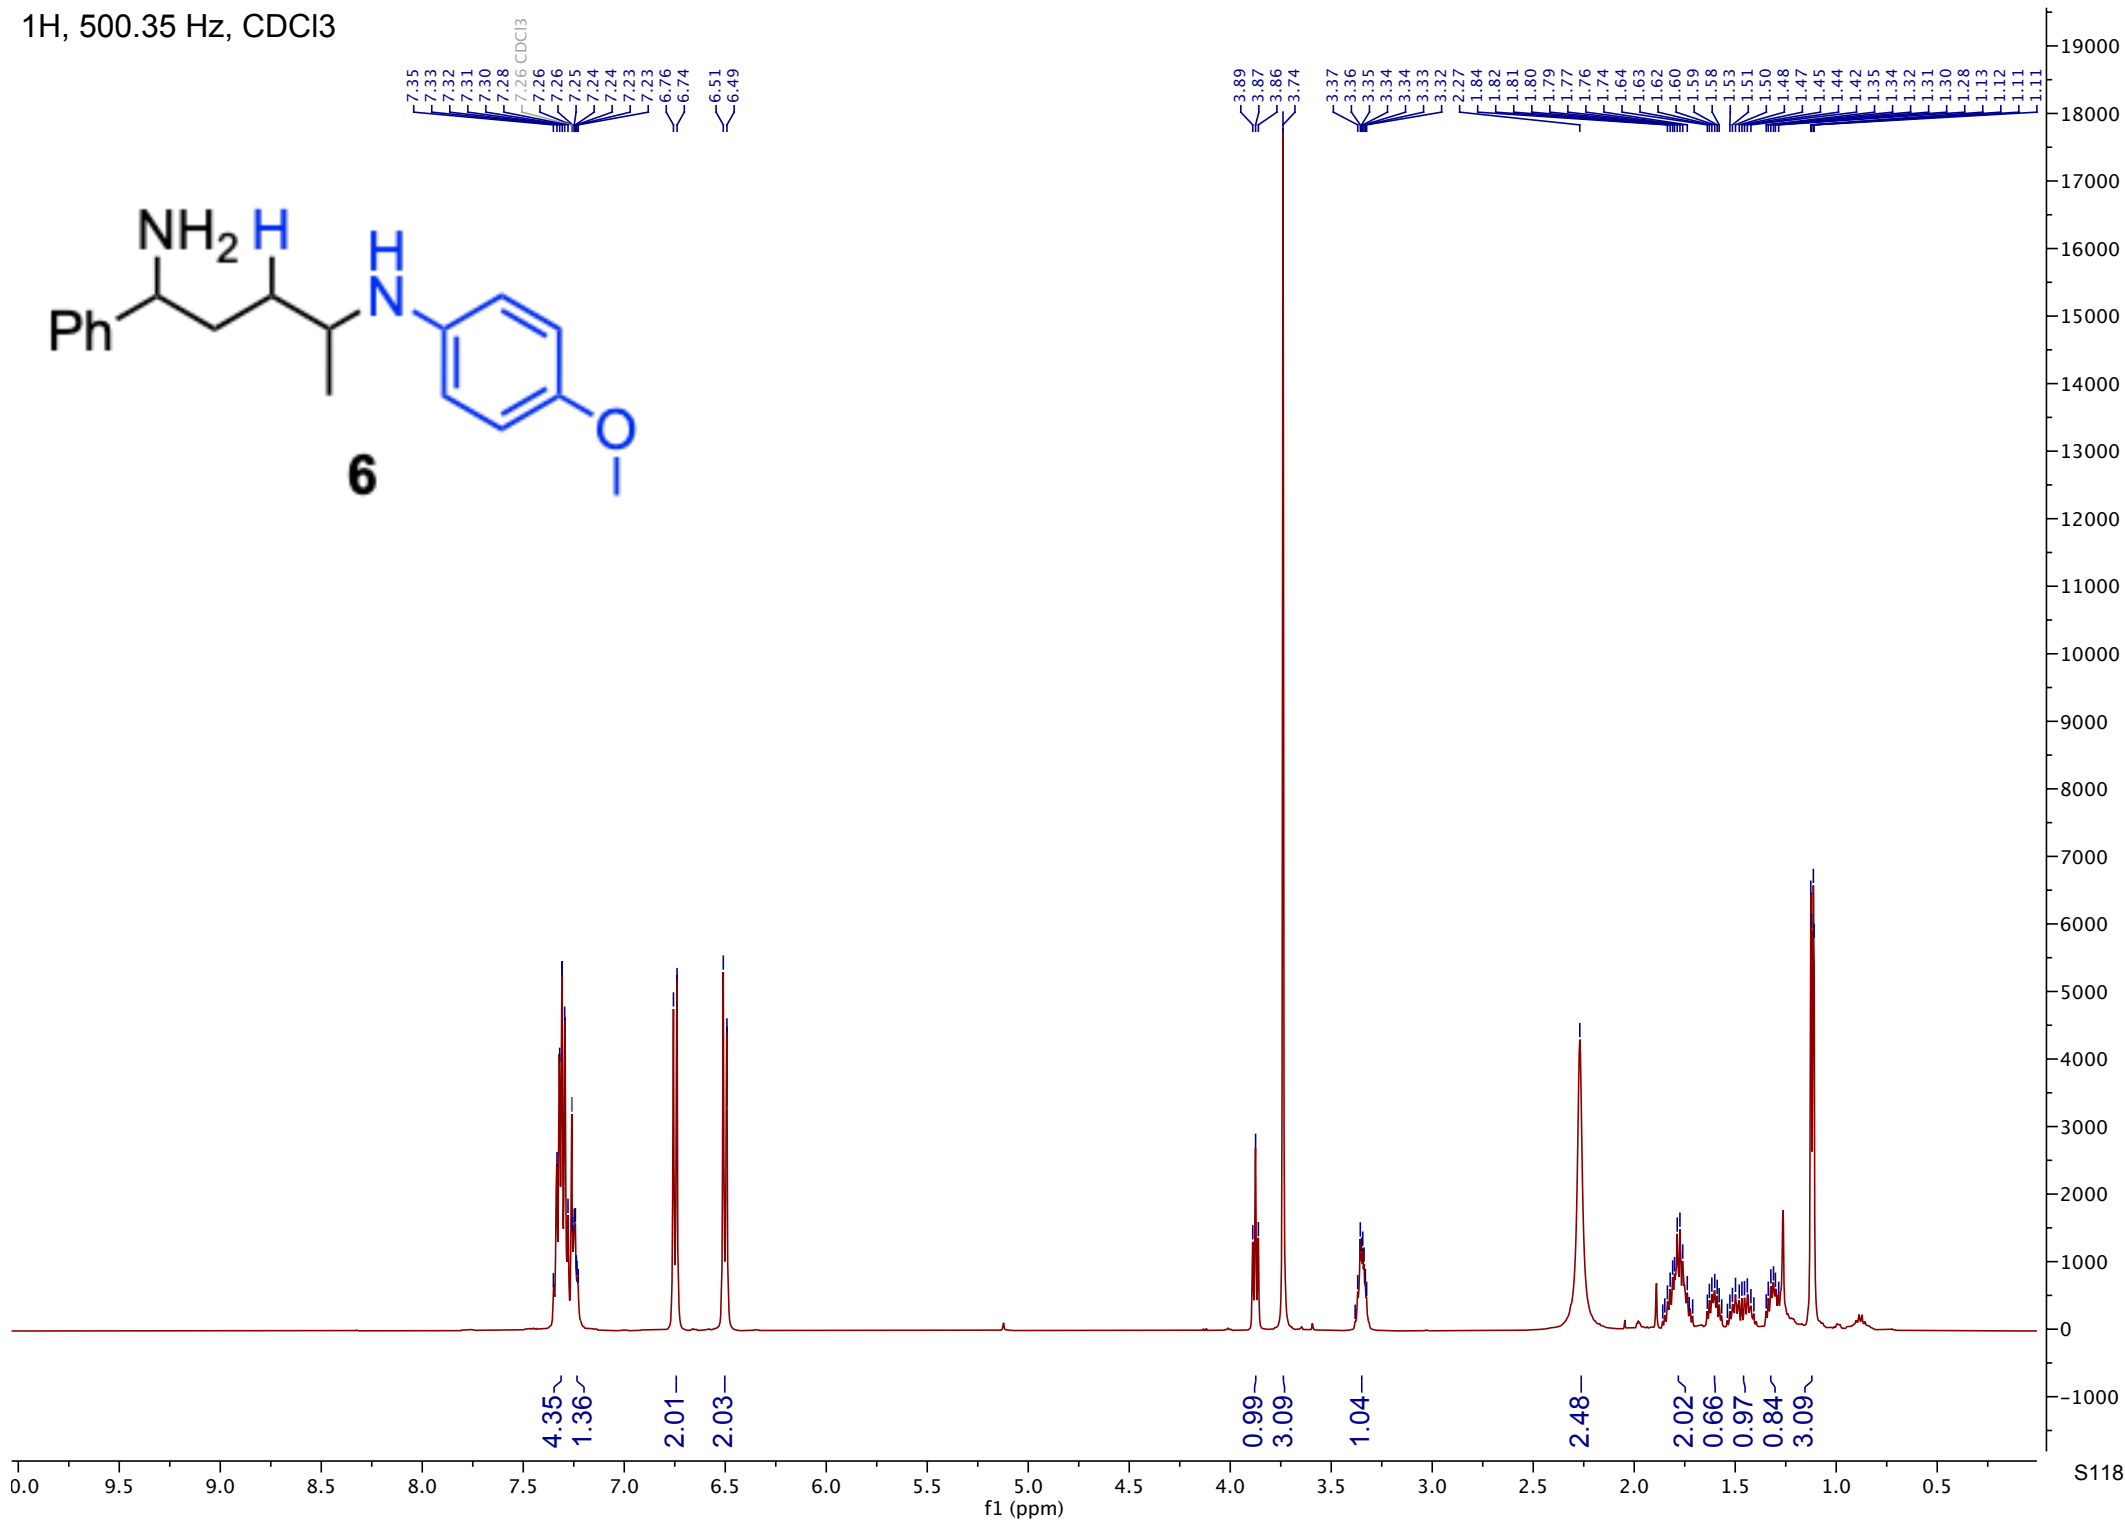

<sup>13</sup>C, 125.83 Hz, CDCl<sub>3</sub>

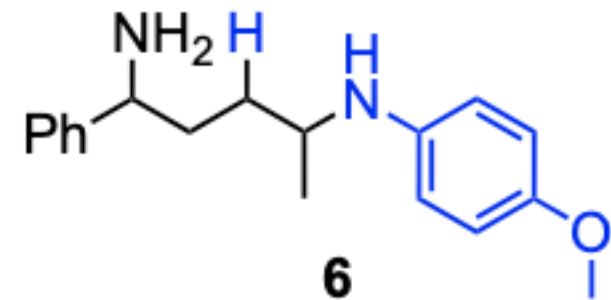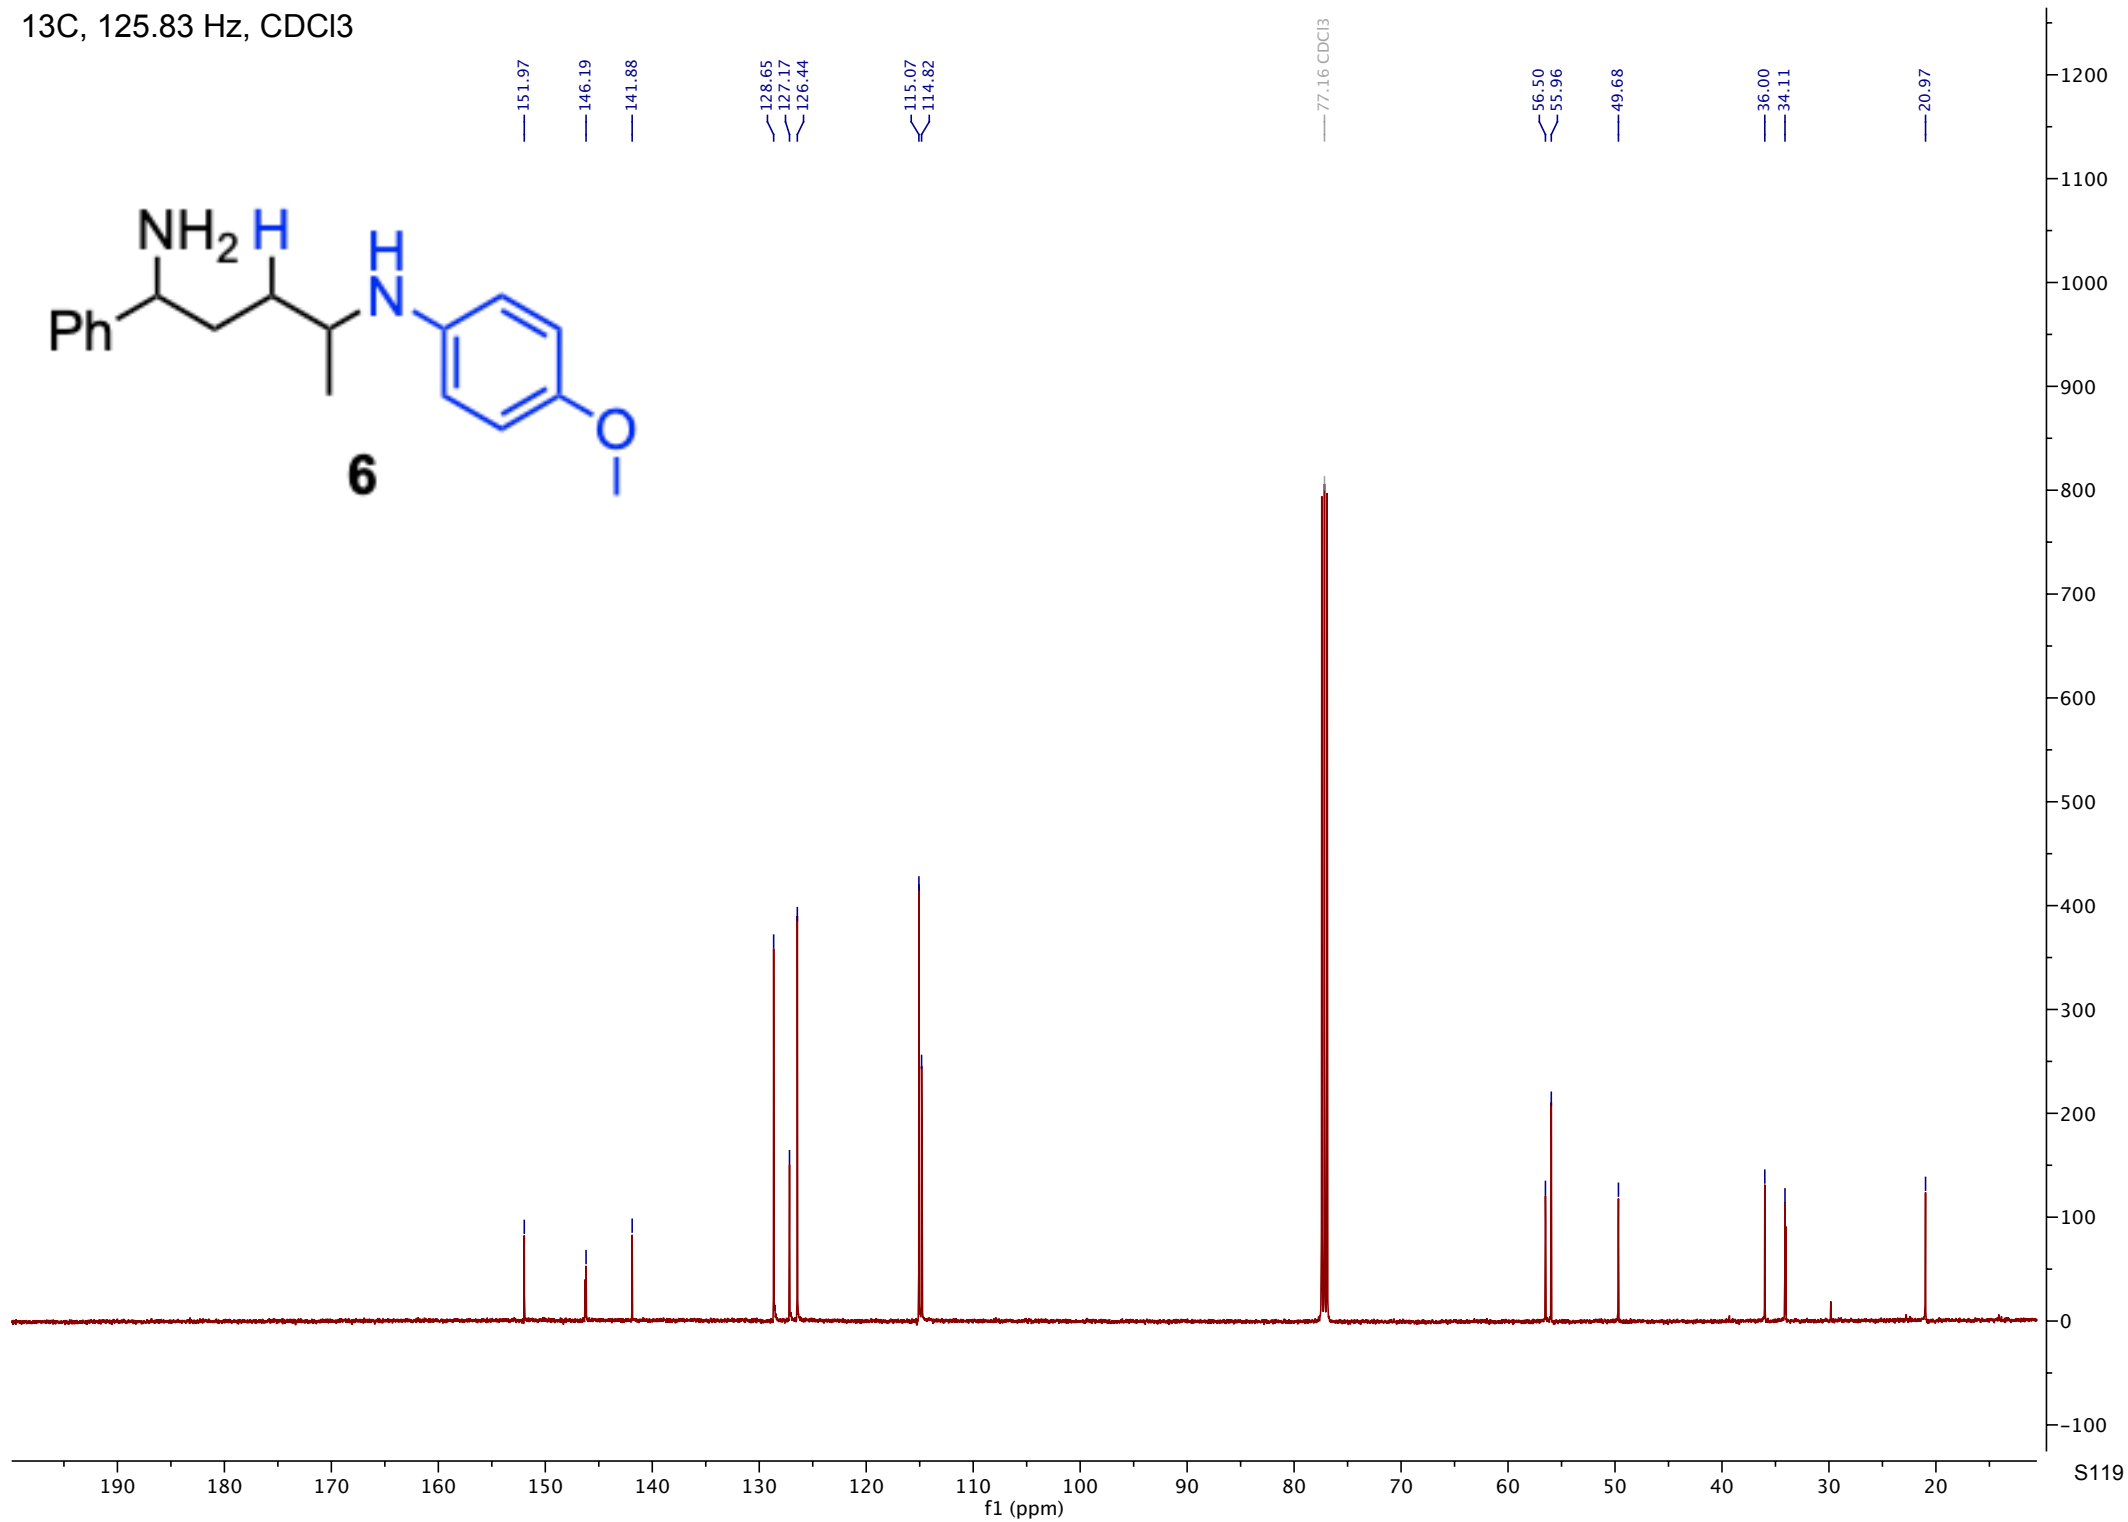

1H, 500.35 Hz, CDCl3

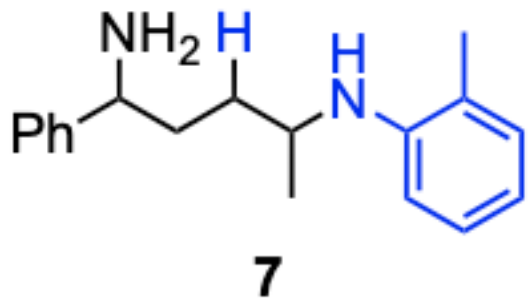

7.38  
7.36  
7.35  
7.34  
7.32  
7.31  
7.29  
7.28  
7.27  
7.26 CDCl3  
7.11  
7.10  
7.08  
7.06  
7.05  
6.64  
6.63  
6.61  
6.56  
6.54  
6.53

3.94  
3.93  
3.92  
3.91  
3.91  
3.55  
3.53  
3.52  
3.51  
3.51  
3.50  
3.50  
3.49  
3.48  
2.73  
2.11  
1.91  
1.91  
1.90  
1.89  
1.88  
1.87  
1.86  
1.85  
1.84  
1.83  
1.82  
1.82  
1.81  
1.80  
1.79  
1.78  
1.77  
1.72  
1.71  
1.70  
1.69  
1.68  
1.67  
1.66  
1.65  
1.61  
1.60  
1.59  
1.57  
1.56  
1.54  
1.53  
1.51  
1.50  
1.49  
1.48  
1.47  
1.41  
1.41  
1.39  
1.38  
1.36  
1.35  
1.34  
1.20  
1.20  
1.19  
1.18

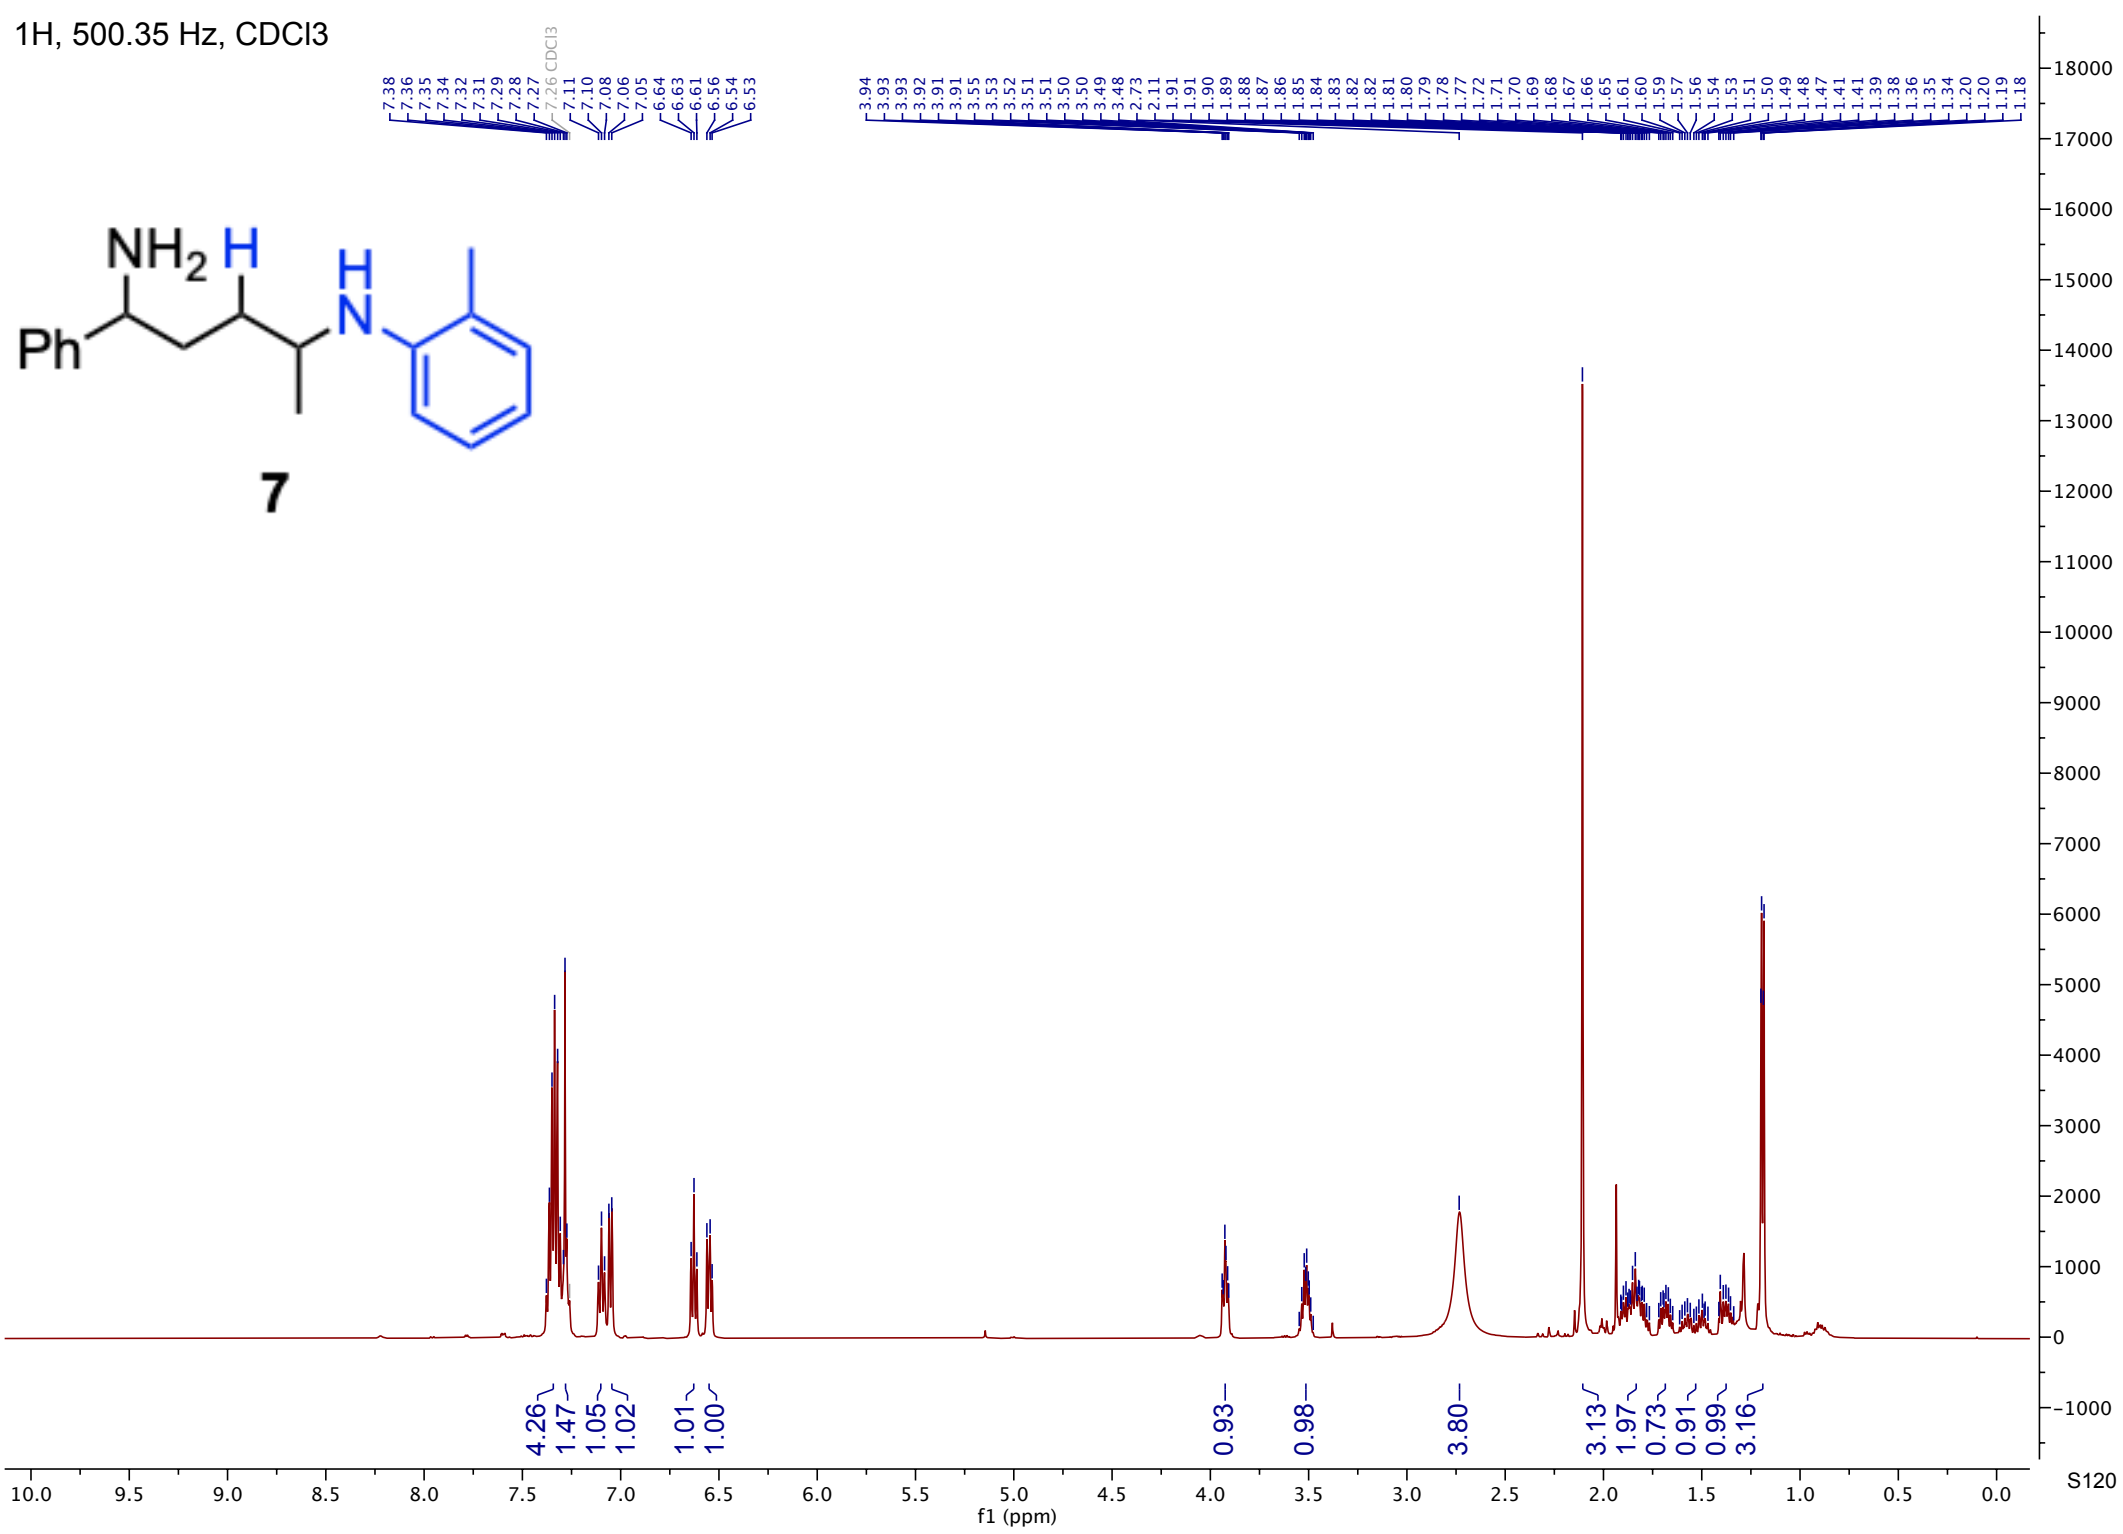

S120



$^{13}\text{C}$ , 125.83 Hz,  $\text{CDCl}_3$

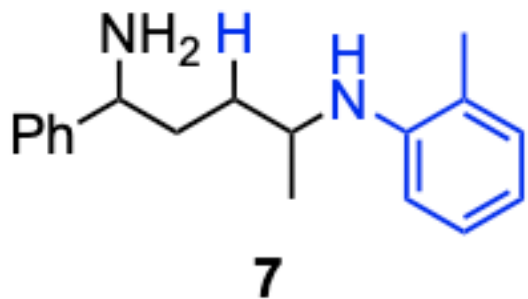

145.47

130.37

128.76

127.38

127.23

126.52

121.83

116.47

110.19

110.13

56.45

48.41

35.66

34.09

21.12

17.75

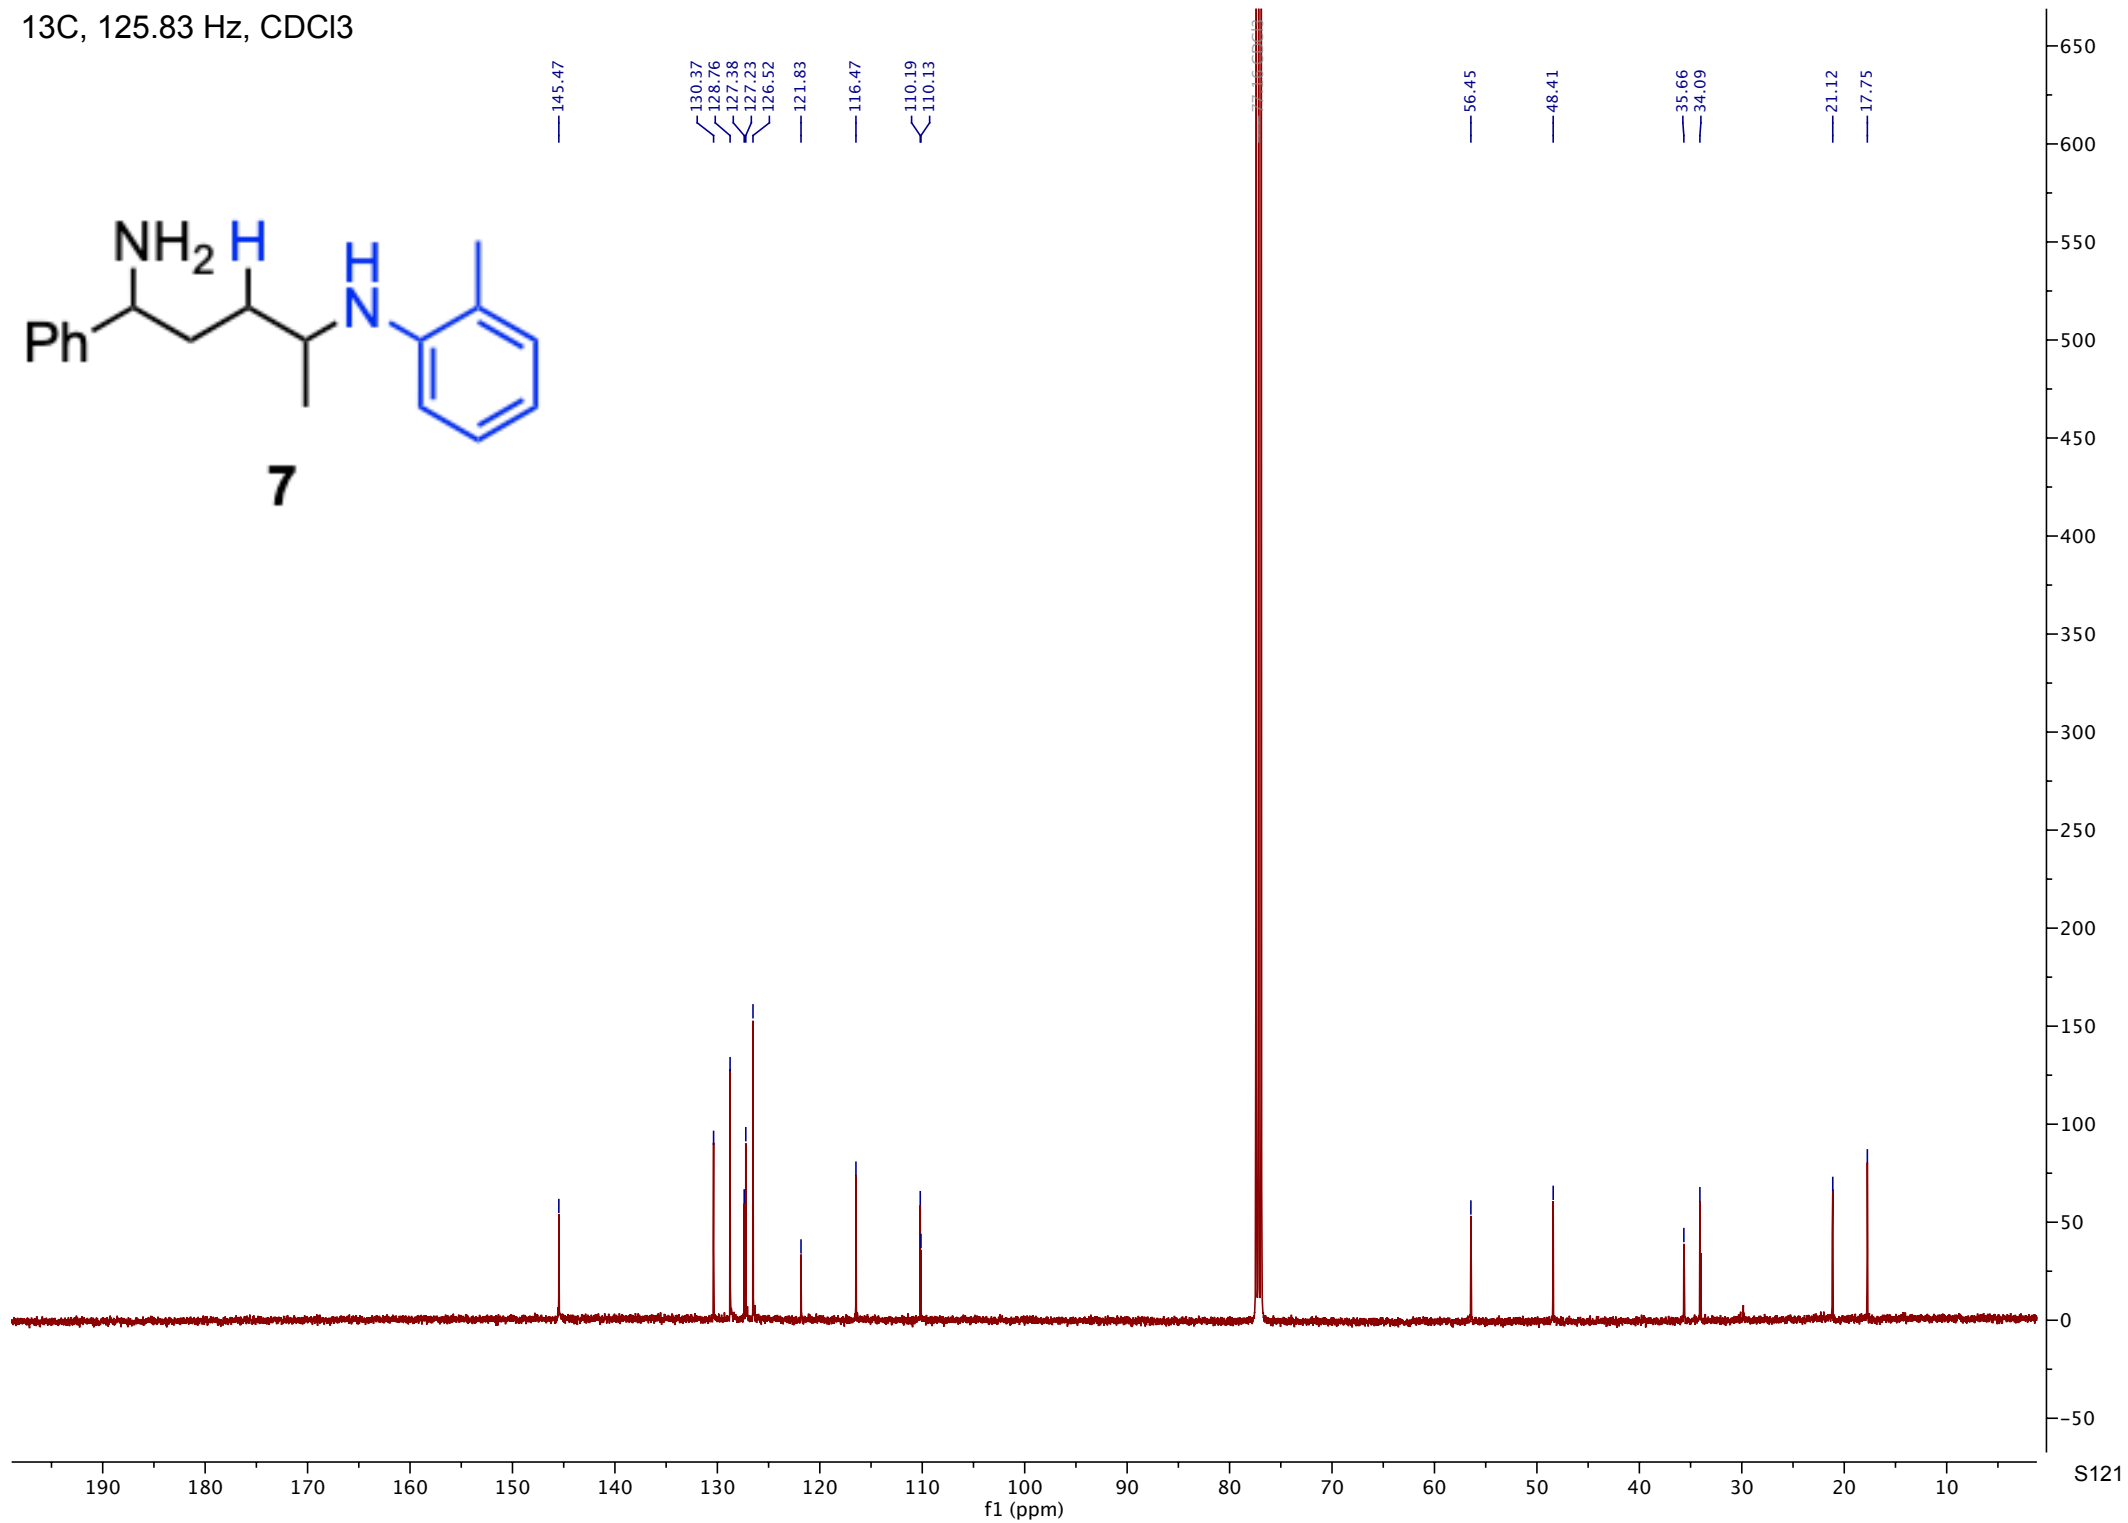

<sup>1</sup>H, 399.95 Hz, cdcl<sub>3</sub>

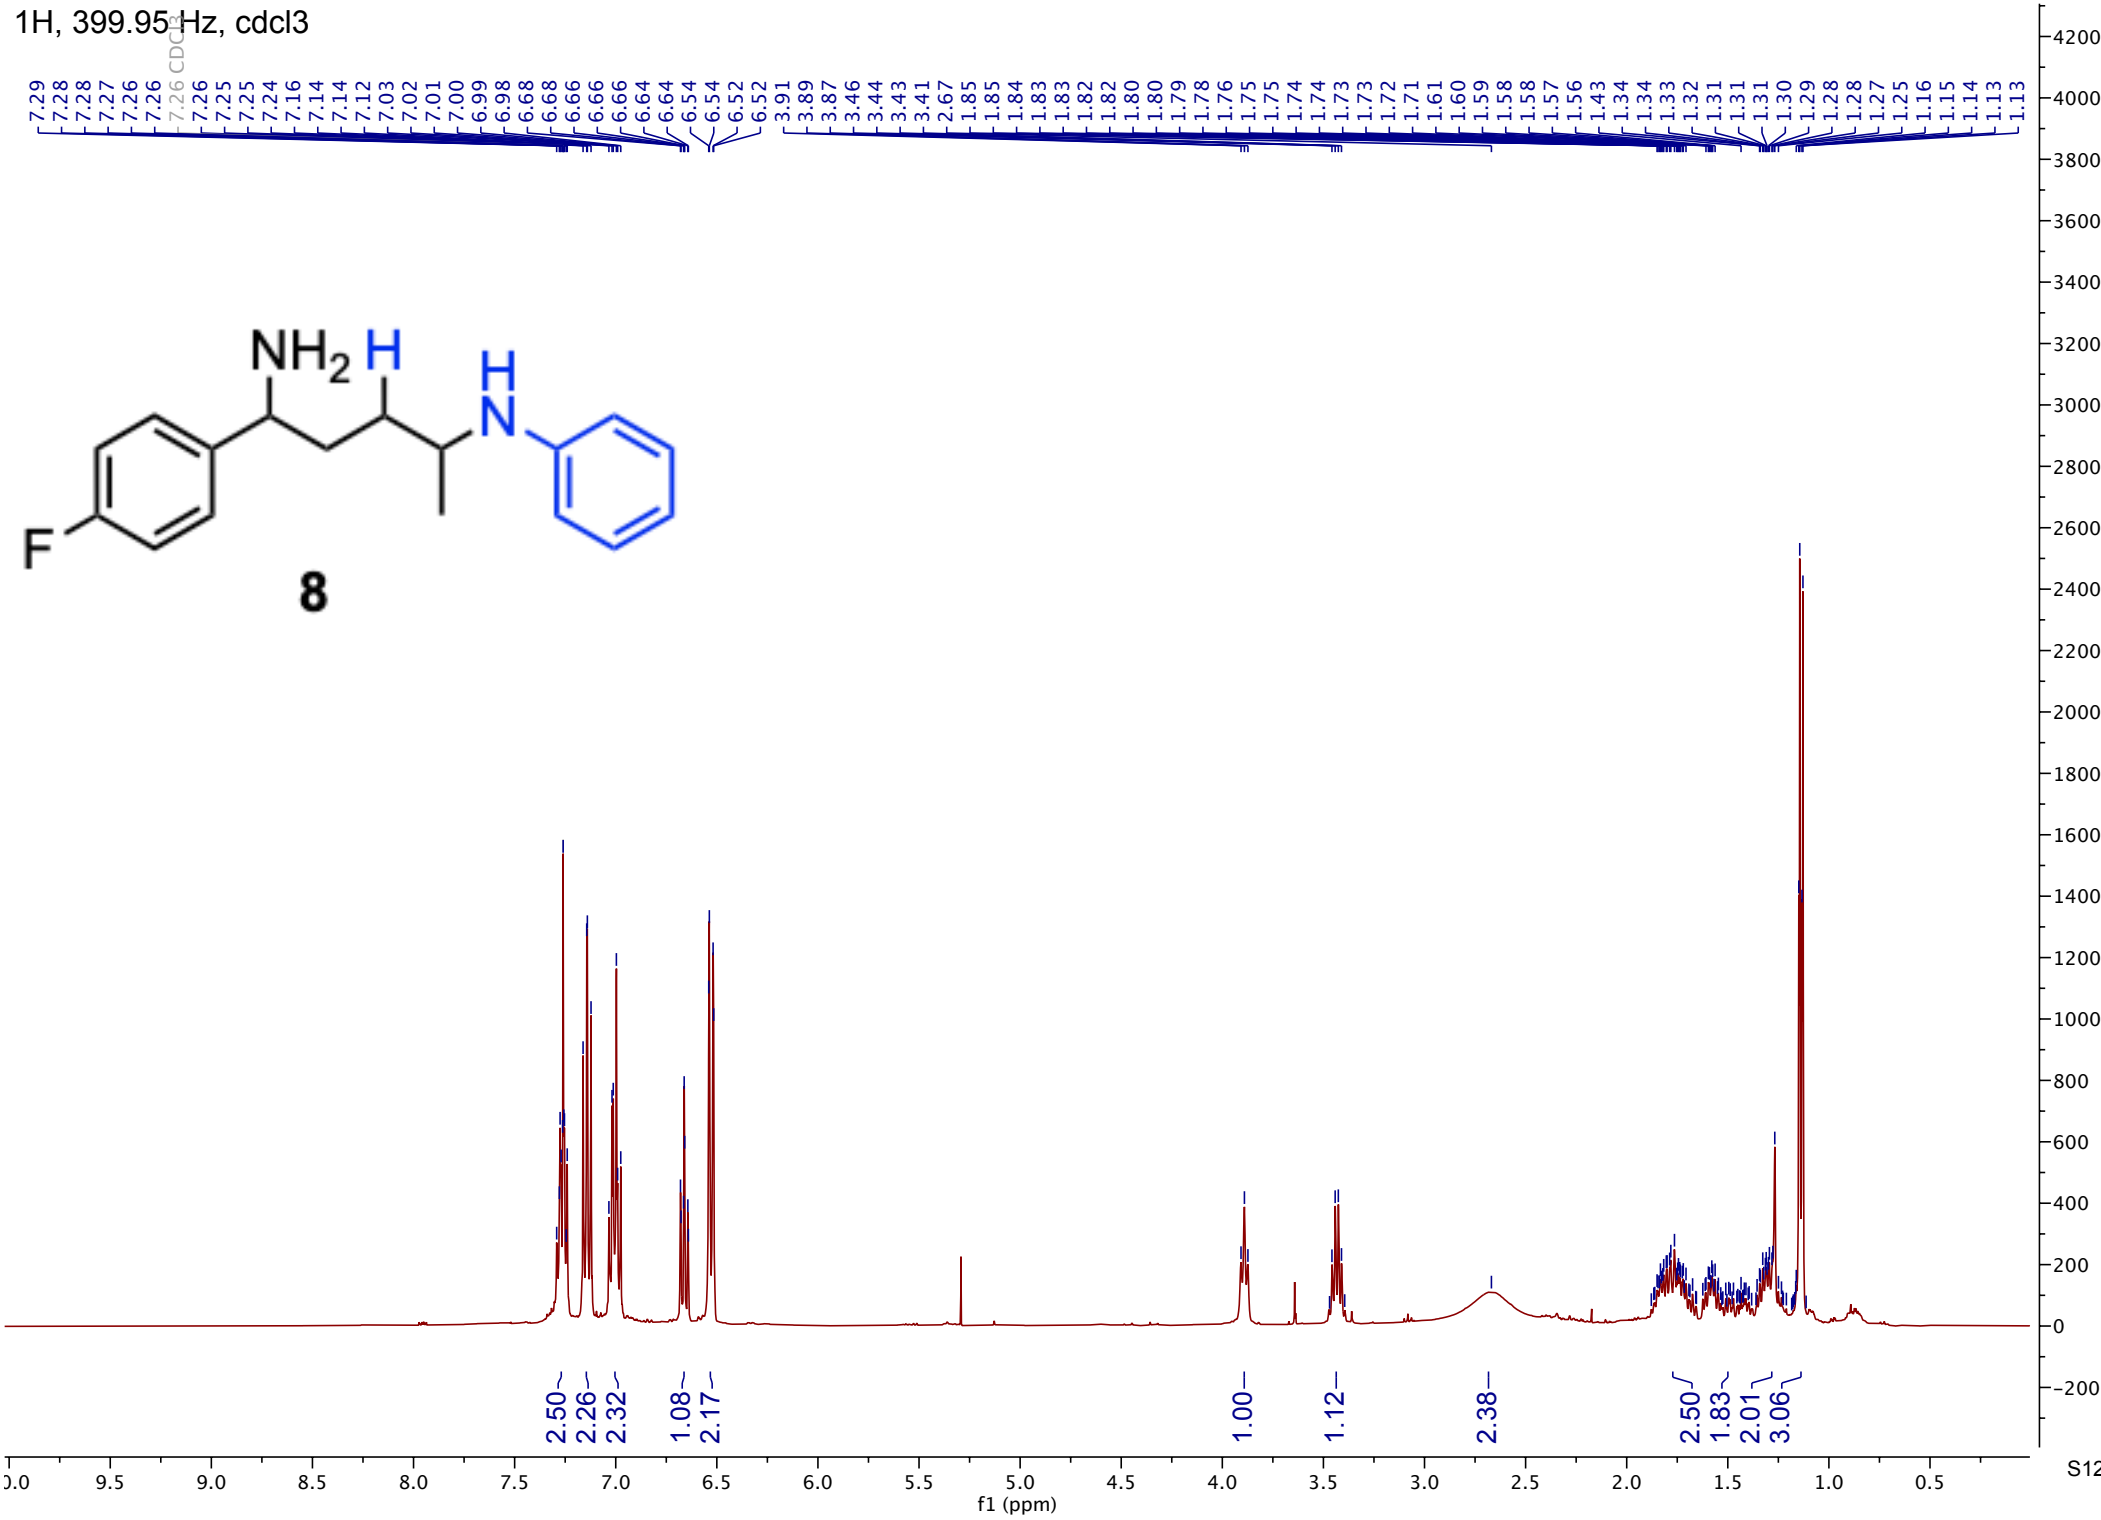

$^{13}\text{C}$ , 100.61 Hz,  $\text{CDCl}_3$

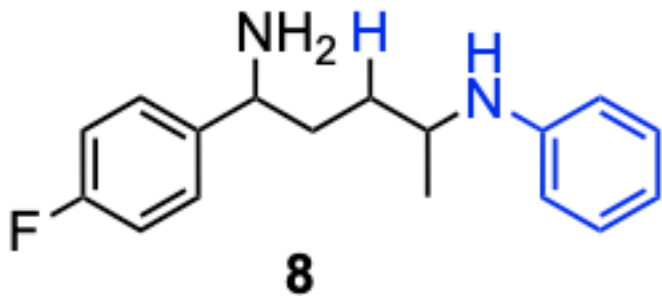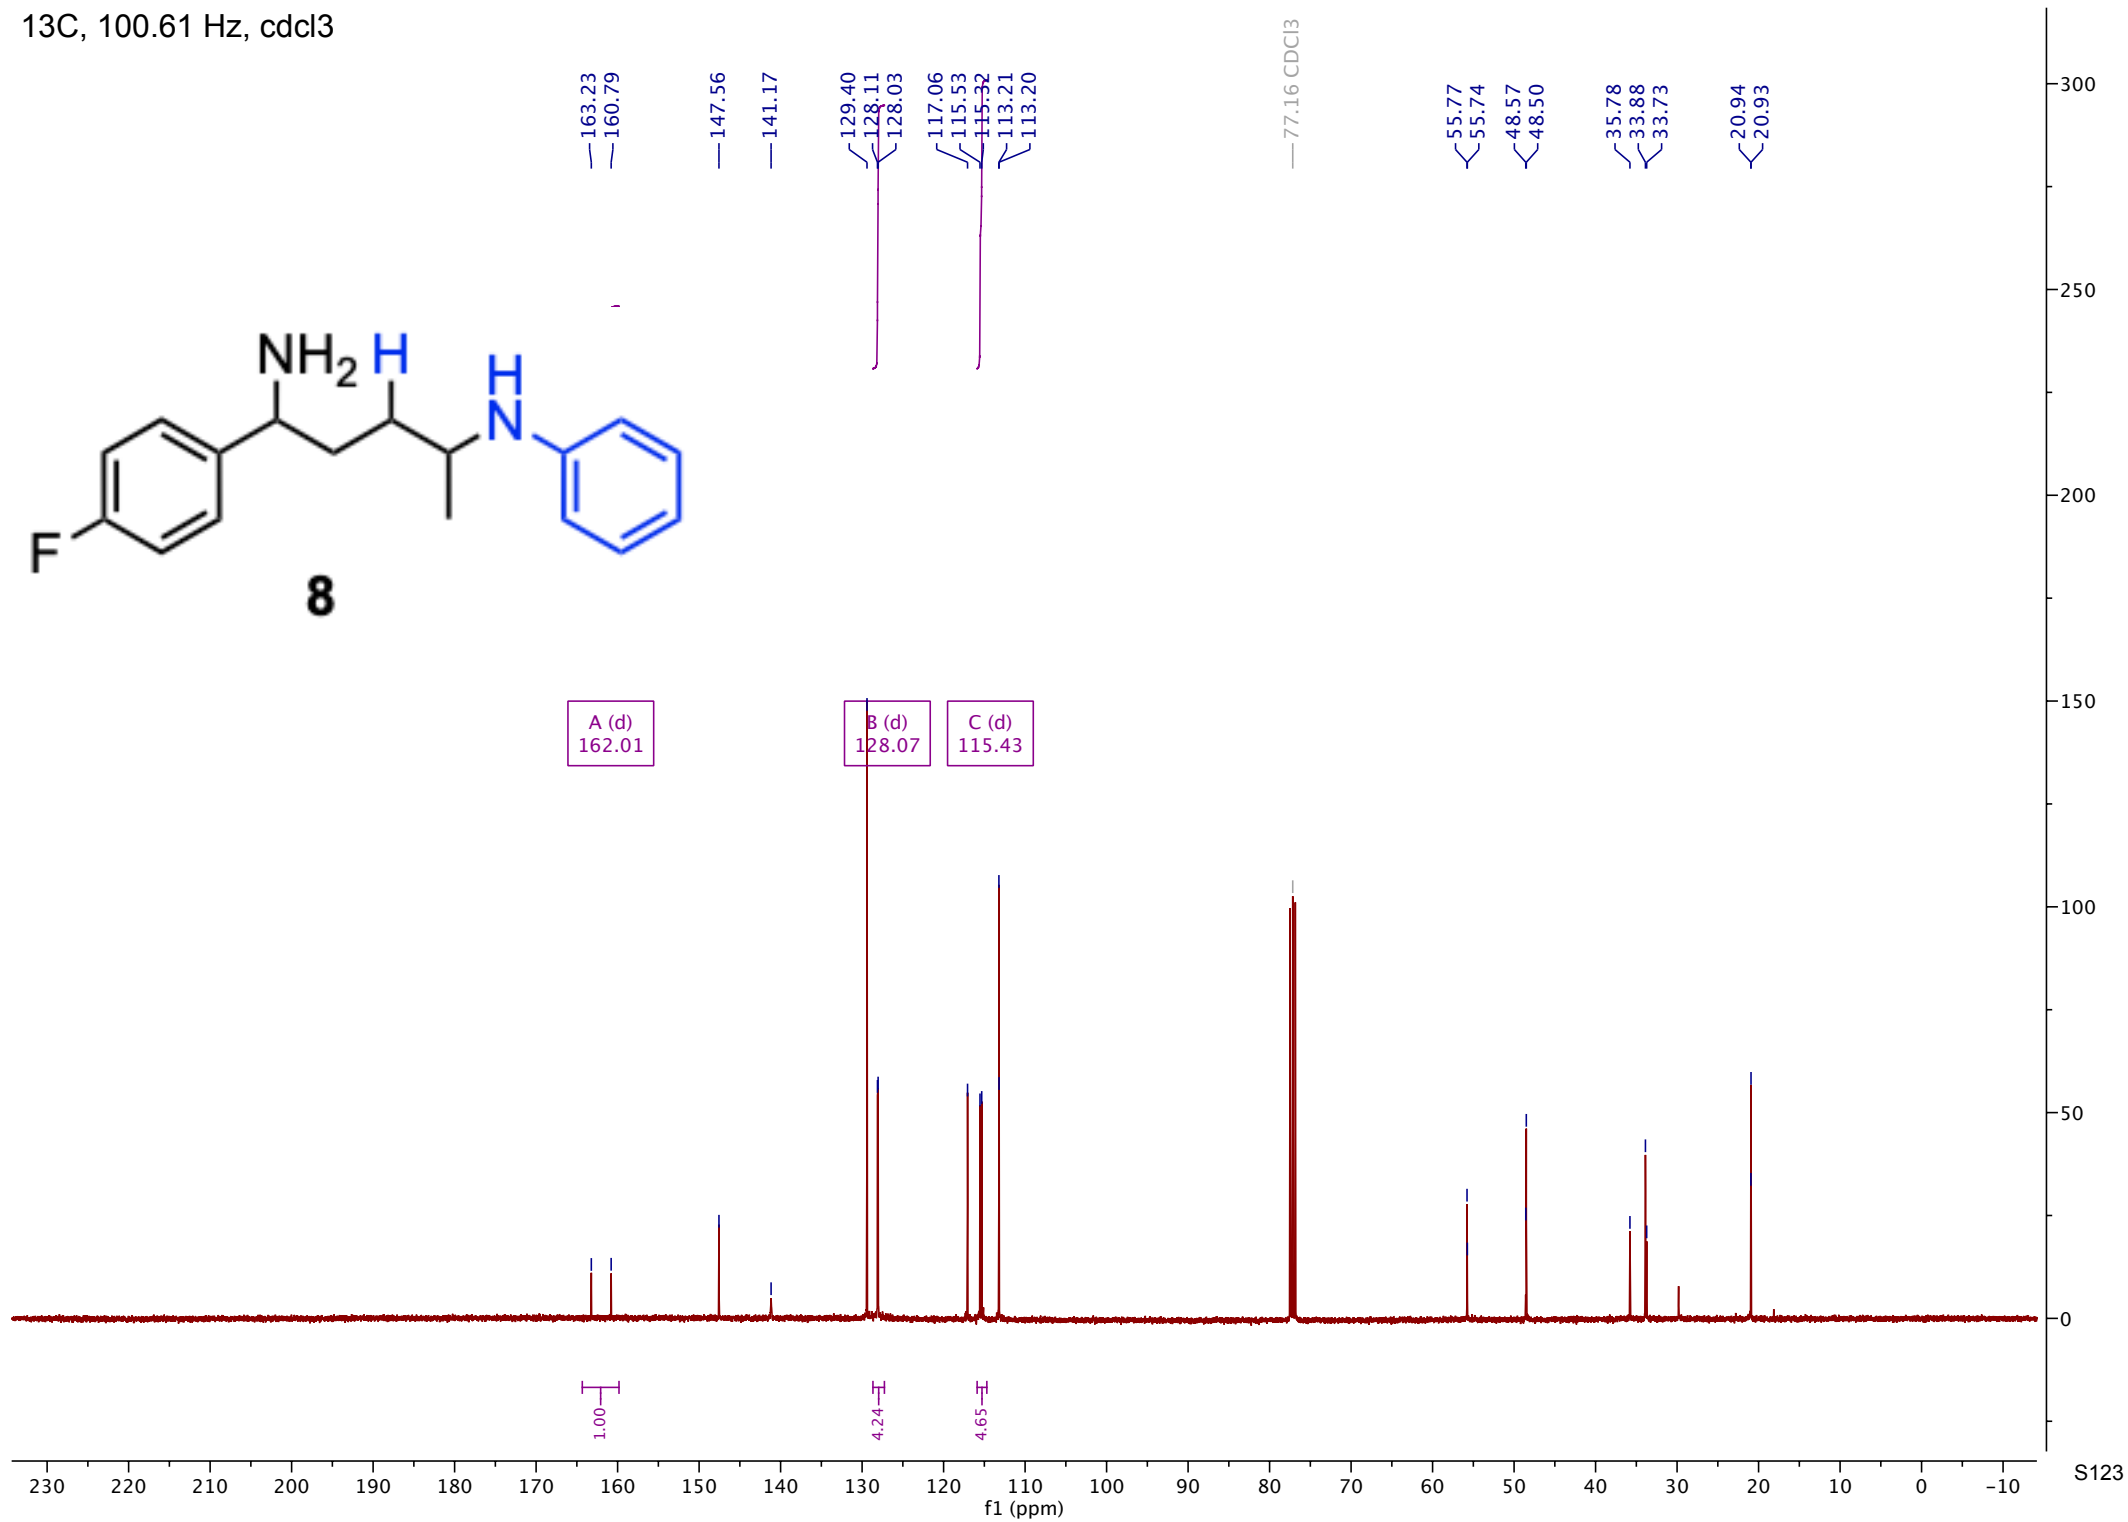

19F, 376.30 Hz, cdcl3

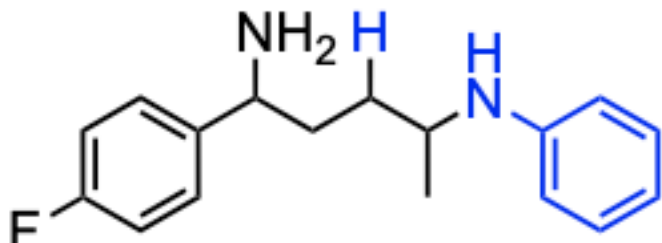

**8**

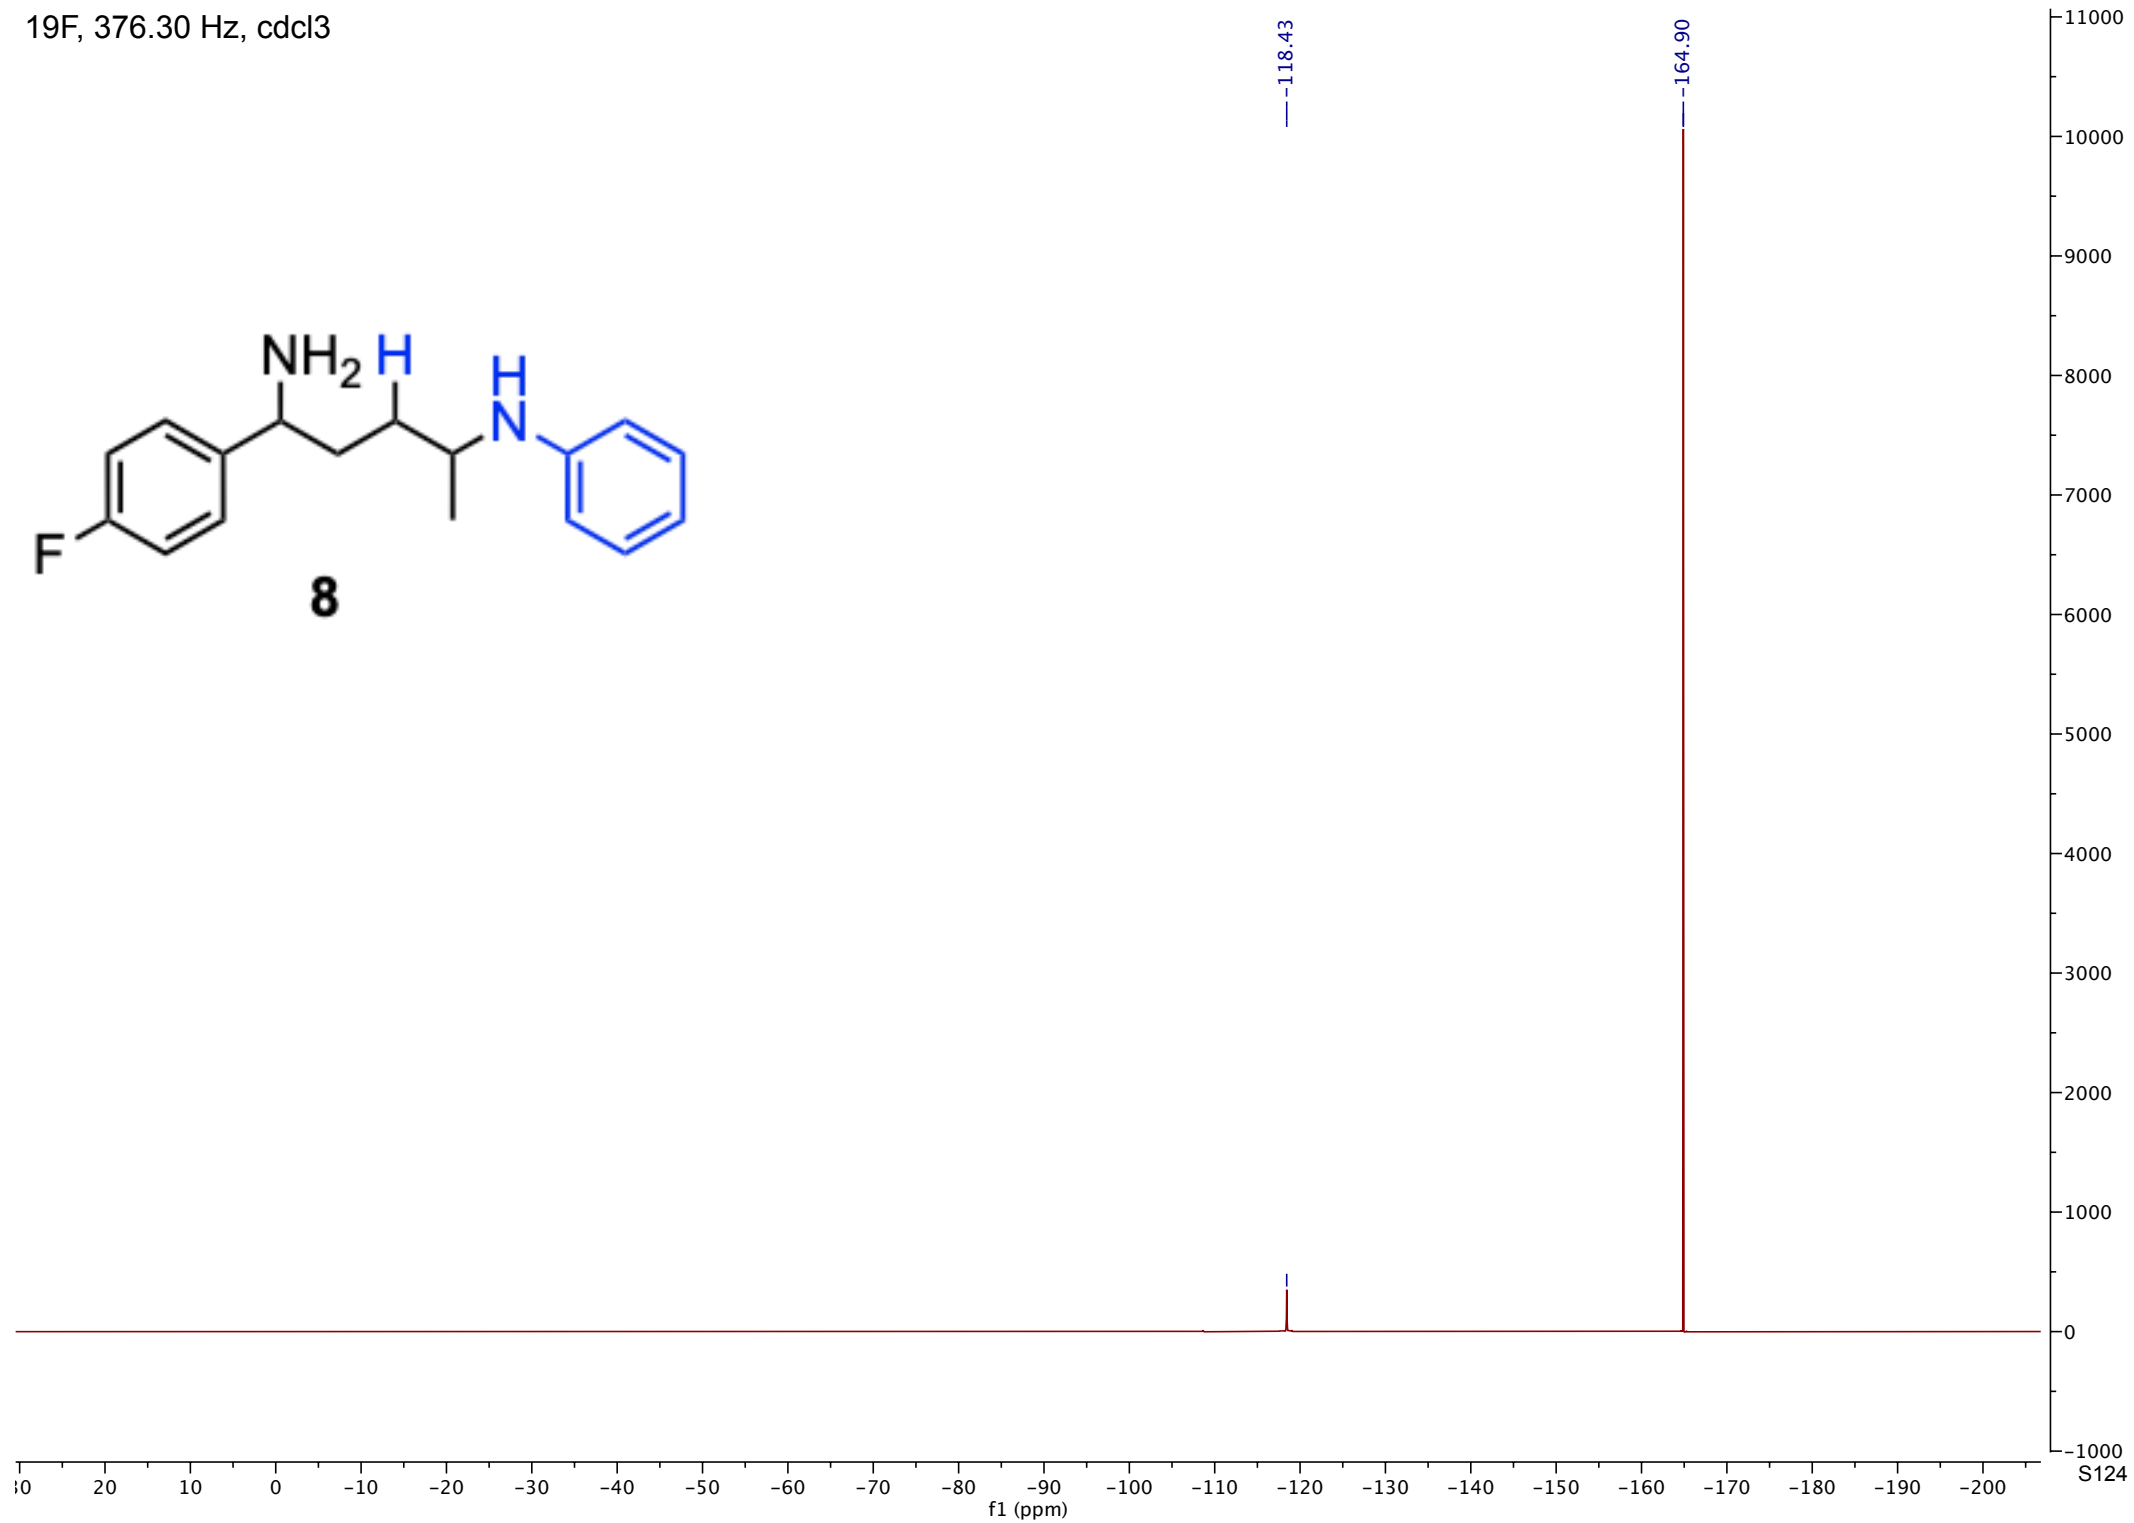

S124

<sup>1</sup>H, 500.35 Hz, CDCl<sub>3</sub>

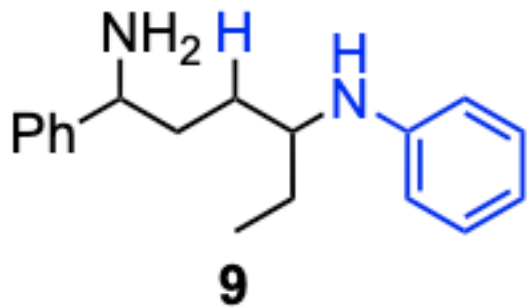

7.37  
7.35  
7.33  
7.32  
7.30  
7.28  
7.27  
7.26 CDCl<sub>3</sub>  
7.25  
7.16  
7.15  
7.13  
6.67  
6.65  
6.64  
6.55  
6.53

3.91  
3.90  
3.89  
3.31  
3.29  
3.28  
3.27  
3.26  
2.84  
1.89  
1.87  
1.87  
1.86  
1.85  
1.84  
1.83  
1.82  
1.82  
1.81  
1.80  
1.80  
1.79  
1.78  
1.77  
1.76  
1.75  
1.73  
1.72  
1.66  
1.65  
1.65  
1.63  
1.63  
1.62  
1.61  
1.60  
1.59  
1.57  
1.56  
1.55  
1.53  
1.52  
1.51  
1.51  
1.50  
1.49  
1.48  
1.48  
1.47  
1.46  
1.45  
1.44  
1.43  
0.91  
0.90  
0.89  
0.88  
0.87

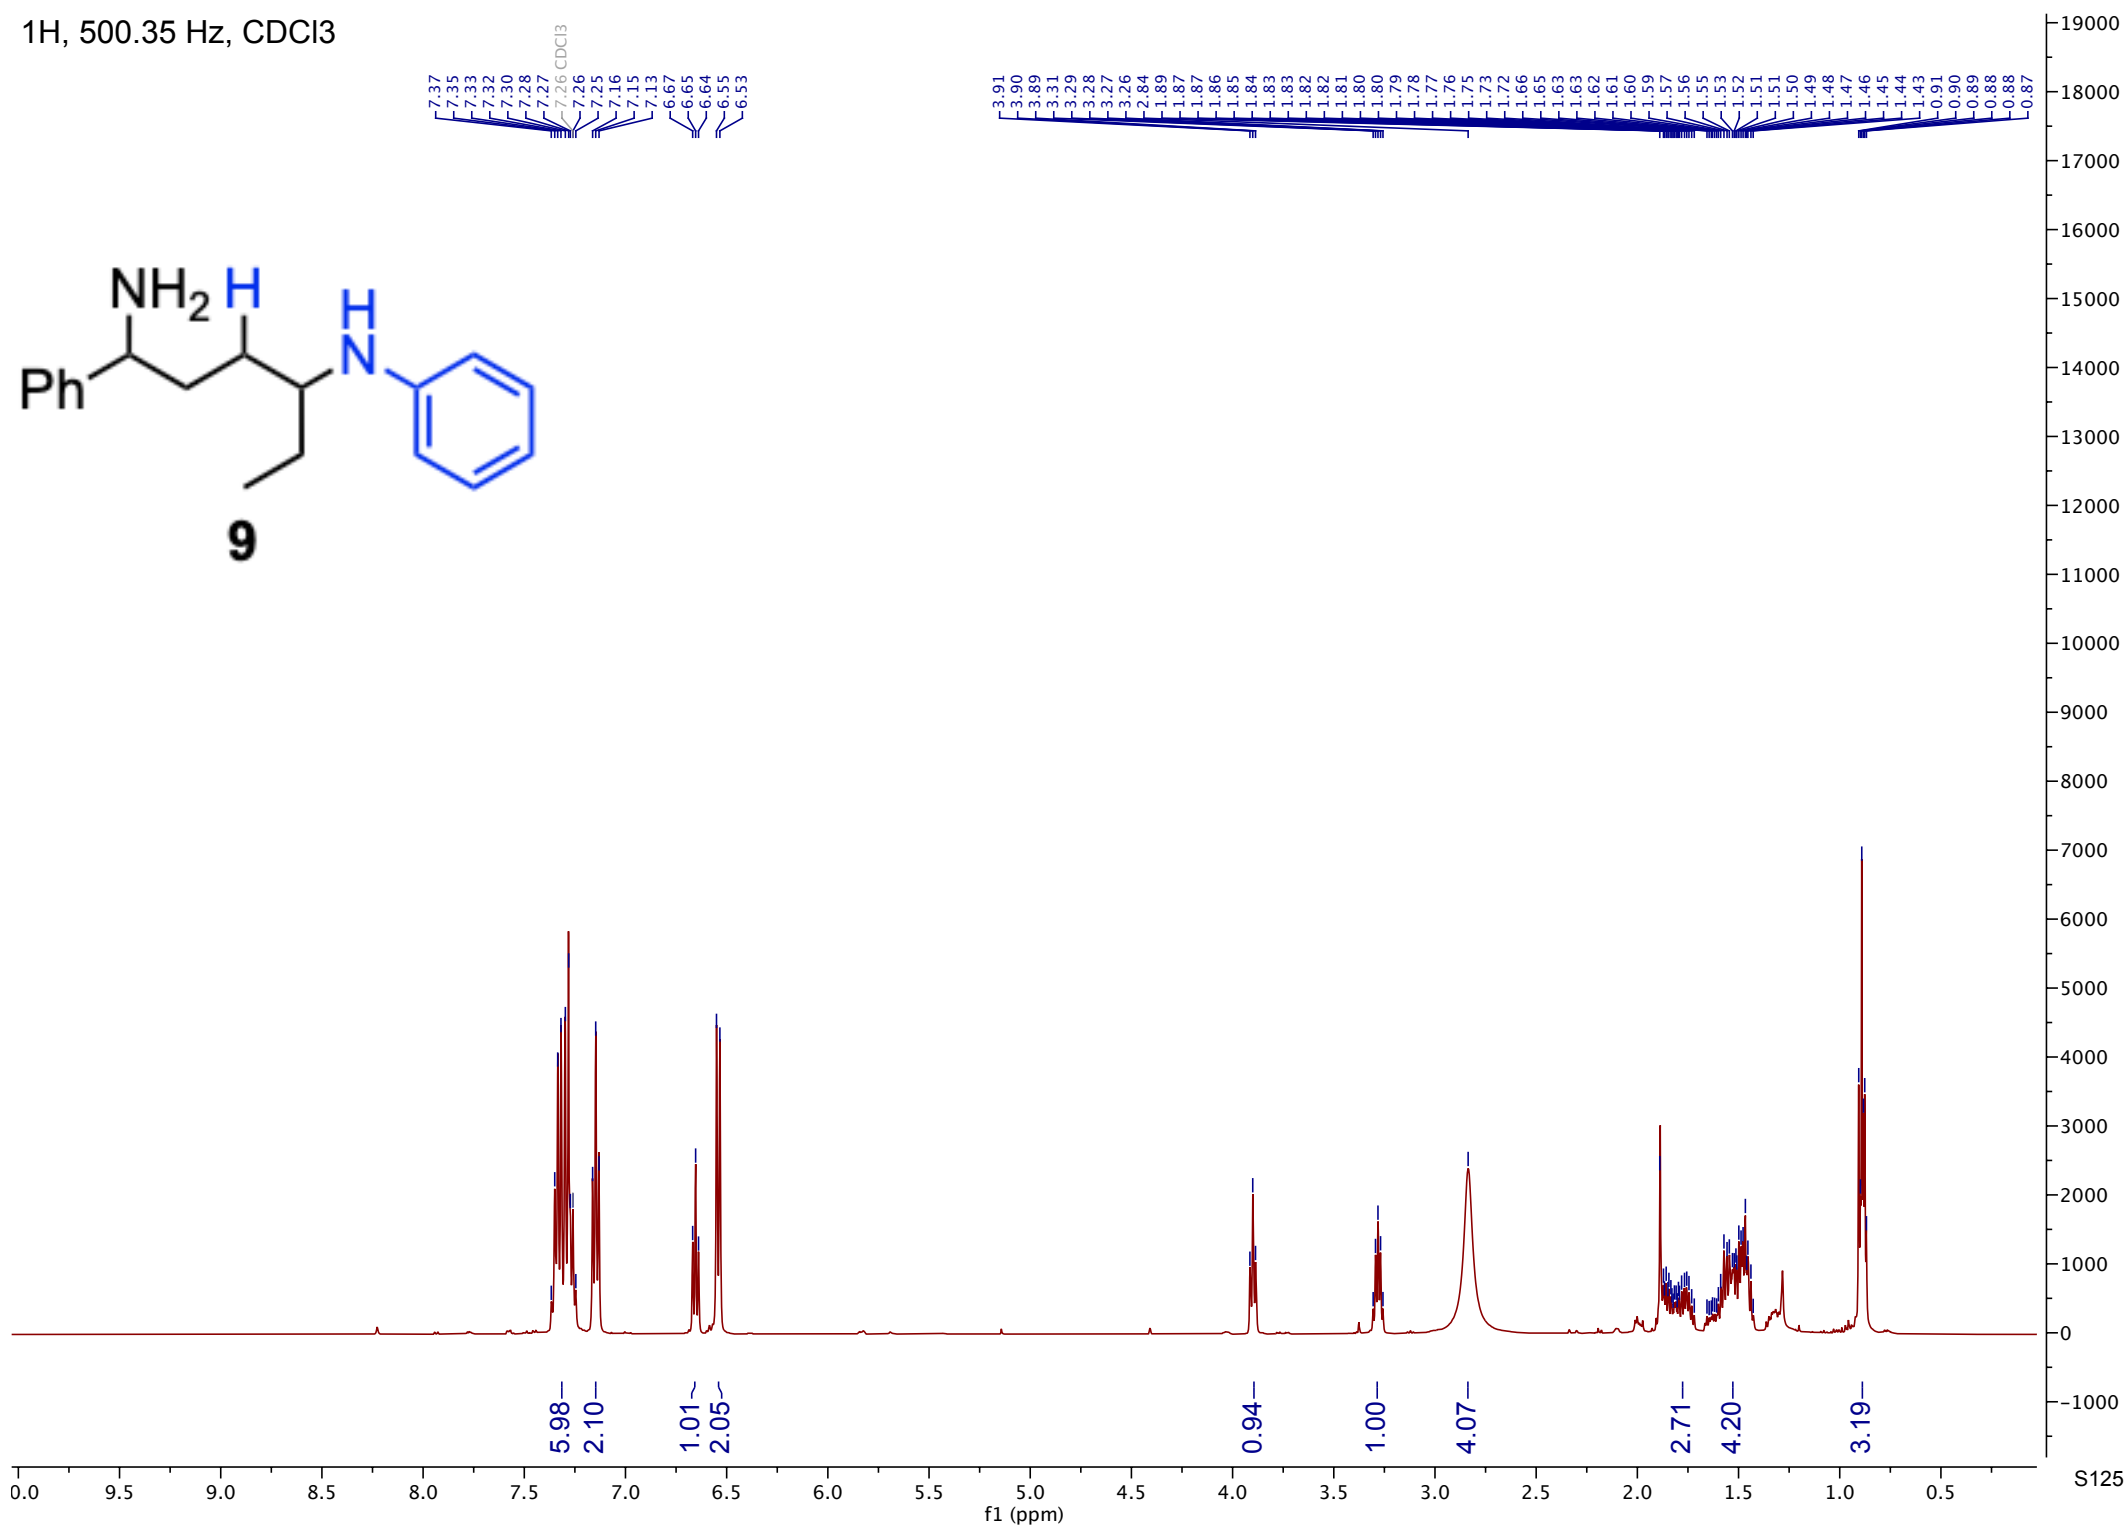

$^{13}\text{C}$ , 125.83 Hz,  $\text{CDCl}_3$

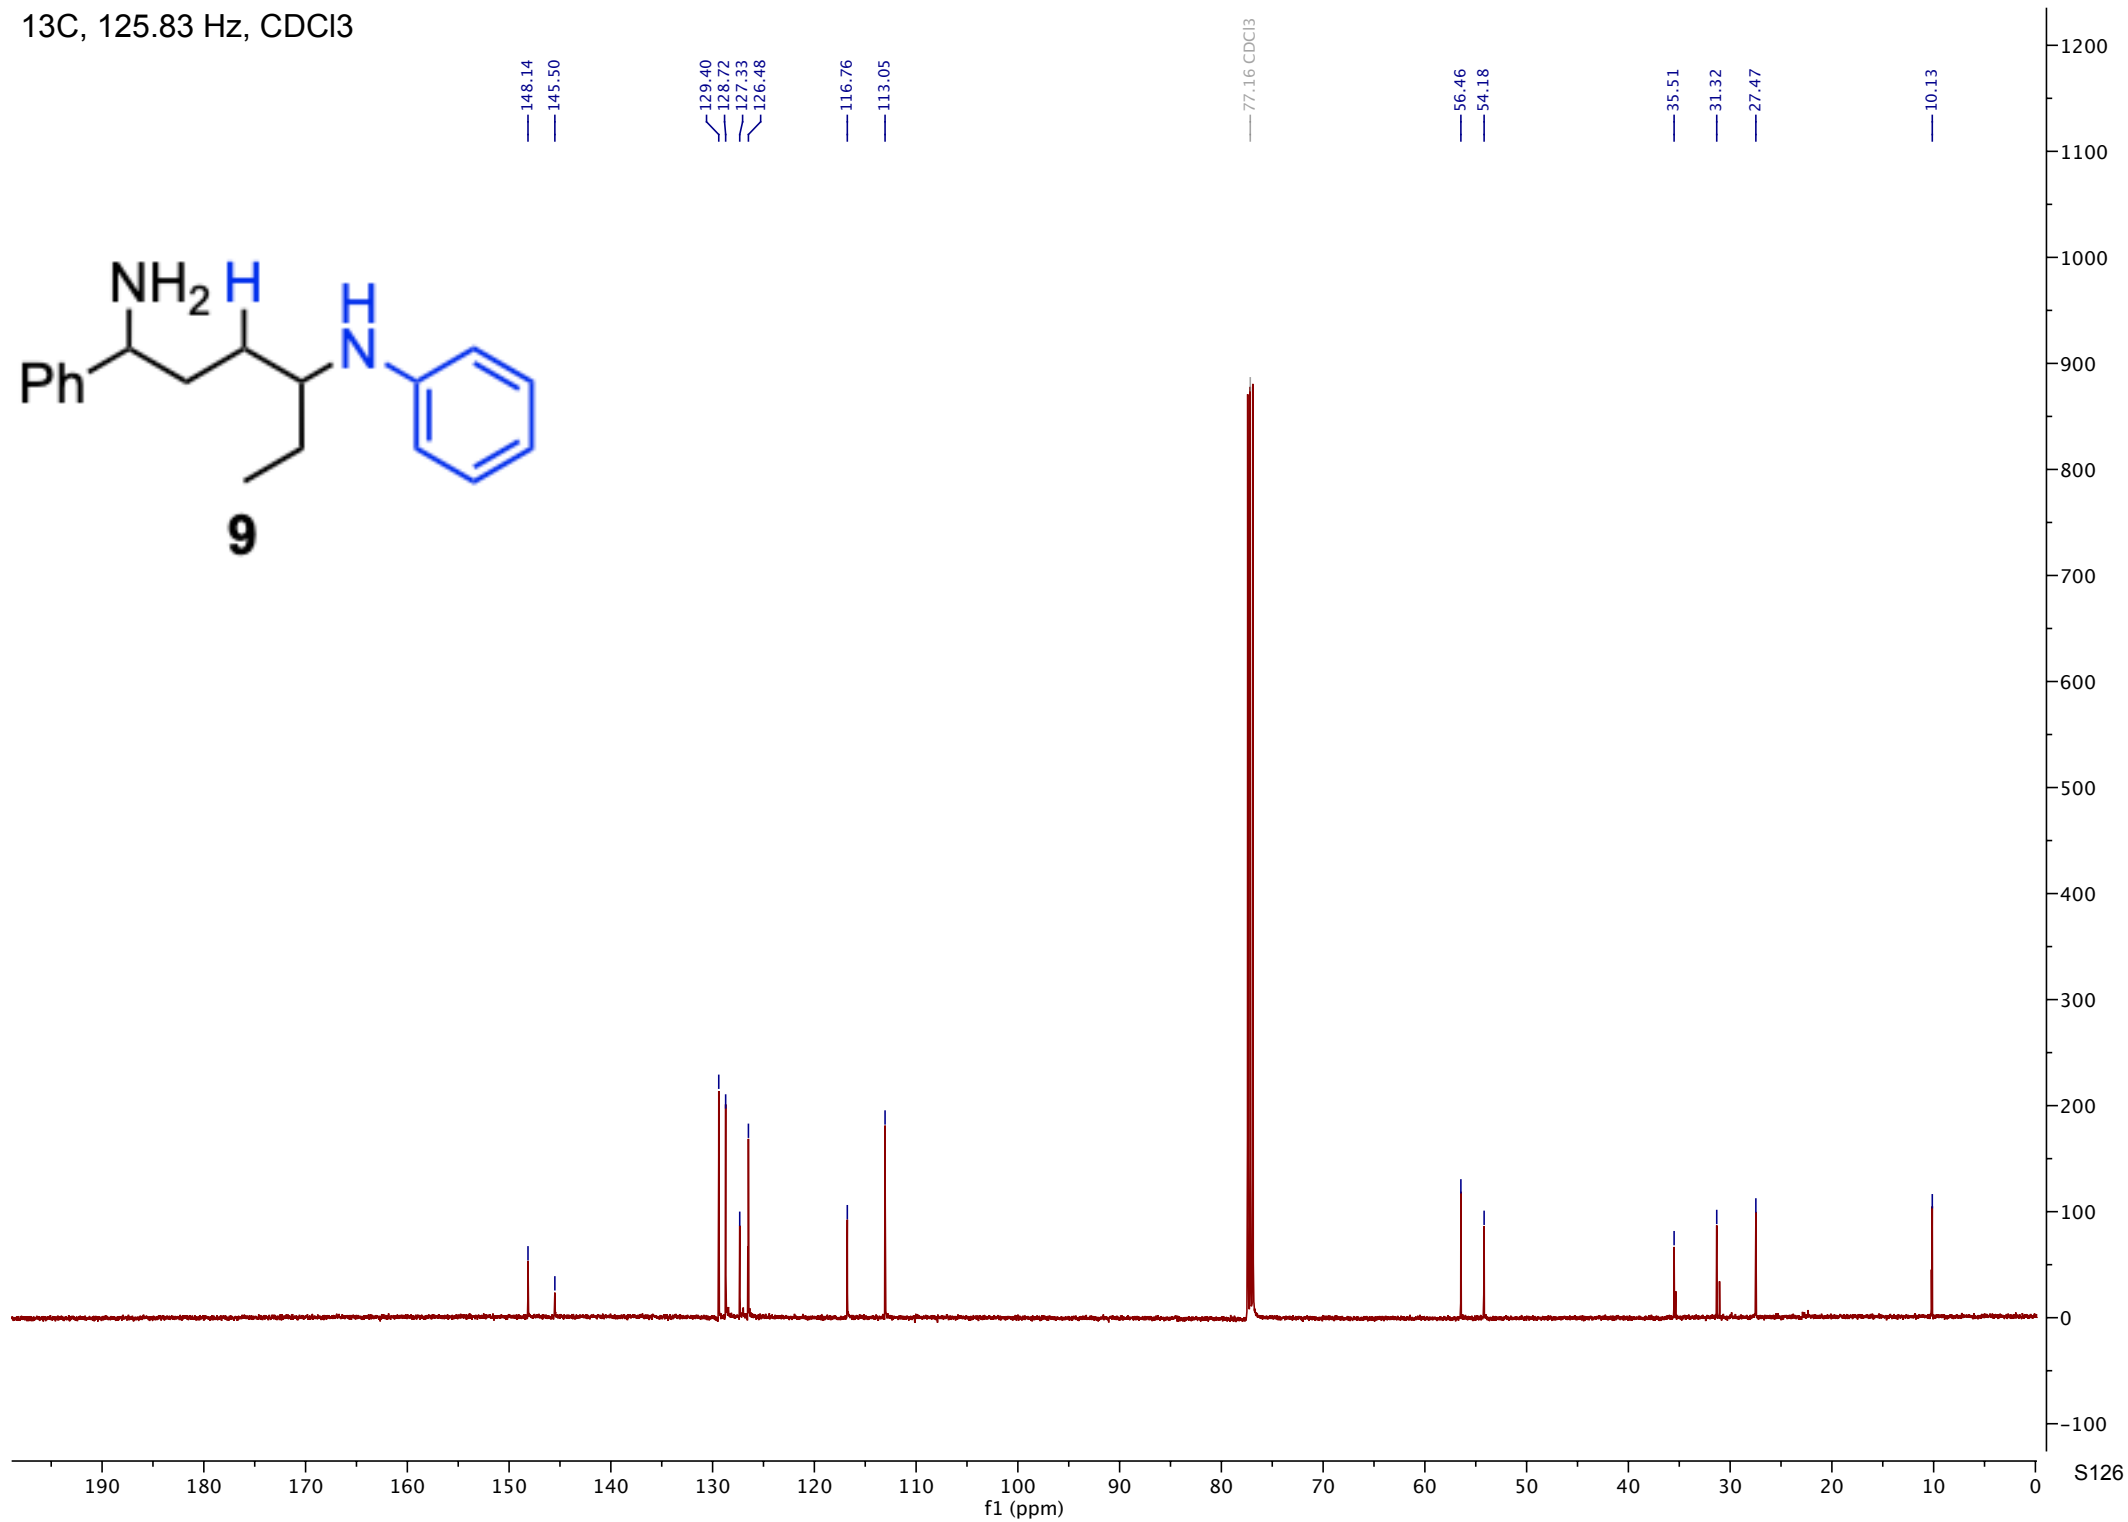

<sup>1</sup>H, 500.35 Hz, CDCl<sub>3</sub>

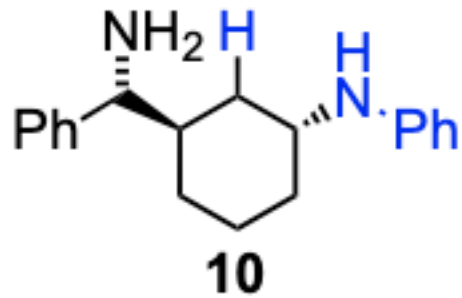

7.37  
7.35  
7.34  
7.30  
7.29  
7.27  
7.26 CDCl<sub>3</sub>  
7.21  
7.19  
7.18  
6.771  
6.69  
6.68  
6.66  
6.64

3.81  
3.80  
3.79  
3.70  
3.68

2.12  
2.09  
1.89  
1.88  
1.88  
1.87  
1.86  
1.85  
1.85  
1.84  
1.83  
1.82  
1.82  
1.79  
1.77  
1.66  
1.57  
1.57  
1.55  
1.54  
1.53  
1.52  
1.50  
1.50  
1.48  
1.46  
1.45  
1.45  
1.44  
1.42  
0.99  
0.98  
0.96  
0.94  
0.93  
0.92  
0.91

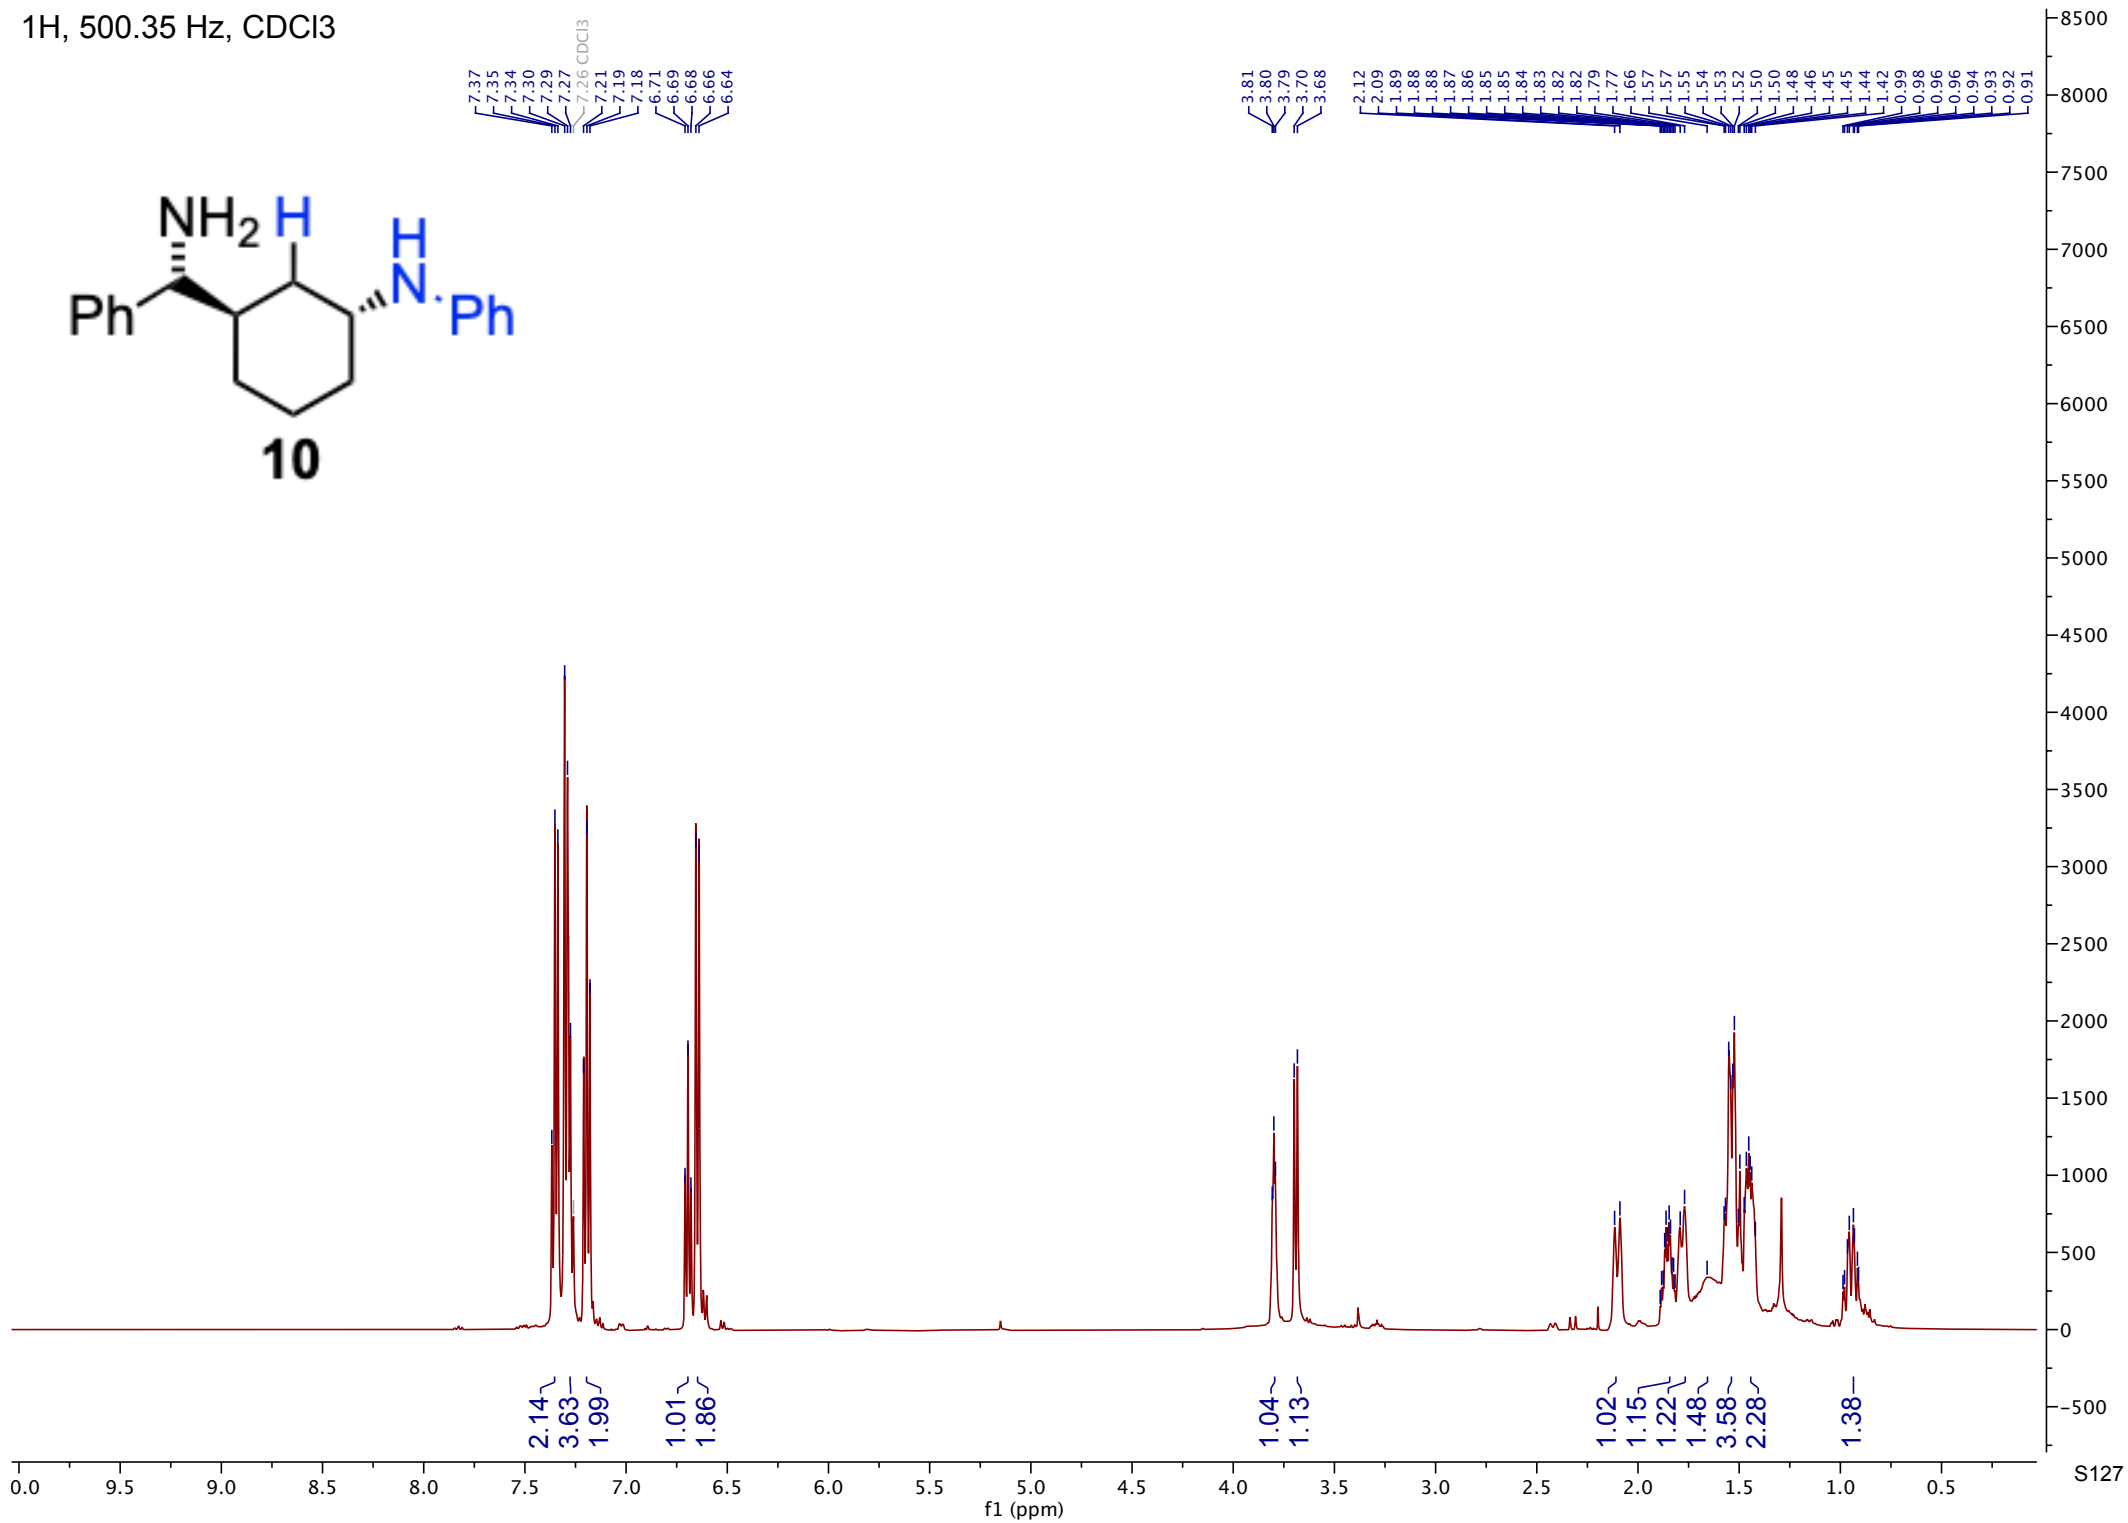

$^{13}\text{C}$ , 125.83 Hz,  $\text{CDCl}_3$

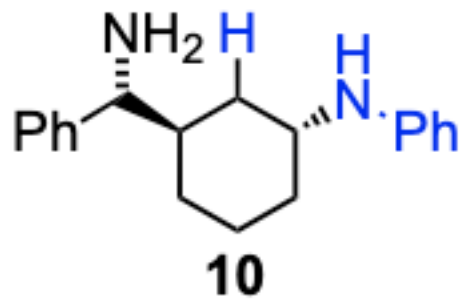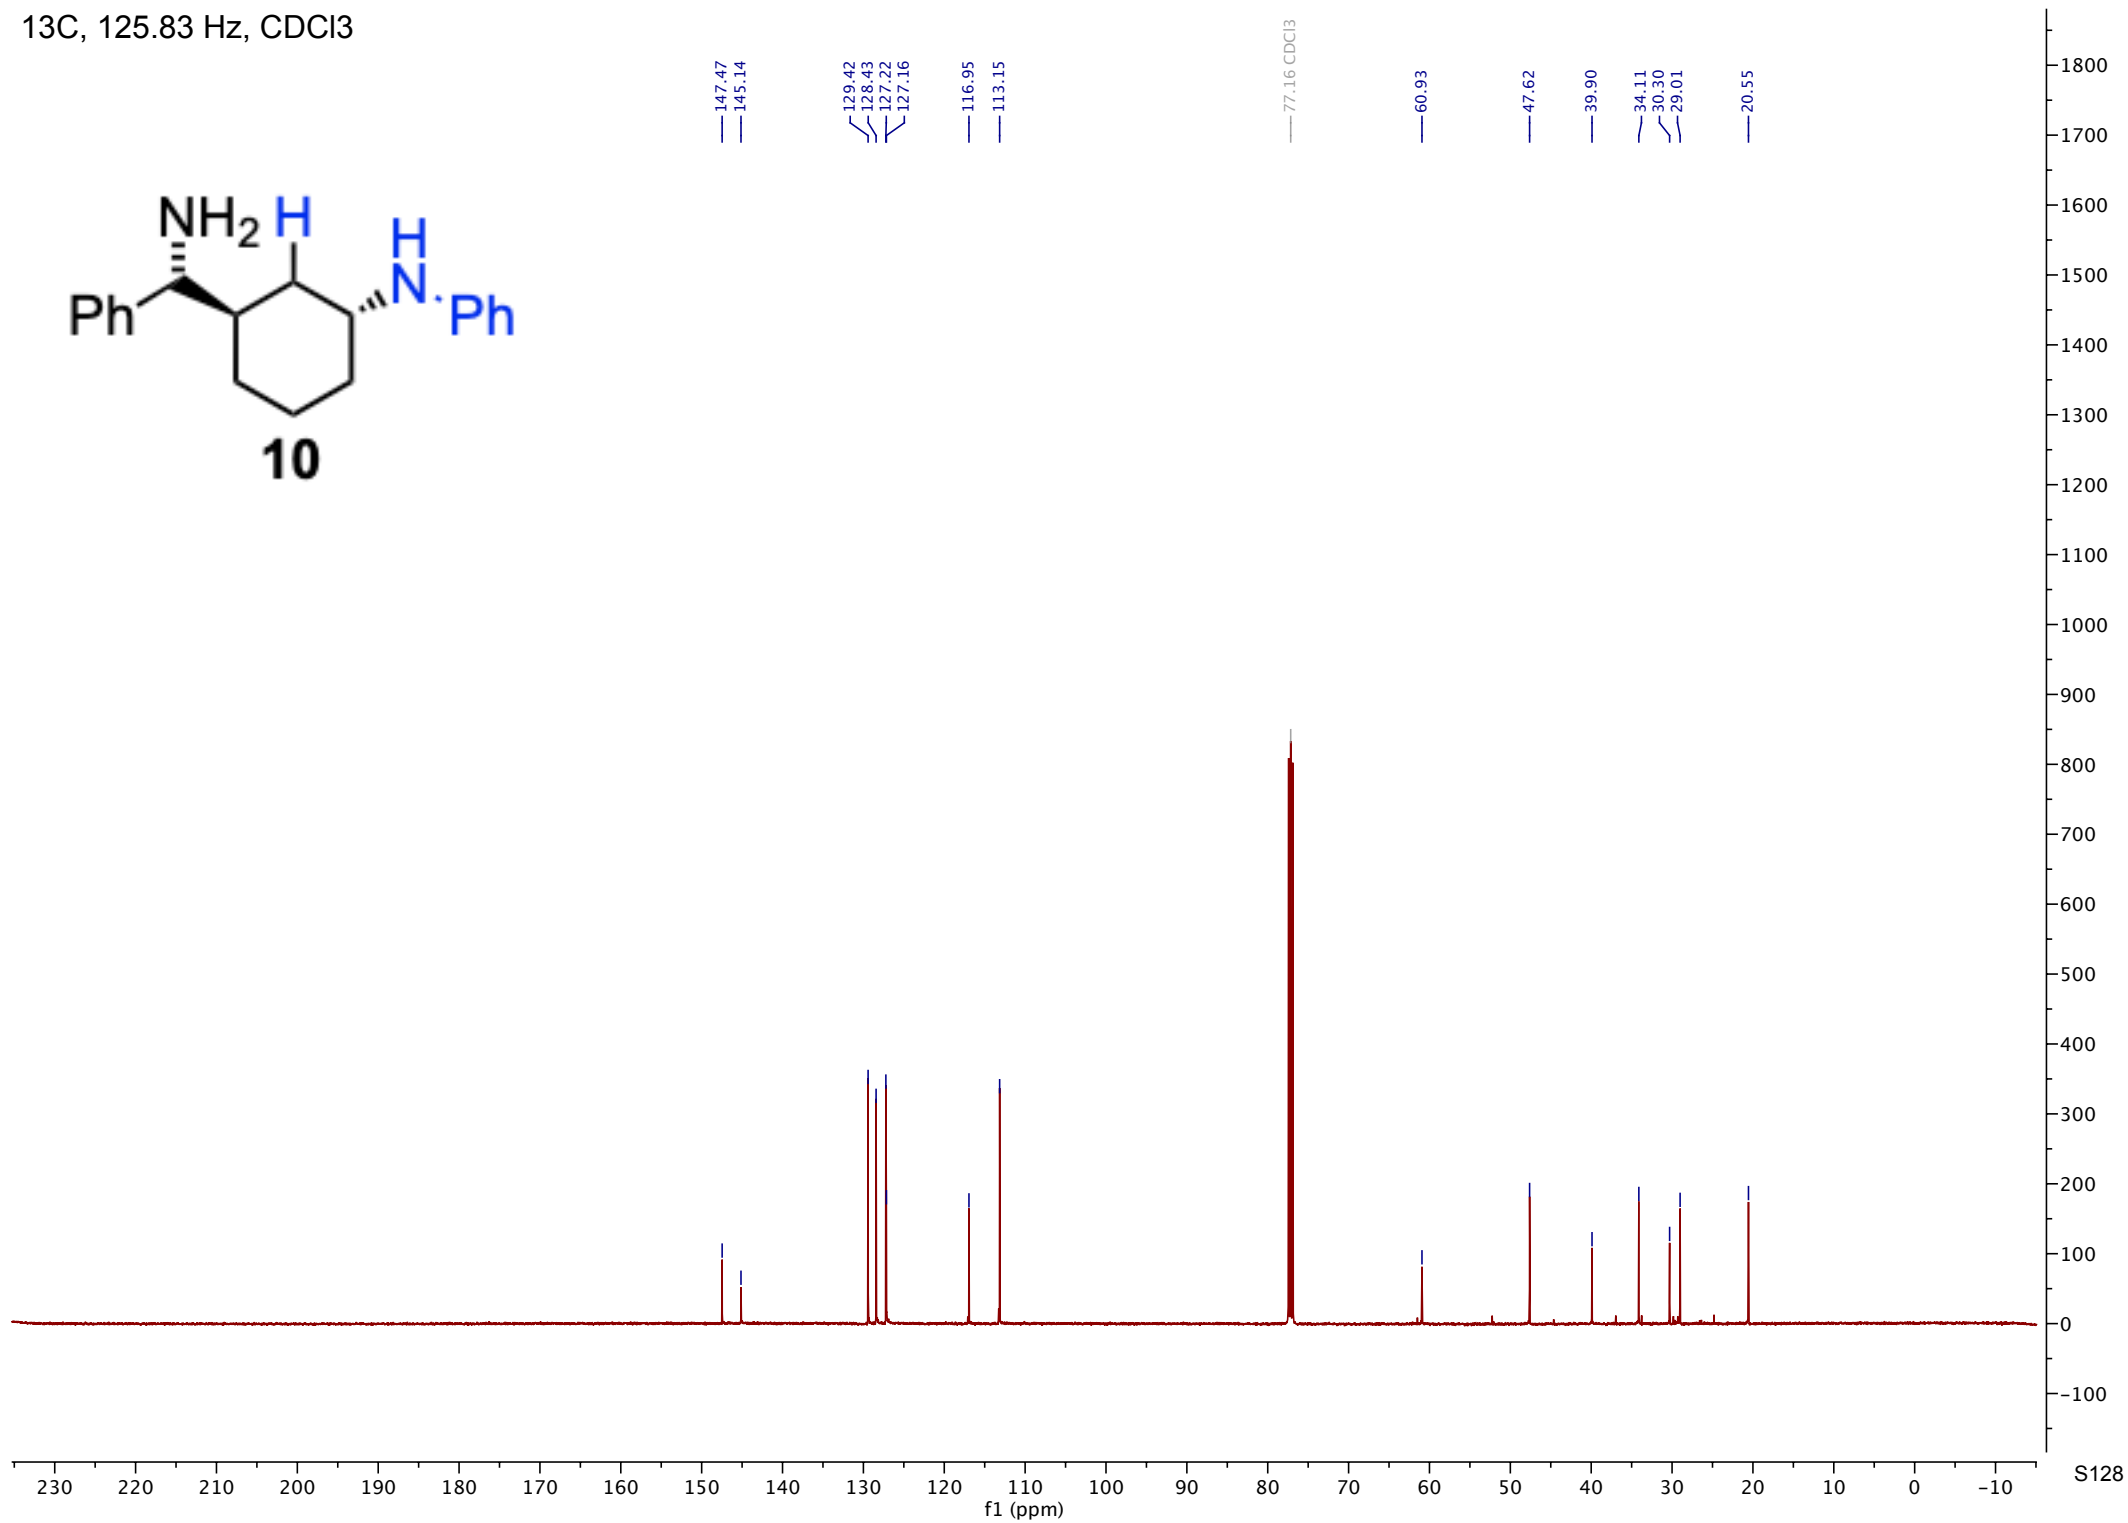



1H, 500.35 Hz, CDCl3

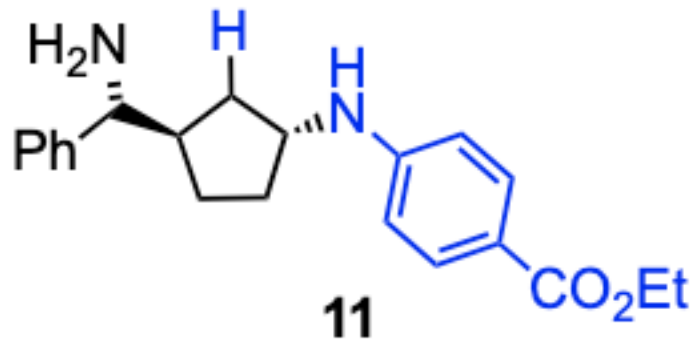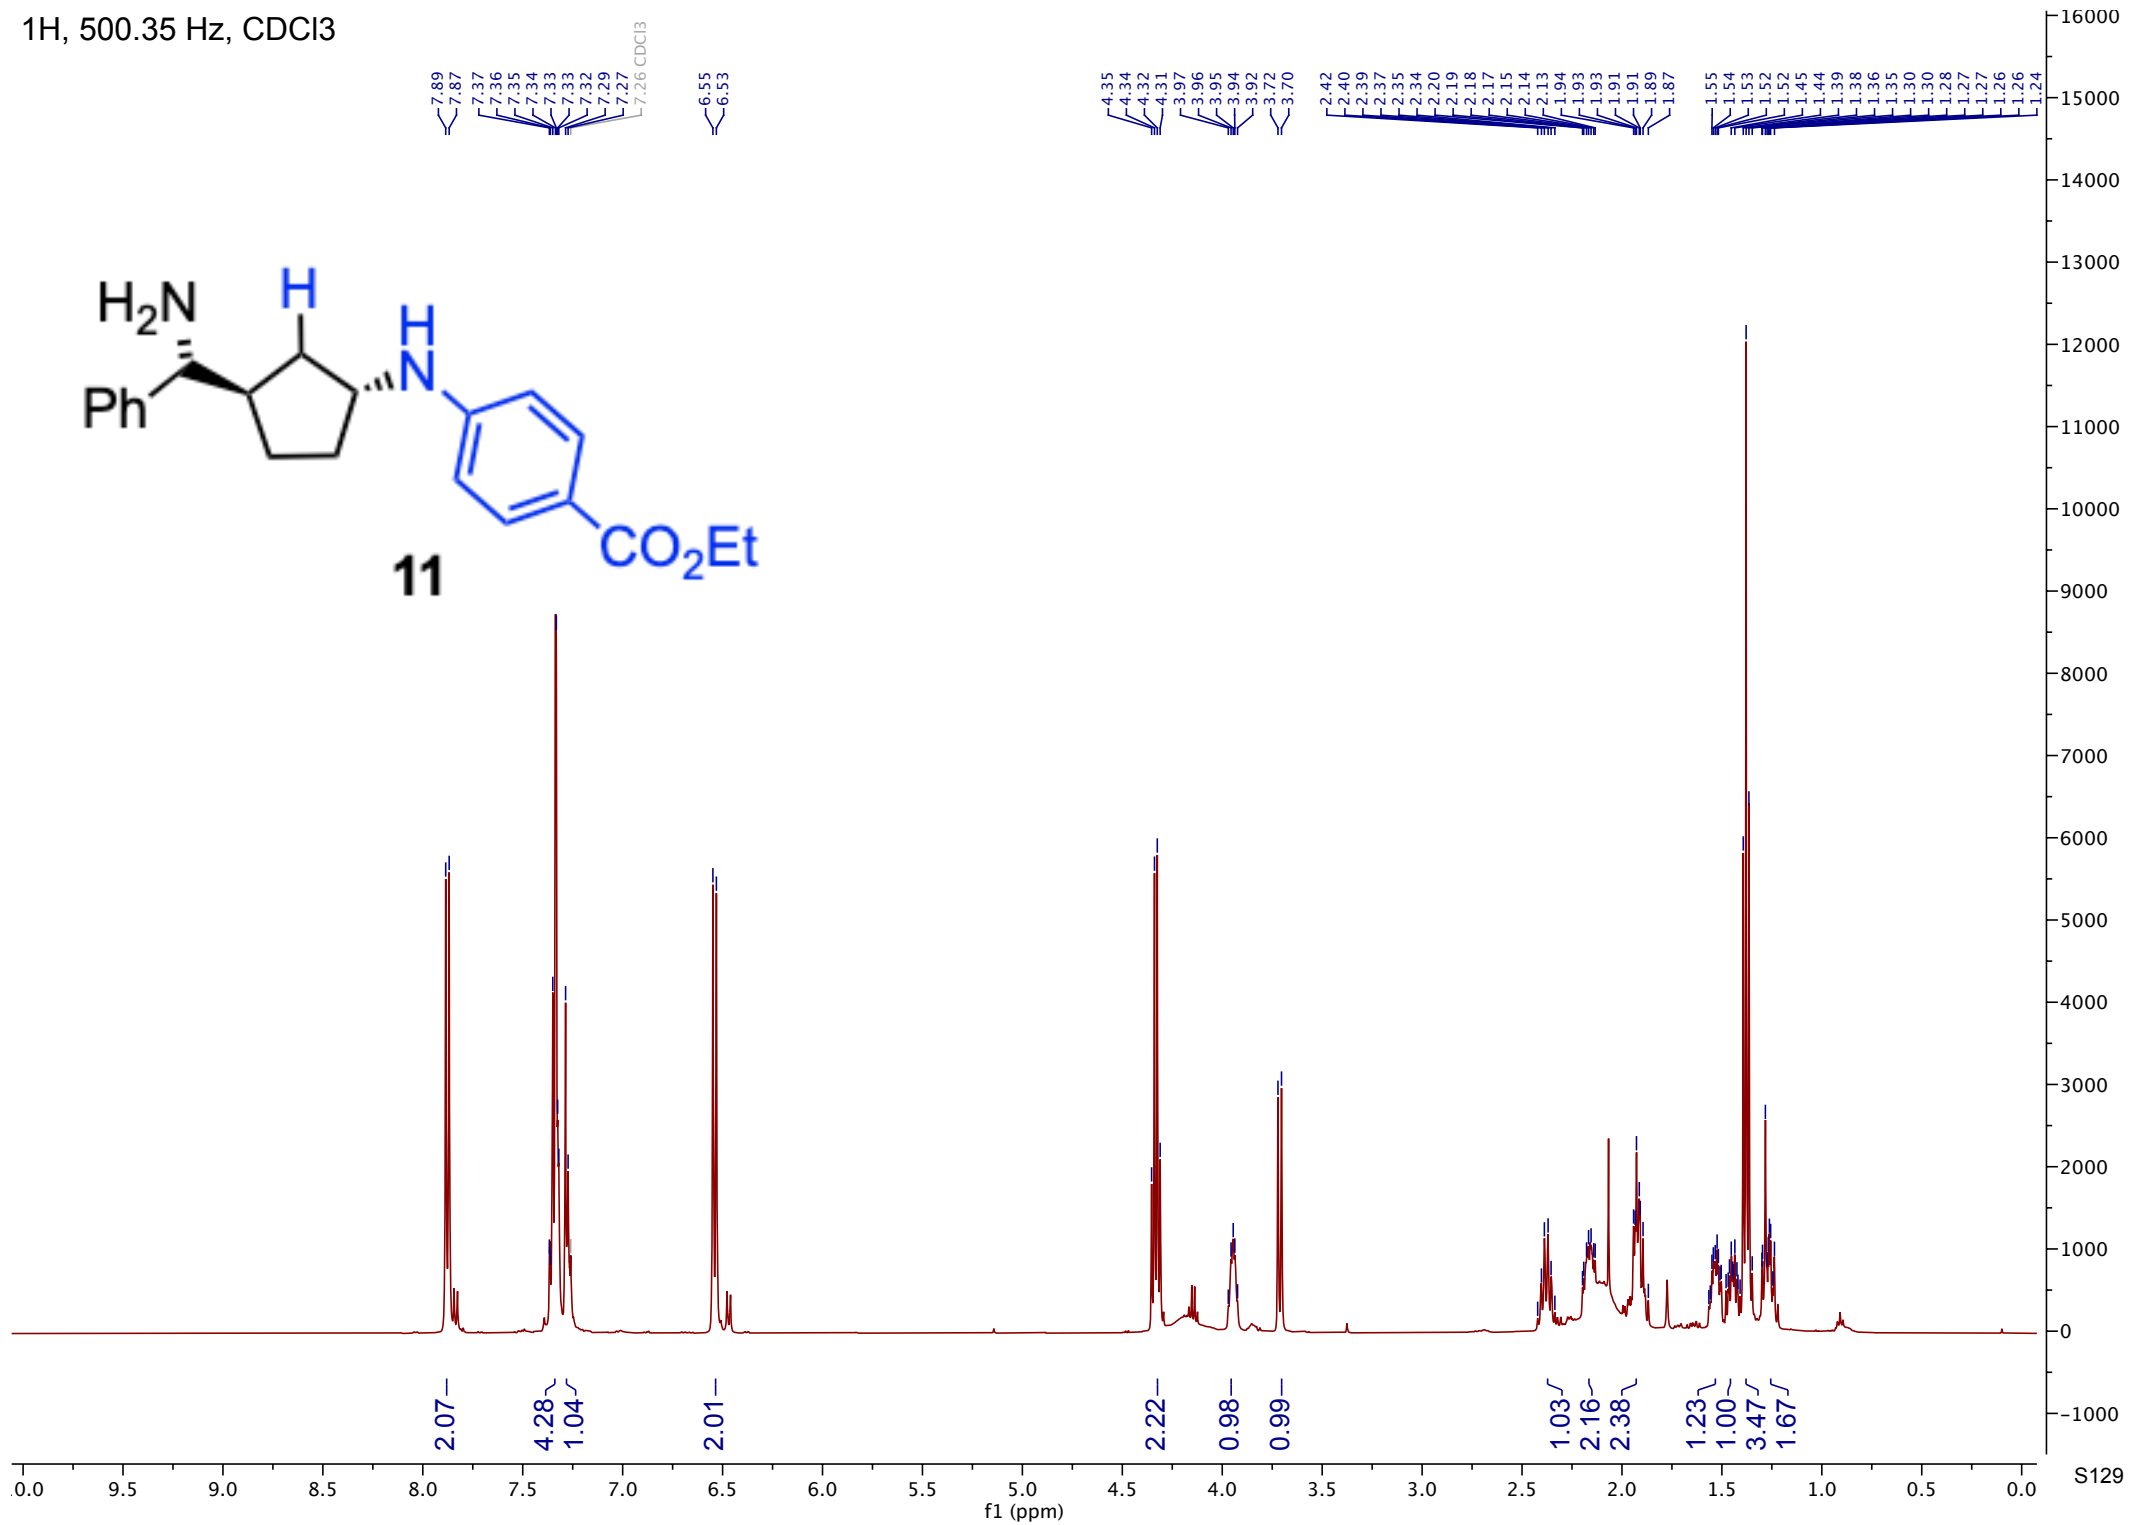

$^{13}\text{C}$ , 125.83 Hz,  $\text{CDCl}_3$



**11**

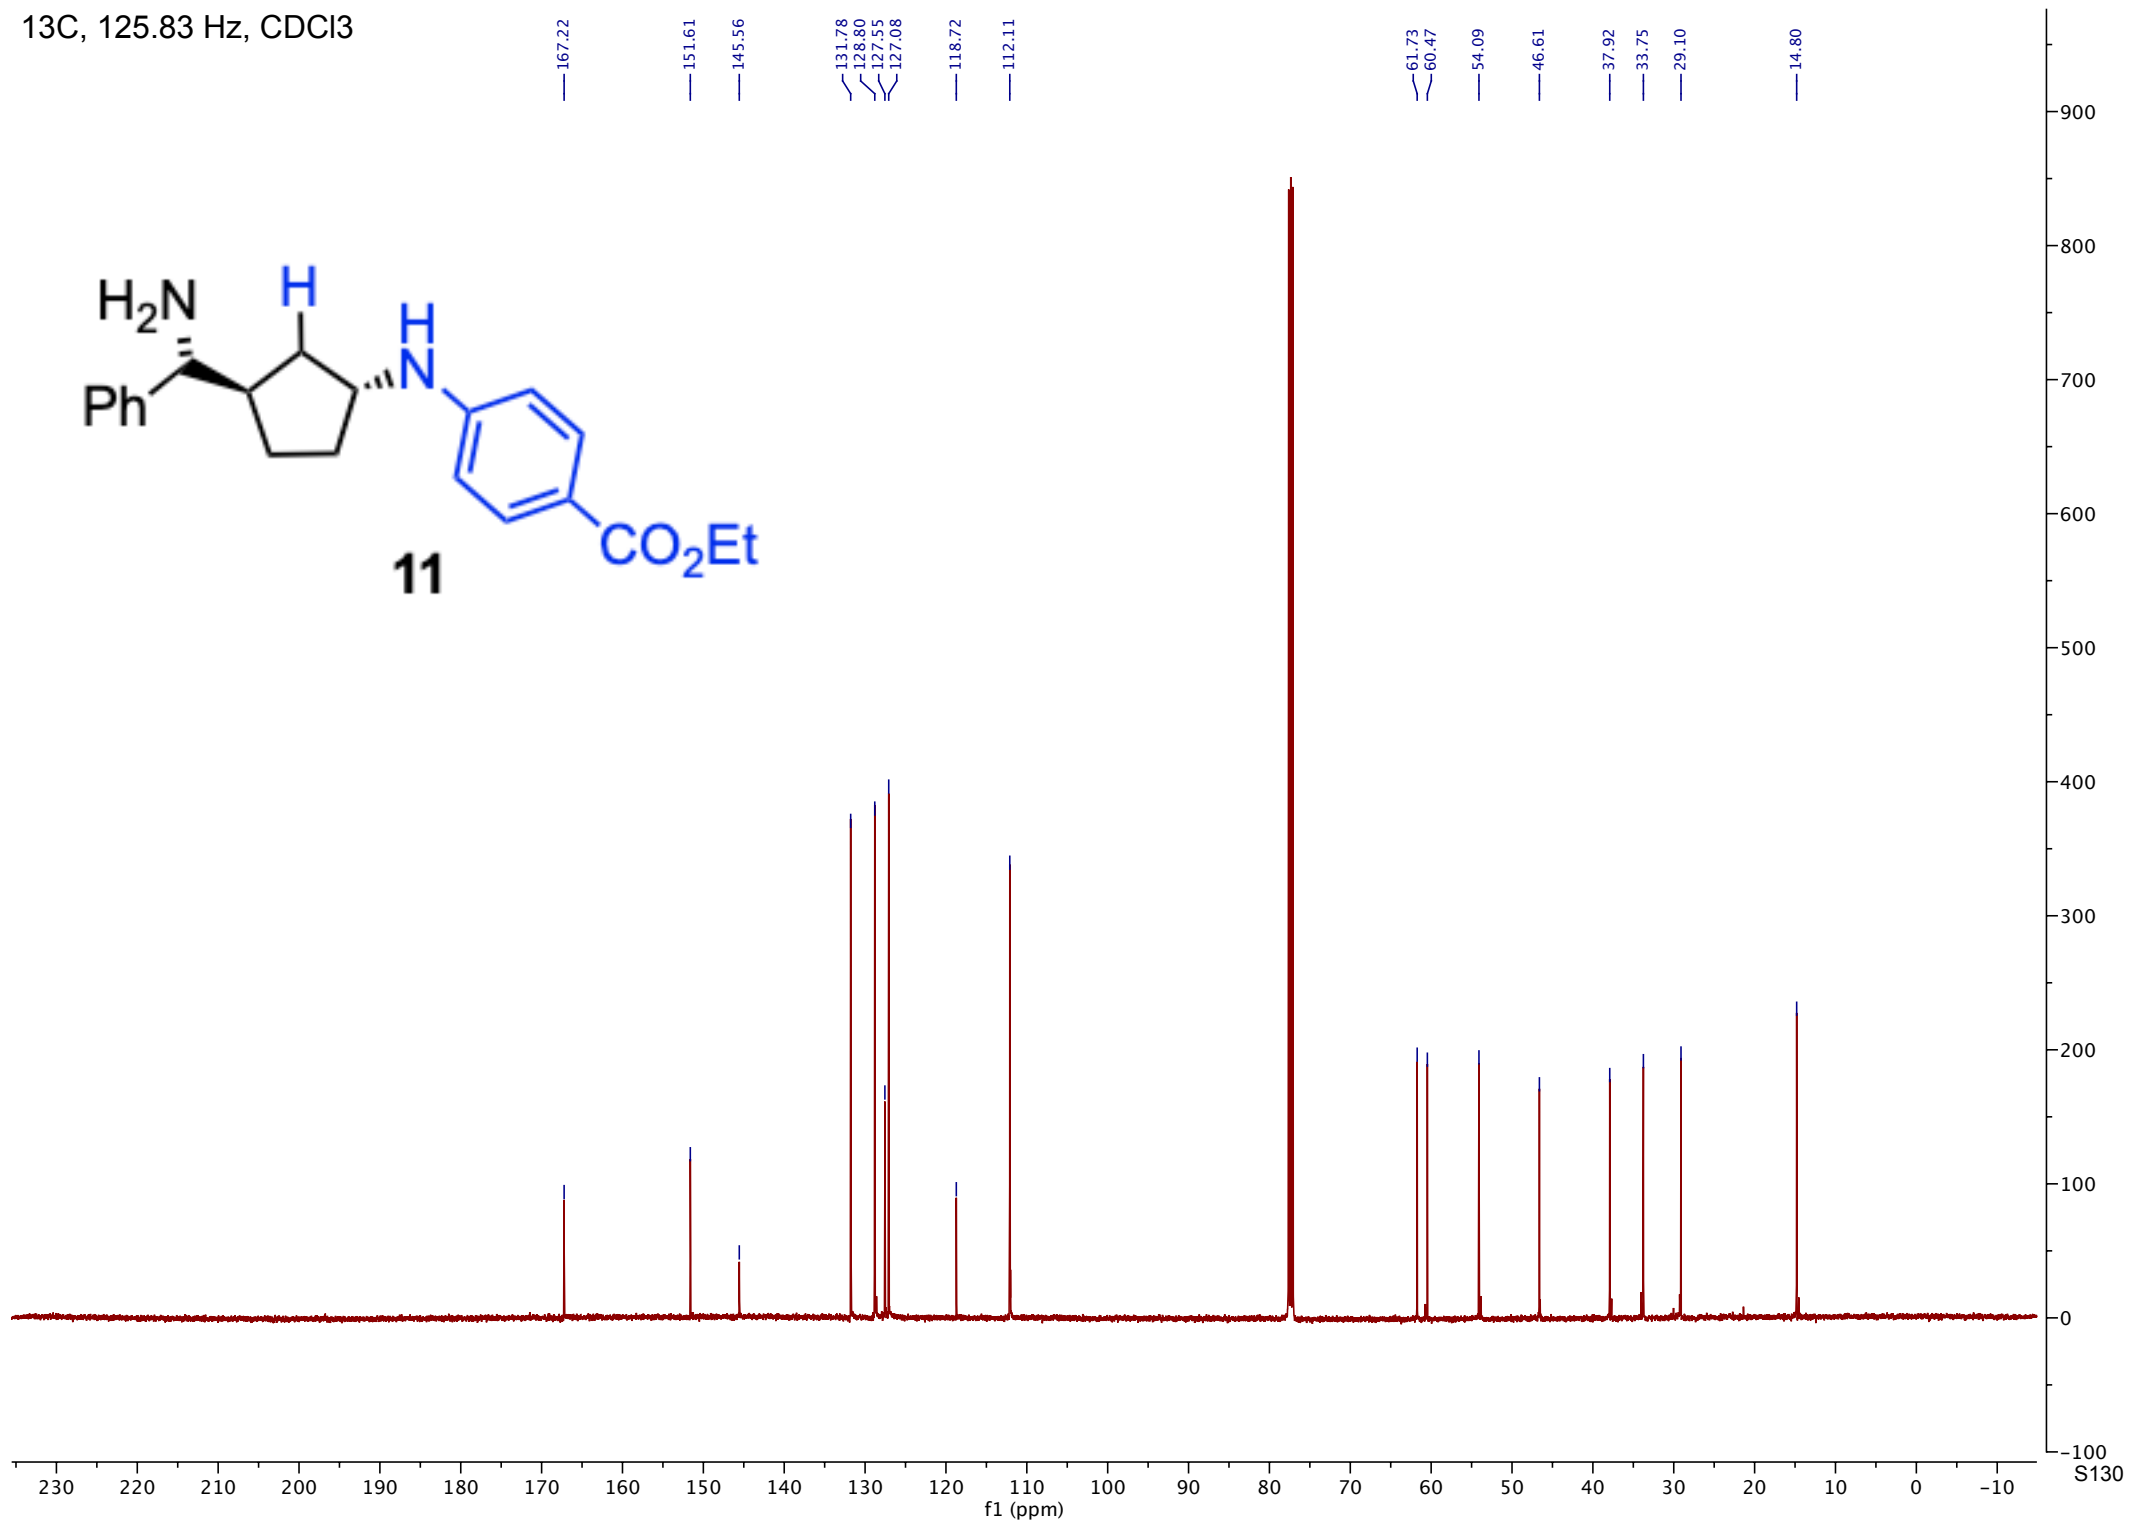

<sup>1</sup>H, 500.35 Hz, CDCl<sub>3</sub>

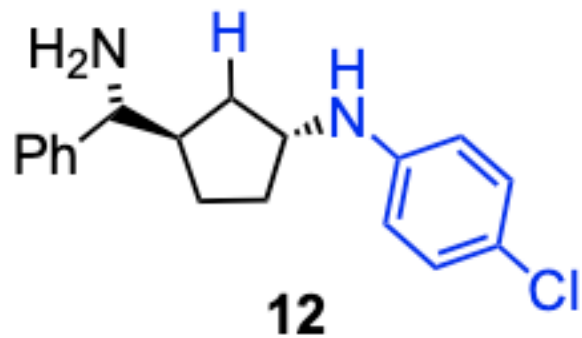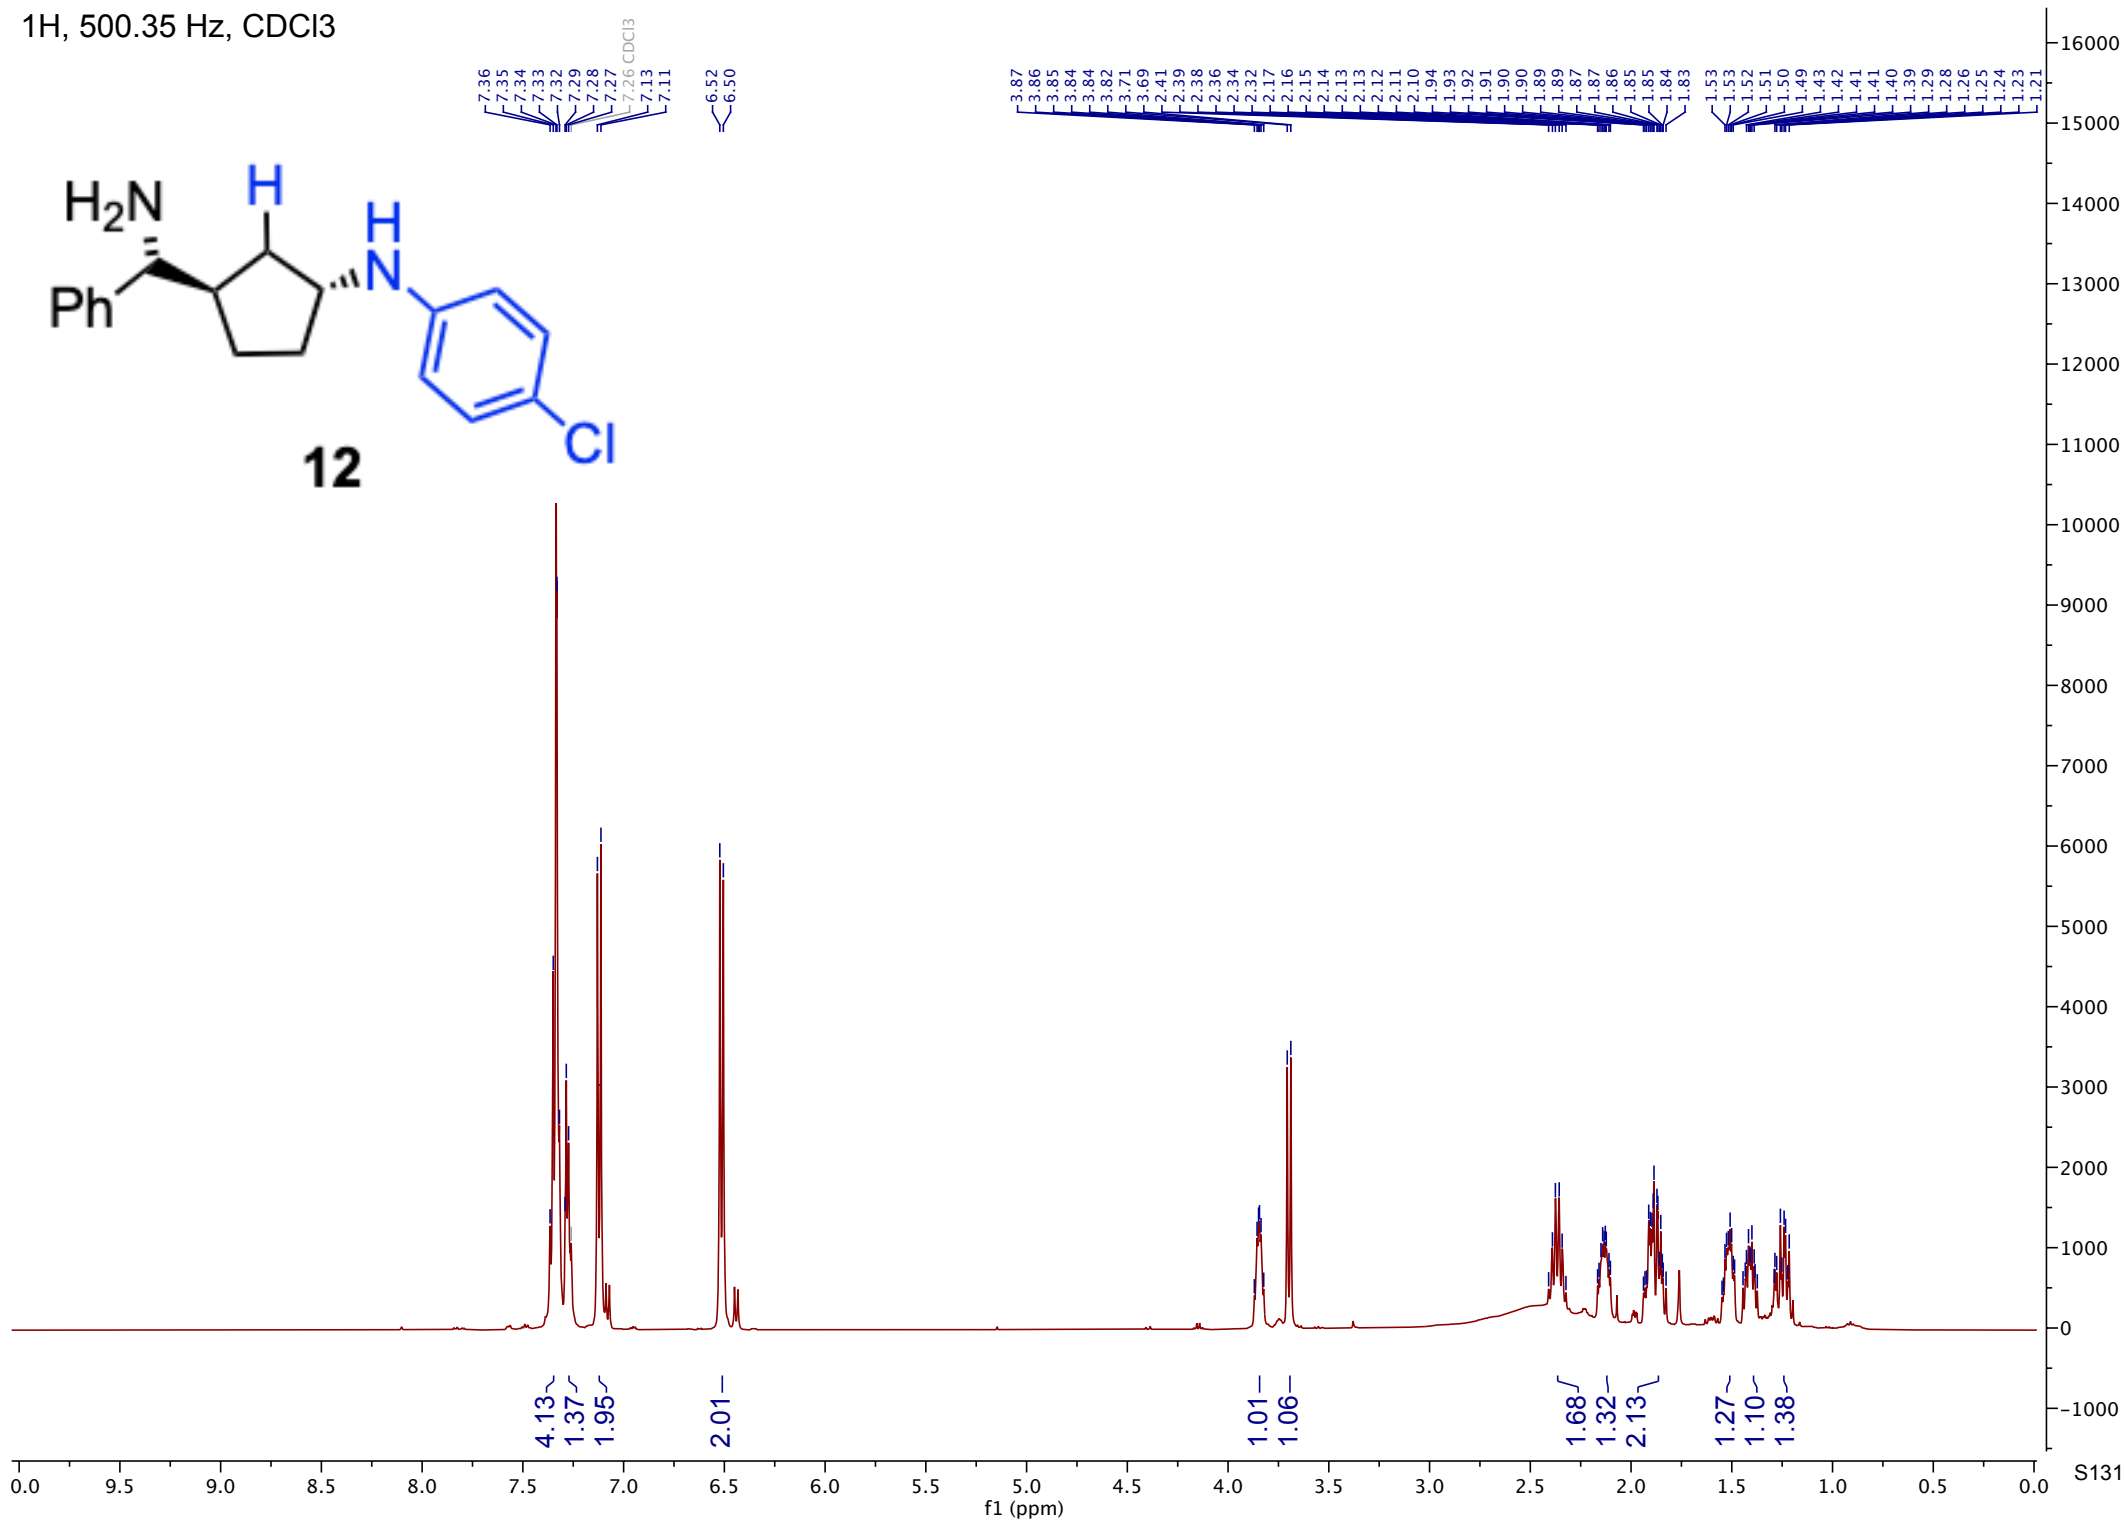

$^{13}\text{C}$ , 125.83 Hz,  $\text{CDCl}_3$

146.59  
145.64

129.31  
128.78  
127.51  
127.09

121.90

114.51

61.80

54.58

46.60

37.91

33.78

29.17

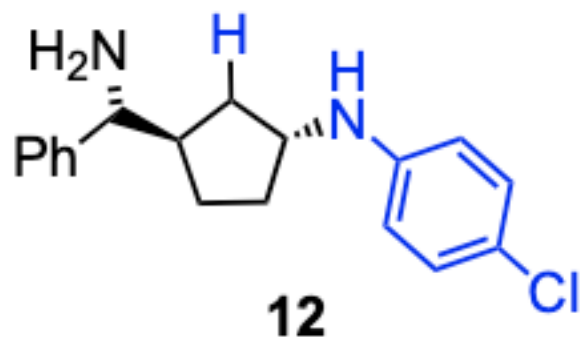

**12**

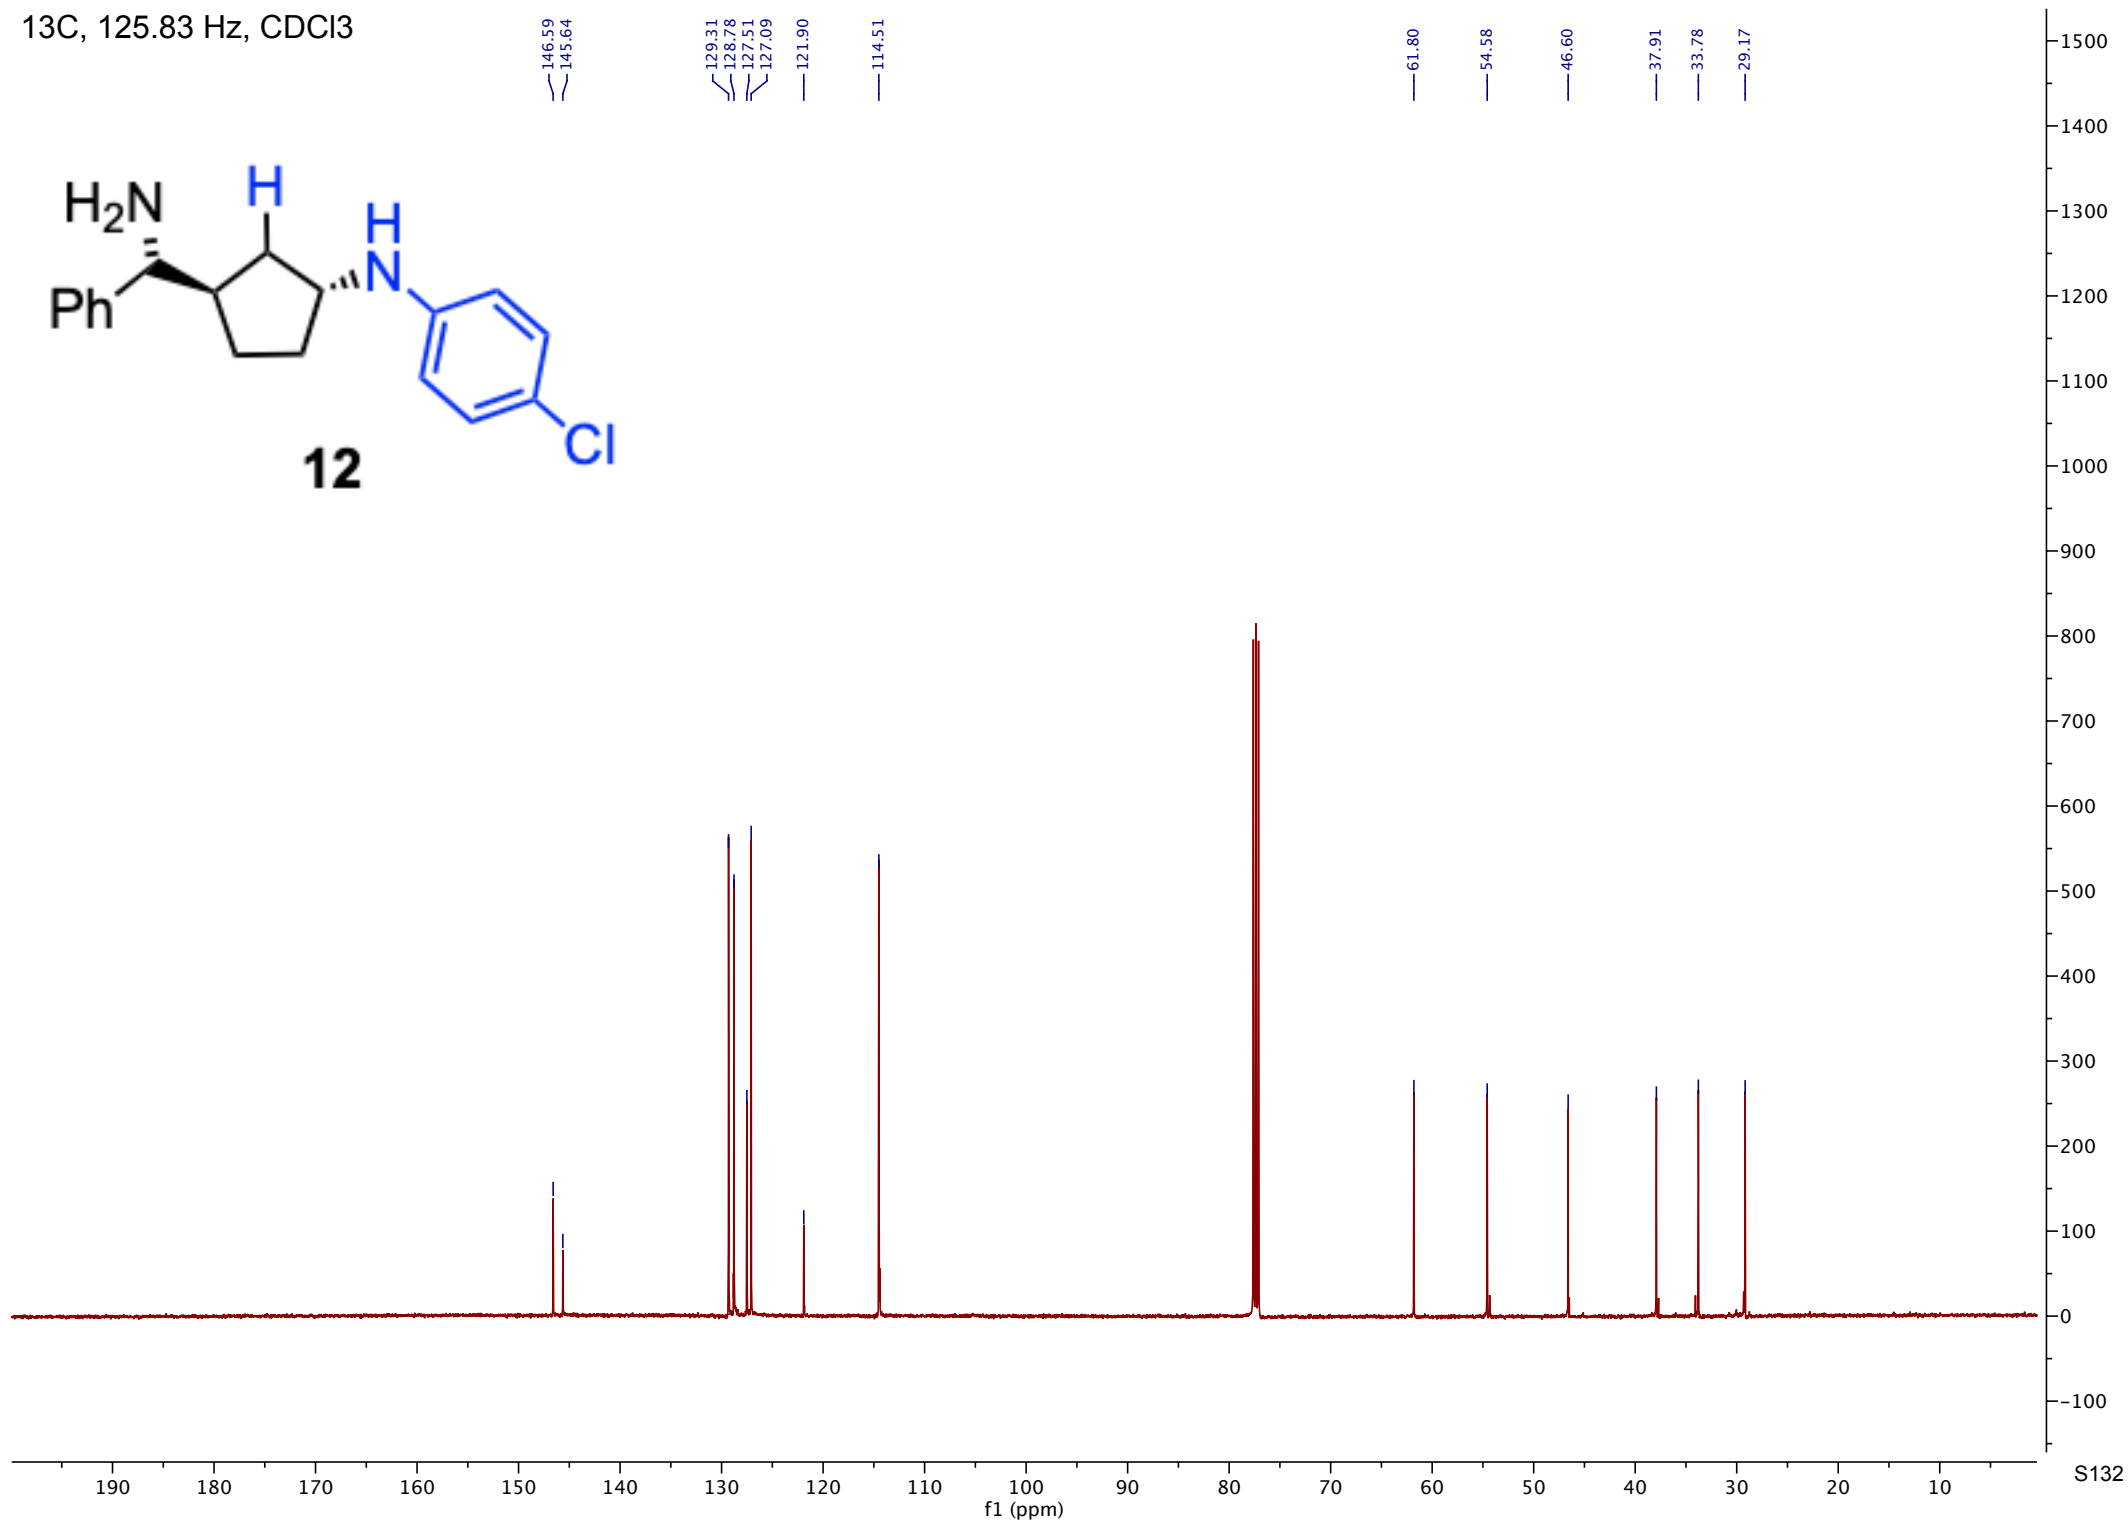

<sup>1</sup>H, 500.35 Hz, CDCl<sub>3</sub>

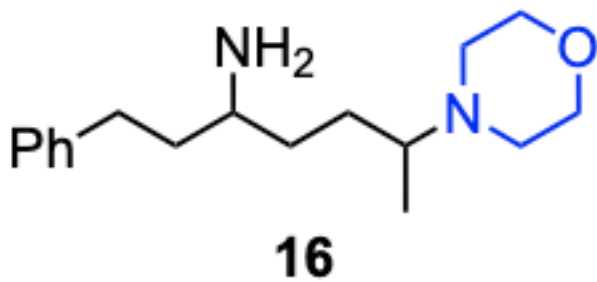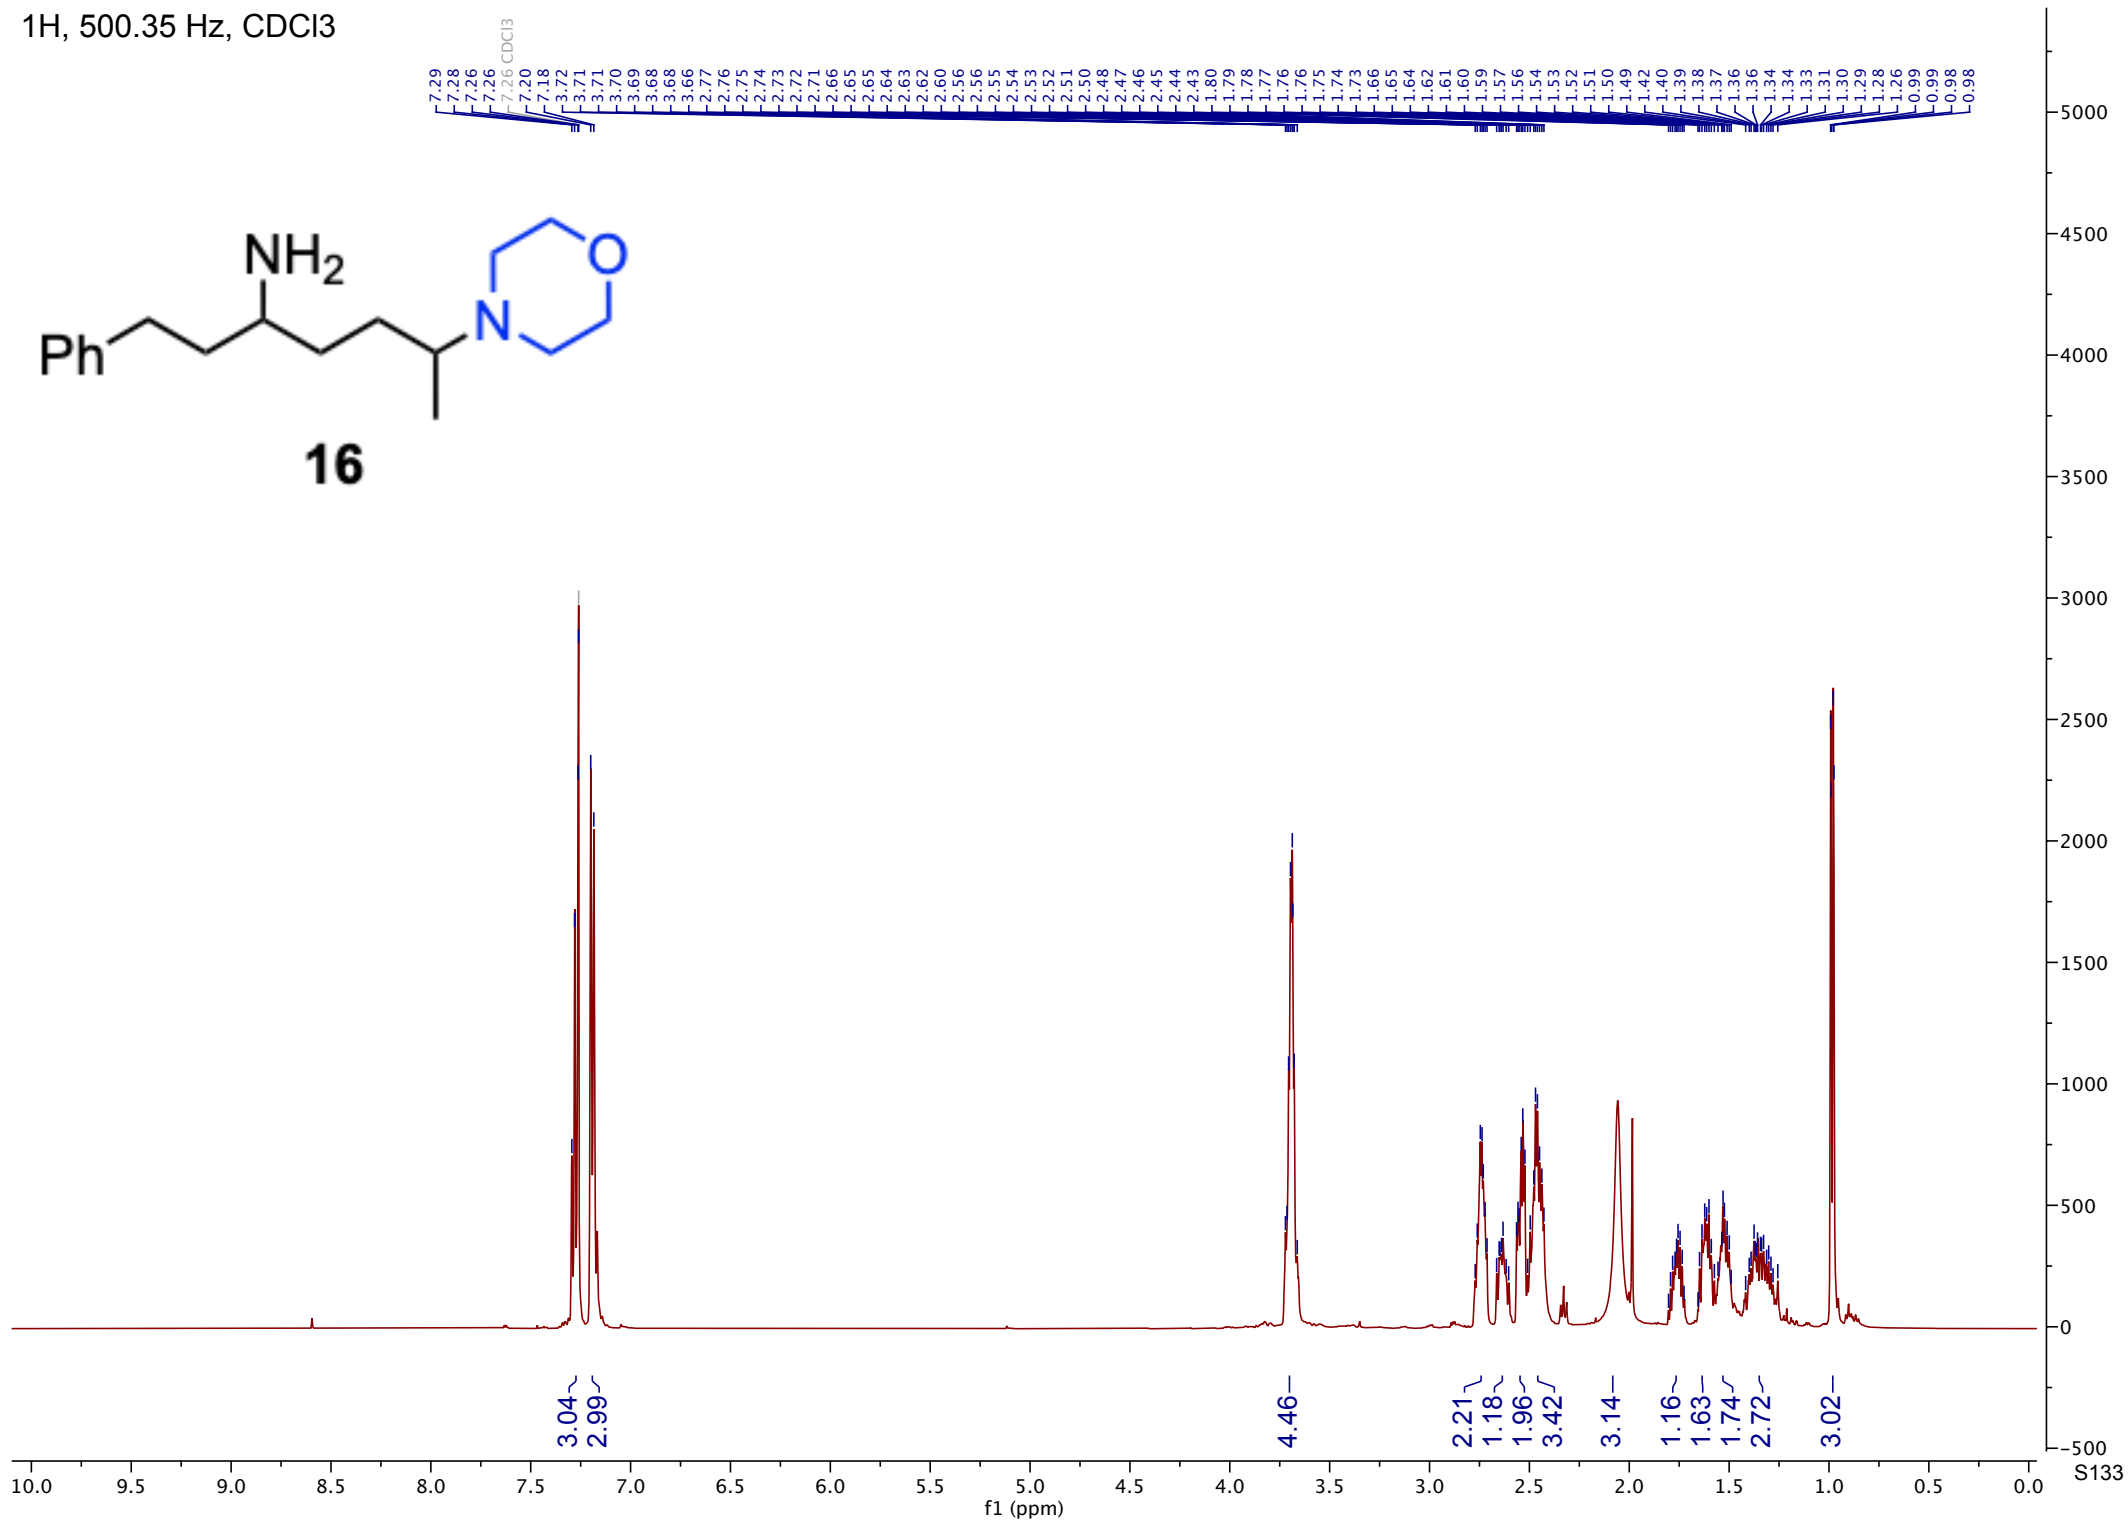

$^{13}\text{C}$ , 125.83 Hz,  $\text{CDCl}_3$

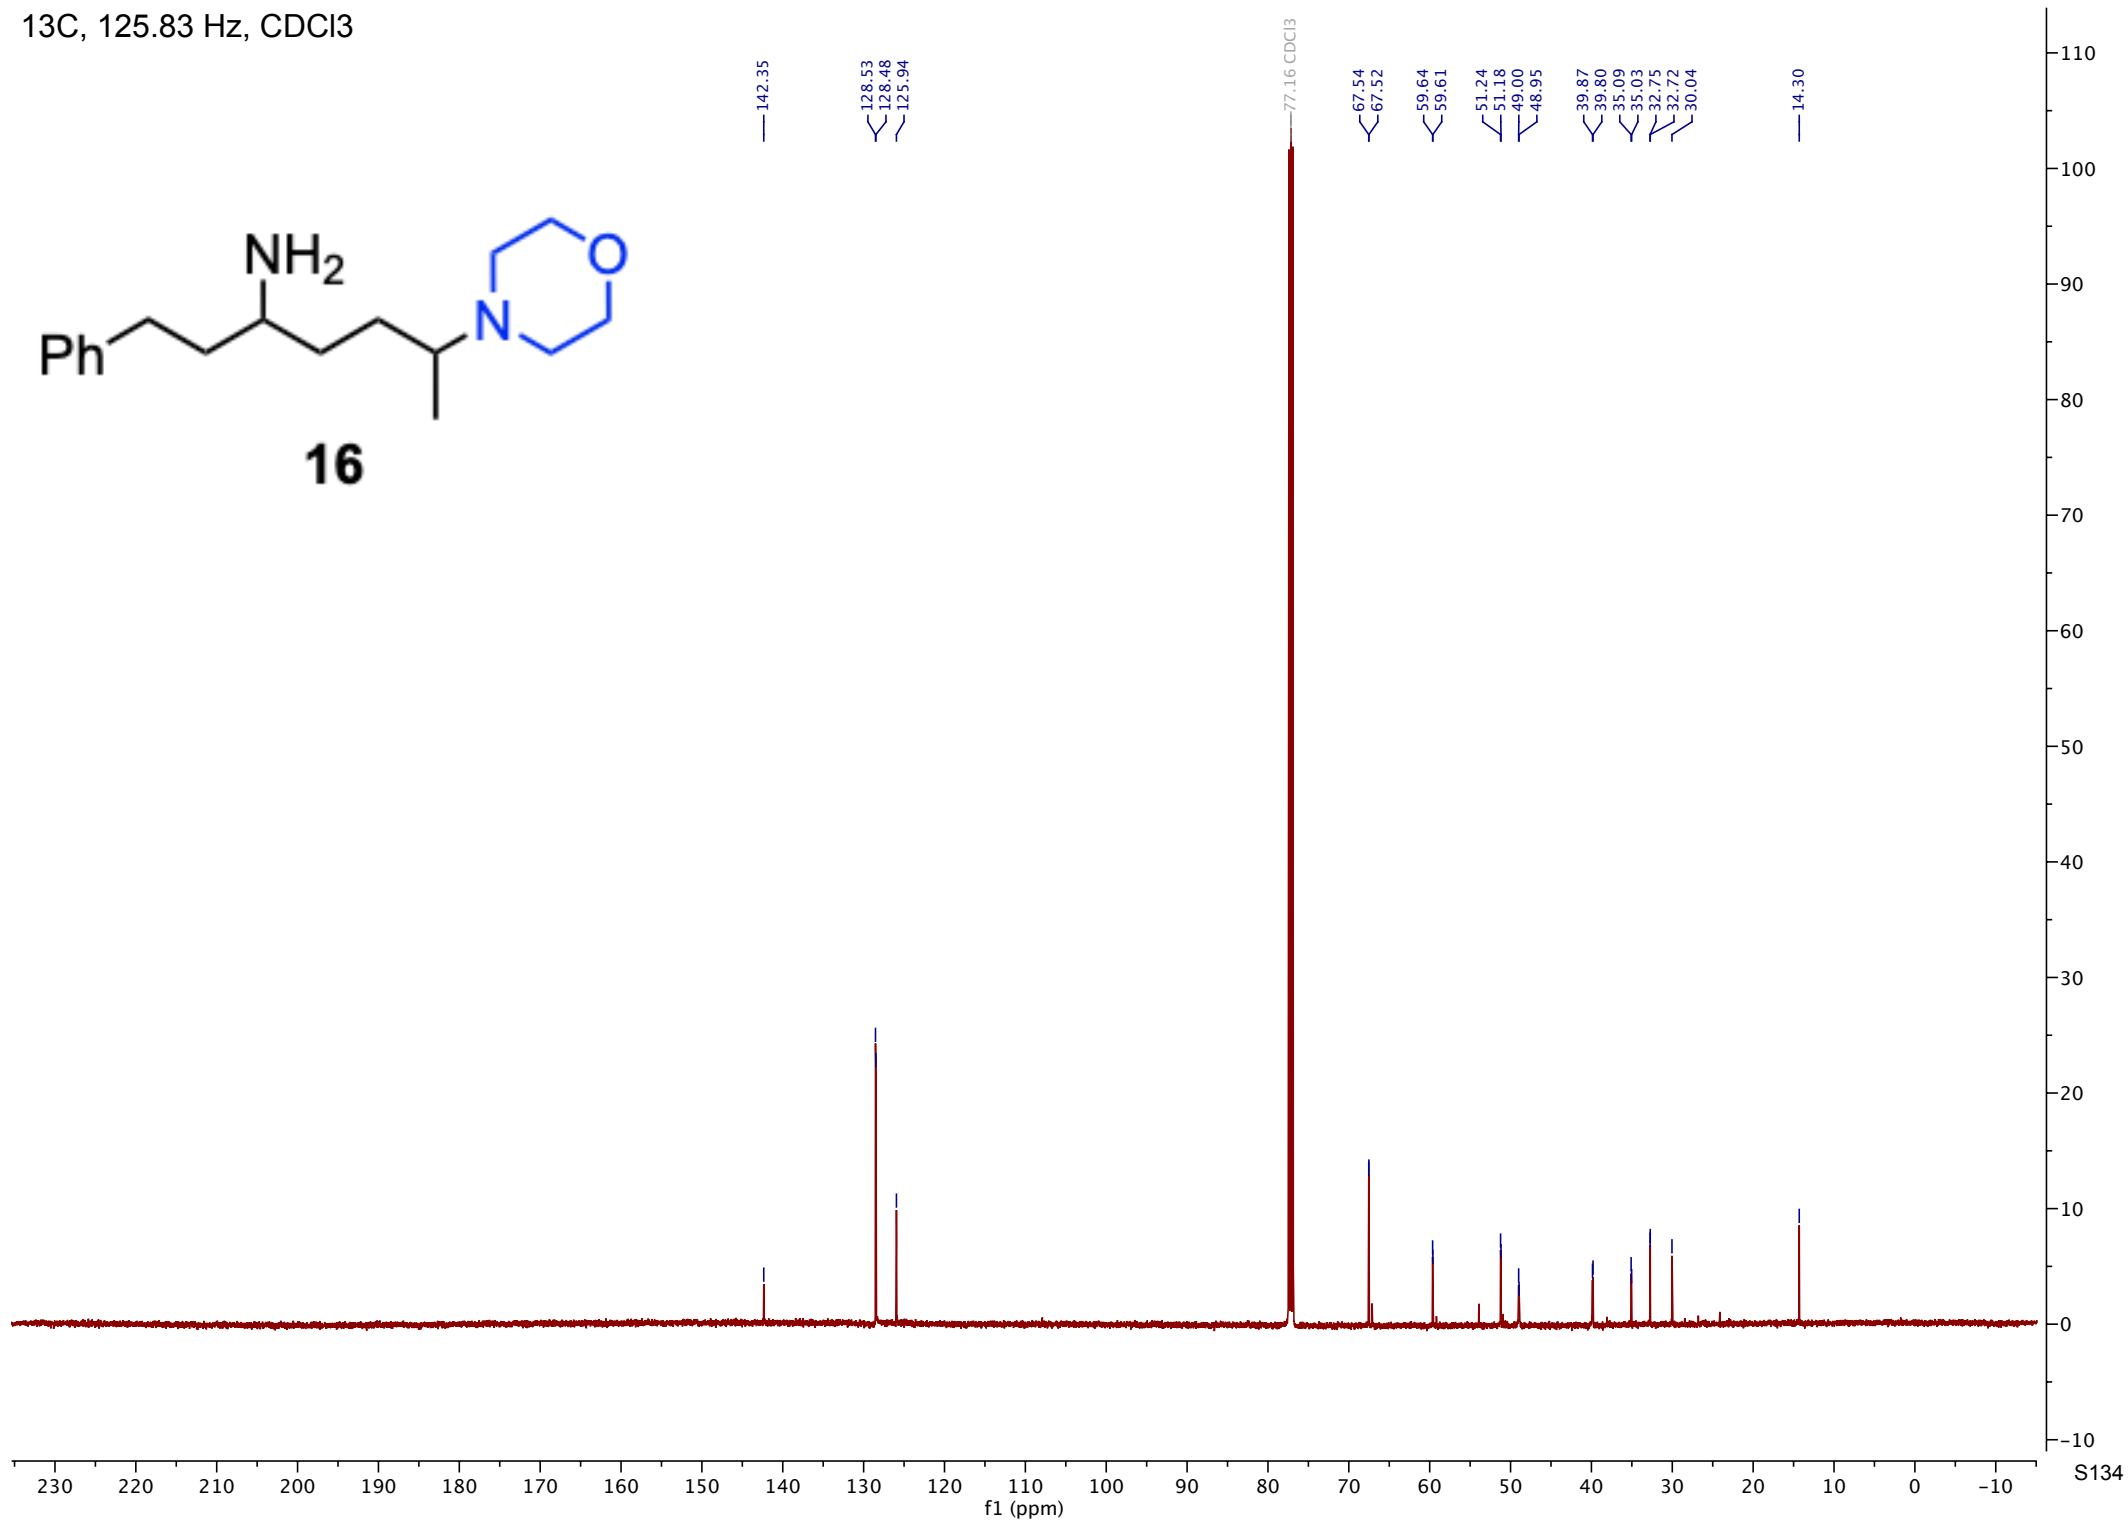

1H, 399.81 Hz, CDCl3

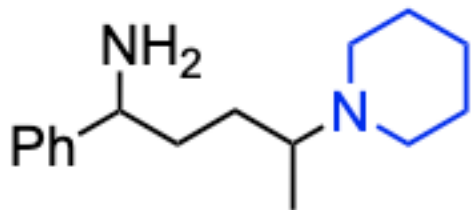

17

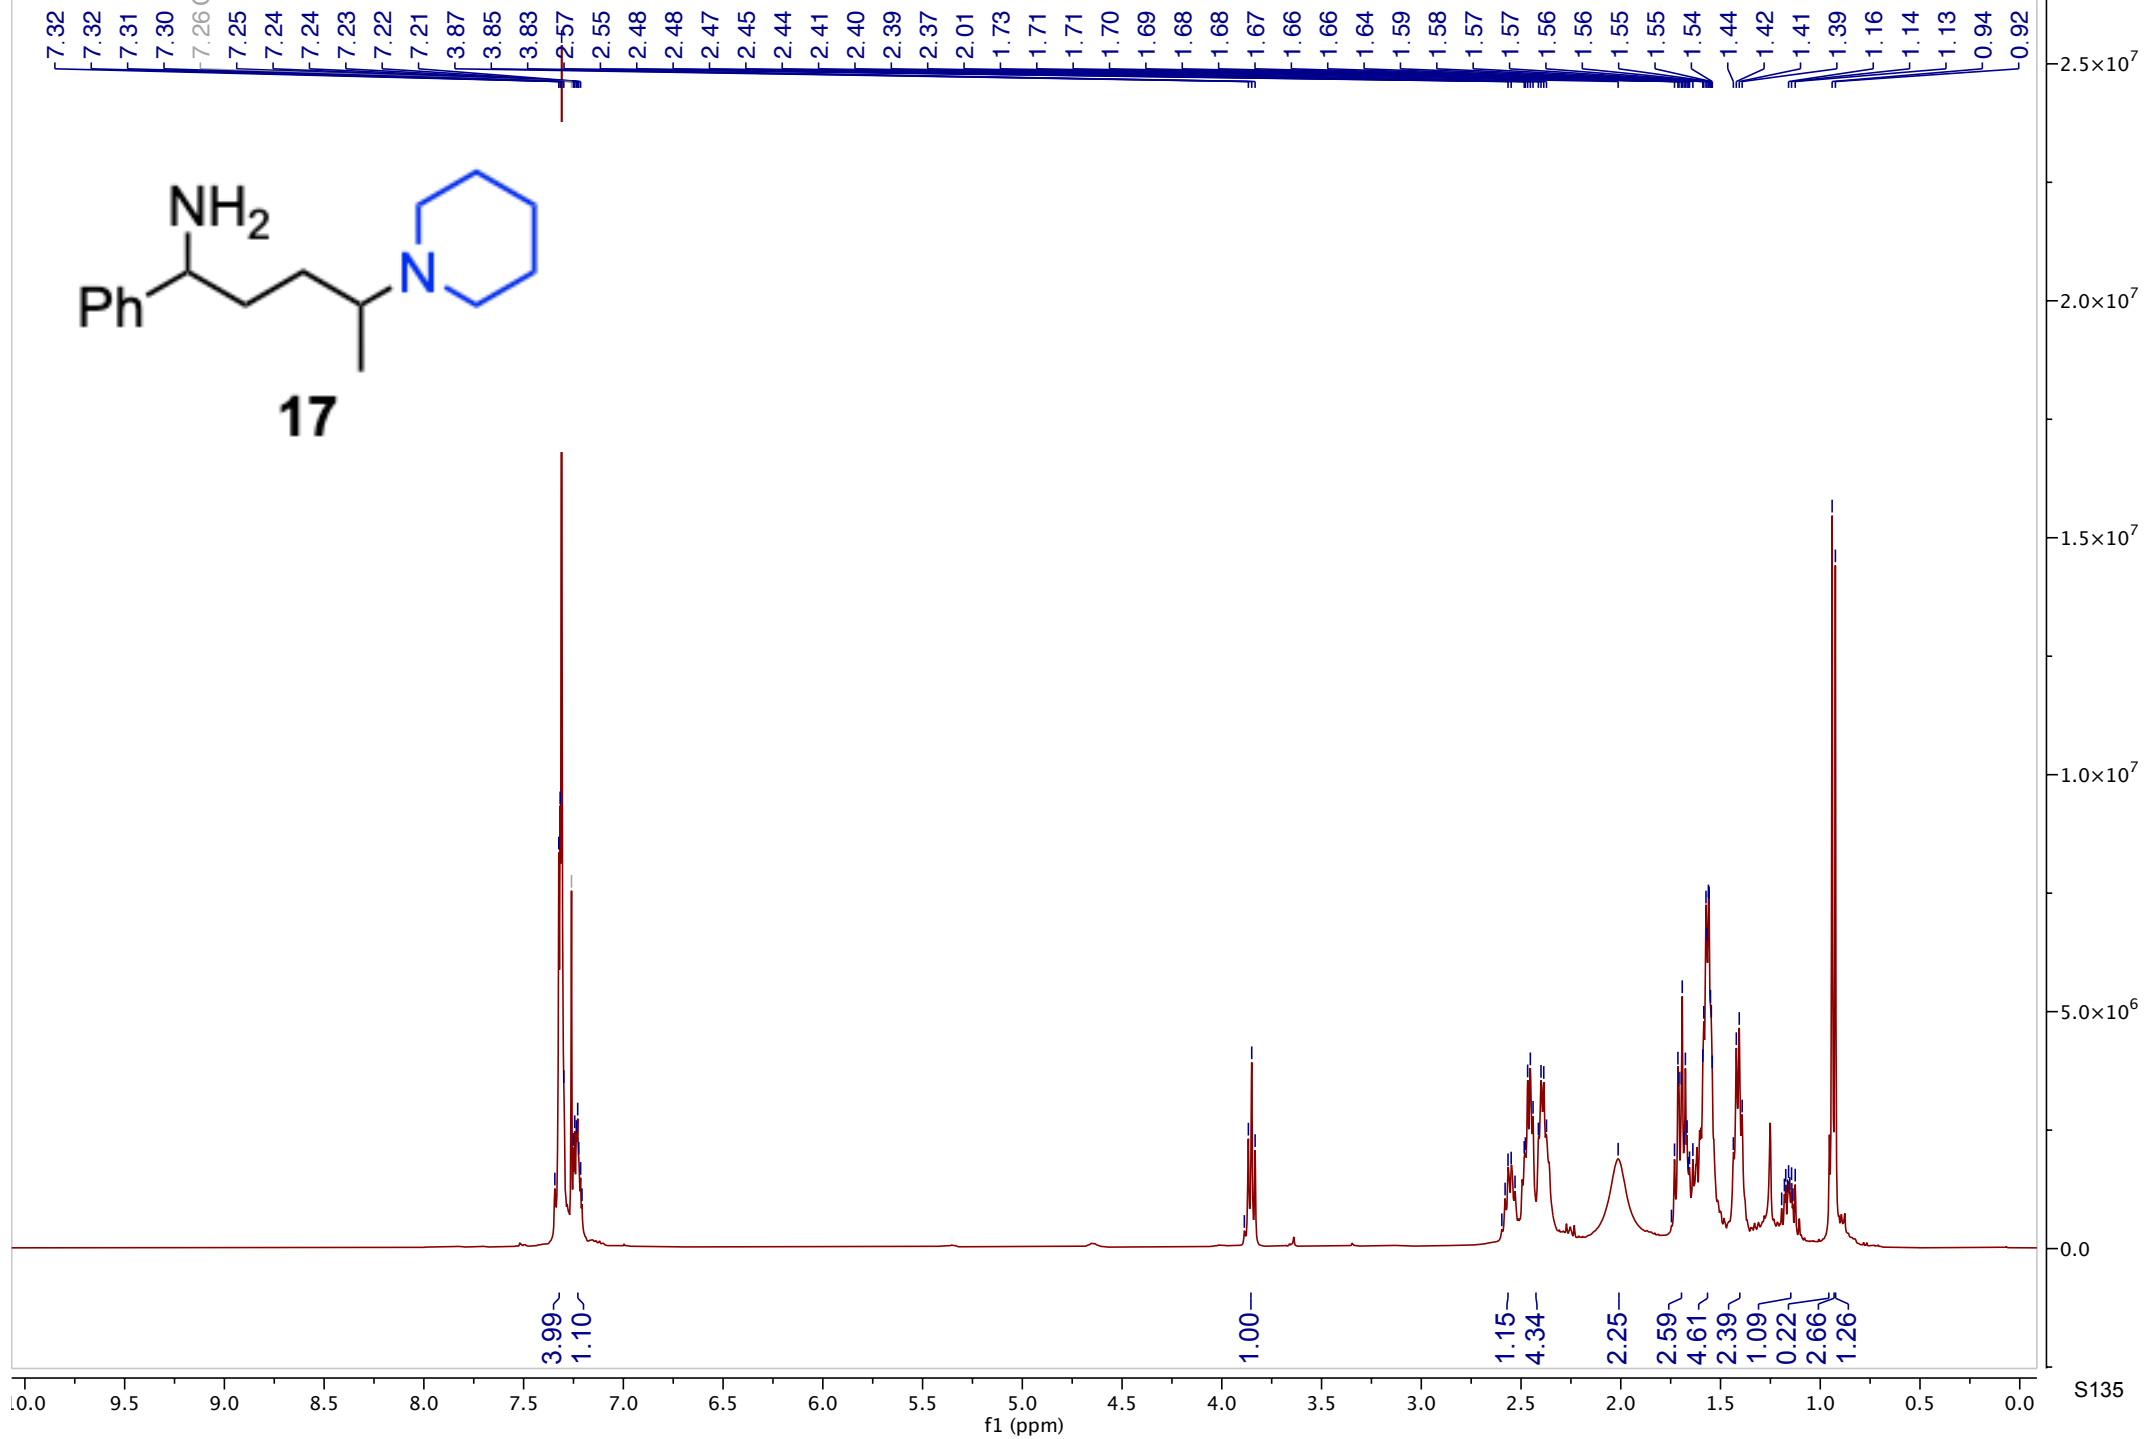

<sup>13</sup>C, 100.54 Hz, CDCl<sub>3</sub>

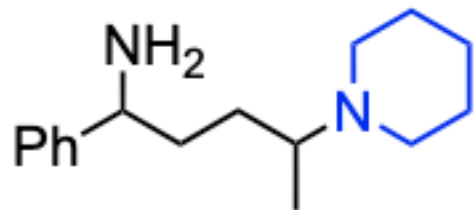

**17**

— 146.81

128.59

127.02

126.45

77.16 CDCl<sub>3</sub>

59.93

56.73

49.45

37.18

30.52

26.36

24.93

— 14.06

210 200 190 180 170 160 150 140 130 120 110 100 90 80 70 60 50 40 30 20 10 0 -10

f1 (ppm)

S136



1H, 500.11 Hz, CDCl3

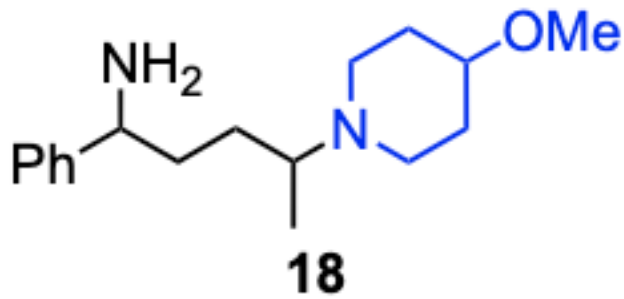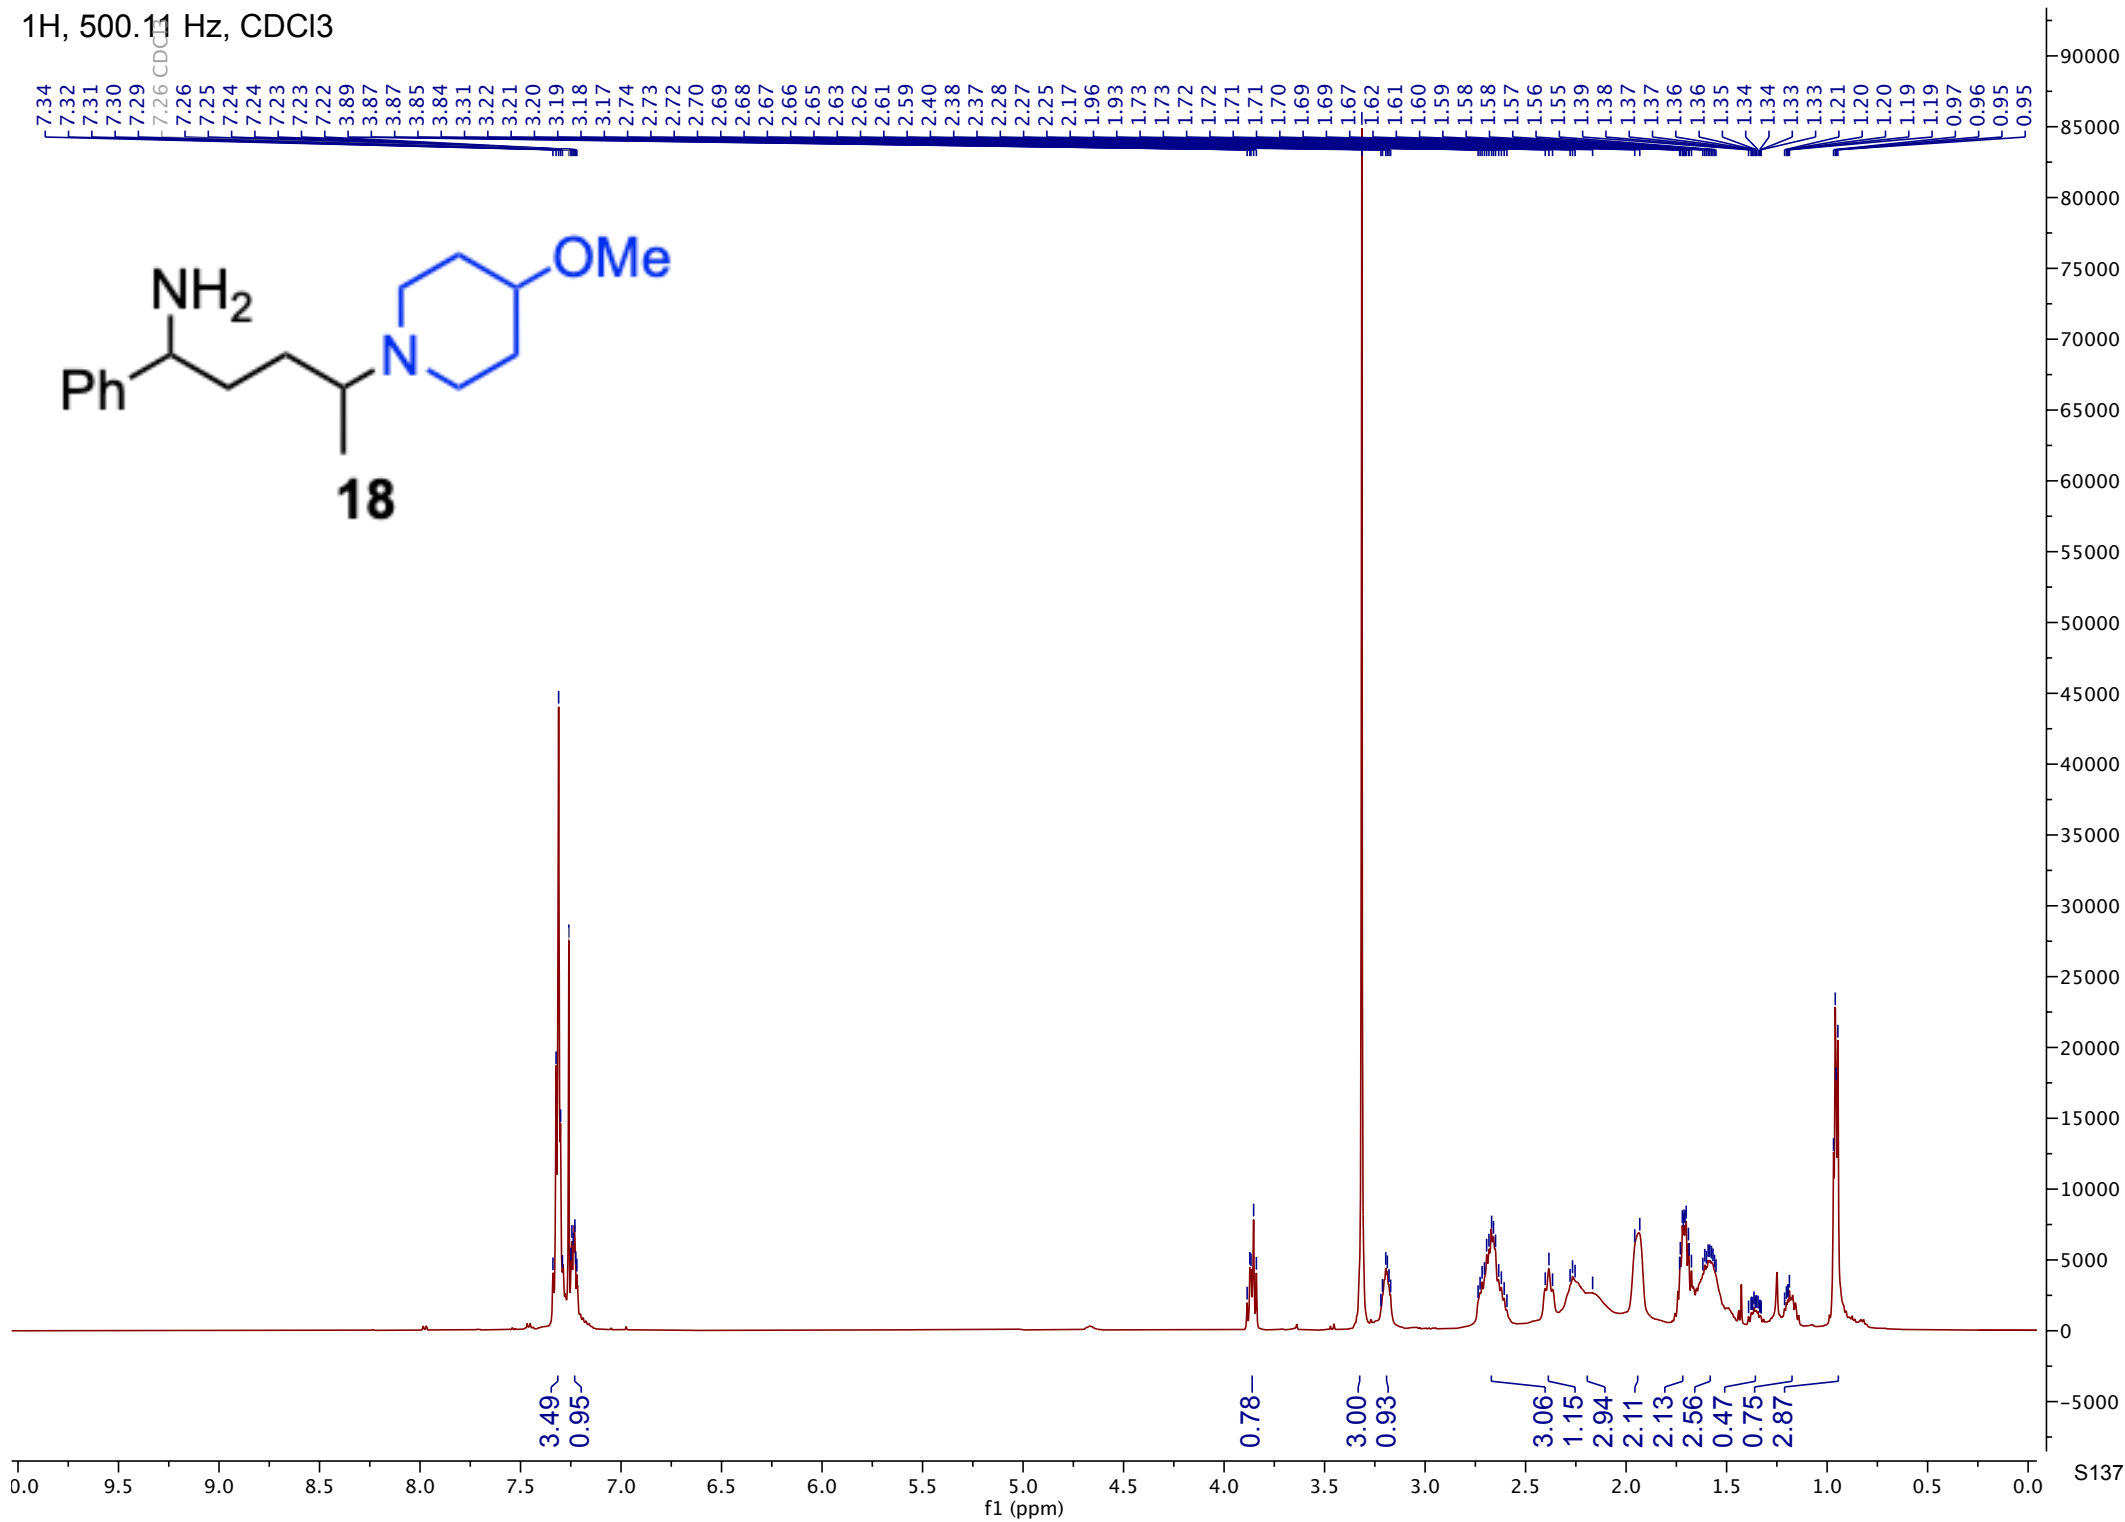

$^{13}\text{C}$ , 100.54 Hz,  $\text{CDCl}_3$

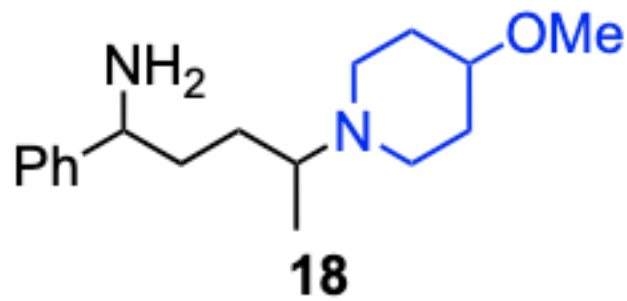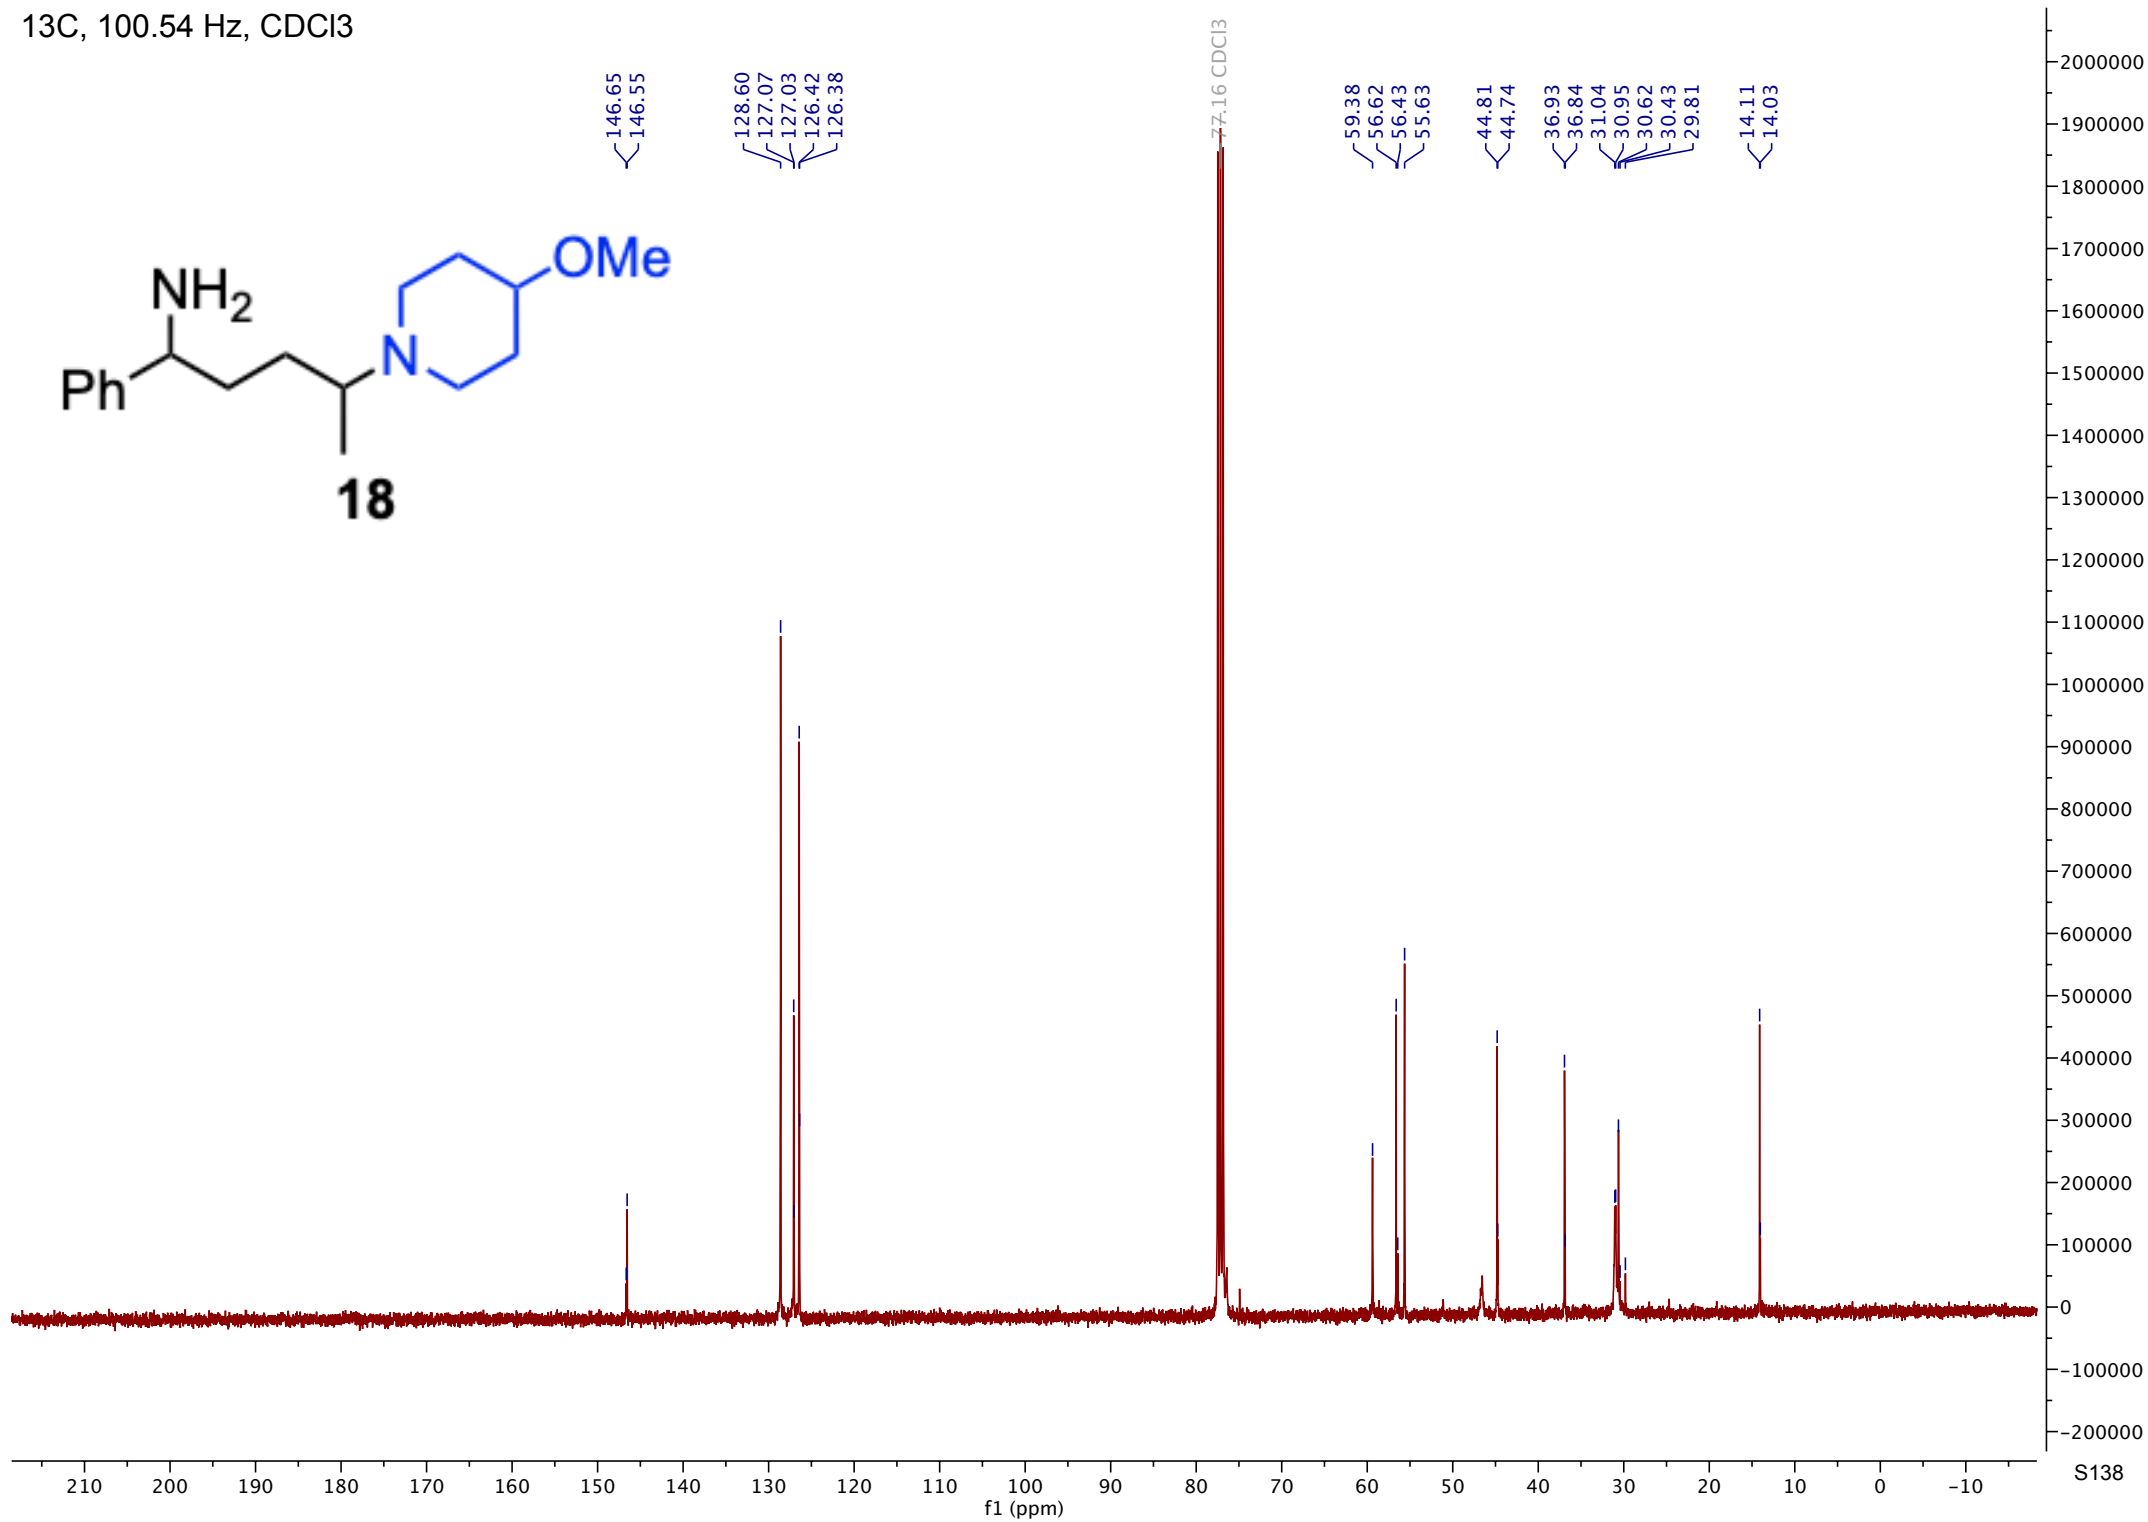

<sup>1</sup>H, 500.18 Hz, CDCl<sub>3</sub>

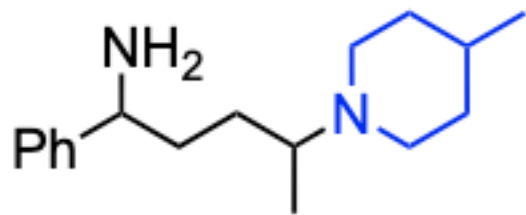

**19**

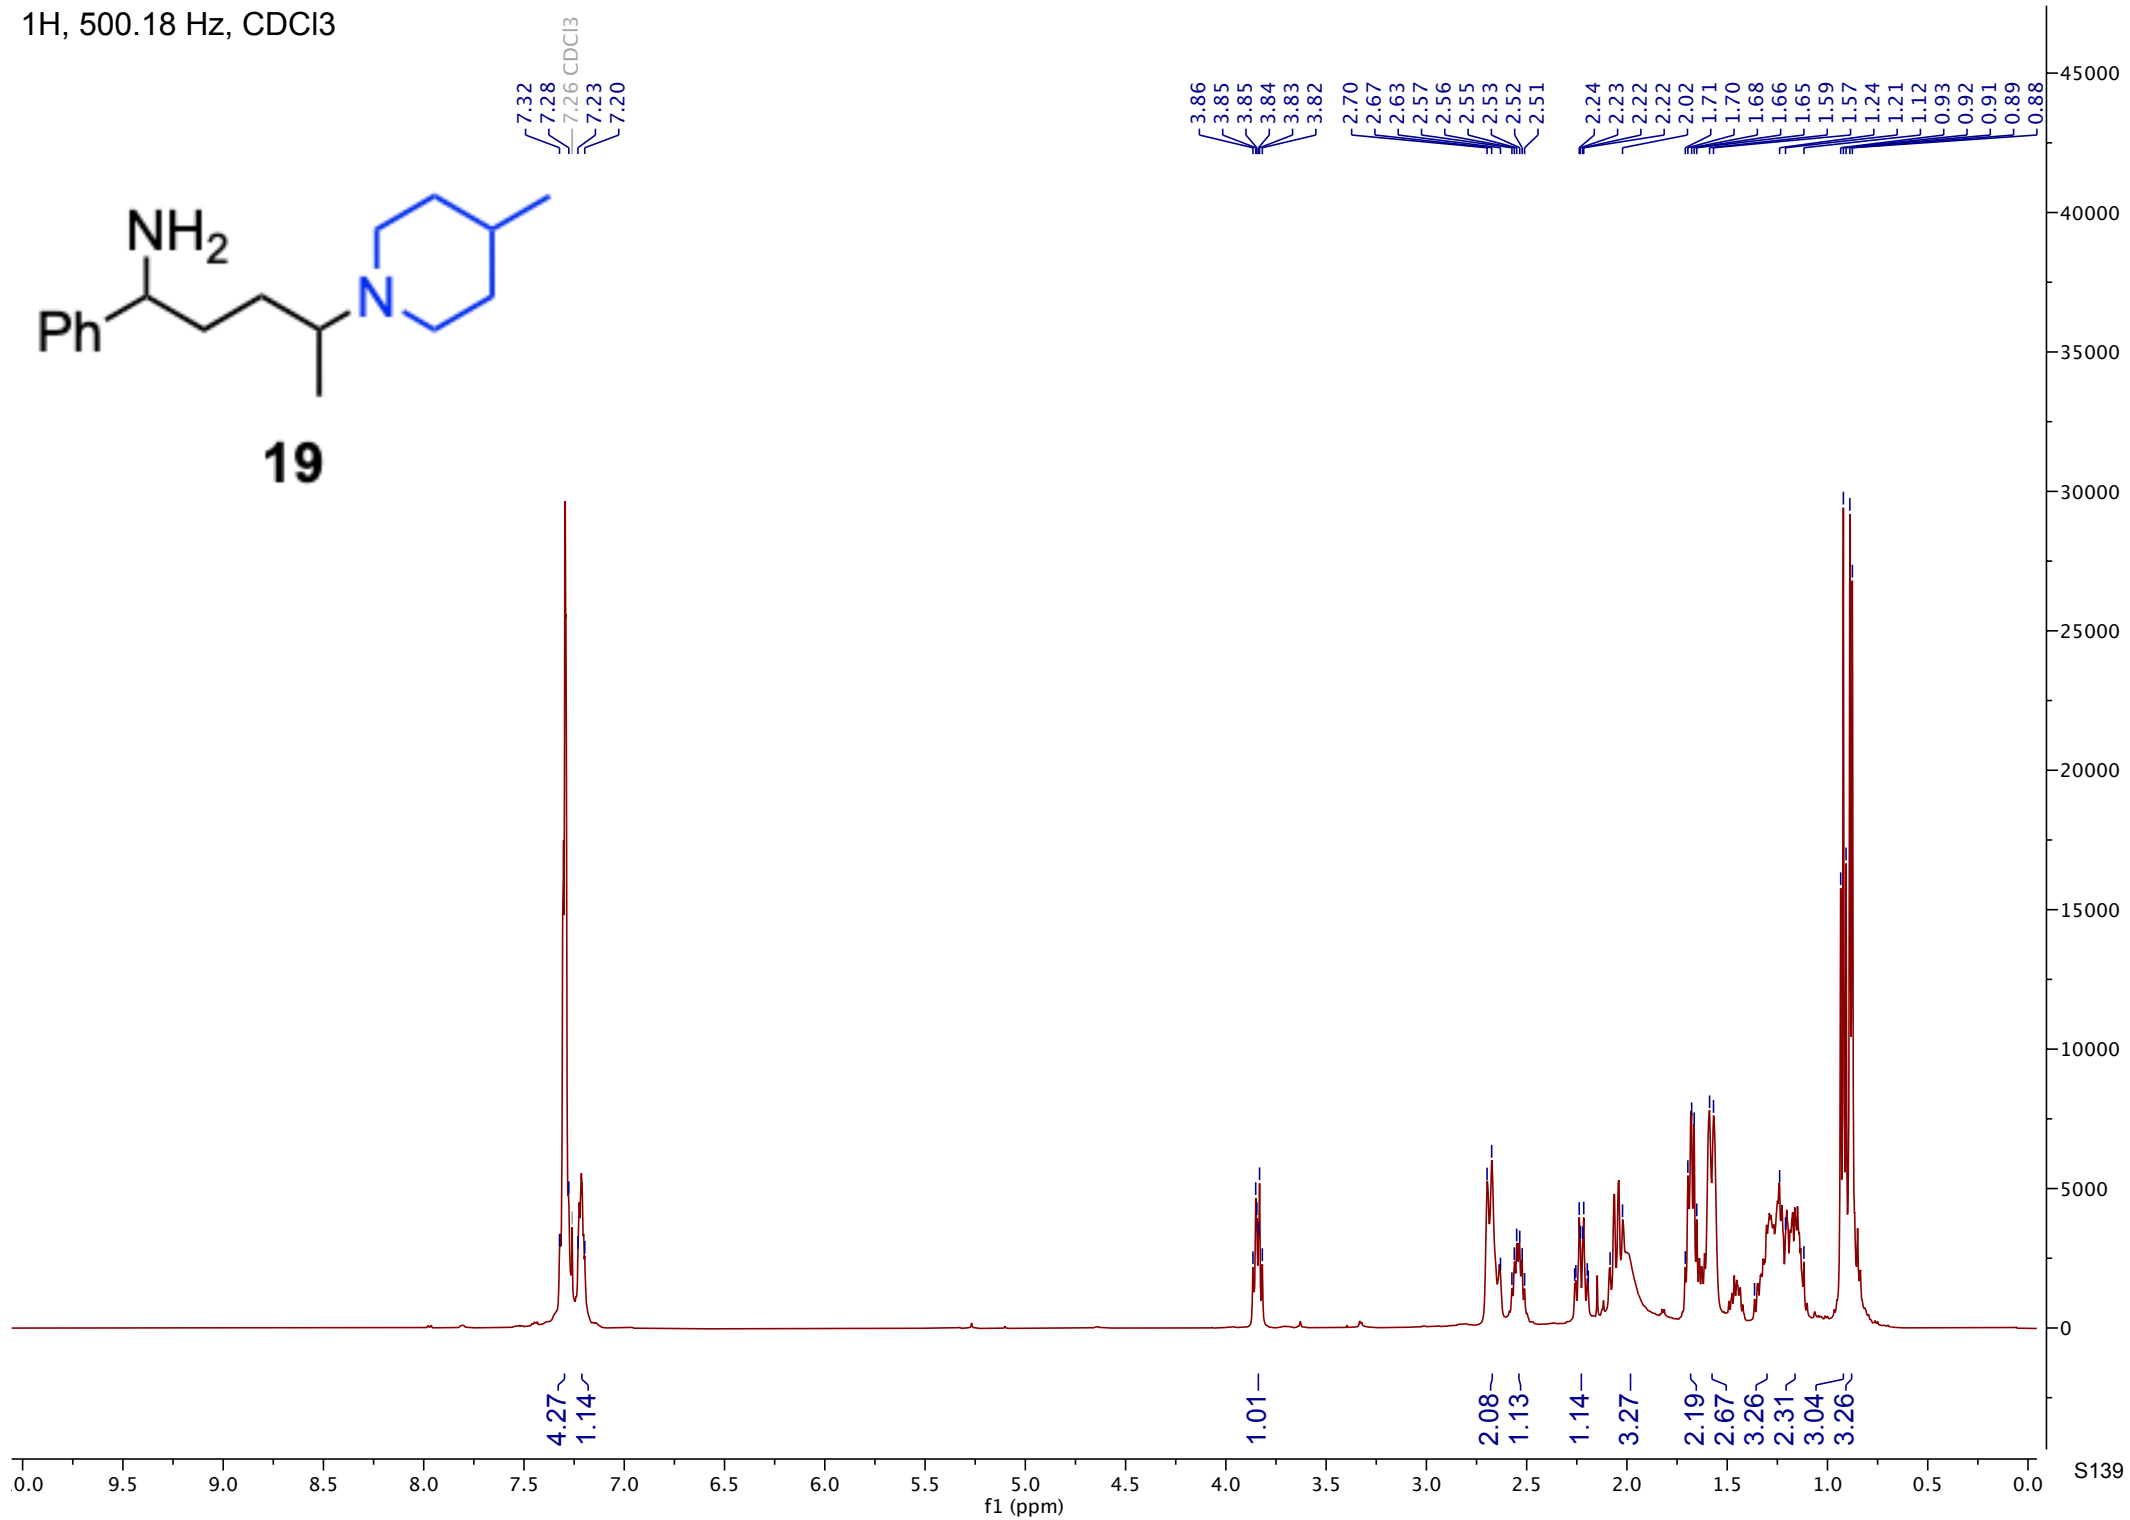

$^{13}\text{C}$ , 125.78 Hz,  $\text{CDCl}_3$



**19**

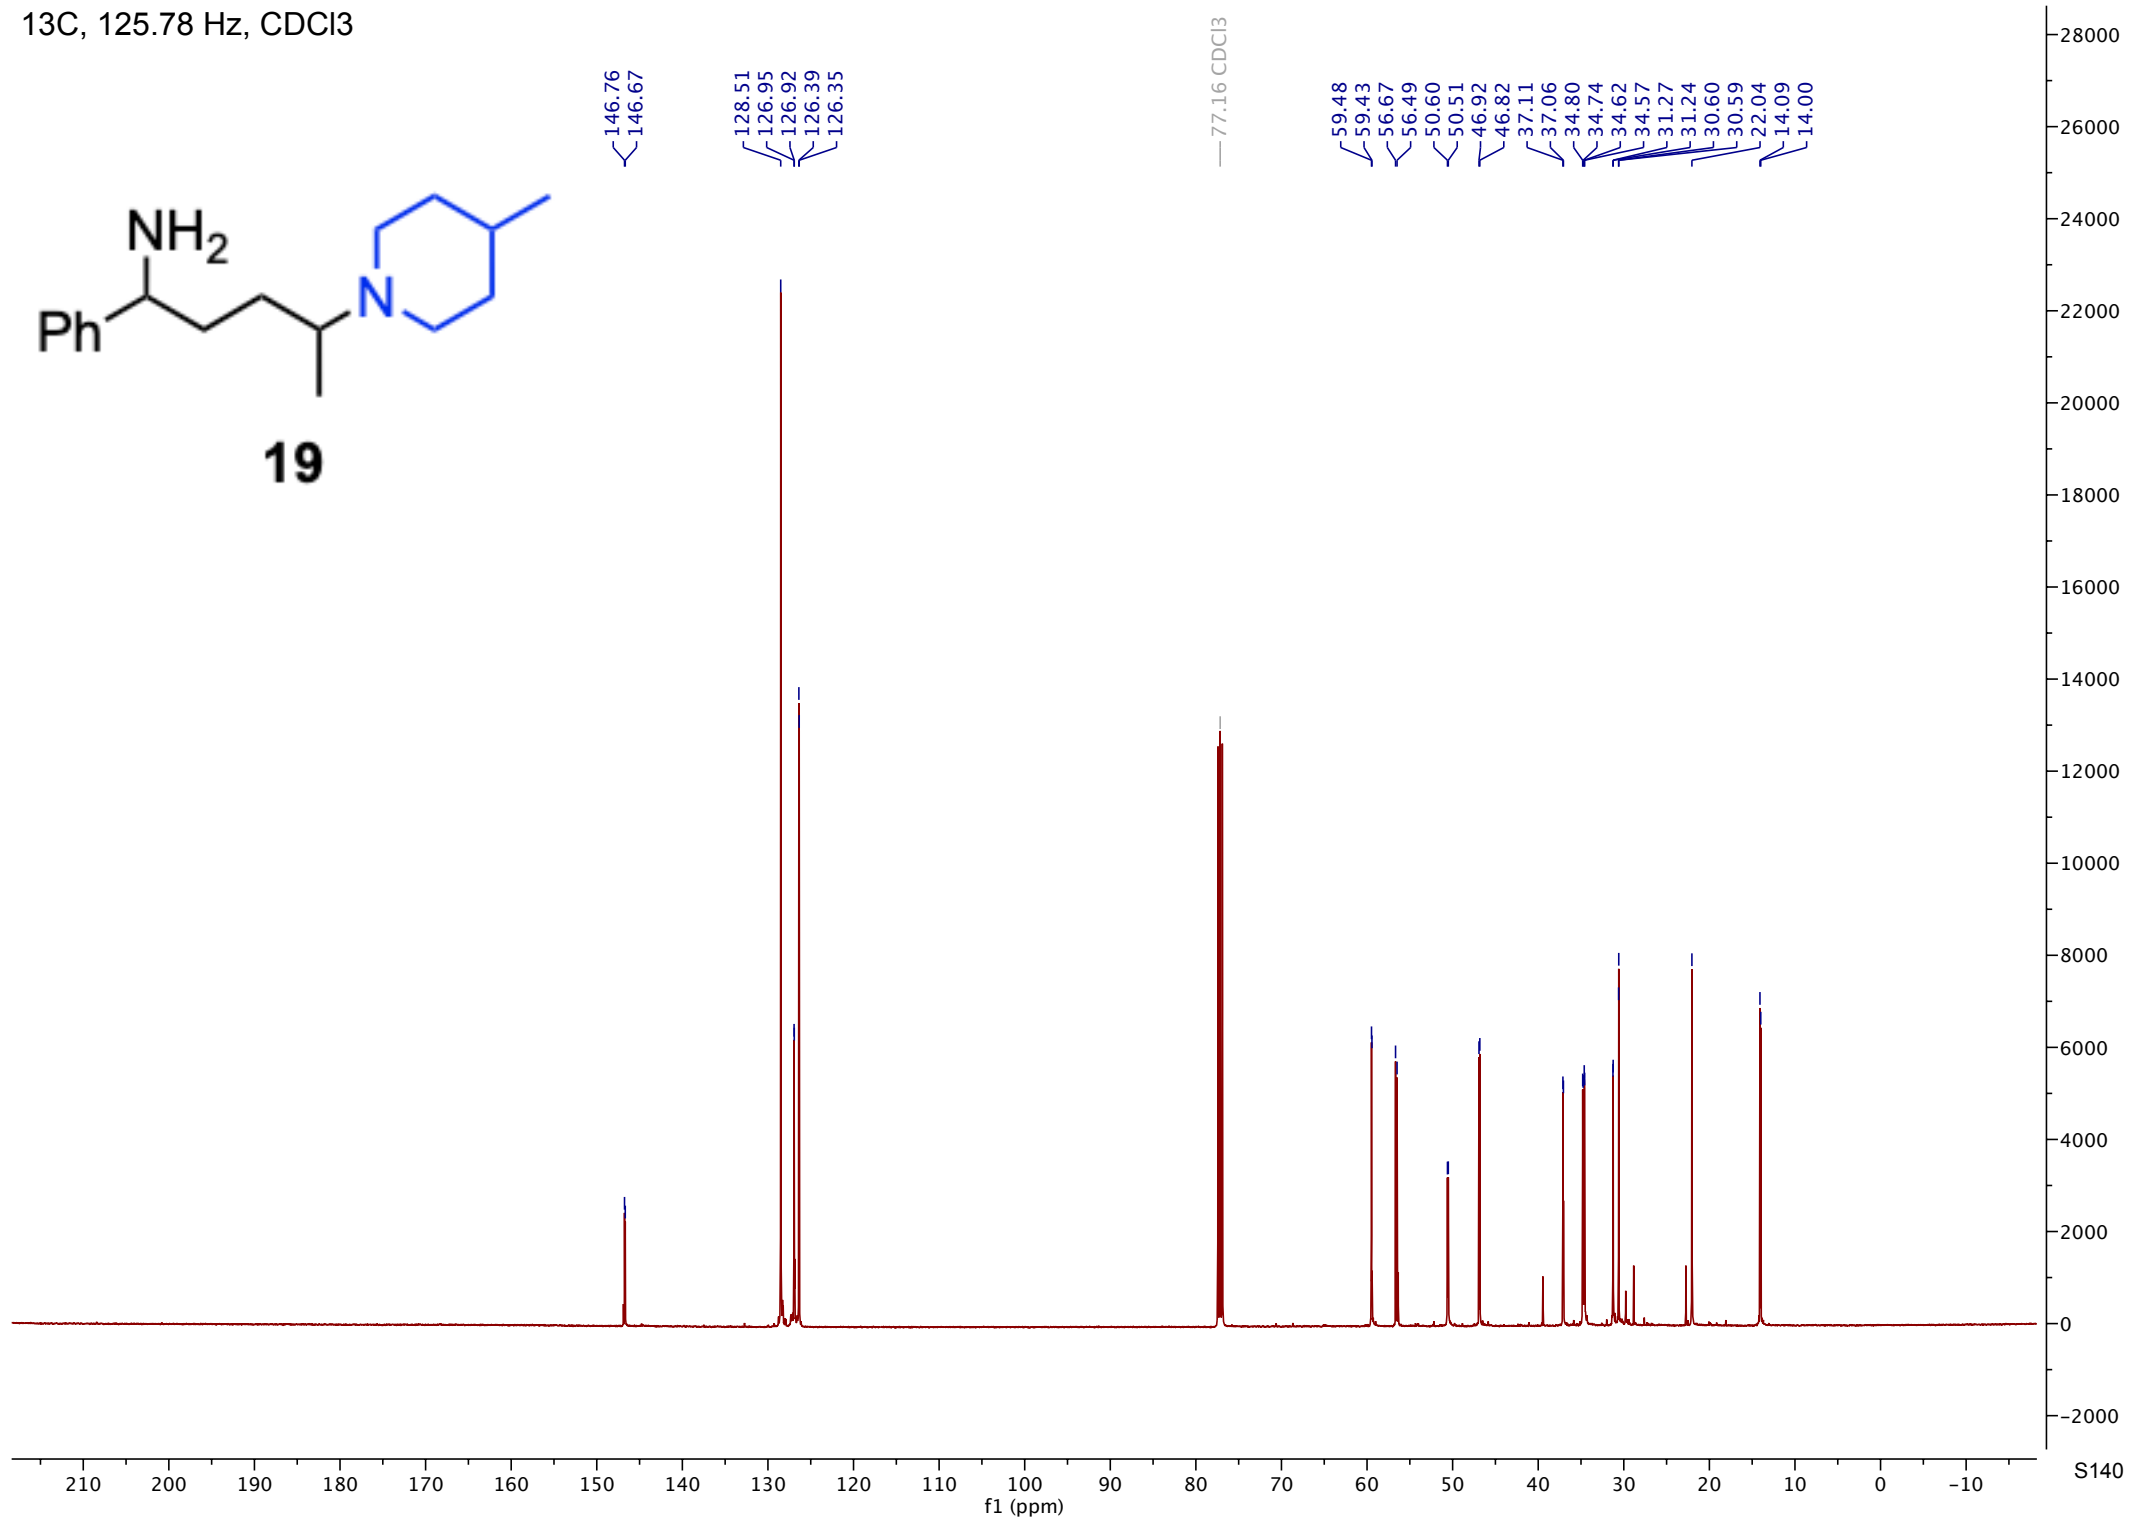

1H, 399.95 Hz, cdcl3

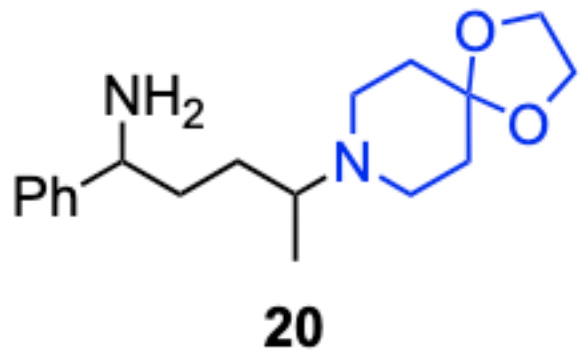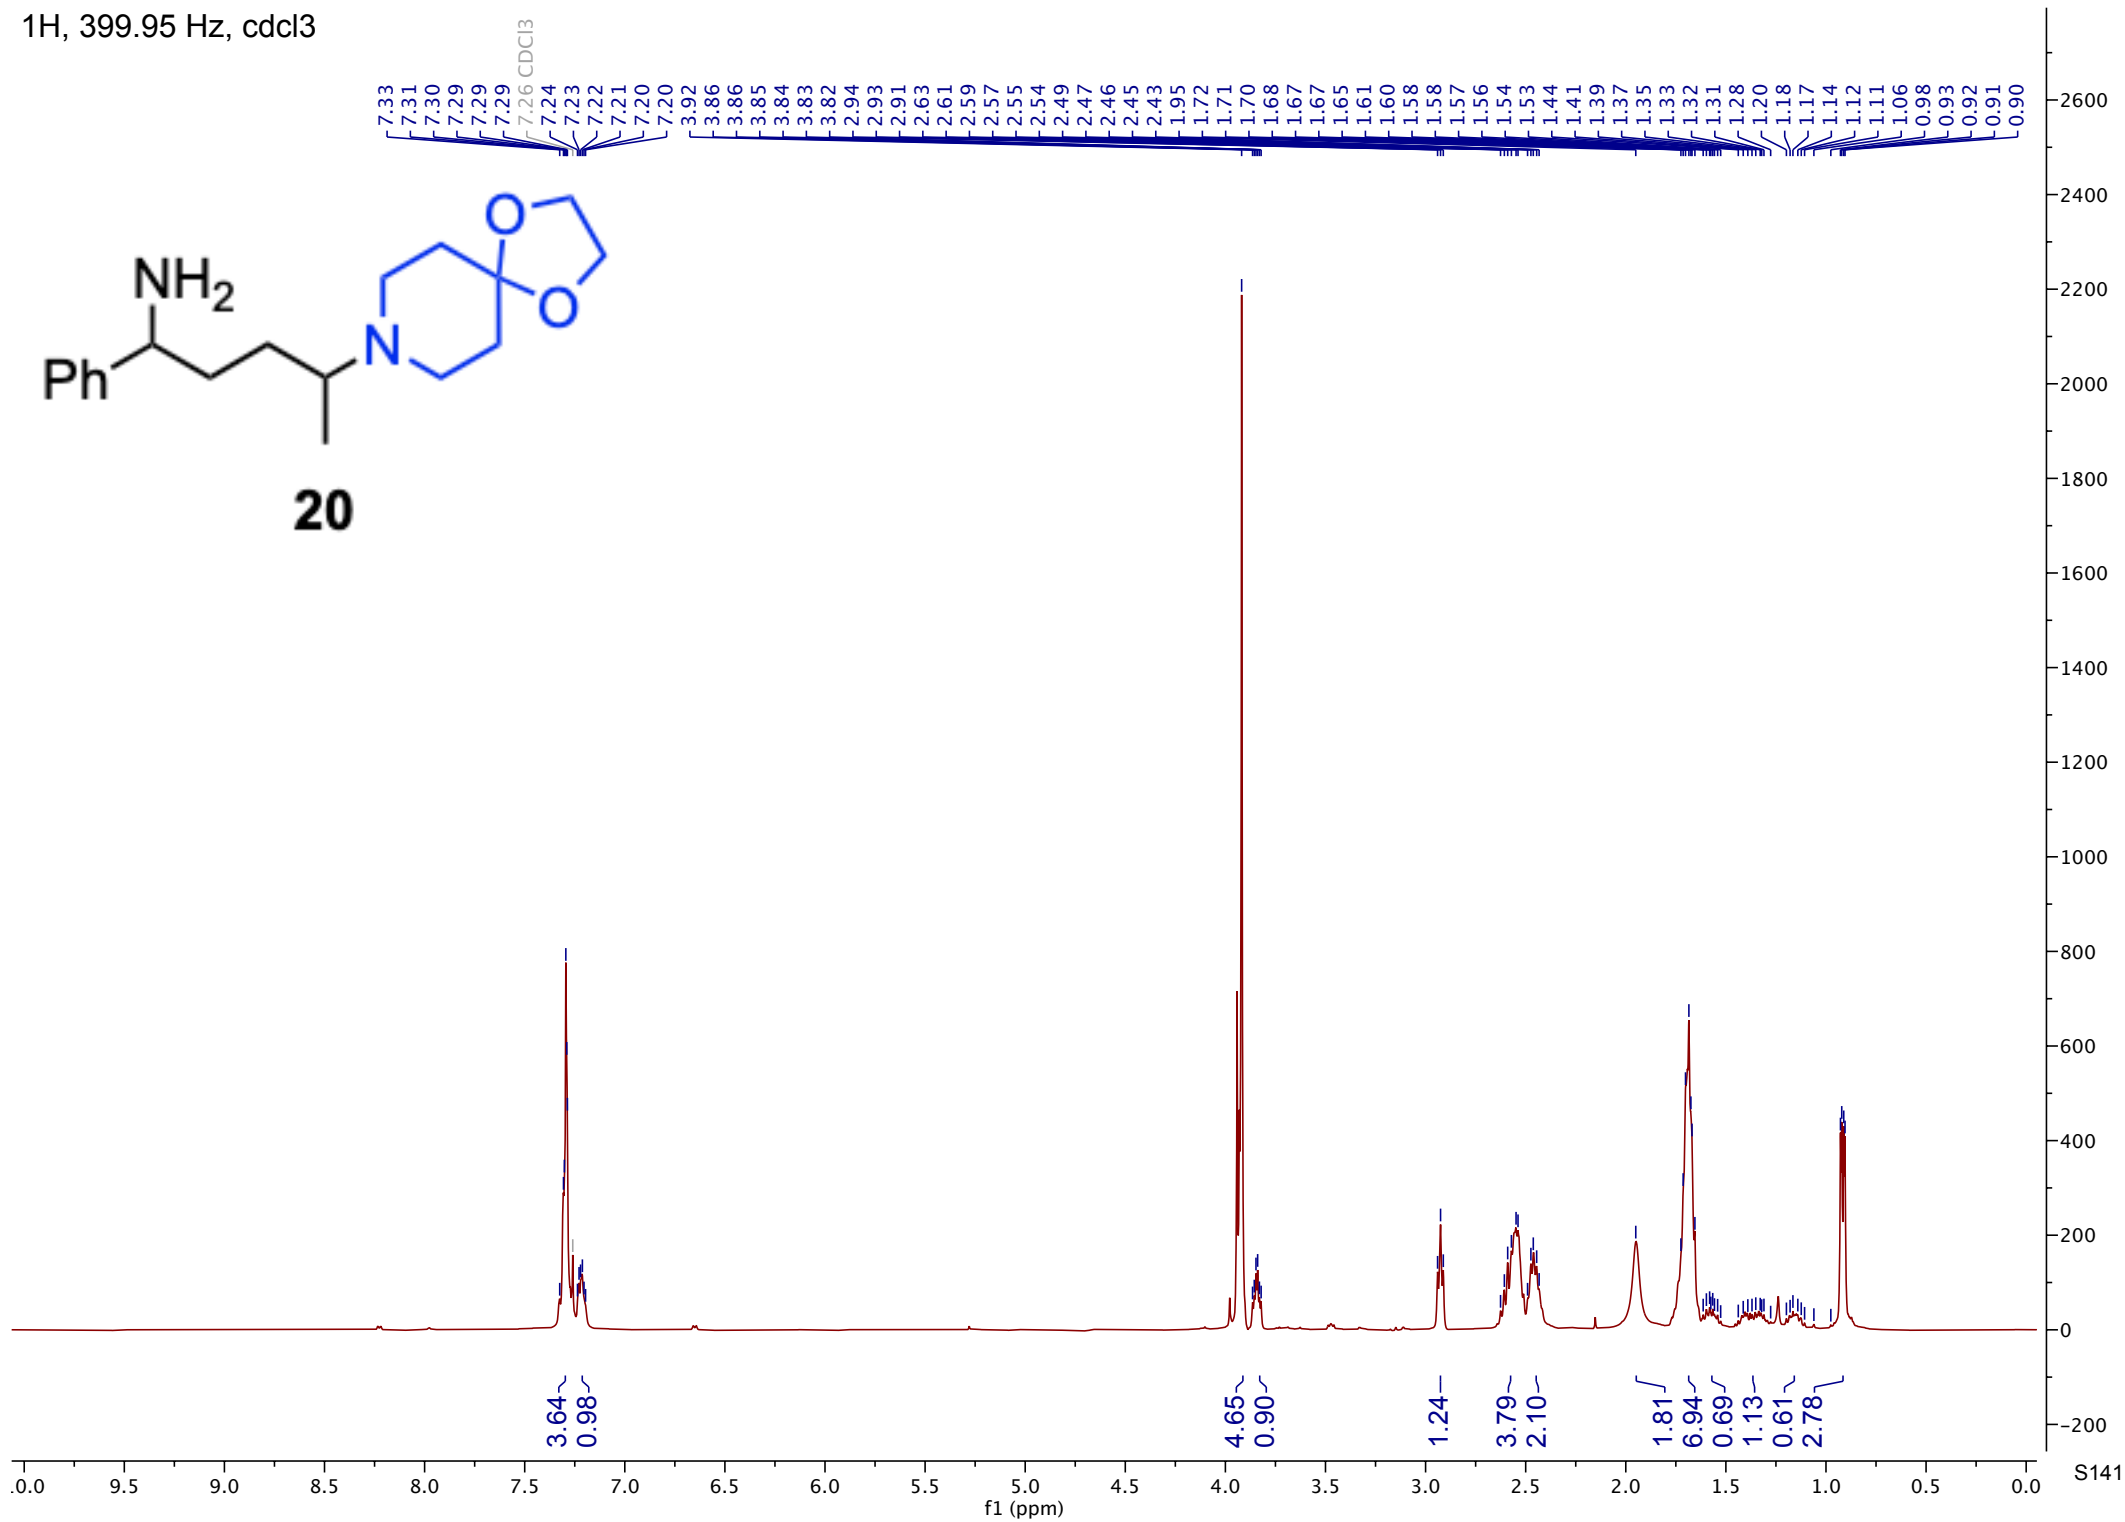

$^{13}\text{C}$ , 100.58 Hz,  $\text{cdCl}_3$

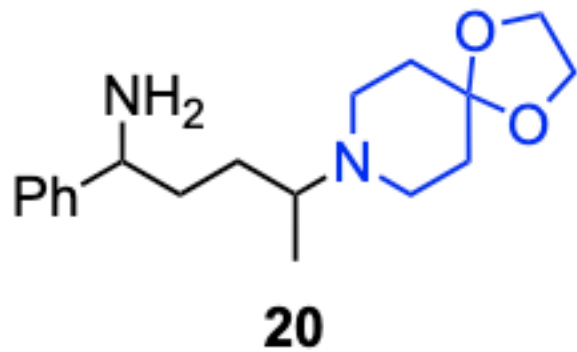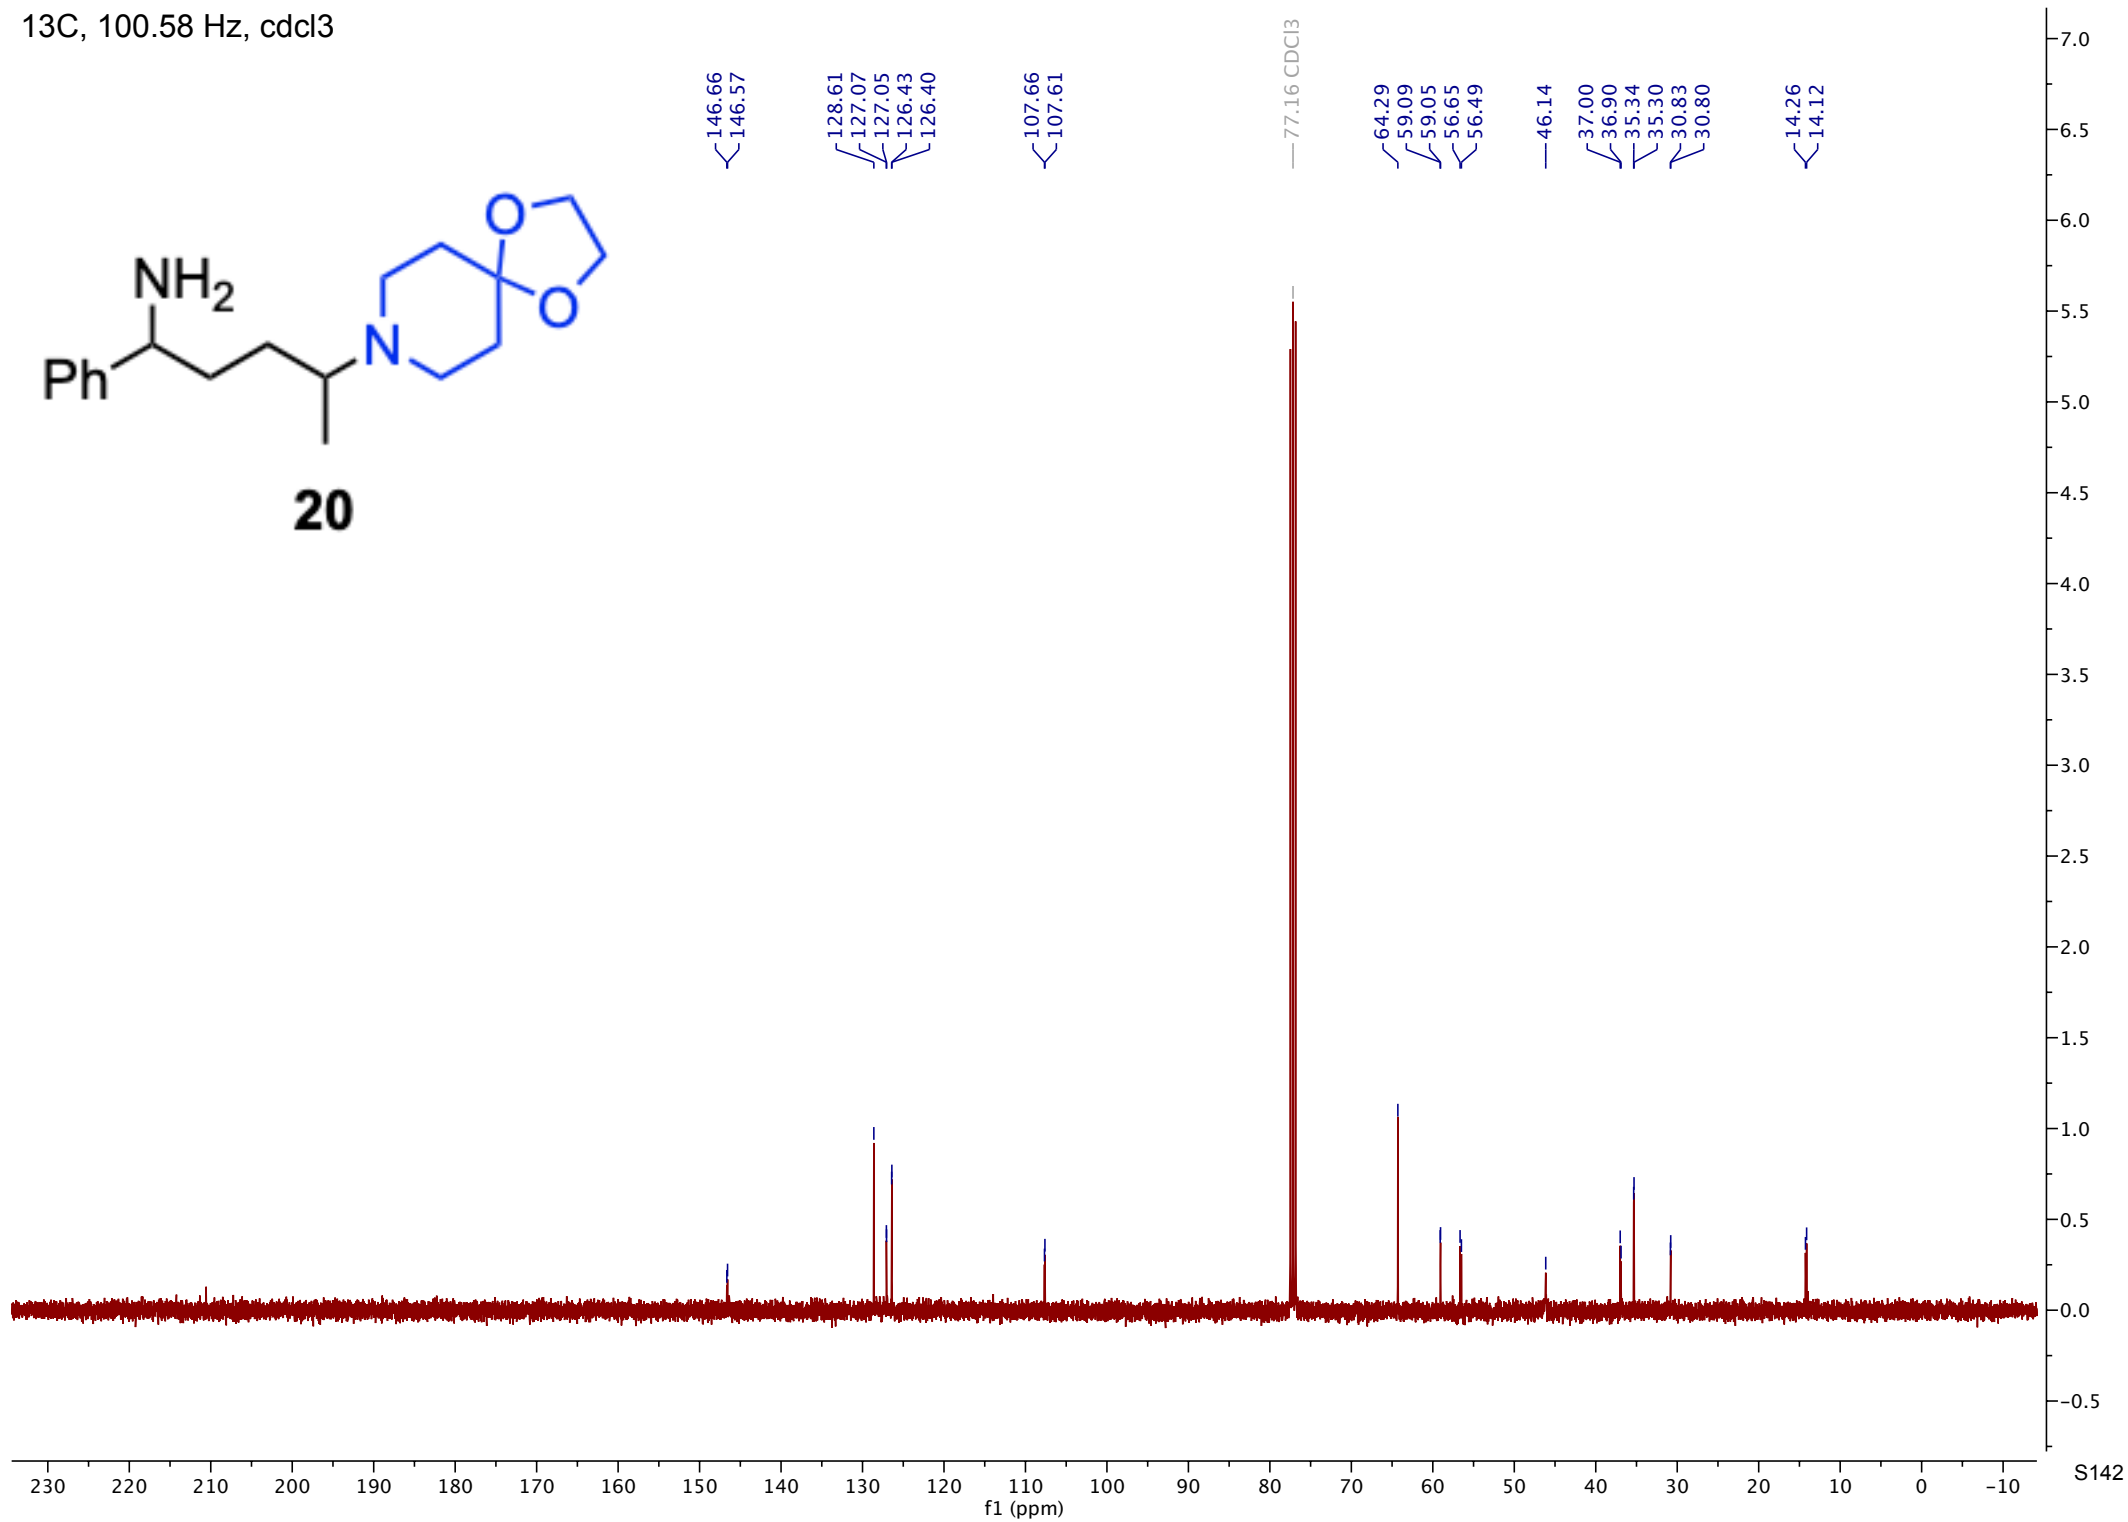

1H, 500.18 Hz, CDCl3

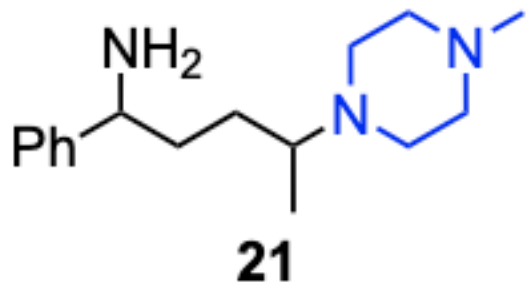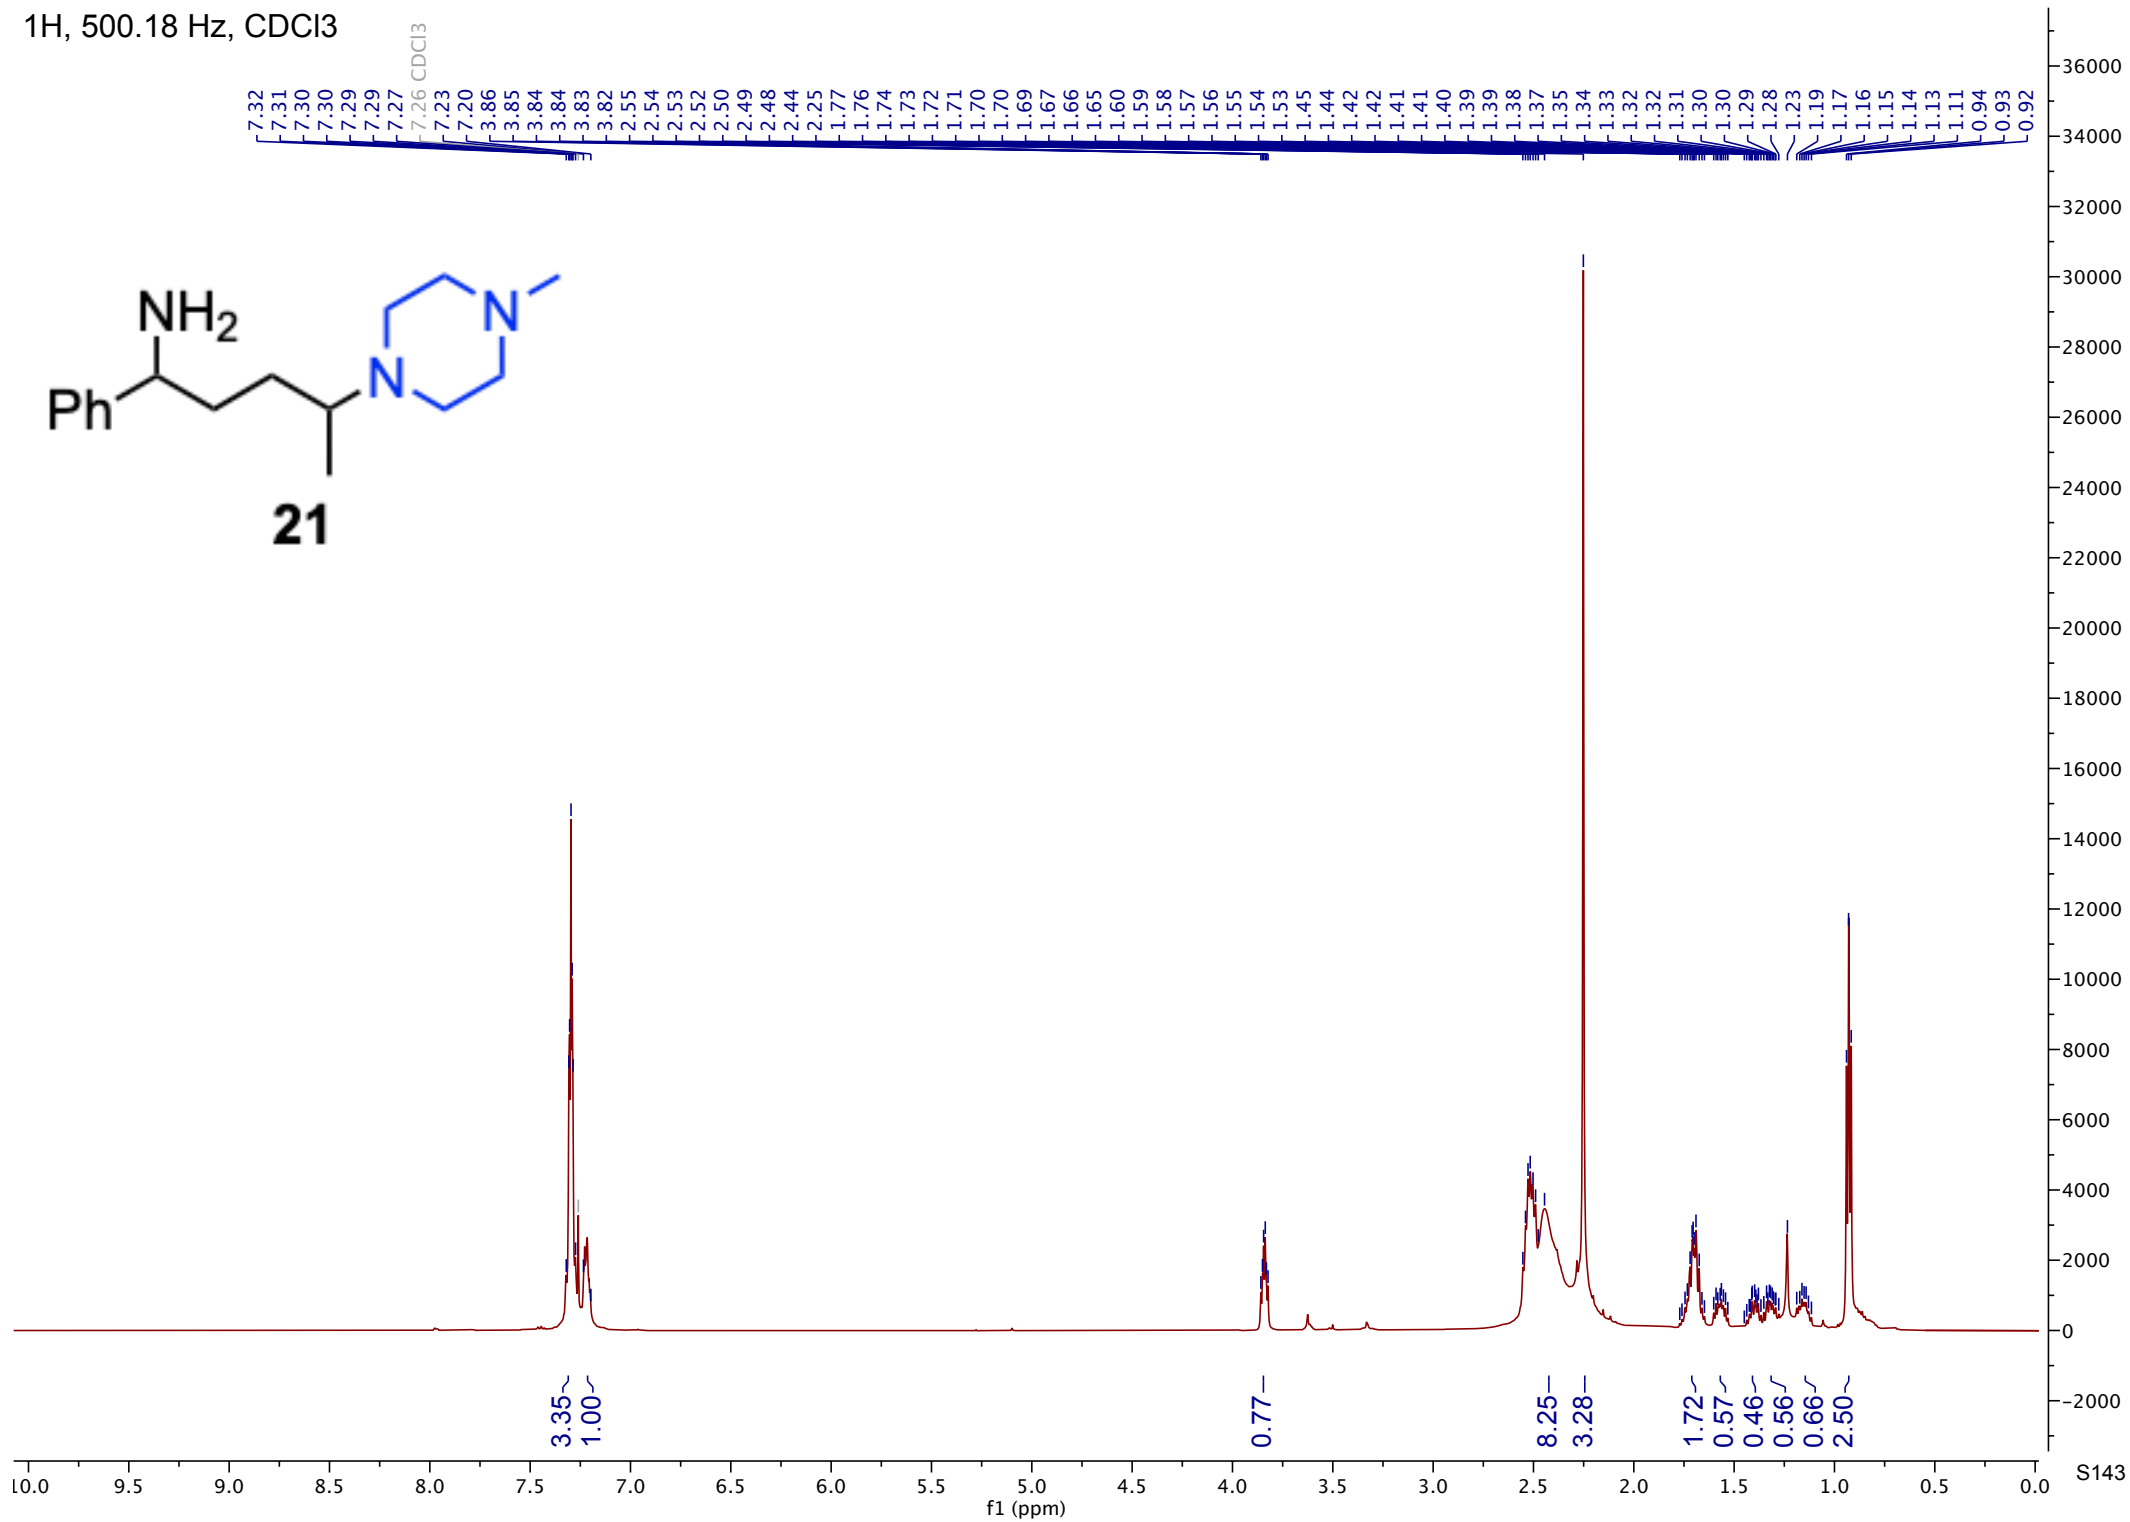

$^{13}\text{C}$ , 125.78 Hz,  $\text{CDCl}_3$

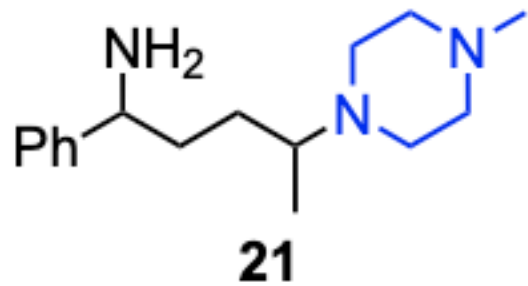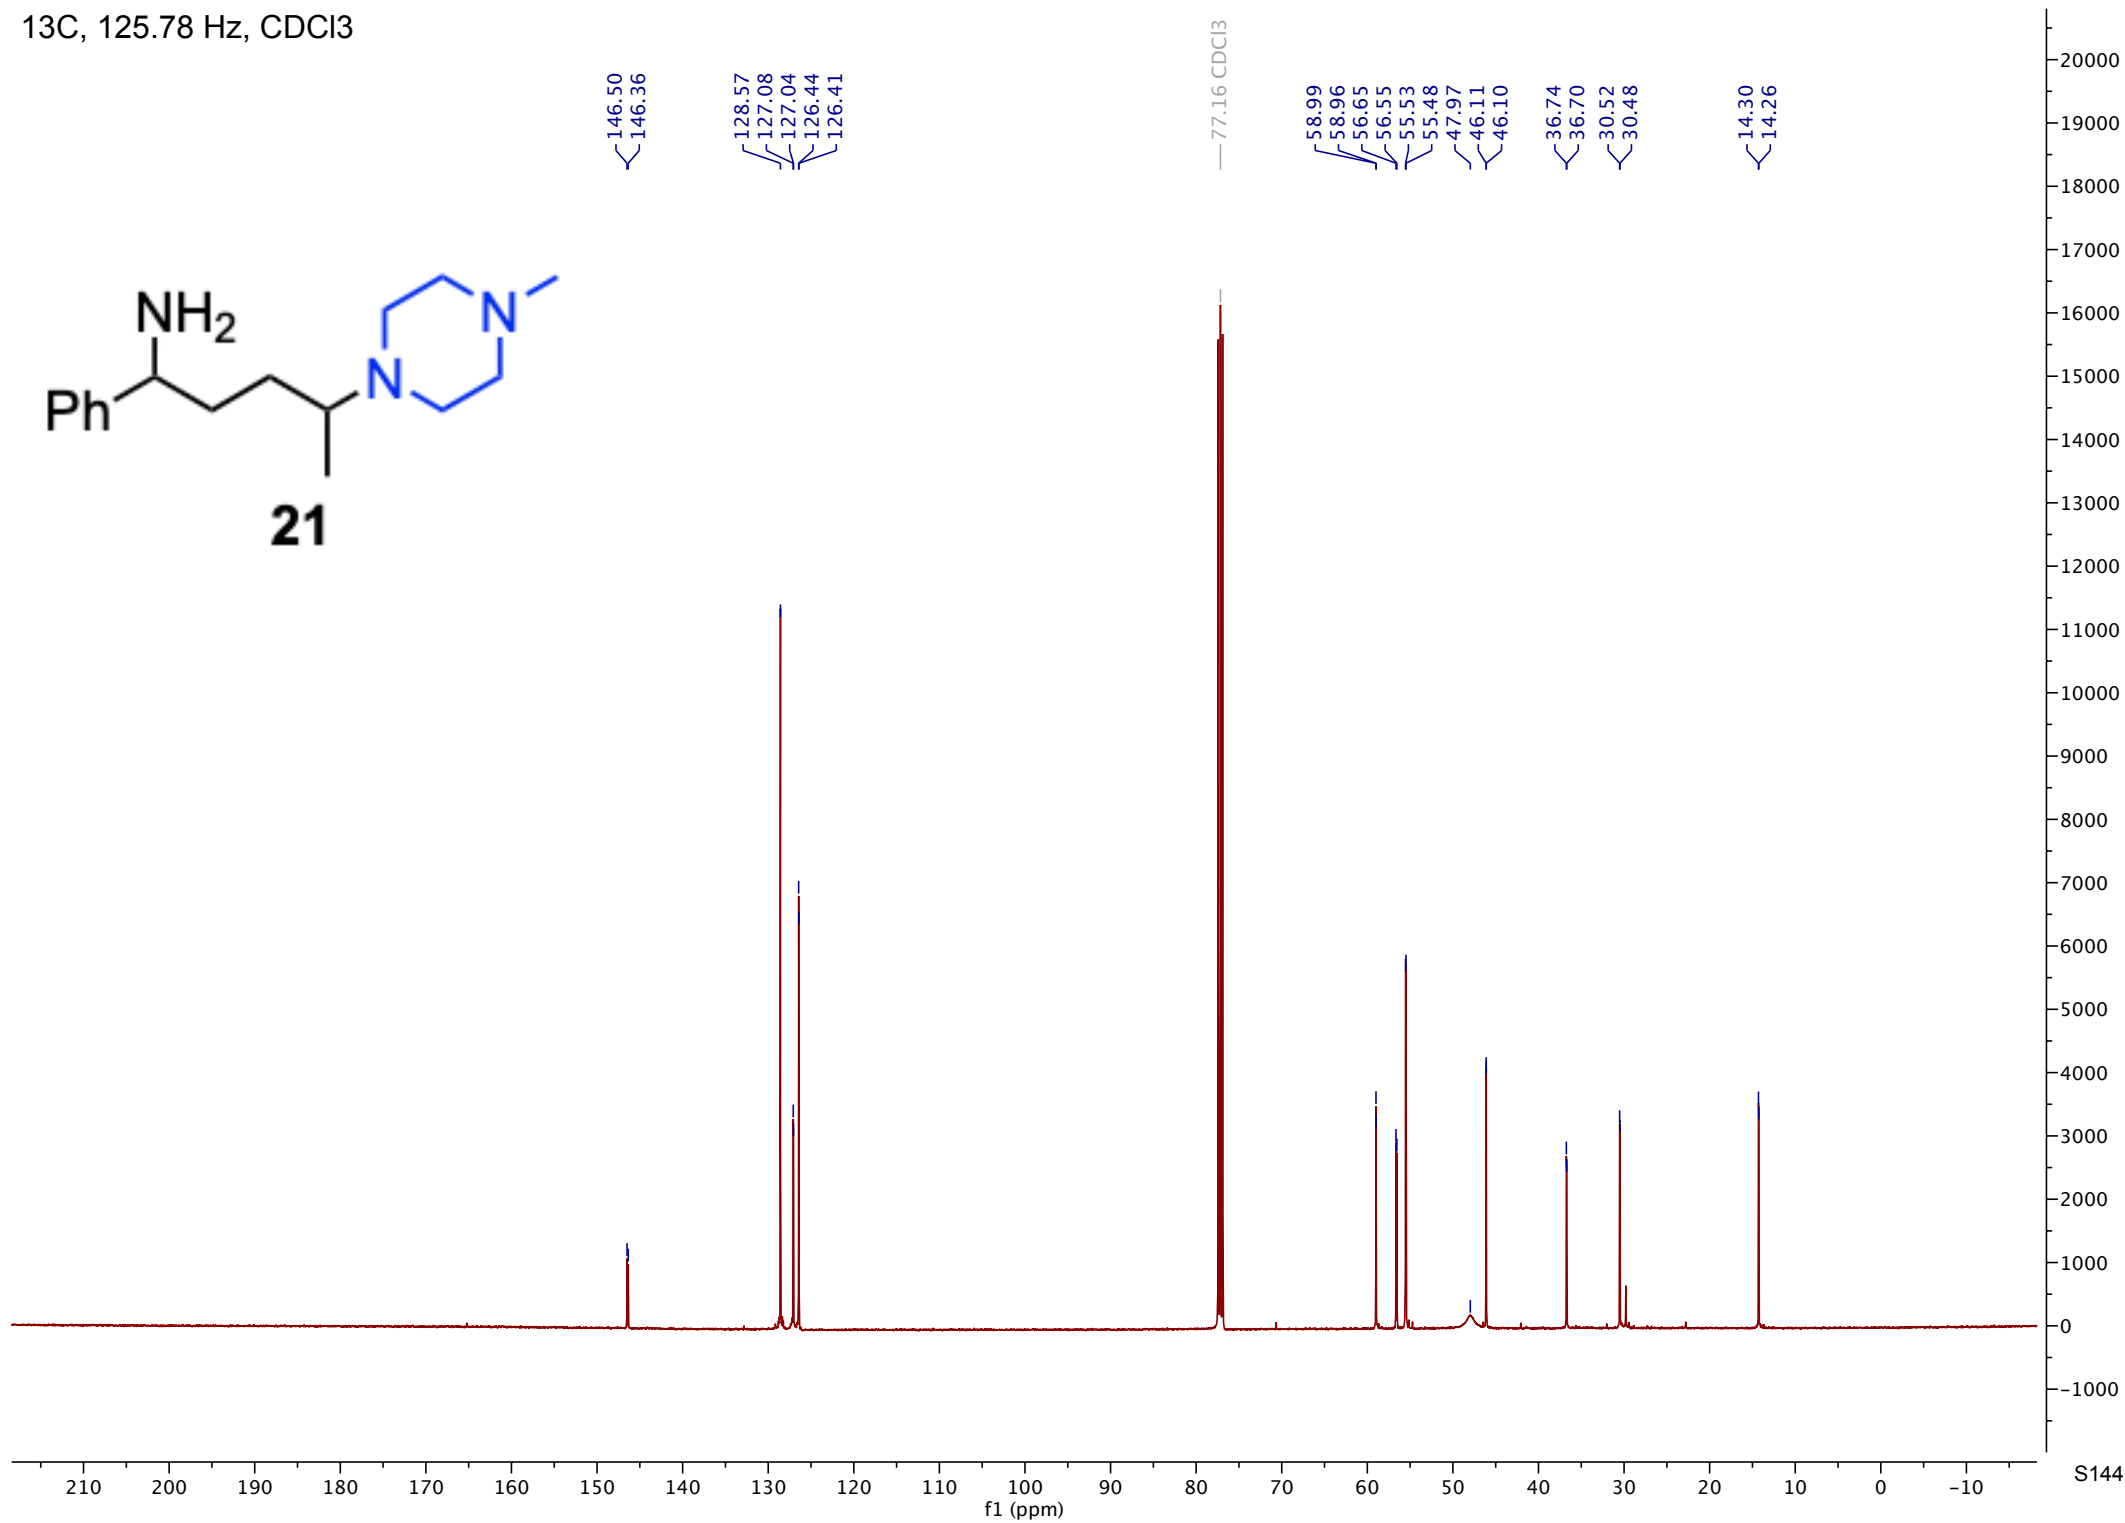



<sup>1</sup>H, 500.35 Hz, CDCl<sub>3</sub>

7.33  
7.31  
7.30  
7.27  
7.27  
7.26 CDCl<sub>3</sub>  
7.24  
7.24  
7.23  
7.22  
7.22  
7.21

3.72  
3.71  
3.70  
3.69

2.48  
2.47  
2.45  
2.44  
2.43  
2.42  
2.41  
2.40  
2.39  
2.35  
2.34  
2.34  
2.33  
2.33  
2.32  
1.58

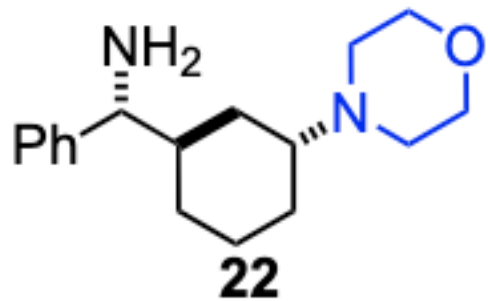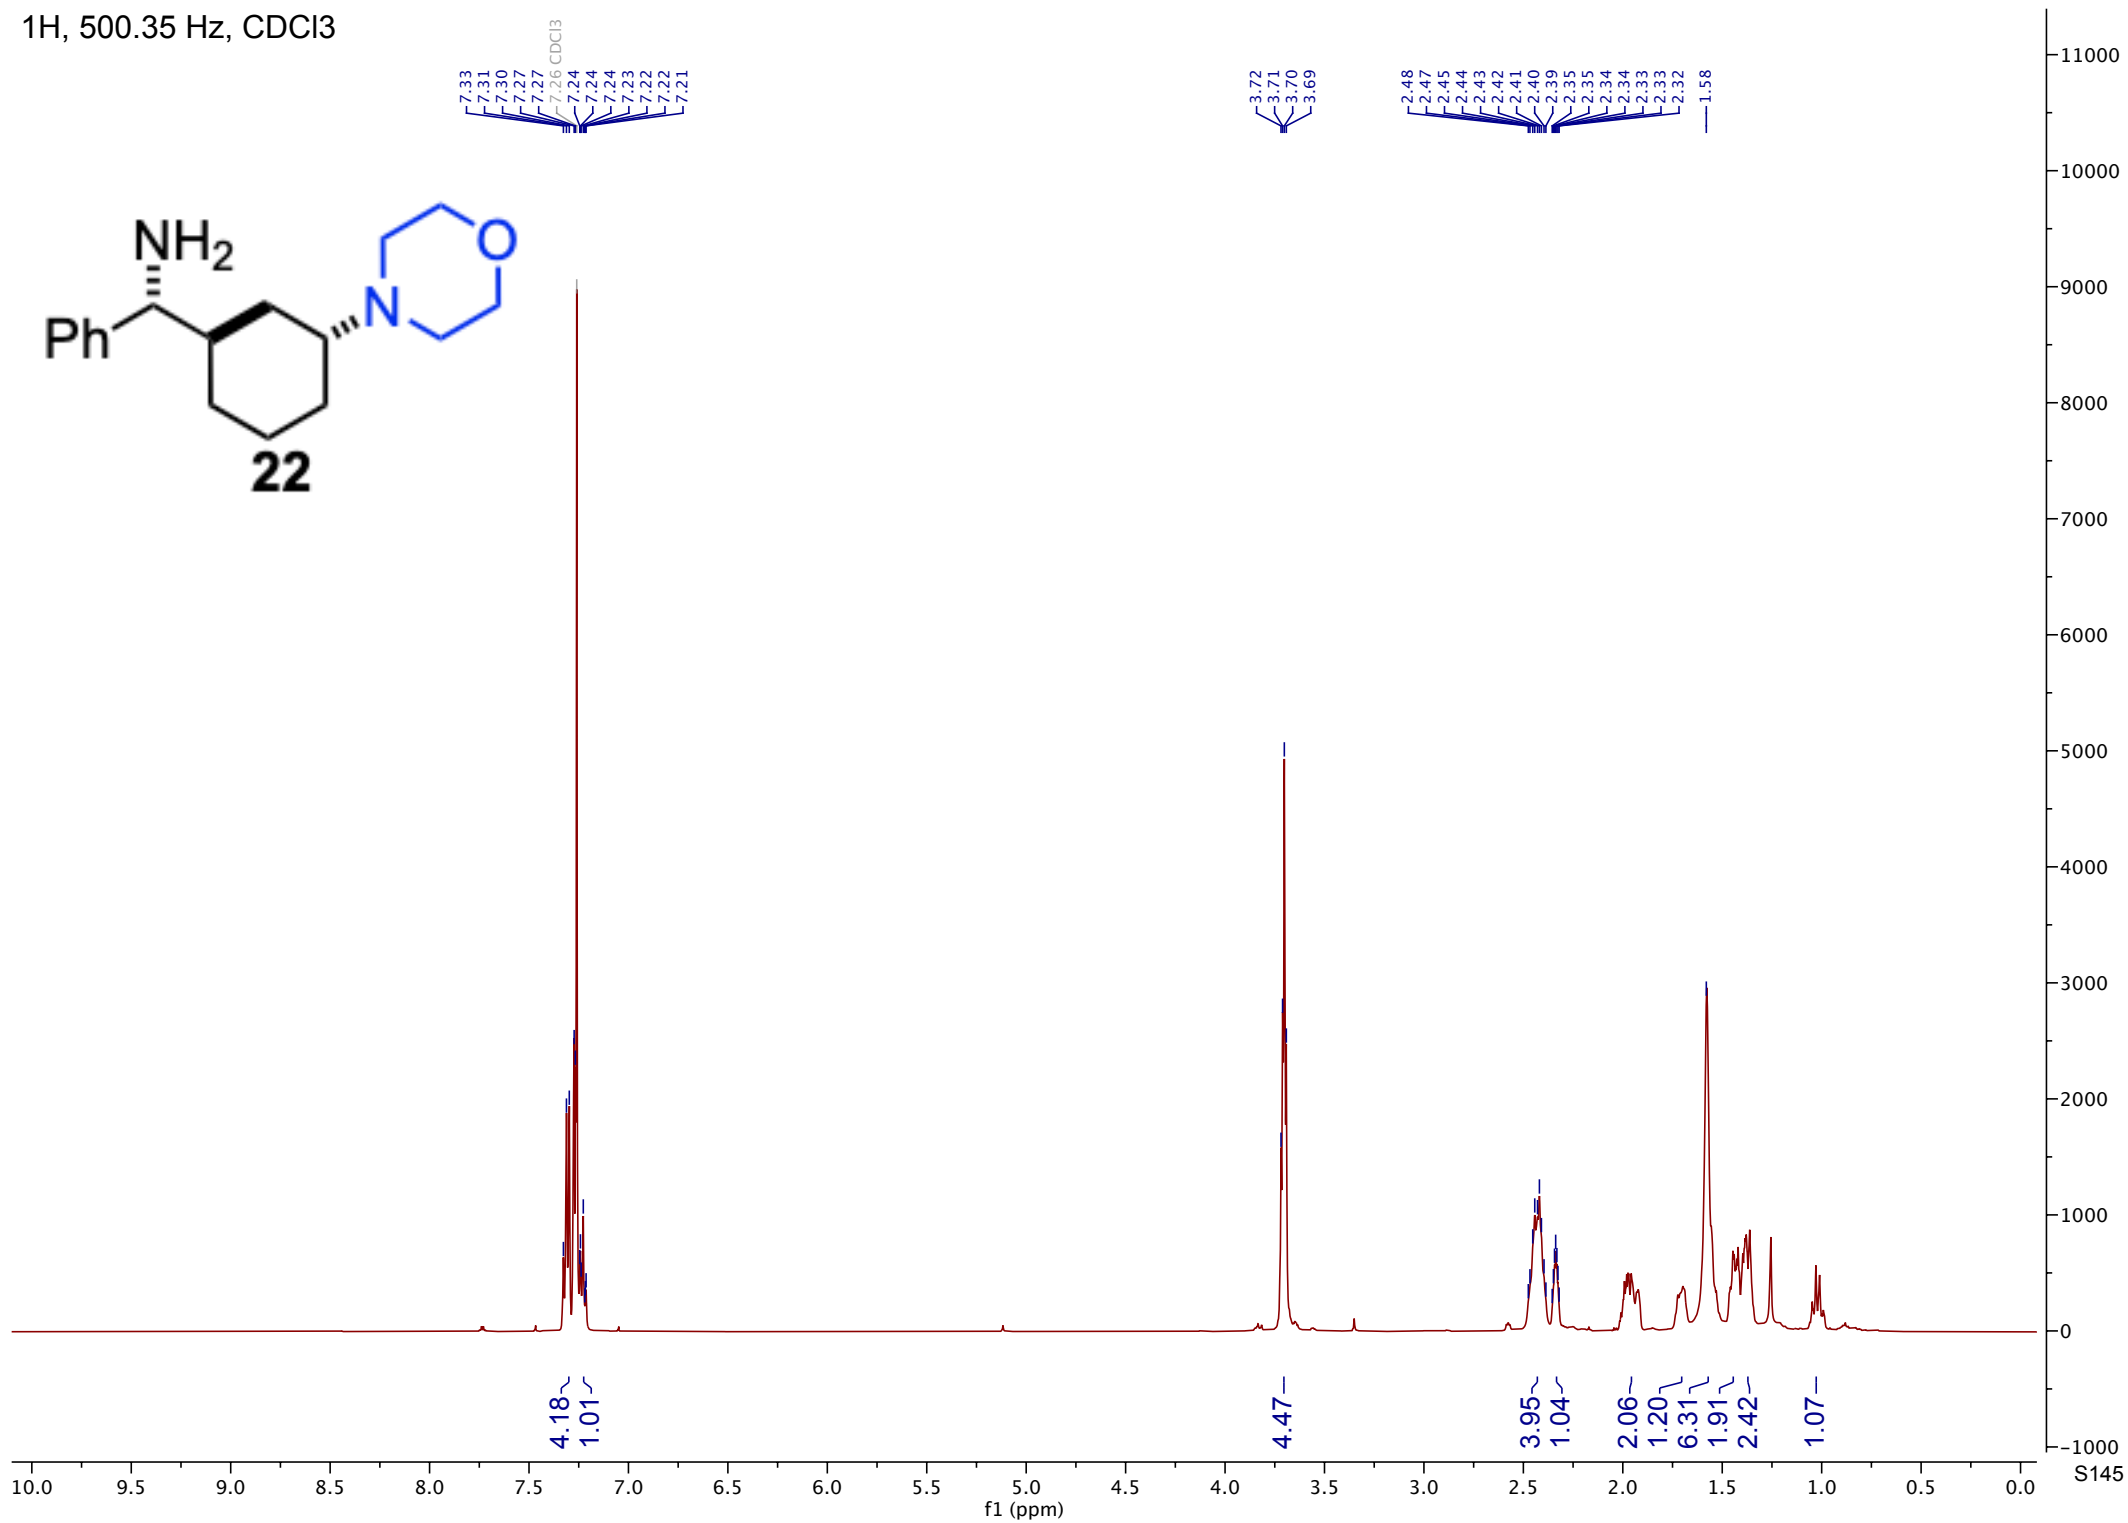

$^{13}\text{C}$ , 125.83 Hz,  $\text{CDCl}_3$

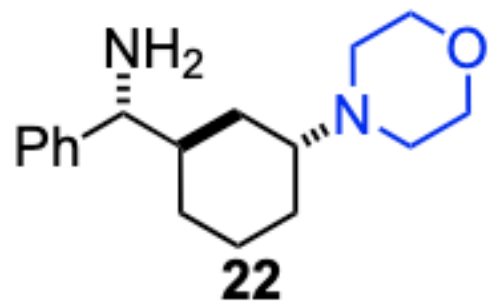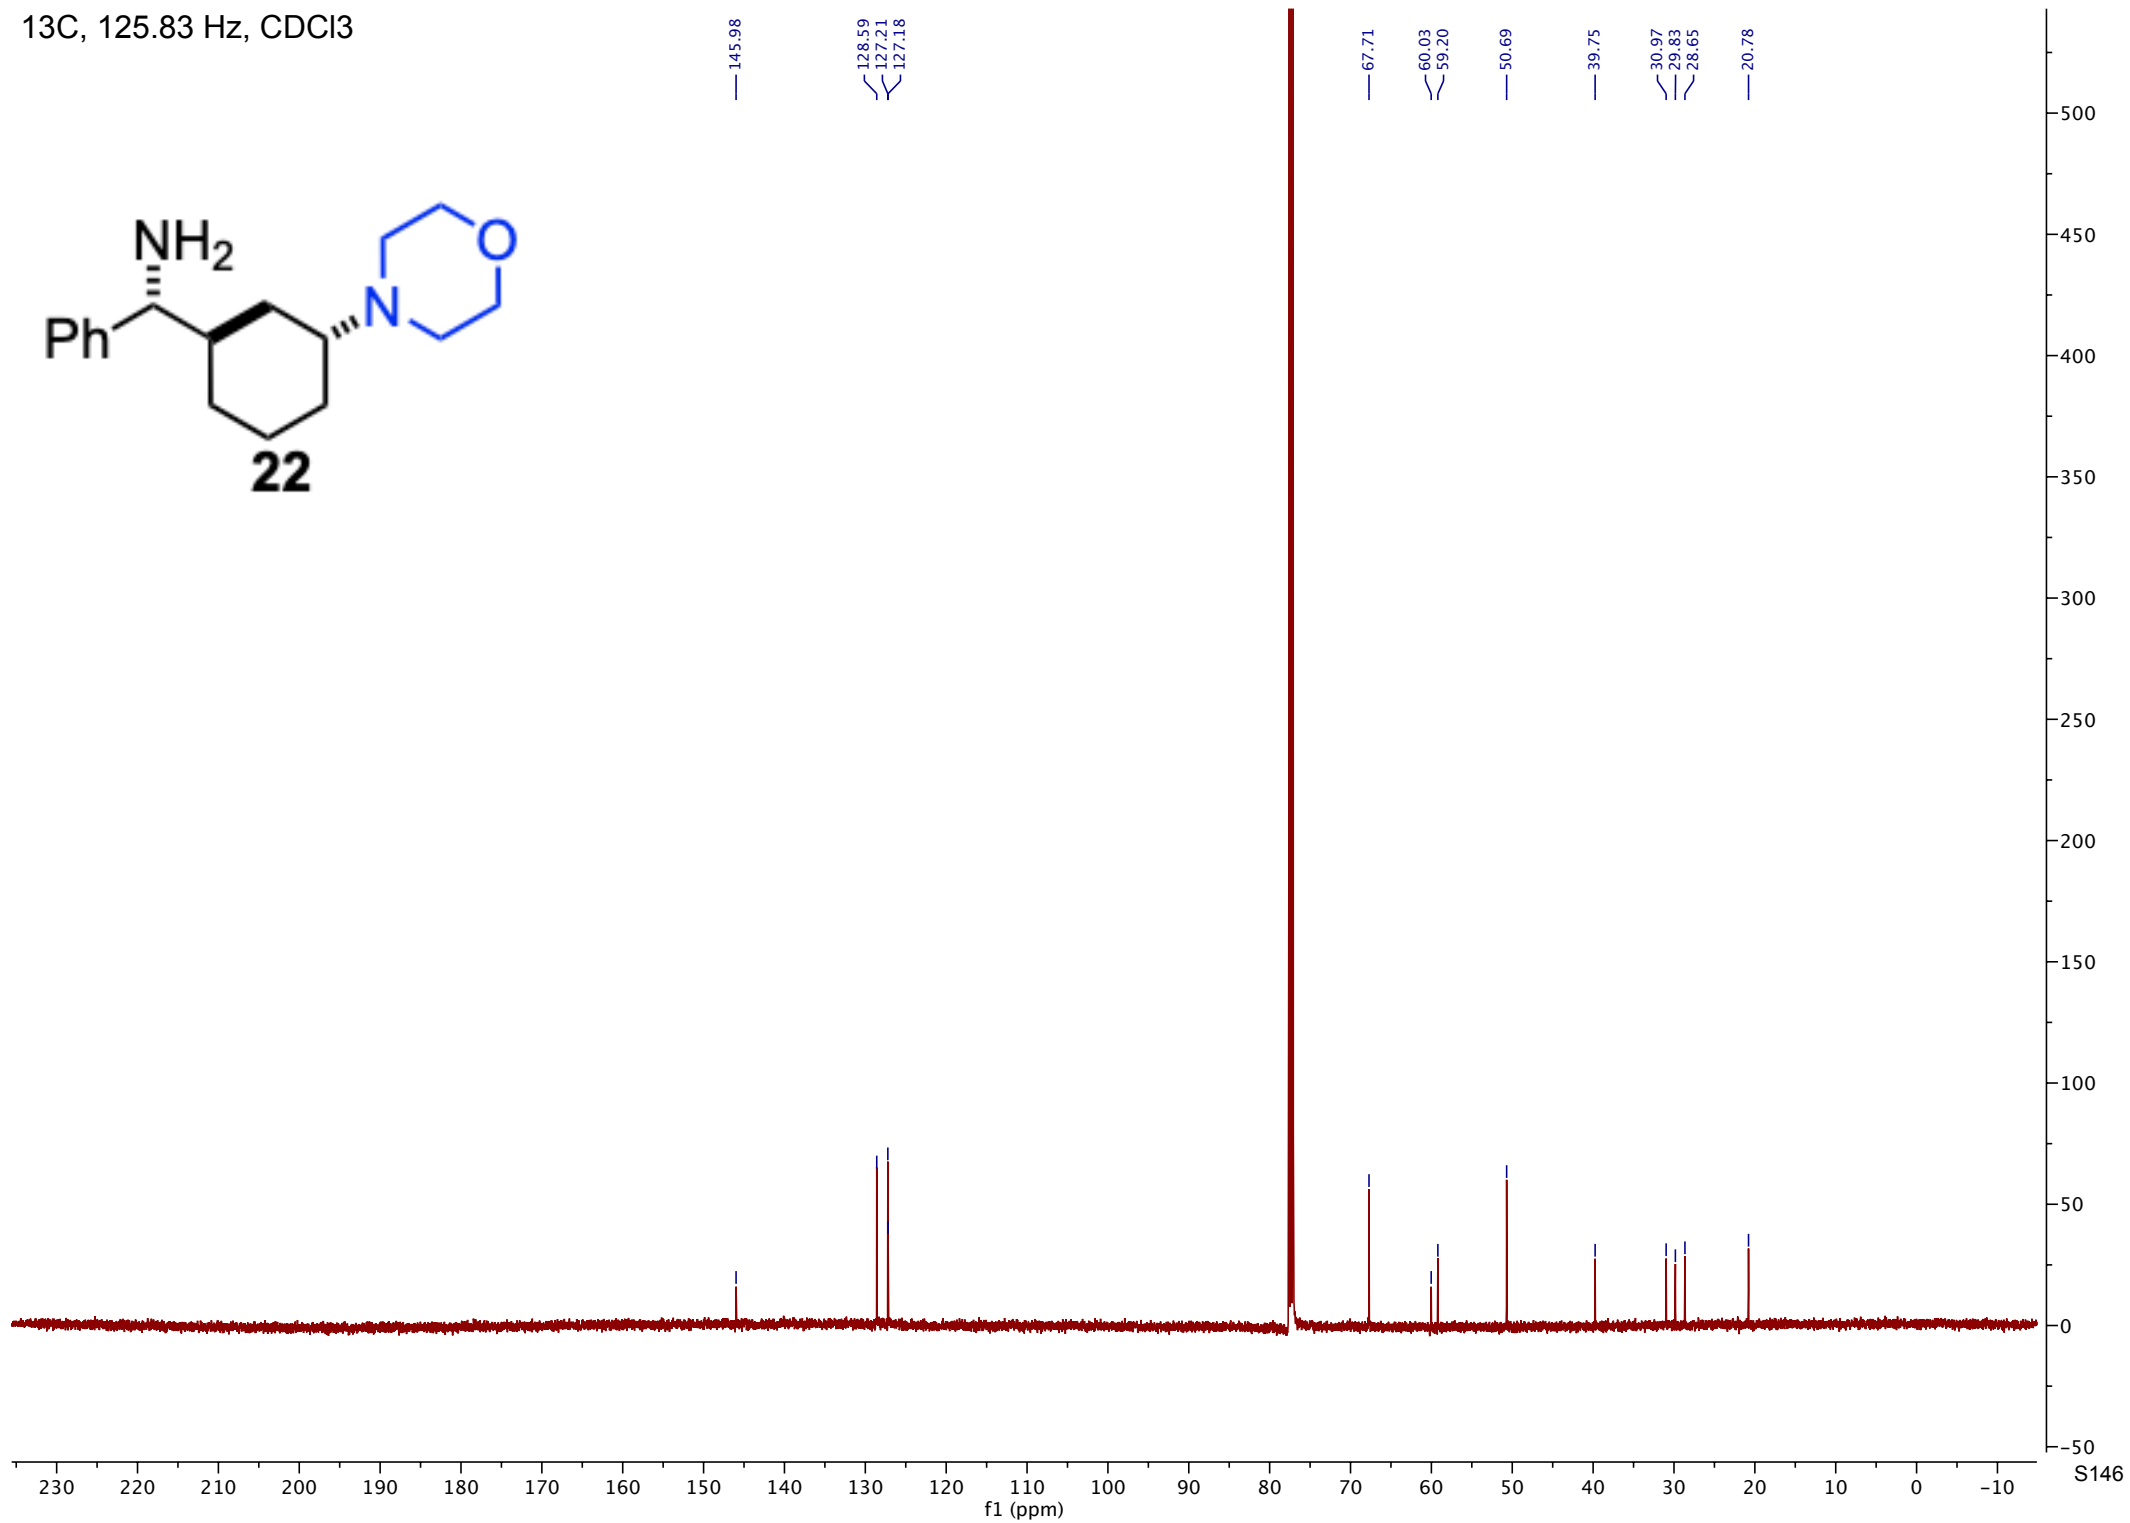

Supplement: d3cc05594a1.pdf [file d3cc05594a1.pdf]
